# Supplementary material for: Immune-Related Gene SERPINE1 Is a Novel Biomarker for Diffuse Lower-Grade Gliomas via Large-Scale Analysis
Source: Front Oncol. 2021 May 20;11:646060. doi: 10.3389/fonc.2021.646060 (PMC8173178; doi:10.3389/fonc.2021.646060)
Supplement: Supplementary file 6 [file DataSheet_1.xlsx]

## Sheet: Table 1
ID	StromalScore	ImmuneScore	ESTIMATEScore
TCGA-CS-4938-01B-11R-1896-07	-698.605	-97.9337	-796.538
TCGA-CS-4941-01A-01R-1470-07	-390.377	922.045	531.667
TCGA-CS-4942-01A-01R-1470-07	-576.091	928.907	352.816
TCGA-CS-4943-01A-01R-1470-07	-879.731	-114.407	-994.138
TCGA-CS-4944-01A-01R-1470-07	-695.765	141.068	-554.697
TCGA-CS-5393-01A-01R-1470-07	-833.274	330.722	-502.552
TCGA-CS-5394-01A-01R-1470-07	-1557.74	-1088.69	-2646.43
TCGA-CS-5395-01A-01R-1470-07	-786.572	-604.451	-1391.02
TCGA-CS-5396-01A-02R-1470-07	-785.669	-288.572	-1074.24
TCGA-CS-5397-01A-01R-1896-07	-410.694	41.8553	-368.838
TCGA-CS-6186-01A-12R-2027-07	-1019.48	-276.993	-1296.48
TCGA-CS-6188-01A-11R-1896-07	-404.471	348.248	-56.2222
TCGA-CS-6290-01A-11R-1708-07	-307.682	1211.65	903.972
TCGA-CS-6666-01A-11R-1896-07	-553.465	-61.3732	-614.838
TCGA-CS-6667-01A-12R-2027-07	-906.204	-151.57	-1057.77
TCGA-CS-6668-01A-11R-1896-07	-1707.52	-1088.66	-2796.17
TCGA-CS-6669-01A-11R-1896-07	-1301.94	-1387.05	-2688.98
TCGA-CS-6670-01A-11R-1896-07	-1205.5	-920.274	-2125.78
TCGA-DB-5270-01A-02R-1470-07	-405.789	-41.2861	-447.075
TCGA-DB-5273-01A-01R-1470-07	-237.065	550.58	313.515
TCGA-DB-5274-01A-01R-1470-07	-569.831	336.767	-233.064
TCGA-DB-5275-01A-01R-1470-07	-1165.13	-304.031	-1469.16
TCGA-DB-5277-01A-01R-1470-07	-1062.79	-734.17	-1796.96
TCGA-DB-5278-01A-01R-1470-07	-966.499	-659.783	-1626.28
TCGA-DB-5279-01A-03R-2347-07	-1018.54	-404.11	-1422.65
TCGA-DB-5280-01A-01R-1470-07	-878.414	-448.27	-1326.68
TCGA-DB-5281-01A-01R-1470-07	-708.478	-465.889	-1174.37
TCGA-DB-A4X9-01A-11R-A26U-07	-1266.99	-455.95	-1722.94
TCGA-DB-A4XA-01A-11R-A26U-07	-854.578	-62.6068	-917.185
TCGA-DB-A4XB-01A-11R-A26U-07	-1275.67	-478.082	-1753.75
TCGA-DB-A4XC-01A-11R-A26U-07	-909.509	146.892	-762.616
TCGA-DB-A4XD-01A-11R-A27Q-07	-1122.03	-457.593	-1579.62
TCGA-DB-A4XE-01A-11R-A27Q-07	-1216.92	-481.245	-1698.17
TCGA-DB-A4XF-01A-11R-A27Q-07	-783.655	-147.758	-931.413
TCGA-DB-A4XG-01A-11R-A27Q-07	-1663.81	-1361.83	-3025.64
TCGA-DB-A4XH-01A-11R-A27Q-07	-1246.88	-1117.81	-2364.69
TCGA-DB-A64L-01A-11R-A29R-07	-1266.66	-264.295	-1530.96
TCGA-DB-A64O-01A-11R-A29R-07	-642.538	-142.349	-784.887
TCGA-DB-A64P-01A-11R-A29R-07	-903.422	-323.532	-1226.95
TCGA-DB-A64Q-01A-11R-A29R-07	-1379.25	-689.781	-2069.03
TCGA-DB-A64R-01A-11R-A29R-07	-1422.89	-1095.78	-2518.67
TCGA-DB-A64S-01A-11R-A29R-07	-354.111	708.112	354.001
TCGA-DB-A64U-01A-11R-A29R-07	-1148.44	-689.025	-1837.46
TCGA-DB-A64V-01A-11R-A29R-07	-496.951	773.029	276.077
TCGA-DB-A64W-01A-11R-A29R-07	-1746.6	-1676	-3422.6
TCGA-DB-A64X-01A-11R-A29R-07	-1139.72	-465.094	-1604.81
TCGA-DB-A75K-01A-11R-A32Q-07	-731.418	243.765	-487.653
TCGA-DB-A75L-01A-11R-A32Q-07	-962.11	-175.639	-1137.75
TCGA-DB-A75M-01A-11R-A32Q-07	-898.385	-14.0697	-912.455
TCGA-DB-A75O-01A-11R-A32Q-07	-775.127	579.57	-195.557
TCGA-DB-A75P-01A-11R-A32Q-07	-660.509	-235.773	-896.282
TCGA-DH-5140-01A-01R-1470-07	-909.639	-568.099	-1477.74
TCGA-DH-5141-01A-01R-1470-07	-998.212	-359.849	-1358.06
TCGA-DH-5142-01A-01R-1470-07	-286.514	1167.59	881.077
TCGA-DH-5143-01A-01R-1470-07	-695.958	-7.95911	-703.917
TCGA-DH-5144-01A-01R-1470-07	-1355.76	-677.151	-2032.91
TCGA-DH-A669-01A-12R-A31N-07	-1019.41	-53.8491	-1073.26
TCGA-DH-A66B-01A-11R-A29R-07	-555.06	772.401	217.341
TCGA-DH-A66D-01A-11R-A31N-07	-752.476	409.408	-343.068
TCGA-DH-A66F-01A-11R-A29R-07	-1288.74	-705.729	-1994.47
TCGA-DH-A66G-01A-21R-A31N-07	-416.811	146.074	-270.737
TCGA-DH-A7UR-01A-11R-A33Z-07	-1134.52	-986.056	-2120.58
TCGA-DH-A7US-01A-11R-A33Z-07	-1230.53	-527.707	-1758.23
TCGA-DH-A7UT-01A-12R-A34F-07	-976.596	102.492	-874.105
TCGA-DH-A7UU-01A-12R-A34F-07	-1116.63	-382.674	-1499.31
TCGA-DH-A7UV-01A-12R-A34F-07	-1027.02	49.4071	-977.611
TCGA-DU-5847-01A-11R-1708-07	-269.511	904.976	635.465
TCGA-DU-5849-01A-11R-1708-07	-1154.15	-579.381	-1733.53
TCGA-DU-5852-01A-11R-1708-07	-216.854	414.481	197.628
TCGA-DU-5853-01A-11R-1896-07	-613.668	567.208	-46.4598
TCGA-DU-5854-01A-11R-1708-07	-103.947	594.903	490.956
TCGA-DU-5855-01A-11R-1708-07	-690.261	475.023	-215.238
TCGA-DU-5870-01A-11R-1708-07	-791.922	-234.83	-1026.75
TCGA-DU-5871-01A-12R-1708-07	-923.683	202.099	-721.584
TCGA-DU-5872-02A-21R-A36H-07	900.911	2477.03	3377.94
TCGA-DU-5874-01A-11R-1708-07	-1437.09	-1053.95	-2491.04
TCGA-DU-6392-01A-11R-1708-07	-317.341	250.269	-67.0718
TCGA-DU-6393-01A-11R-1708-07	-1551.8	-1028.75	-2580.55
TCGA-DU-6394-01A-11R-1708-07	-1185.47	-498.55	-1684.02
TCGA-DU-6395-01A-13R-1708-07	-894.299	-31.4552	-925.754
TCGA-DU-6396-01A-11R-1708-07	-32.7779	1512.49	1479.71
TCGA-DU-6397-01A-11R-1708-07	-938.194	-317.159	-1255.35
TCGA-DU-6399-01A-12R-1708-07	-550.922	313.108	-237.815
TCGA-DU-6400-01A-12R-1708-07	-1400.76	-736.264	-2137.02
TCGA-DU-6401-01A-11R-1708-07	-515.576	-26.2552	-541.832
TCGA-DU-6402-01A-11R-1708-07	-168.23	886.763	718.532
TCGA-DU-6403-01A-11R-1708-07	-800.554	380.694	-419.86
TCGA-DU-6404-02A-21R-A36H-07	-731.746	238.877	-492.869
TCGA-DU-6405-01A-11R-1708-07	-918.007	-0.518527	-918.526
TCGA-DU-6406-01A-11R-1708-07	-728.501	139.961	-588.54
TCGA-DU-6407-02A-12R-A36H-07	-890.27	318.16	-572.11
TCGA-DU-6408-01A-11R-1708-07	-925.937	54.3981	-871.539
TCGA-DU-6410-01A-11R-1896-07	-1611.78	-1478.28	-3090.05
TCGA-DU-6542-01A-11R-1896-07	-604.438	441.559	-162.878
TCGA-DU-7006-01A-11R-2027-07	-163.133	994.854	831.722
TCGA-DU-7007-01A-11R-2027-07	97.1454	689.432	786.578
TCGA-DU-7008-01A-11R-2027-07	-1403.48	-785.414	-2188.89
TCGA-DU-7009-01A-11R-2027-07	-1394.29	-1135.25	-2529.54
TCGA-DU-7010-01A-11R-2027-07	-738.338	-486.572	-1224.91
TCGA-DU-7011-01A-11R-2027-07	129.602	770.526	900.128
TCGA-DU-7012-01A-11R-2027-07	680.583	1673.18	2353.76
TCGA-DU-7013-01A-11R-2027-07	-753.017	76.6751	-676.342
TCGA-DU-7014-01A-11R-2027-07	-788.443	-104.895	-893.337
TCGA-DU-7015-01A-11R-2027-07	-631.378	714.098	82.72
TCGA-DU-7018-01A-11R-2027-07	-1349.87	-1096.43	-2446.3
TCGA-DU-7019-01A-11R-2027-07	-453.968	41.7109	-412.257
TCGA-DU-7290-01A-11R-2027-07	-14.7341	1189.42	1174.69
TCGA-DU-7292-01A-11R-2027-07	-969.195	-807.868	-1777.06
TCGA-DU-7294-01A-11R-2027-07	-1202.06	-741.993	-1944.05
TCGA-DU-7298-01A-11R-2027-07	-1006.03	-108.262	-1114.29
TCGA-DU-7299-01A-21R-2027-07	-1004.1	17.0554	-987.046
TCGA-DU-7300-01A-21R-2090-07	-806.381	-398.202	-1204.58
TCGA-DU-7301-01A-11R-2090-07	-365.28	442.63	77.3505
TCGA-DU-7302-01A-11R-2090-07	-1418.83	-1064.22	-2483.05
TCGA-DU-7304-01A-12R-2090-07	-684.199	268.694	-415.504
TCGA-DU-7306-01A-11R-2090-07	-685.692	-9.94218	-695.634
TCGA-DU-7309-01A-11R-2090-07	-754.449	-407.374	-1161.82
TCGA-DU-8158-01A-11R-2256-07	-78.2948	871.21	792.915
TCGA-DU-8161-01A-11R-2256-07	-46.9138	1051.24	1004.33
TCGA-DU-8162-01A-21R-2256-07	-727.629	-608.492	-1336.12
TCGA-DU-8163-01A-11R-2256-07	-570.423	522.257	-48.1665
TCGA-DU-8164-01A-11R-2256-07	-1407.01	-1114.81	-2521.82
TCGA-DU-8165-01A-11R-2256-07	61.4172	678.468	739.885
TCGA-DU-8166-01A-11R-2256-07	-864.604	-95.3462	-959.95
TCGA-DU-8167-01A-11R-2256-07	-388.543	436.947	48.4044
TCGA-DU-8168-01A-11R-2256-07	-1666.99	-1013.57	-2680.56
TCGA-DU-A5TP-01A-11R-A28M-07	-482.659	1289.26	806.597
TCGA-DU-A5TR-01A-11R-A28M-07	-136.349	1684.96	1548.61
TCGA-DU-A5TS-01A-11R-A28M-07	-1052.49	-177.711	-1230.2
TCGA-DU-A5TT-01A-11R-A28M-07	-591.097	-78.9573	-670.054
TCGA-DU-A5TU-01A-11R-A28M-07	-482.548	858.975	376.427
TCGA-DU-A5TW-01A-11R-A28M-07	-1265.98	-464.835	-1730.82
TCGA-DU-A5TY-01A-11R-A28M-07	18.0225	1279.45	1297.47
TCGA-DU-A6S2-01A-21R-A32Q-07	-1369.22	-920.766	-2289.98
TCGA-DU-A6S3-01A-12R-A32Q-07	-1442.21	-1167.27	-2609.48
TCGA-DU-A6S6-01A-21R-A32Q-07	-1510.26	-1380.73	-2890.98
TCGA-DU-A6S7-01A-21R-A32Q-07	-947.903	225.202	-722.701
TCGA-DU-A6S8-01A-12R-A32Q-07	-1385.41	-854.099	-2239.51
TCGA-DU-A76K-01A-11R-A33Z-07	-1088.89	-1210	-2298.88
TCGA-DU-A76L-01A-11R-A32Q-07	330.23	775.861	1106.09
TCGA-DU-A76O-01A-11R-A32Q-07	-815.154	756.873	-58.282
TCGA-DU-A76R-01A-11R-A32Q-07	-828.549	-691.776	-1520.32
TCGA-DU-A7T6-01A-11R-A33Z-07	-888.038	-723.328	-1611.37
TCGA-DU-A7T8-01A-21R-A34R-07	-453.065	322.17	-130.895
TCGA-DU-A7TA-01A-11R-A33Z-07	-574.753	403.235	-171.518
TCGA-DU-A7TB-01A-11R-A33Z-07	-1092.46	-694.267	-1786.72
TCGA-DU-A7TC-01A-21R-A34R-07	-1315.88	-718.979	-2034.86
TCGA-DU-A7TD-01A-12R-A34F-07	-249.601	969.186	719.586
TCGA-DU-A7TG-01A-21R-A34R-07	-830.697	-461.353	-1292.05
TCGA-DU-A7TI-01A-11R-A33Z-07	-683.591	481.31	-202.281
TCGA-DU-A7TJ-01A-11R-A34R-07	-670.442	152.37	-518.072
TCGA-E1-5302-01A-01R-1470-07	-578.821	490.417	-88.4041
TCGA-E1-5303-01A-01R-1470-07	-383.581	959.251	575.67
TCGA-E1-5304-01A-01R-1470-07	-1769.17	-1208.3	-2977.47
TCGA-E1-5305-01A-01R-1896-07	-870.011	-191.18	-1061.19
TCGA-E1-5307-01A-01R-1896-07	-1069.31	-117.385	-1186.69
TCGA-E1-5311-01A-01R-1470-07	-1291.74	-977.217	-2268.95
TCGA-E1-5318-01A-01R-1470-07	-802.654	-511.244	-1313.9
TCGA-E1-5319-01A-01R-1896-07	-892.156	-269.874	-1162.03
TCGA-E1-5322-01A-01R-1470-07	-692.718	591.565	-101.153
TCGA-E1-A7YD-01A-11R-A34F-07	-951.821	-264.775	-1216.6
TCGA-E1-A7YE-01A-11R-A34F-07	-95.4023	1031.95	936.547
TCGA-E1-A7YH-01A-11R-A34F-07	-1106.42	-71.4058	-1177.83
TCGA-E1-A7YI-01A-11R-A34F-07	-1346.44	-503.397	-1849.84
TCGA-E1-A7YJ-01A-11R-A34F-07	-723.421	671.334	-52.0869
TCGA-E1-A7YK-01A-11R-A34F-07	-222.763	1207.84	985.079
TCGA-E1-A7YL-01A-11R-A34F-07	-184.391	983.043	798.652
TCGA-E1-A7YM-01A-11R-A34F-07	-1102.03	-353.485	-1455.51
TCGA-E1-A7YN-01A-11R-A34F-07	427.024	2012.87	2439.89
TCGA-E1-A7YO-01A-11R-A34F-07	-1250.73	-1028.73	-2279.46
TCGA-E1-A7YQ-01A-11R-A34R-07	261.48	1367.14	1628.62
TCGA-E1-A7YS-01A-11R-A34F-07	-1710.94	-1000.63	-2711.56
TCGA-E1-A7YU-01A-11R-A34R-07	-1081.77	-371.952	-1453.72
TCGA-E1-A7YV-01A-11R-A34R-07	-1385.81	-927.173	-2312.98
TCGA-E1-A7YW-01A-11R-A34R-07	-1039.88	-72.5028	-1112.38
TCGA-E1-A7YY-01A-11R-A34R-07	-1033.02	-825.395	-1858.41
TCGA-E1-A7Z2-01A-21R-A34R-07	-1172.11	-883.729	-2055.84
TCGA-E1-A7Z3-01A-11R-A34R-07	-704.925	-134.959	-839.885
TCGA-E1-A7Z4-01A-11R-A34R-07	-1081.29	364.615	-716.68
TCGA-E1-A7Z6-01A-11R-A34R-07	-944.719	-200.405	-1145.12
TCGA-EZ-7264-01A-11R-2027-07	-1472.25	-1102.61	-2574.85
TCGA-F6-A8O3-01A-11R-A36H-07	-1604.43	-1144.12	-2748.54
TCGA-F6-A8O4-01A-11R-A36H-07	-1340.66	-904.964	-2245.63
TCGA-FG-5962-01B-11R-1896-07	-1090.72	-767.826	-1858.54
TCGA-FG-5963-01A-11R-1708-07	-152.507	1140.83	988.32
TCGA-FG-5964-01A-11R-1708-07	-816.341	385.775	-430.566
TCGA-FG-5965-02A-11R-A29R-07	-673.592	234.845	-438.747
TCGA-FG-6688-01A-11R-1896-07	-370.314	758.381	388.067
TCGA-FG-6689-01A-11R-1896-07	-813.557	190.122	-623.435
TCGA-FG-6690-01A-11R-1896-07	-761.157	271.691	-489.466
TCGA-FG-6691-01A-11R-1896-07	-352.938	812.763	459.825
TCGA-FG-6692-01A-11R-1896-07	-674.759	355.833	-318.927
TCGA-FG-7634-01A-11R-2090-07	-88.3434	443.324	354.98
TCGA-FG-7636-01A-11R-2090-07	-1173.94	-299.296	-1473.24
TCGA-FG-7637-01A-11R-2090-07	-1030.73	-685.306	-1716.04
TCGA-FG-7638-01B-12R-2090-07	-1085.91	-633.922	-1719.83
TCGA-FG-7641-01B-11R-2256-07	-1571.43	-1355.84	-2927.28
TCGA-FG-7643-01A-11R-2090-07	-798.392	-638.515	-1436.91
TCGA-FG-8181-01A-11R-2256-07	-884.093	-910.226	-1794.32
TCGA-FG-8182-01A-11R-2256-07	-834.805	216.481	-618.324
TCGA-FG-8185-01A-11R-2256-07	-1213.07	-431.374	-1644.44
TCGA-FG-8186-01A-11R-2256-07	-696.121	373.034	-323.087
TCGA-FG-8187-01A-11R-2256-07	-899.448	-340.225	-1239.67
TCGA-FG-8188-01A-11R-2256-07	-772.617	-114.6	-887.216
TCGA-FG-8189-01B-11R-A28M-07	-1371.99	-1440.02	-2812.01
TCGA-FG-8191-01A-11R-2256-07	-640.868	228.656	-412.212
TCGA-FG-A4MT-02A-11R-A29R-07	-970.799	-439.541	-1410.34
TCGA-FG-A4MU-01B-11R-A28M-07	-155.797	763.21	607.413
TCGA-FG-A4MW-01A-11R-A26U-07	-862.726	-338.164	-1200.89
TCGA-FG-A4MX-01A-11R-A26U-07	-1282.66	-268.841	-1551.5
TCGA-FG-A4MY-01A-11R-A26U-07	-1059.4	-328.083	-1387.48
TCGA-FG-A60J-01A-11R-A28M-07	-800.569	-26.6237	-827.192
TCGA-FG-A60K-01A-11R-A29R-07	-1305.9	-386.661	-1692.56
TCGA-FG-A60L-01A-12R-A31N-07	-642.188	579.657	-62.5308
TCGA-FG-A6IZ-01A-11R-A31N-07	-1291.8	-249.826	-1541.62
TCGA-FG-A6J1-01A-11R-A31N-07	-886.786	65.6652	-821.121
TCGA-FG-A6J3-01A-11R-A31N-07	-106.323	1184.08	1077.76
TCGA-FG-A70Y-01A-12R-A34R-07	-701.031	323.012	-378.019
TCGA-FG-A70Z-01A-12R-A33Z-07	-11.7372	489.545	477.807
TCGA-FG-A710-01A-12R-A33Z-07	-632.225	642.861	10.6356
TCGA-FG-A711-01A-21R-A33Z-07	-1396.49	-465.9	-1862.4
TCGA-FG-A713-01A-11R-A32Q-07	-1121.3	-1135.48	-2256.78
TCGA-FG-A87N-01A-11R-A36H-07	-1259.39	-465.033	-1724.42
TCGA-FG-A87Q-01A-11R-A36H-07	1.26492	936.473	937.738
TCGA-FN-7833-01A-11R-2090-07	-84.0516	1190.55	1106.49
TCGA-HT-7467-01A-11R-2027-07	-1009.04	-732.384	-1741.42
TCGA-HT-7468-01A-11R-2027-07	-1138.64	-567.694	-1706.34
TCGA-HT-7469-01A-11R-2256-07	-1147.54	-525.889	-1673.43
TCGA-HT-7470-01A-12R-2090-07	-878.489	-516.339	-1394.83
TCGA-HT-7471-01A-11R-2256-07	-527.706	345.914	-181.791
TCGA-HT-7472-01A-11R-2027-07	-484.63	474.531	-10.0993
TCGA-HT-7473-01A-11R-2027-07	-117.875	1232.23	1114.36
TCGA-HT-7474-01A-11R-2027-07	-1069.74	-748.682	-1818.42
TCGA-HT-7475-01A-11R-2027-07	-1469.29	-1021.45	-2490.75
TCGA-HT-7476-01A-11R-2027-07	-357.476	-356.516	-713.992
TCGA-HT-7477-01B-11R-A28M-07	-973.184	-450.53	-1423.71
TCGA-HT-7478-01A-11R-2027-07	-32.4081	1416.17	1383.76
TCGA-HT-7479-01A-11R-2027-07	-390.651	360.958	-29.693
TCGA-HT-7480-01A-11R-2090-07	-1270.67	-940.997	-2211.67
TCGA-HT-7481-01A-11R-2027-07	-1168.85	-873.084	-2041.94
TCGA-HT-7482-01A-11R-2027-07	-496	379.335	-116.665
TCGA-HT-7483-01A-11R-2027-07	-690.694	-492.767	-1183.46
TCGA-HT-7485-01A-11R-2027-07	-834.518	-122.888	-957.405
TCGA-HT-7601-01A-11R-2090-07	91.4205	1350.83	1442.25
TCGA-HT-7602-01A-21R-2090-07	-771.864	52.842	-719.022
TCGA-HT-7603-01A-21R-2090-07	-1268.14	-933.162	-2201.31
TCGA-HT-7604-01A-11R-2090-07	-1034.29	-515.908	-1550.19
TCGA-HT-7605-01A-11R-2090-07	-1027.54	-772.897	-1800.44
TCGA-HT-7606-01A-11R-2090-07	-1278.82	-531.646	-1810.47
TCGA-HT-7607-01A-11R-2090-07	-880.591	-632.817	-1513.41
TCGA-HT-7608-01A-11R-2090-07	-785.601	-215.849	-1001.45
TCGA-HT-7609-01A-11R-2090-07	-870.227	154.595	-715.631
TCGA-HT-7610-01A-21R-2090-07	-1113.7	-851.473	-1965.17
TCGA-HT-7611-01A-11R-2403-07	-656.166	123.378	-532.787
TCGA-HT-7616-01A-11R-2256-07	-210.751	884.883	674.132
TCGA-HT-7620-01A-11R-2256-07	-1095.12	-260.244	-1355.36
TCGA-HT-7676-01A-11R-2403-07	-743.376	605.635	-137.741
TCGA-HT-7677-01A-11R-2256-07	-1121.09	-693.748	-1814.83
TCGA-HT-7680-01A-11R-2256-07	-222.897	615.028	392.131
TCGA-HT-7681-01A-11R-2403-07	-919.096	-320.747	-1239.84
TCGA-HT-7684-01A-11R-2256-07	-624.667	412.822	-211.845
TCGA-HT-7686-01A-11R-2256-07	-271.831	1217.22	945.392
TCGA-HT-7687-01A-11R-2256-07	-987.115	-339.598	-1326.71
TCGA-HT-7688-01A-11R-2256-07	-1280.18	-1020.68	-2300.85
TCGA-HT-7689-01A-11R-2256-07	-912.843	-60.0638	-972.907
TCGA-HT-7690-01A-11R-2256-07	-214.838	720.223	505.386
TCGA-HT-7691-01A-11R-2256-07	-90.5816	657.217	566.635
TCGA-HT-7692-01A-12R-2256-07	-1222.2	-455.523	-1677.72
TCGA-HT-7693-01A-11R-2256-07	-759.173	541.254	-217.919
TCGA-HT-7694-01A-11R-2256-07	-1343.44	-1122.55	-2466
TCGA-HT-7695-01A-11R-2256-07	-1184.33	-1018.53	-2202.86
TCGA-HT-7854-01A-11R-2256-07	-257.571	701.699	444.128
TCGA-HT-7855-01A-11R-2403-07	-1121.2	-292.329	-1413.53
TCGA-HT-7856-01A-11R-2403-07	-1149.24	-985.886	-2135.13
TCGA-HT-7857-01A-11R-2403-07	964.771	2142.13	3106.9
TCGA-HT-7858-01A-11R-2403-07	-634.318	762.945	128.627
TCGA-HT-7860-01A-11R-2403-07	-370.627	623.982	253.355
TCGA-HT-7873-01B-11R-2403-07	-917.121	-194.347	-1111.47
TCGA-HT-7874-01A-11R-2403-07	-1164.84	-1000.41	-2165.25
TCGA-HT-7875-01A-11R-2403-07	-1341.37	-1132.91	-2474.28
TCGA-HT-7877-01A-11R-2403-07	-1223.01	-820.932	-2043.95
TCGA-HT-7879-01A-11R-2403-07	-763.233	-83.3964	-846.629
TCGA-HT-7880-01A-11R-2403-07	-1035.24	-623.842	-1659.08
TCGA-HT-7881-01A-11R-2403-07	-1407.68	-1206.59	-2614.27
TCGA-HT-7882-01A-11R-2403-07	1710.69	2052.22	3762.91
TCGA-HT-7884-01B-11R-2403-07	-1267.15	-831.507	-2098.66
TCGA-HT-7902-01A-12R-2403-07	-1070.16	-391.243	-1461.4
TCGA-HT-8010-01A-11R-2403-07	-847.041	-502.173	-1349.21
TCGA-HT-8011-01A-11R-2403-07	-1110.94	-472.066	-1583.01
TCGA-HT-8012-01A-11R-2403-07	-1207	-621.872	-1828.87
TCGA-HT-8013-01A-11R-2403-07	-500.638	1150.14	649.503
TCGA-HT-8015-01B-11R-A28M-07	-588.296	-89.8647	-678.161
TCGA-HT-8018-01A-11R-2404-07	179.389	497.494	676.883
TCGA-HT-8019-01A-21R-2404-07	-1188.31	-1279.72	-2468.03
TCGA-HT-8104-01A-11R-2404-07	-607.653	-261.338	-868.991
TCGA-HT-8105-01A-11R-2404-07	-1218.82	-530.702	-1749.53
TCGA-HT-8107-01A-13R-2404-07	-1017.55	-1079.48	-2097.03
TCGA-HT-8108-01A-11R-2404-07	-829.298	558.409	-270.89
TCGA-HT-8109-01A-11R-2404-07	-998.256	-517.943	-1516.2
TCGA-HT-8110-01A-11R-2404-07	-109.249	1468.84	1359.59
TCGA-HT-8111-01A-11R-2404-07	-725.407	431.11	-294.297
TCGA-HT-8113-01A-11R-2404-07	-1367.04	-1116.01	-2483.05
TCGA-HT-8114-01A-11R-2404-07	-159.241	810.476	651.235
TCGA-HT-8558-01A-21R-2404-07	-1246.35	-1266.93	-2513.28
TCGA-HT-8563-01A-11R-2404-07	691.579	2163.43	2855.01
TCGA-HT-8564-01A-11R-2404-07	-715.726	-244.952	-960.677
TCGA-HT-A4DS-01A-11R-A26U-07	-745.903	807.904	62.0006
TCGA-HT-A4DV-01A-11R-A26U-07	-1057.45	-359.734	-1417.19
TCGA-HT-A5R5-01A-11R-A28M-07	-442.056	559.823	117.767
TCGA-HT-A5R7-01A-11R-A28M-07	-1084.72	-632.894	-1717.61
TCGA-HT-A5R9-01A-11R-A28M-07	-1212.33	-899.549	-2111.88
TCGA-HT-A5RA-01A-11R-A28M-07	-422.834	201.844	-220.99
TCGA-HT-A5RB-01A-11R-A28M-07	-1263.41	-1028.18	-2291.6
TCGA-HT-A5RC-01A-11R-A28M-07	-603.123	211.728	-391.395
TCGA-HT-A614-01A-11R-A29R-07	-1117.39	-279.818	-1397.21
TCGA-HT-A615-01A-11R-A29R-07	-779.972	453.761	-326.21
TCGA-HT-A616-01A-11R-A29R-07	-1078.82	-832.226	-1911.04
TCGA-HT-A617-01A-11R-A29R-07	-120.09	751.777	631.687
TCGA-HT-A618-01A-11R-A29R-07	-394.761	1223.34	828.578
TCGA-HT-A619-01A-11R-A29R-07	-1584.25	-1052.16	-2636.41
TCGA-HT-A61A-01A-11R-A29R-07	-1129.19	-980.162	-2109.35
TCGA-HT-A61B-01A-11R-A29R-07	-332.665	1225.55	892.889
TCGA-HT-A61C-01A-11R-A29R-07	-575.619	315.921	-259.698
TCGA-HT-A74H-01A-11R-A32Q-07	-227.122	424.547	197.425
TCGA-HT-A74J-01A-12R-A32Q-07	-1196.48	-220.015	-1416.49
TCGA-HT-A74K-01A-11R-A32Q-07	-567.546	22.7022	-544.844
TCGA-HT-A74L-01A-11R-A32Q-07	-1090.61	-200.755	-1291.37
TCGA-HT-A74O-01A-11R-A32Q-07	-449.44	1017.41	567.966
TCGA-HW-7486-01A-11R-2027-07	-828.005	-166.269	-994.274
TCGA-HW-7487-01A-11R-2027-07	-1370.9	-981.698	-2352.6
TCGA-HW-7489-01A-11R-2027-07	-1049.13	-606.374	-1655.51
TCGA-HW-7490-01A-11R-2027-07	-735.971	85.6727	-650.298
TCGA-HW-7491-01A-11R-2027-07	-1317.42	-800.318	-2117.74
TCGA-HW-7493-01A-11R-2027-07	-267.839	161.75	-106.089
TCGA-HW-7495-01A-11R-2027-07	-1210.78	-1037.22	-2248
TCGA-HW-8319-01A-11R-2404-07	-1066.7	-575.137	-1641.84
TCGA-HW-8320-01A-11R-2404-07	-872.261	-33.0854	-905.347
TCGA-HW-8321-01A-11R-2404-07	-805.489	-78.7488	-884.238
TCGA-HW-8322-01A-11R-2404-07	-1251.53	-451.177	-1702.71
TCGA-HW-A5KJ-01A-12R-A27Q-07	-1414.86	-768.663	-2183.52
TCGA-HW-A5KK-01A-11R-A27Q-07	-277.809	1055.46	777.654
TCGA-HW-A5KL-01A-11R-A27Q-07	-982.558	-47.9621	-1030.52
TCGA-HW-A5KM-01A-11R-A27Q-07	18.6224	1863.86	1882.48
TCGA-IK-7675-01A-11R-2090-07	-1179.55	-790.059	-1969.61
TCGA-IK-8125-01A-11R-2256-07	-1057.78	-567.813	-1625.6
TCGA-KT-A74X-01A-11R-A32Q-07	-1382.77	-410.762	-1793.53
TCGA-KT-A7W1-01A-11R-A34F-07	-1047.13	-364.924	-1412.05
TCGA-P5-A5ET-01A-11R-A27Q-07	-1361.56	-1107.6	-2469.16
TCGA-P5-A5EU-01A-11R-A27Q-07	-316.54	720.95	404.41
TCGA-P5-A5EV-01A-11R-A27Q-07	-1033.92	-91.3731	-1125.3
TCGA-P5-A5EW-01A-11R-A27Q-07	-811.471	-74.0211	-885.492
TCGA-P5-A5EX-01A-12R-A28M-07	5.82309	1196.62	1202.45
TCGA-P5-A5EY-01A-11R-A27Q-07	-792.791	-298.658	-1091.45
TCGA-P5-A5EZ-01A-11R-A27Q-07	-744.075	291.25	-452.825
TCGA-P5-A5F0-01A-11R-A28M-07	-1705.37	-1338.48	-3043.86
TCGA-P5-A5F1-01A-11R-A28M-07	-648.335	141.179	-507.156
TCGA-P5-A5F2-01A-11R-A28M-07	-1288.27	-889.999	-2178.27
TCGA-P5-A5F4-01A-11R-A28M-07	-1267.54	-1014.2	-2281.74
TCGA-P5-A5F6-01A-11R-A28M-07	-629.248	-363.413	-992.661
TCGA-P5-A72U-01A-31R-A32Q-07	298.271	776.34	1074.61
TCGA-P5-A72W-01A-11R-A32Q-07	-1189.24	-275.25	-1464.49
TCGA-P5-A72X-01A-11R-A32Q-07	-682.493	-344.444	-1026.94
TCGA-P5-A72Z-01A-11R-A32Q-07	-1547.32	-1035.76	-2583.08
TCGA-P5-A730-01A-11R-A32Q-07	-1067.63	-663.513	-1731.14
TCGA-P5-A731-01A-11R-A32Q-07	-514.301	-198.301	-712.602
TCGA-P5-A733-01A-11R-A32Q-07	-1098	-613.824	-1711.82
TCGA-P5-A735-01A-11R-A32Q-07	-1291.51	-339.186	-1630.69
TCGA-P5-A736-01A-11R-A32Q-07	-250.955	930.647	679.692
TCGA-P5-A737-01A-11R-A32Q-07	-1225.93	-514.996	-1740.93
TCGA-P5-A77W-01A-11R-A32Q-07	-1497.39	-988.834	-2486.22
TCGA-P5-A77X-01A-11R-A32Q-07	-1466.54	-1154.89	-2621.44
TCGA-P5-A780-01A-12R-A32Q-07	-635.17	8.29212	-626.877
TCGA-P5-A781-01A-11R-A32Q-07	-1114.89	-637.2	-1752.09
TCGA-QH-A65R-01A-21R-A31N-07	-1244.5	-742.47	-1986.97
TCGA-QH-A65S-01A-11R-A29R-07	-887.784	130.515	-757.27
TCGA-QH-A65V-01A-11R-A29R-07	-1082.16	-299.419	-1381.58
TCGA-QH-A65X-01A-11R-A32Q-07	-937.27	-107.874	-1045.14
TCGA-QH-A65Z-01A-11R-A29R-07	-1378.81	-782.899	-2161.71
TCGA-QH-A6CS-01A-11R-A31N-07	-570.026	118.736	-451.29
TCGA-QH-A6CU-01A-11R-A31N-07	-762.616	100.938	-661.678
TCGA-QH-A6CV-01A-11R-A31N-07	-658.031	559.754	-98.278
TCGA-QH-A6CW-01A-11R-A32Q-07	-908.517	163.885	-744.632
TCGA-QH-A6CX-01A-11R-A32Q-07	-527.288	386.795	-140.493
TCGA-QH-A6CY-01A-11R-A32Q-07	-1225.59	-769.493	-1995.09
TCGA-QH-A6CZ-01A-11R-A32Q-07	-1319.51	-1037.12	-2356.63
TCGA-QH-A6X3-01A-21R-A32Q-07	-1035.13	-271.323	-1306.46
TCGA-QH-A6X4-01A-51R-A32Q-07	-1583.94	-675.545	-2259.49
TCGA-QH-A6X5-01A-12R-A32Q-07	-1162.02	-531.982	-1694.01
TCGA-QH-A6X8-01A-12R-A32Q-07	-1260.27	-504.047	-1764.31
TCGA-QH-A6X9-01A-12R-A32Q-07	-1167.37	-642.376	-1809.74
TCGA-QH-A6XA-01A-12R-A32Q-07	-927.616	-216.813	-1144.43
TCGA-QH-A6XC-01A-12R-A32Q-07	-839.135	-231.907	-1071.04
TCGA-QH-A86X-01A-11R-A36H-07	-1324.89	-704.438	-2029.32
TCGA-QH-A870-01A-11R-A36H-07	-1252.29	-537.969	-1790.26
TCGA-R8-A6MK-01A-11R-A32Q-07	-1265.69	-536.129	-1801.82
TCGA-R8-A6ML-01A-11R-A32Q-07	-1542.09	-910.125	-2452.21
TCGA-R8-A6MO-01A-11R-A33Z-07	-1142.81	-163.489	-1306.29
TCGA-R8-A73M-01A-11R-A32Q-07	-1520.9	-886.863	-2407.77
TCGA-RY-A83X-01A-11R-A36H-07	-1412.99	-880.803	-2293.79
TCGA-RY-A83Y-01A-11R-A36H-07	-1191.86	-59.5027	-1251.37
TCGA-RY-A83Z-01A-11R-A36H-07	-1438.09	-19.6825	-1457.78
TCGA-RY-A840-01A-11R-A36H-07	-1536.16	-734.967	-2271.13
TCGA-RY-A843-01A-11R-A36H-07	-1096.15	-400.376	-1496.52
TCGA-RY-A845-01A-11R-A36H-07	-1147.29	-389.626	-1536.91
TCGA-RY-A847-01A-11R-A36H-07	-765.482	115.131	-650.351
TCGA-S9-A6TS-01A-12R-A33Z-07	-961.463	-5.11768	-966.581
TCGA-S9-A6TU-01A-12R-A32Q-07	-683.316	379.618	-303.697
TCGA-S9-A6TV-01A-12R-A34R-07	-39.5914	1111.47	1071.88
TCGA-S9-A6TW-01A-12R-A32Q-07	-785.75	-366.258	-1152.01
TCGA-S9-A6TX-01A-21R-A32Q-07	-1156.44	-523.335	-1679.77
TCGA-S9-A6TY-01A-12R-A32Q-07	-1676.01	-1339.61	-3015.62
TCGA-S9-A6TZ-01A-21R-A32Q-07	-683.322	12.0023	-671.32
TCGA-S9-A6U0-01A-12R-A32Q-07	284.282	1184.18	1468.46
TCGA-S9-A6U1-01A-21R-A33Z-07	-950.035	-139.517	-1089.55
TCGA-S9-A6U2-01A-21R-A33Z-07	-818.377	-317.981	-1136.36
TCGA-S9-A6U5-01A-12R-A33Z-07	-998.709	367.413	-631.296
TCGA-S9-A6U6-01A-12R-A33Z-07	-1075.88	-365.323	-1441.21
TCGA-S9-A6U8-01A-21R-A33Z-07	-741.16	258.574	-482.586
TCGA-S9-A6U9-01A-11R-A32Q-07	-259.937	721.059	461.121
TCGA-S9-A6UA-01A-12R-A33Z-07	430.874	1512.6	1943.47
TCGA-S9-A6UB-01A-21R-A33Z-07	-1600.53	-1108.67	-2709.2
TCGA-S9-A6WD-01A-12R-A33Z-07	-1419.51	-849.363	-2268.87
TCGA-S9-A6WE-01A-12R-A33Z-07	-1149.11	-524.79	-1673.9
TCGA-S9-A6WG-01A-11R-A33Z-07	406.36	855.363	1261.72
TCGA-S9-A6WH-01A-12R-A33Z-07	-1452.64	-734.176	-2186.82
TCGA-S9-A6WI-01A-21R-A33Z-07	-1088.5	-1139.57	-2228.07
TCGA-S9-A6WL-01A-21R-A33Z-07	-715.179	-783.133	-1498.31
TCGA-S9-A6WM-01A-12R-A33Z-07	-532.359	-280.547	-812.906
TCGA-S9-A6WN-01A-12R-A33Z-07	-242.133	948.749	706.616
TCGA-S9-A6WO-01A-21R-A34F-07	-960.198	304.24	-655.958
TCGA-S9-A6WP-01A-12R-A34F-07	-981.666	149.273	-832.393
TCGA-S9-A6WQ-01A-12R-A34F-07	-713.341	495.846	-217.496
TCGA-S9-A7IQ-01A-21R-A34F-07	-1365.81	-1400.71	-2766.52
TCGA-S9-A7IS-01A-11R-A34F-07	-1286.73	-452.702	-1739.43
TCGA-S9-A7IX-01A-12R-A34F-07	-269.227	481.643	212.416
TCGA-S9-A7IY-01A-11R-A34F-07	-822.648	382.915	-439.733
TCGA-S9-A7IZ-01A-11R-A34F-07	-789.584	60.9222	-728.662
TCGA-S9-A7J0-01A-11R-A34F-07	-1564.73	-737.338	-2302.06
TCGA-S9-A7J1-01A-21R-A34R-07	-998.691	-415.126	-1413.82
TCGA-S9-A7J2-01A-11R-A34F-07	-1376.02	-920.906	-2296.93
TCGA-S9-A7J3-01A-21R-A34R-07	-1171.41	-308.589	-1480
TCGA-S9-A7QW-01A-11R-A34F-07	-1492.63	-931.699	-2424.33
TCGA-S9-A7QX-01A-11R-A34F-07	-1096.3	152.046	-944.256
TCGA-S9-A7QY-01A-11R-A34F-07	-1369.61	-825.908	-2195.52
TCGA-S9-A7QZ-01A-12R-A34R-07	-1477.03	-1202.61	-2679.63
TCGA-S9-A7R1-01A-12R-A34R-07	-1315.36	-991.584	-2306.94
TCGA-S9-A7R2-01A-21R-A34R-07	-299.3	942.815	643.515
TCGA-S9-A7R3-01A-11R-A34R-07	-778.731	143.858	-634.873
TCGA-S9-A7R4-01A-12R-A34R-07	-113.246	293.943	180.697
TCGA-S9-A7R7-01A-11R-A34R-07	279.863	1096.83	1376.69
TCGA-S9-A7R8-01A-11R-A34R-07	-847.947	242.211	-605.736
TCGA-S9-A89V-01A-11R-A36H-07	-741.636	1.56327	-740.073
TCGA-S9-A89Z-01A-11R-A36H-07	-315.488	800.562	485.074
TCGA-TM-A7C3-01A-11R-A32Q-07	-1056.47	-653.82	-1710.29
TCGA-TM-A7C4-01A-11R-A32Q-07	-1283.95	-1053.17	-2337.12
TCGA-TM-A7C5-01A-11R-A32Q-07	-1351.51	-824.536	-2176.05
TCGA-TM-A7CA-01A-21R-A33Z-07	-1316.83	-678.559	-1995.39
TCGA-TM-A7CF-01A-11R-A32Q-07	-1397.36	-1001.52	-2398.88
TCGA-TM-A84B-01A-11R-A36H-07	-883.903	-769.331	-1653.23
TCGA-TM-A84C-01A-11R-A36H-07	-362.88	375.962	13.0814
TCGA-TM-A84F-01A-11R-A36H-07	-271.241	1400.72	1129.48
TCGA-TM-A84G-01A-11R-A36H-07	-1626.16	-1202.48	-2828.64
TCGA-TM-A84H-01A-11R-A36H-07	-1414.34	-623.259	-2037.6
TCGA-TM-A84I-01A-11R-A36H-07	-1182.26	-287.08	-1469.34
TCGA-TM-A84J-01A-11R-A36H-07	-958.071	-872.685	-1830.76
TCGA-TM-A84L-01A-11R-A36H-07	-565.544	345.845	-219.699
TCGA-TM-A84M-01A-11R-A36H-07	-1633.99	-1043.33	-2677.32
TCGA-TM-A84O-01A-11R-A36H-07	-969.698	-315.089	-1284.79
TCGA-TM-A84Q-01A-11R-A36H-07	-633.24	505.538	-127.702
TCGA-TM-A84R-01A-21R-A36H-07	-1236.82	-1218.05	-2454.87
TCGA-TM-A84S-01A-11R-A36H-07	-996.733	-237.911	-1234.64
TCGA-TM-A84T-01A-11R-A36H-07	-991.944	-102.242	-1094.19
TCGA-TQ-A7RF-01A-11R-A33Z-07	-1180.36	-153.068	-1333.43
TCGA-TQ-A7RG-01A-11R-A33Z-07	-1001.29	-251.453	-1252.74
TCGA-TQ-A7RH-01A-12R-A34F-07	-703.24	349.158	-354.082
TCGA-TQ-A7RI-01A-11R-A33Z-07	-1218.39	-378.589	-1596.98
TCGA-TQ-A7RJ-01A-11R-A33Z-07	-947.745	126.648	-821.097
TCGA-TQ-A7RK-02A-11R-A36H-07	-934.057	-54.18	-988.237
TCGA-TQ-A7RM-01A-11R-A33Z-07	-1397.5	-1199.21	-2596.7
TCGA-TQ-A7RN-01A-11R-A33Z-07	-1371.97	-797.289	-2169.26
TCGA-TQ-A7RO-01A-11R-A33Z-07	-1351.4	-733.979	-2085.38
TCGA-TQ-A7RP-01A-21R-A34F-07	-499.484	-117.732	-617.216
TCGA-TQ-A7RQ-01A-11R-A33Z-07	-1562.2	-1344.49	-2906.69
TCGA-TQ-A7RR-01A-21R-A34F-07	-826.299	52.8135	-773.486
TCGA-TQ-A7RV-02A-11R-A36H-07	-486.083	-2.16895	-488.252
TCGA-TQ-A7RW-01A-11R-A33Z-07	-535.391	685.939	150.548
TCGA-TQ-A8XE-02A-11R-A36H-07	-642.337	362.672	-279.665
TCGA-VM-A8C8-01A-11R-A36H-07	-877.929	54.8692	-823.06
TCGA-VM-A8C9-01A-11R-A36H-07	-96.6239	1313.83	1217.2
TCGA-VM-A8CA-01A-11R-A36H-07	-580.411	116.974	-463.436
TCGA-VM-A8CB-01A-11R-A36H-07	-1590.17	-847.908	-2438.08
TCGA-VM-A8CD-01A-11R-A36H-07	-506.488	427.421	-79.0669
TCGA-VM-A8CE-01A-11R-A36H-07	-971.949	-551.67	-1523.62
TCGA-VM-A8CF-01A-11R-A36H-07	-496.985	976.175	479.189
TCGA-VM-A8CH-01A-12R-A36H-07	-785.666	270.533	-515.133
TCGA-VV-A829-01A-21R-A36H-07	-935.517	-13.7544	-949.271
TCGA-VV-A86M-01A-11R-A36H-07	-953.601	273.112	-680.488
TCGA-VW-A7QS-01A-12R-A33Z-07	-1328.23	-825.335	-2153.56
TCGA-VW-A8FI-01A-11R-A36H-07	-837.85	375.54	-462.311
TCGA-W9-A837-01A-11R-A36H-07	-1362.11	-1038.18	-2400.29
TCGA-WH-A86K-01A-11R-A36H-07	-958.321	-118.328	-1076.65
TCGA-WY-A858-01A-11R-A36H-07	-137.35	981.36	844.009
TCGA-WY-A859-01A-12R-A36H-07	-1383.51	-1189.02	-2572.54
TCGA-WY-A85A-01A-21R-A36H-07	-1188.92	-241.053	-1429.97
TCGA-WY-A85B-01A-11R-A36H-07	-716.314	522.747	-193.567
TCGA-WY-A85C-01A-11R-A36H-07	-1053.78	-165.705	-1219.48
TCGA-WY-A85D-01A-11R-A36H-07	-1010.83	47.1932	-963.636
TCGA-WY-A85E-01A-11R-A36H-07	-1421.12	-856.873	-2277.99

## Sheet: Table 2
DEGs based on immune score								DEGs based on stromal score
Gene	low-score	high-score	logFC	p-value	FDR			Gene	low-score	high-score	logFC	p-value	FDR
ALOX15P1	0.208115	0.100004	-1.05733	5.85932e-13	2.88447e-12			LARS2-AS1	0.164978	0.0718957	-1.1983	3.2706e-08	9.34855e-08
LARS2-AS1	0.166084	0.0707858	-1.23038	1.64956e-06	4.08789e-06			CCL19	0.981459	2.34887	1.25896	5.17442e-10	1.82725e-09
CCL19	1.08658	2.24335	1.04587	3.34956e-06	8.01592e-06			JHY	0.196242	0.659461	1.74866	4.19244e-10	1.49667e-09
KIF12	0.255347	0.0780536	-1.70992	1.63105e-12	7.75245e-12			AC093117.1	0.0714329	0.142933	1.00068	3.08054e-17	2.47353e-16
AC009487.2	0.338465	0.0873891	-1.95348	1.83453e-11	7.85393e-11			AC010319.1	0.0701921	0.150017	1.09574	8.91394e-20	9.46382e-19
SELPLG	10.8506	27.3728	1.33497	4.86952e-50	3.38559e-48			PRLR	0.0296659	0.171998	2.53552	0.000546517	0.000911353
CD74	97.8052	454.559	2.21648	4.75951e-63	7.31605e-61			AC009487.2	0.292504	0.133525	-1.13135	3.67502e-05	7.15218e-05
IFI30	0.0794835	0.269686	1.76256	1.19607e-40	5.50435e-39			SELPLG	12.2883	25.9296	1.07731	1.42686e-32	5.16563e-31
CISH	0.236965	0.57068	1.26801	2.54365e-42	1.27442e-40			CD74	100.882	451.47	2.16195	8.74832e-61	2.49808e-57
TMEM151B	14.7557	4.93884	-1.57903	3.77397e-34	1.15395e-32			IFI30	0.0859883	0.263157	1.61371	5.03824e-29	1.31837e-27
MRGPRF	0.922122	2.45574	1.41313	2.23644e-18	1.83829e-17			CISH	0.211948	0.595792	1.4911	5.73784e-41	3.90105e-39
AC026790.1	0.891423	0.294204	-1.59929	4.75858e-25	6.92368e-24			TMEM151B	13.8044	5.89377	-1.22786	5.83348e-24	9.49146e-23
TAGLN3	57.2945	24.7661	-1.21003	4.2447e-27	7.27166e-26			MRGPRF	0.913061	2.46484	1.43271	3.44636e-23	5.18293e-22
BCL2A1	0.595086	2.96711	2.31789	2.66111e-41	1.26324e-39			AC026790.1	0.852929	0.332844	-1.35758	8.03892e-22	1.05845e-20
AC022559.1	0.899896	0.220148	-2.03129	0.00197011	0.00325057			BCL2A1	0.616863	2.94525	2.25537	7.15743e-39	4.30275e-37
AC112236.1	0.185981	0.07333	-1.34268	4.9984e-08	1.47852e-07			AC022559.1	0.892442	0.22763	-1.97107	0.00462772	0.00678882
B4GALT1	3.17268	6.52757	1.04085	2.2116e-59	2.31358e-57			AC112236.1	0.184848	0.0744668	-1.31167	1.83404e-08	5.40116e-08
AC110995.1	0.510919	1.35956	1.41197	3.50434e-48	2.26889e-46			B4GALT1	3.18729	6.5129	1.03097	2.4167e-51	5.25782e-49
RHBDF2	2.48276	7.25099	1.54623	2.78377e-63	4.36819e-61			AC110995.1	0.586986	1.2832	1.12835	2.58742e-31	8.40784e-30
DLGAP3	6.89903	2.88754	-1.25655	1.7188e-25	2.59266e-24			RHBDF2	2.93367	6.79837	1.21248	2.03209e-41	1.45978e-39
PTER	4.55761	1.80207	-1.33862	1.00015e-05	2.26333e-05			AC021683.2	0.196638	0.0939733	-1.06522	1.63286e-07	4.28651e-07
AC021683.2	0.222143	0.0683718	-1.70001	1.20556e-17	9.29719e-17			AC120498.3	0.166599	0.0771214	-1.11117	2.45466e-07	6.31112e-07
LCP1	3.53868	10.9674	1.63194	1.57048e-68	4.54955e-66			LCP1	3.98543	10.519	1.40018	2.39597e-51	5.25782e-49
TRPC5	0.19999	0.0846195	-1.24087	9.29392e-12	4.09367e-11			SNAP25	147.316	61.9917	-1.24876	1.55962e-15	1.02852e-14
SNAP25	166.122	43.1141	-1.94601	1.76898e-27	3.12524e-26			TRPV4	0.189033	0.495167	1.38928	3.25497e-19	3.25982e-18
RPL31P44	0.0731017	0.153295	1.06833	8.30898e-13	4.03589e-12			GGTLC4P	0.08995	0.181765	1.01488	1.00515e-08	3.04692e-08
CNTNAP2	7.62333	2.96978	-1.36006	3.0951e-27	5.36326e-26			CD300LF	0.425057	1.22563	1.52779	1.24524e-37	6.70904e-36
FBXL16	61.2597	24.7809	-1.30571	1.7243e-24	2.38739e-23			LEFTY2	1.12575	2.95566	1.39259	1.17375e-23	1.86081e-22
GGTLC4P	0.0862227	0.185506	1.10533	4.54727e-11	1.86581e-10			AC062021.1	12.9167	4.80076	-1.4279	6.21084e-20	6.69879e-19
RIIAD1	1.05811	0.5064	-1.06314	2.61204e-25	3.883e-24			F13A1	0.87936	6.91608	2.97543	7.25715e-29	1.88818e-27
AC243829.1	0.257814	0.117667	-1.13161	6.19745e-14	3.37847e-13			MAS1	0.200963	0.0859829	-1.22481	1.84978e-06	4.24731e-06
CD300LF	0.375287	1.27558	1.76509	9.14756e-51	6.54108e-49			OSMR	1.45502	4.68794	1.68791	2.80982e-38	1.56938e-36
LEFTY2	1.02091	3.0609	1.5841	5.68359e-32	1.46438e-30			LINC01771	0.328735	0.137438	-1.25814	1.87371e-18	1.75207e-17
AC062021.1	12.0343	5.68651	-1.08153	1.5862e-14	9.16669e-14			CUX2	4.00477	1.78763	-1.16367	1.56039e-22	2.21401e-21
F13A1	1.07212	6.72259	2.64855	4.48894e-17	3.28578e-16			C2	0.680433	2.36087	1.79479	9.8601e-45	9.46404e-43
SLC14A1	9.29358	19.6252	1.0784	1.40353e-07	3.9367e-07			AC024563.1	0.156283	0.0583659	-1.42096	8.77109e-18	7.50157e-17
MAS1	0.231404	0.0554265	-2.06177	9.52837e-15	5.6259e-14			IGKV1-5	0.14427	2.68055	4.21568	1.7721e-10	6.62985e-10
PCDH8	3.528	1.35567	-1.37984	3.08759e-22	3.52181e-21			IGF2BP2	0.593313	1.40338	1.24204	1.8394e-16	1.35197e-15
OSMR	1.75125	4.3906	1.32603	6.01603e-20	5.65467e-19			MIR4269	0.537863	0.251733	-1.09534	0.0002343	0.000410142
LINC01771	0.352499	0.113584	-1.63386	5.74311e-29	1.15455e-27			TLR6	0.374607	0.960389	1.35824	4.36071e-44	3.89125e-42
CUX2	4.29165	1.49967	-1.51688	3.13916e-31	7.57825e-30			ADAMTS3	0.272773	0.555677	1.02655	0.000942208	0.00152122
C2	0.641772	2.39968	1.90271	7.7316e-52	5.78487e-50			LINC01765	0.0249149	0.478174	4.26245	7.8546e-09	2.40943e-08
AC024563.1	0.157254	0.0573909	-1.45421	1.1712e-18	9.83079e-18			FEZF1-AS1	0.249926	0.527816	1.07854	0.00147938	0.00232867
GABRG3	0.338738	0.119757	-1.50006	3.25843e-11	1.35769e-10			MILR1	1.25286	3.64574	1.54099	5.20344e-53	1.4675e-50
IGKV1-5	0.111129	2.71381	4.61002	5.01949e-11	2.04804e-10			IQGAP1	4.13629	9.14384	1.14446	9.29508e-41	6.22688e-39
MIR4269	0.607225	0.182108	-1.73743	7.70362e-10	2.78113e-09			LRRC37A6P	0.301038	0.667961	1.14982	3.81453e-21	4.64e-20
TLR6	0.333935	1.00122	1.58412	3.51588e-59	3.66105e-57			DNAH5	0.148248	0.345151	1.21922	4.06991e-08	1.15009e-07
KCNK1	6.88646	3.37382	-1.02938	1.47686e-11	6.37886e-11			CYTOR	0.359652	0.992656	1.46469	3.31945e-12	1.50665e-11
APOC1	50.8344	102.722	1.01486	7.62741e-22	8.40726e-21			SULT4A1	20.1838	8.90026	-1.18128	1.77248e-08	5.22727e-08
MILR1	1.12326	3.77583	1.7491	8.19124e-71	3.24718e-68			SIGLEC7	0.360155	1.07197	1.57358	2.47745e-38	1.39054e-36
RGS19	5.13489	10.5332	1.03653	4.76256e-60	5.40778e-58			LINC02339	0.152429	0.0598871	-1.34782	4.51195e-12	2.02179e-11
AP001972.3	0.251607	0.0964134	-1.38387	5.49717e-10	2.01026e-09			HMGA1P7	2.50653	0.81537	-1.62017	1.03437e-21	1.34256e-20
GPR61	0.884726	0.338992	-1.38398	5.18465e-28	9.60264e-27			SMIM18	7.23938	3.42832	-1.07836	4.04471e-26	8.14794e-25
LINGO4	0.185227	0.0709963	-1.38348	1.36517e-11	5.91604e-11			NPM2	4.33414	2.1601	-1.00465	4.74265e-06	1.03745e-05
LINC00943	0.748488	0.27469	-1.44618	7.44989e-21	7.61709e-20			MMRN1	0.345904	0.974487	1.49427	6.36952e-26	1.24683e-24
CYTOR	0.446313	0.905667	1.02093	0.000108894	0.000214802			C5orf49	1.14288	3.05276	1.41744	0.00186473	0.00289152
SULT4A1	22.9952	6.07821	-1.91961	2.04187e-16	1.40794e-15			COL14A1	0.621431	2.14391	1.78658	3.68918e-28	9.03276e-27
TAC3	2.21009	0.836473	-1.40172	1.91164e-11	8.16703e-11			AC015660.4	0.113562	0.245256	1.11081	6.09513e-17	4.69761e-16
SIGLEC7	0.311554	1.12076	1.84692	2.38415e-53	1.92401e-51			DKK1	0.378001	1.97176	2.38302	0.00417481	0.00616319
LINC02339	0.156279	0.0560223	-1.48005	7.13809e-16	4.69966e-15			ISLR	3.33185	8.22532	1.30375	3.78308e-09	1.20548e-08
AL359853.1	0.254886	0.0717727	-1.82835	1.51795e-13	7.95258e-13			TMEM156	0.830202	1.88444	1.1826	1.86535e-31	6.16674e-30
HMGA1P7	2.52007	0.801776	-1.6522	7.45044e-22	8.22022e-21			CYSLTR1	0.20255	0.4554	1.16885	1.47074e-36	7.30381e-35
AP001350.2	0.904928	2.01457	1.1546	1.26239e-30	2.88132e-29			FAM129A	0.772435	3.06324	1.98757	1.40668e-53	4.59061e-51
NPM2	4.77001	1.72257	-1.46943	3.53186e-10	1.31824e-09			TSPAN2	0.222489	0.520109	1.22508	3.72933e-06	8.25992e-06
MMRN1	0.368921	0.951383	1.36671	6.58583e-23	7.97072e-22			AC124798.1	2.52802	1.25712	-1.00788	6.03228e-26	1.18285e-24
COL14A1	0.877302	1.88707	1.105	1.07297e-15	6.96288e-15			CSF2RB	0.36389	1.15098	1.66128	7.7812e-53	2.11612e-50
AC015660.4	0.0963965	0.262486	1.44519	2.57114e-27	4.47592e-26			IQSEC3	5.86734	2.65943	-1.14159	8.27997e-19	8.02153e-18
TMEM156	0.718668	1.99639	1.474	9.36053e-50	6.3708e-48			TESPA1	4.2024	1.38614	-1.60014	0.00974497	0.0136105
CYSLTR1	0.218999	0.438889	1.00293	2.76554e-37	1.05558e-35			MT1H	0.427124	1.03251	1.27342	0.00225471	0.00345659
AC092903.1	0.304848	0.0944972	-1.68975	1.23214e-10	4.81852e-10			LINC00840	0.0872782	0.219138	1.32814	8.95533e-12	3.87968e-11
FAM129A	0.958606	2.87637	1.58524	2.131e-32	5.712e-31			FRRS1	0.0771227	0.232889	1.59441	4.96093e-28	1.20305e-26
AC124798.1	2.57404	1.21093	-1.08791	1.05641e-30	2.4333e-29			ITGAL	0.636716	2.26675	1.83191	5.53226e-53	1.54121e-50
CSF2RB	0.335325	1.17965	1.81473	4.02683e-64	6.69046e-62			TNFSF8	0.314213	0.997745	1.66693	2.00833e-50	3.72994e-48
IQSEC3	6.65212	1.87168	-1.82948	6.6428e-33	1.84626e-31			TGM5	0.121125	0.36322	1.58435	2.25086e-15	1.45579e-14
TESPA1	4.92272	0.663085	-2.89219	7.53715e-09	2.44771e-08			AC092131.1	0.556559	1.57565	1.50134	7.98477e-21	9.40713e-20
FRRS1	0.0828763	0.227113	1.45438	2.33552e-22	2.70079e-21			AC018358.1	0.562752	0.220864	-1.34934	4.14523e-07	1.03536e-06
ITGAL	0.576241	2.32746	2.01401	1.09714e-65	2.1939e-63			AC015961.1	0.326247	0.155111	-1.07267	1.06927e-20	1.24371e-19
TNFSF8	0.278243	1.03385	1.89361	1.8767e-64	3.21257e-62			CRB2	2.54999	7.75919	1.60541	5.88862e-27	1.28604e-25
TGM5	0.12557	0.358758	1.51452	2.15178e-13	1.10882e-12			FAM153B	0.15037	0.0667485	-1.17171	5.17124e-08	1.44151e-07
AC092131.1	0.501809	1.63061	1.7002	6.0612e-30	1.30189e-28			NYAP2	0.383494	0.155842	-1.29912	3.32978e-18	3.02087e-17
AC018358.1	0.667071	0.11615	-2.52186	6.45627e-14	3.51194e-13			OR52K3P	0.0943749	0.372197	1.97959	8.88734e-31	2.7288e-29
AC015961.1	0.346803	0.134477	-1.36676	6.28685e-30	1.34907e-28			CHRNA9	0.0913438	0.757076	3.05106	4.91941e-13	2.44941e-12
CRB2	2.87719	7.43076	1.36885	4.65088e-18	3.70301e-17			RNF135	1.59354	3.68285	1.20858	5.40341e-48	7.135e-46
FAM153B	0.168923	0.0481252	-1.8115	2.65149e-14	1.49783e-13			KLK7	0.953924	0.444161	-1.10279	1.5796e-06	3.65745e-06
NYAP2	0.407342	0.131903	-1.62677	2.90412e-28	5.49133e-27			MIR4420	0.102297	0.274301	1.423	7.44397e-09	2.28716e-08
OR52K3P	0.0871616	0.379438	2.1221	5.56161e-36	1.93935e-34			CFAP300	0.672173	1.47572	1.13452	3.65494e-09	1.16676e-08
AC243836.1	0.0948702	0.241889	1.35032	1.18212e-33	3.47801e-32			CTLA4	0.0759916	0.210786	1.47187	7.68422e-23	1.12093e-21
CHRNA9	0.15216	0.69603	2.19356	3.1401e-07	8.50867e-07			ITGA3	2.71077	5.6847	1.06838	1.00094e-15	6.76291e-15
RNF135	1.63598	3.64025	1.15388	9.19564e-49	6.02274e-47			CMPK2	1.27182	2.80325	1.14021	2.94164e-11	1.20385e-10
ARHGAP6	0.989473	1.99272	1.01001	6.10598e-29	1.22641e-27			GABRA1	7.75145	3.37743	-1.19854	2.98576e-09	9.62285e-09
KLK7	1.13718	0.260206	-2.12774	1.94954e-11	8.31951e-11			HOXB4	0.14862	0.405164	1.44688	1.67175e-23	2.5997e-22
MIR4420	0.0879956	0.288656	1.71385	1.31294e-13	6.92512e-13			NUDT16P1	0.195219	0.453457	1.21587	1.07841e-33	4.24013e-32
CFAP300	0.677306	1.47057	1.11849	2.78081e-09	9.46457e-09			STRA6	0.201533	0.573004	1.50753	4.63055e-05	8.89059e-05
AC117500.5	0.168001	0.0821017	-1.03299	1.16152e-08	3.69033e-08			G6PC2	0.499641	0.115914	-2.10784	1.56554e-19	1.61898e-18
CTLA4	0.077073	0.2097	1.44403	5.37991e-20	5.08638e-19			APCDD1L	0.0241522	0.45896	4.24814	2.31653e-05	4.63023e-05
CMPK2	1.35086	2.72391	1.0118	0.0131565	0.0191008			RAB3C	6.62269	3.02496	-1.1305	1.5037e-19	1.55784e-18
GABRA1	9.03075	2.09327	-2.10909	6.04671e-19	5.20302e-18			C1orf162	2.84595	6.78203	1.25281	3.13095e-37	1.62923e-35
FAM87B	0.0909348	0.190342	1.06569	1.47513e-22	1.73605e-21			DENND2D	0.262021	0.888106	1.76105	2.23692e-49	3.47621e-47
FRMPD4	1.62818	0.487458	-1.73992	2.42757e-14	1.37753e-13			SIGLEC9	0.776647	2.51812	1.69702	5.86021e-52	1.42416e-49
PNMA6B	0.395386	0.167075	-1.24277	3.07524e-05	6.53329e-05			ASPN	0.261992	0.772031	1.55914	2.12987e-19	2.17306e-18
LINC02282	0.556559	0.238246	-1.22408	2.0383e-18	1.67909e-17			LRAT	0.335457	1.31928	1.97555	3.41161e-31	1.09767e-29
NUDT16P1	0.186874	0.461835	1.30531	2.65723e-43	1.39311e-41			PAX5	0.204547	0.0750753	-1.44603	1.01967e-10	3.92675e-10
G6PC2	0.50358	0.11196	-2.16923	1.41722e-17	1.08628e-16			Z94057.1	0.642565	0.309522	-1.0538	3.05839e-21	3.75825e-20
PTPRT	6.78345	3.32065	-1.03055	1.69584e-23	2.15762e-22			AC108463.1	0.232415	0.655033	1.49487	1.2745e-10	4.85569e-10
RAB3C	7.42352	2.2211	-1.74083	1.78598e-32	4.8215e-31			ATCAY	62.3446	29.0311	-1.10267	2.35503e-28	5.85399e-27
C1orf162	2.31556	7.31442	1.65938	4.28787e-66	9.14045e-64			TMEM176B	11.0465	30.1106	1.44668	2.78581e-37	1.45627e-35
DENND2D	0.258146	0.891996	1.78885	1.55697e-51	1.14225e-49			SRRM3	6.56973	3.12244	-1.07316	1.96075e-25	3.6835e-24
SIGLEC9	0.673352	2.62181	1.96113	1.0254e-71	4.63397e-69			CAV1	5.7631	13.5778	1.23633	1.83786e-21	2.32727e-20
LRAT	0.395335	1.25917	1.67133	4.57118e-28	8.52232e-27			AL355601.1	0.0303568	0.250022	3.04197	1.32263e-09	4.44586e-09
PAX5	0.204222	0.0754017	-1.43747	1.15253e-19	1.05436e-18			LINC02192	0.295691	0.123521	-1.25933	2.79162e-07	7.1333e-07
ATCAY	63.4213	27.9503	-1.1821	2.85259e-32	7.55653e-31			AC132938.1	2.23155	1.07694	-1.05111	1.34377e-23	2.11121e-22
TMEM176B	12.5603	28.591	1.18669	1.21342e-30	2.77515e-29			WDR78	0.433075	1.25547	1.53554	2.00359e-27	4.58618e-26
SRRM3	6.55714	3.13509	-1.06456	1.15123e-26	1.91697e-25			TUNAR	1.83465	0.885339	-1.0512	4.46329e-12	2.00195e-11
CAV1	5.48171	13.8603	1.33826	1.07094e-17	8.30726e-17			IGKV1D-8	0.237664	0.106691	-1.15548	3.7704e-11	1.52579e-10
AL355601.1	0.0787914	0.201404	1.35398	1.06249e-09	3.7687e-09			CDHR1	10.8934	4.98566	-1.1276	1.43687e-31	4.78481e-30
LINC02192	0.336961	0.0820945	-2.03722	2.9306e-15	1.82123e-14			IGHV3-15	0.117336	1.09011	3.21576	2.57509e-10	9.45443e-10
WDR78	0.46695	1.22146	1.38727	2.88364e-28	5.45717e-27			LILRA5	0.0773091	0.218544	1.49921	3.17786e-19	3.18679e-18
TUNAR	2.15697	0.561795	-1.94089	5.5097e-25	7.95508e-24			KRT17	1.24864	0.524926	-1.25017	2.29028e-05	4.58105e-05
CD72	0.338937	0.693271	1.0324	8.23784e-19	7.01894e-18			DLX3	0.236854	0.113214	-1.06495	5.48923e-14	3.07343e-13
IGKV1D-8	0.248115	0.0962002	-1.3669	2.66697e-11	1.1195e-10			ITPRID1	0.0161568	0.434405	4.74883	0.000485116	0.000814913
CDHR1	10.7103	5.16944	-1.05093	1.23578e-25	1.88674e-24			WISP1	0.189392	0.997349	2.39673	2.8138e-08	8.1129e-08
IGHV3-15	0.15653	1.05077	2.74694	1.09339e-08	3.48615e-08			CATIP	0.0827058	0.300924	1.86334	3.13956e-09	1.00943e-08
LILRA5	0.0807777	0.215062	1.41272	5.32941e-14	2.92503e-13			CEACAM21	0.56661	1.34099	1.24287	6.52223e-36	3.11052e-34
KRT17	1.27384	0.499624	-1.35027	5.80681e-08	1.70431e-07			LINC01127	0.0809054	0.195329	1.27159	1.06303e-13	5.72331e-13
PAK1	13.2183	5.82987	-1.181	1.0415e-06	2.64128e-06			HSD3B7	1.24426	2.54731	1.03368	3.87961e-30	1.12469e-28
DLX3	0.266754	0.0832011	-1.68083	1.21676e-19	1.10907e-18			TRIM6	0.205012	0.450657	1.13632	1.19087e-24	2.07349e-23
P2RY12	17.694	40.0871	1.17988	2.5081e-24	3.42436e-23			TREM2	22.4968	65.1634	1.53434	2.47748e-46	2.77429e-44
AL035425.3	0.159001	0.0598215	-1.4103	1.10449e-06	2.79411e-06			AC141557.2	0.783592	0.325785	-1.26618	1.42235e-10	5.39019e-10
AC010931.2	0.229183	0.0859425	-1.41505	1.66469e-09	5.79232e-09			SLC16A3	1.10639	2.92705	1.40359	3.16386e-42	2.42534e-40
CATIP	0.0886603	0.294947	1.73409	1.56126e-09	5.44586e-09			SUSD3	2.29638	5.89825	1.36093	3.24728e-37	1.68593e-35
CEACAM21	0.481041	1.42689	1.56864	1.23559e-58	1.26332e-56			PACSIN1	24.3546	10.7875	-1.17483	1.63287e-07	4.28651e-07
LINC01127	0.0810039	0.19523	1.26911	7.75846e-14	4.19101e-13			TRBV28	0.0833983	0.456019	2.451	1.48914e-32	5.36559e-31
HSD3B7	1.24839	2.54316	1.02655	2.02766e-30	4.5229e-29			NAMPTP1	0.532038	1.29693	1.2855	9.46311e-12	4.08572e-11
TREM2	18.9198	68.7539	1.86154	1.49399e-68	4.38418e-66			SHC3	19.5693	9.03738	-1.11462	9.90116e-09	3.00295e-08
AC141557.2	0.763195	0.346259	-1.1402	1.05663e-05	2.38375e-05			CNGA3	2.25496	5.12661	1.1849	4.25014e-05	8.19742e-05
SLC16A3	1.01582	3.01796	1.57093	5.84009e-61	7.17188e-59			MPZL2	0.209852	0.563408	1.42481	1.08692e-17	9.19279e-17
AL365205.3	1.19496	0.571209	-1.06487	1.56381e-12	7.44539e-12			IL16	0.41004	1.01631	1.3095	9.42994e-49	1.32974e-46
SUSD3	2.05489	6.14065	1.57933	3.74802e-51	2.70576e-49			STAB1	4.98107	10.9061	1.1306	2.83542e-24	4.75569e-23
PACSIN1	28.3486	6.77846	-2.06425	1.28781e-14	7.49406e-14			AL353746.1	0.276028	0.135356	-1.02806	4.23475e-05	8.1705e-05
ST6GALNAC5	1.89968	0.721393	-1.3969	2.56172e-13	1.30931e-12			CNTF	0.622068	1.3636	1.13228	2.52692e-19	2.55307e-18
AC084064.1	0.0820147	0.170109	1.0525	1.99733e-05	4.34879e-05			KMO	0.0647966	0.173411	1.4202	8.81565e-10	3.03017e-09
SIAH3	0.306909	0.116133	-1.40203	1.65457e-09	5.758e-09			DPYD	0.9605	2.98602	1.63637	1.08365e-35	5.06234e-34
MIR137HG	0.27599	0.104282	-1.40413	4.5221e-18	3.60174e-17			PTPN6	2.28363	5.76933	1.33708	6.32806e-51	1.30233e-48
TRBV28	0.0949438	0.444429	2.22681	7.78819e-22	8.57611e-21			CXCR4	8.16664	17.1553	1.07084	7.58094e-27	1.63685e-25
NAMPTP1	0.582127	1.24665	1.09865	7.60369e-08	2.20386e-07			TLR8	0.122688	0.58718	2.2588	1.10898e-53	3.67152e-51
LINC02495	0.682569	0.281748	-1.27657	3.44576e-11	1.43284e-10			COLEC12	1.81738	5.39695	1.57028	2.21303e-33	8.53959e-32
SHC3	21.809	6.78918	-1.68362	6.03963e-25	8.70354e-24			RUBCNL	0.735147	1.94665	1.40489	7.4621e-33	2.76728e-31
IL16	0.373675	1.05281	1.49439	1.17899e-64	2.14842e-62			SIT1	0.0519012	0.254363	2.29305	1.39354e-34	5.97444e-33
STAB1	4.31977	11.5699	1.42134	2.15142e-40	9.78136e-39			HLA-DQA1	1.13932	8.10752	2.83108	1.70712e-49	2.67106e-47
TGFB1	9.16919	19.8699	1.11571	2.64257e-56	2.47766e-54			RSAD2	1.68777	5.14321	1.60755	1.02265e-13	5.52017e-13
AL353746.1	0.331352	0.0798221	-2.05351	7.56768e-13	3.6917e-12			BST1	0.466471	0.935087	1.00331	2.73894e-32	9.64073e-31
C14orf180	0.189687	0.0588393	-1.68877	4.69635e-09	1.56149e-08			ITGB4	9.14891	22.8587	1.32107	1.7564e-31	5.8234e-30
RIT2	4.87402	1.85052	-1.39718	7.80314e-20	7.26492e-19			NLRP3	1.10093	2.64098	1.26235	2.2011e-40	1.45324e-38
SNAP25-AS1	0.682932	0.312994	-1.12561	8.66245e-25	1.22873e-23			C9orf135	0.053744	0.249651	2.21574	8.74998e-10	3.01076e-09
LINC02381	3.68288	7.64924	1.05448	5.15559e-33	1.44536e-31			PLA2G2A	0.0843536	2.25905	4.74312	1.51305e-13	7.9825e-13
CDH12	0.327636	0.102983	-1.66969	2.79007e-16	1.90352e-15			GATA3	0.0882789	0.194269	1.13791	2.38484e-19	2.41808e-18
BCL11A	1.40069	0.538639	-1.37875	5.27085e-07	1.38811e-06			NUP62CL	0.0608717	0.288083	2.24264	6.49226e-13	3.19082e-12
GRIP1	0.778512	0.346394	-1.16831	4.16883e-30	9.07504e-29			MTUS2	0.563387	0.280277	-1.00727	4.79424e-08	1.34297e-07
CNTF	0.619735	1.36595	1.14018	1.11812e-18	9.4062e-18			CD53	9.62056	27.6533	1.52326	2.91848e-56	1.66674e-53
DPYD	1.09398	2.85204	1.38241	3.79499e-24	5.09516e-23			PLBD1	0.485502	1.84774	1.92821	1.44099e-62	1.88976e-58
AC069549.1	0.0859271	0.195737	1.18773	5.83507e-16	3.86655e-15			MIR9-1	0.705605	0.292853	-1.26869	4.6478e-11	1.85731e-10
PTPN6	2.0416	6.01228	1.55822	5.76735e-75	5.42996e-72			AC015468.4	0.165883	0.0545387	-1.60481	0.000224483	0.000393833
CXCR4	8.06848	17.2538	1.09655	3.70242e-29	7.57102e-28			DGCR10	2.07375	0.95531	-1.1182	1.58122e-27	3.65605e-26
TLR8	0.11723	0.592659	2.33785	6.59595e-59	6.80558e-57			CXCL8	0.945661	2.94662	1.63967	1.66589e-07	4.36717e-07
COLEC12	2.34761	4.86472	1.05116	5.22698e-14	2.8709e-13			ACPP	0.0815986	0.263877	1.69325	3.89173e-40	2.53284e-38
RUBCNL	0.845088	1.83629	1.11962	1.15105e-30	2.63517e-29			MIR155HG	0.150134	0.384343	1.35614	9.32426e-13	4.49849e-12
ABCG4	0.883513	0.335361	-1.39754	1.47082e-16	1.02925e-15			RNASE6	5.82277	16.4015	1.49405	2.16453e-53	6.86757e-51
SIT1	0.060371	0.245861	2.02592	9.48519e-23	1.13641e-21			IL12RB1	0.360269	0.879649	1.28785	5.44855e-48	7.15326e-46
HLA-DQA1	1.18129	8.0654	2.77139	3.61997e-41	1.69703e-39			PHYHIP	34.6379	16.2251	-1.09413	7.16432e-09	2.20717e-08
CHN1	48.3426	18.161	-1.41245	3.34638e-12	1.53908e-11			VSNL1	40.5459	16.5077	-1.29642	9.43971e-07	2.25236e-06
RSAD2	1.57684	5.25456	1.73654	3.15873e-05	6.69871e-05			CFI	2.00424	8.19364	2.03145	5.71049e-38	3.11338e-36
AC103808.3	0.228764	0.0986798	-1.21303	0.0115333	0.0169126			TTR	0.0175059	200.236	13.4816	3.7955e-07	9.53423e-07
CYP4F12	0.277049	0.76801	1.47098	1.43152e-12	6.8329e-12			TNFRSF10C	0.29356	0.69791	1.24939	1.19525e-32	4.37568e-31
ITGB4	9.02476	22.9833	1.34863	1.07096e-33	3.16746e-32			CPNE9	1.60725	0.642729	-1.32231	1.21189e-10	4.62949e-10
NLRP3	1.01745	2.72478	1.42118	1.08004e-53	8.81034e-52			HYDIN	0.112129	0.231926	1.0485	0.000830246	0.00135144
C9orf135	0.0592305	0.244144	2.04332	3.30118e-06	7.9052e-06			CCDC8	0.979823	2.27131	1.21293	7.98123e-05	0.000148799
PLA2G2A	0.217378	2.12553	3.28954	9.77714e-08	2.79722e-07			MZB1	0.0866016	0.227282	1.39202	7.59451e-06	1.61687e-05
NUP62CL	0.0914051	0.257434	1.49386	2.49584e-05	5.3644e-05			LGALS9	4.05229	10.2441	1.33798	2.54995e-45	2.54371e-43
MTUS2	0.650267	0.193068	-1.75192	1.37031e-17	1.05175e-16			CD44-AS1	0.0580254	0.153999	1.40816	8.12691e-13	3.95339e-12
AC134312.4	0.568672	0.188497	-1.59306	5.54715e-13	2.73676e-12			HPGDS	1.58765	3.87649	1.28785	1.7017e-41	1.23802e-39
CD53	8.48719	28.791	1.76226	8.38155e-76	9.46947e-73			B2M	196.728	406.253	1.04617	1.95297e-45	1.95674e-43
PLBD1	0.604856	1.72793	1.51438	8.38382e-50	5.75808e-48			KCNQ1	1.60005	3.37786	1.07799	1.03678e-43	9.00543e-42
AC092809.2	0.32491	0.736894	1.18142	9.17019e-15	5.42575e-14			GPR160	0.316171	0.717377	1.18202	7.16237e-43	5.84347e-41
AC015468.4	0.187844	0.0324942	-2.53128	3.0117e-10	1.13364e-09			C11orf87	2.60888	1.26341	-1.04611	3.31993e-05	6.49932e-05
DGCR10	2.04562	0.983544	-1.05648	1.51185e-23	1.93443e-22			CD300LB	0.0534393	0.188424	1.81801	2.49911e-36	1.22773e-34
ZNF385B	1.03395	0.450586	-1.1983	7.66571e-09	2.48835e-08			GADD45B	20.1719	40.8486	1.01794	2.59498e-15	1.66657e-14
SP9	0.334114	0.153486	-1.12223	7.53225e-08	2.18399e-07			KYNU	0.0487944	0.153689	1.65522	8.19902e-55	3.53393e-52
CXCL8	1.01722	2.87479	1.49883	2.13335e-05	4.62622e-05			RAB38	0.146016	0.439641	1.5902	1.35812e-38	7.85444e-37
PLA2G7	1.77283	3.66915	1.04939	1.16747e-14	6.82539e-14			RGS18	0.620223	1.50139	1.27544	2.04318e-38	1.15817e-36
ACPP	0.0974802	0.247936	1.34679	3.29815e-36	1.17178e-34			AC092957.1	0.161774	0.378145	1.22496	0.00542872	0.00787389
CARD11	1.0405	2.61408	1.32903	1.56435e-56	1.47283e-54			KIAA0040	1.65369	5.10005	1.62482	2.22112e-37	1.16911e-35
MIR155HG	0.152623	0.381845	1.32302	3.67732e-15	2.26472e-14			HAPLN1	6.43082	3.21162	-1.0017	4.40098e-12	1.97517e-11
RNASE6	5.05047	17.1767	1.76597	3.31918e-76	4.50576e-73			SLFN12	0.343029	0.77174	1.16978	3.51876e-32	1.22162e-30
NEURL1	5.48921	1.73911	-1.65825	9.61567e-22	1.05218e-20			NTS	0.151694	2.99333	4.30251	0.000148949	0.000268259
IL12RB1	0.321358	0.918707	1.51542	1.21814e-69	3.93216e-67			EGF	0.30925	0.643986	1.05825	3.3974e-24	5.65672e-23
PHYHIP	39.1538	11.692	-1.74363	1.55734e-16	1.0851e-15			AIF1	15.0454	39.8621	1.40569	5.72737e-48	7.47635e-46
VSNL1	46.9925	10.0366	-2.22716	4.02281e-14	2.23945e-13			COL8A1	0.170219	1.49969	3.1392	7.63439e-26	1.48047e-24
CFI	2.21185	7.98524	1.85208	9.61144e-29	1.89346e-27			CELF4	8.2132	3.8108	-1.10785	9.79814e-18	8.32696e-17
EPB41L4B	2.02807	0.931288	-1.12281	2.49265e-14	1.41198e-13			CLIC6	0.0815764	1.10278	3.75685	6.25657e-15	3.86807e-14
CPNE9	1.77531	0.474031	-1.90502	1.64372e-18	1.36599e-17			STAR	0.78001	0.329785	-1.24197	1.91318e-26	3.95517e-25
PPFIA2	3.56837	1.55958	-1.1941	7.15204e-31	1.66263e-29			PINLYP	0.540453	1.22636	1.18214	9.54972e-07	2.2748e-06
MAP4K1	0.654949	1.36865	1.0633	1.75375e-54	1.47315e-52			CD69	0.273582	1.1296	2.04576	1.66275e-41	1.22135e-39
MZB1	0.0786024	0.235312	1.58193	7.66927e-12	3.40595e-11			F2RL1	1.2461	2.6854	1.10772	9.99362e-22	1.2986e-20
LGALS9	3.44837	10.8503	1.65374	9.74315e-72	4.49298e-69			ADGRE1	0.073079	0.623193	3.09215	1.3028e-45	1.35278e-43
CD44-AS1	0.051954	0.160093	1.6236	1.09929e-18	9.2512e-18			MAMDC2	0.368008	0.753363	1.03361	1.24396e-18	1.18652e-17
HPGDS	1.34176	4.12331	1.61967	1.23187e-61	1.63737e-59			FLJ33534	0.350954	0.172664	-1.02331	0.001253	0.00199009
B2M	198.197	404.778	1.0302	1.43844e-42	7.25514e-41			VNN2	0.182316	0.669693	1.87706	3.28824e-47	3.9535e-45
KCNQ1	1.40705	3.57159	1.34389	3.97362e-65	7.5452e-63			LHFPL2	3.66517	8.35118	1.1881	1.67873e-50	3.14336e-48
GPR160	0.287362	0.746296	1.37688	4.32158e-61	5.48598e-59			HMCN2	0.105107	0.380405	1.85567	0.00442904	0.00651704
C11orf87	3.1132	0.757179	-2.03969	6.35645e-14	3.46181e-13			AC113346.1	0.54446	0.202352	-1.42796	5.49559e-12	2.43911e-11
CD300LB	0.0544342	0.187425	1.78373	6.45873e-35	2.09085e-33			AMER3	2.99812	1.11916	-1.42164	3.00984e-27	6.74749e-26
EPHA8	0.340215	0.0613294	-2.4718	1.09948e-11	4.80499e-11			MAP3K19	0.10837	0.576715	2.41189	2.88055e-12	1.31791e-11
GADD45B	20.219	40.8013	1.0129	1.9626e-15	1.24012e-14			APOA2	0.178815	0.360384	1.01107	0.000998012	0.00160508
KYNU	0.04679	0.155701	1.7345	4.54541e-60	5.21361e-58			MX2	0.204883	0.856506	2.06366	2.15973e-48	2.91934e-46
RAB38	0.164194	0.421394	1.35977	1.10533e-39	4.85913e-38			LILRA4	1.02731	2.42934	1.24169	1.39918e-07	3.70199e-07
RGS18	0.54969	1.57219	1.51608	1.73745e-53	1.40715e-51			LIPM	0.0971431	0.35762	1.88024	3.22972e-30	9.43474e-29
KIAA0040	1.93553	4.81715	1.31545	3.90641e-23	4.82082e-22			AC061992.1	0.0822745	0.337003	2.03424	3.07191e-21	3.77283e-20
HAPLN1	6.51016	3.13198	-1.05562	3.23133e-14	1.81359e-13			ANKRD34C-AS1	0.191121	0.0821096	-1.21886	6.03821e-06	1.30387e-05
SLFN12	0.365966	0.748716	1.03271	6.96658e-28	1.26643e-26			IL4I1	0.311112	1.16888	1.90962	1.94924e-36	9.63819e-35
SLC38A8	0.231237	0.107033	-1.11131	2.63313e-12	1.22399e-11			DKK2	0.170375	0.466459	1.45304	0.000865814	0.00140543
AC007953.2	0.325808	0.14551	-1.16291	0.000372624	0.000682817			SLC4A10	4.97184	2.14166	-1.21505	4.69967e-13	2.34716e-12
NTS	0.16952	2.97544	4.13357	0.0133273	0.0193301			MIR1271	0.187921	0.0906793	-1.05128	1.35075e-08	4.03485e-08
EGF	0.309568	0.643668	1.05606	3.21811e-25	4.73722e-24			ST8SIA4	0.889076	2.02979	1.19095	2.46554e-42	1.90925e-40
AC006058.1	3.759	1.86262	-1.01301	1.5394e-09	5.37624e-09			NELL1	2.08802	0.990799	-1.07547	3.45625e-12	1.56284e-11
AIF1	12.8446	42.0713	1.71168	1.7616e-74	1.35477e-71			GPR6	0.367831	0.15853	-1.21429	4.77119e-15	2.98693e-14
COL8A1	0.306759	1.36263	2.15122	2.1184e-10	8.08569e-10			GNGT2	0.490753	1.24592	1.34414	3.13753e-52	7.96376e-50
CELF4	9.17394	2.84643	-1.68839	2.84406e-29	5.85286e-28			GPSM3	5.94848	14.3215	1.26759	1.86409e-53	5.99764e-51
STAR	0.816171	0.293487	-1.47557	5.82408e-31	1.37084e-29			HCST	2.54992	7.39546	1.53619	2.15612e-46	2.42633e-44
CCKBR	2.47556	0.625385	-1.98494	3.30591e-17	2.44839e-16			CXCL9	0.197933	1.29503	2.7099	2.71512e-25	5.01814e-24
KLK5	0.283912	0.0747163	-1.92595	5.73183e-14	3.13599e-13			S100A9	6.221	19.5758	1.65385	5.98115e-23	8.82644e-22
OR2L13	1.28268	0.623708	-1.04022	1.04942e-09	3.72723e-09			IL7R	0.118295	0.490605	2.05218	4.64769e-31	1.48492e-29
CD69	0.261454	1.14177	2.12664	8.85208e-43	4.5563e-41			GZMA	0.217482	1.11895	2.36318	4.06935e-34	1.66895e-32
ADGRE1	0.0722787	0.623996	3.10989	1.31979e-42	6.68657e-41			OAS2	1.50501	4.90956	1.70582	2.21607e-43	1.88895e-41
MAMDC2	0.373772	0.747576	1.00006	5.32973e-20	5.04104e-19			CXCL11	0.232866	0.943092	2.0179	3.68328e-24	6.10158e-23
FLJ33534	0.417193	0.106175	-1.97428	3.15052e-10	1.18294e-09			CPAMD8	1.16262	0.572932	-1.02094	3.19832e-05	6.27469e-05
VNN2	0.196692	0.655264	1.73614	1.42332e-43	7.5852e-42			AC018816.1	0.0736582	0.156802	1.09002	2.7388e-12	1.25457e-11
LHFPL2	3.56153	8.45522	1.24734	3.16542e-56	2.93139e-54			TEAD4	1.09345	3.09925	1.50304	4.81677e-24	7.89909e-23
HMCN2	0.103516	0.382002	1.88373	0.00333961	0.00531459			ADGRE2	0.179134	0.615872	1.78159	5.40901e-33	2.03564e-31
APOBEC3H	0.152448	0.348094	1.19115	4.96704e-36	1.7347e-34			GATA4	0.0505489	0.340318	2.75113	0.000633008	0.00104558
AC113346.1	0.510596	0.236344	-1.1113	8.14739e-13	3.96081e-12			KCNS2	0.78316	0.369792	-1.08259	9.07076e-06	1.90949e-05
LNX1	3.9054	1.73508	-1.17047	2.59449e-13	1.32546e-12			CFAP61	0.196598	0.541207	1.46093	8.60788e-17	6.53501e-16
AMER3	3.10275	1.01414	-1.61329	3.73952e-32	9.84826e-31			CLCF1	0.449377	1.78695	1.9915	2.58129e-20	2.88348e-19
AL049775.1	0.377624	0.125405	-1.59036	4.78377e-11	1.95575e-10			IRF6	0.328505	0.721852	1.13579	2.60341e-12	1.19518e-11
MAP3K19	0.122925	0.562106	2.19306	7.91537e-12	3.51042e-11			AC005165.1	0.136529	0.334898	1.29451	1.591e-11	6.69825e-11
MX2	0.205435	0.855951	2.05885	7.91664e-44	4.26932e-42			RPRML	1.15577	0.566504	-1.02869	2.89746e-10	1.05529e-09
AC007728.2	0.169093	0.343729	1.02345	1.22551e-23	1.57877e-22			FAM155A	6.9877	3.44242	-1.0214	8.41674e-27	1.80707e-25
LILRA4	1.00286	2.45389	1.29095	2.01062e-09	6.94784e-09			AC060766.4	0.305736	0.641074	1.0682	1.11449e-23	1.77171e-22
BHLHE41	15.4684	31.1405	1.00947	7.85636e-36	2.72273e-34			AL121932.1	0.218227	0.07463	-1.548	1.25452e-12	5.95559e-12
MEPE	0.909331	0.407644	-1.1575	9.63901e-10	3.43538e-09			AC007344.1	0.122908	0.404996	1.72033	2.0585e-11	8.56147e-11
EPHB6	9.87454	3.52818	-1.48479	1.31974e-08	4.16435e-08			F2RL2	0.209783	0.896606	2.09557	1.7008e-08	5.02952e-08
LIPM	0.0848957	0.369914	2.12343	4.8381e-35	1.58667e-33			LHX5	2.27937	0.600189	-1.92515	3.60517e-17	2.87658e-16
AC061992.1	0.0835945	0.335678	2.0056	4.097e-21	4.2642e-20			LCK	0.0912234	0.342061	1.90678	1.0938e-32	4.01715e-31
ANKRD34C-AS1	0.220859	0.0522593	-2.07936	4.48627e-13	2.23828e-12			PRR32	0.334924	0.720404	1.10497	6.01631e-13	2.97032e-12
IL4I1	0.271682	1.20846	2.15317	8.82772e-47	5.40572e-45			AC126564.1	0.544	0.222393	-1.2905	5.08042e-08	1.41758e-07
UNC5A	11.9418	5.35773	-1.15632	1.42139e-30	3.22143e-29			RUNX3	0.455603	1.01407	1.1543	1.50102e-29	4.13123e-28
SLC4A10	5.6555	1.45541	-1.95823	1.24586e-30	2.84645e-29			IGHA1	0.914378	15.26	4.06082	2.4436e-15	1.57333e-14
ST8SIA4	0.907098	2.0117	1.14908	1.7017e-41	8.12933e-40			CYP4F3	0.24634	0.744394	1.59542	7.4146e-06	1.58121e-05
NELL1	2.30366	0.774338	-1.57289	1.67308e-25	2.53385e-24			DCDC2	0.180398	0.490204	1.4422	1.27569e-05	2.63417e-05
SPTB	0.822951	0.300206	-1.45485	1.27996e-21	1.38184e-20			LINC00941	0.0706128	0.150765	1.0943	0.000456107	0.000768555
AC021074.2	0.355355	0.133422	-1.41326	1.64852e-12	7.83054e-12			FAM183A	0.120761	2.84837	4.55992	2.48103e-18	2.28719e-17
GPR6	0.412901	0.113289	-1.86579	3.74474e-22	4.23928e-21			GBP2	2.78353	12.3308	2.14727	1.05136e-44	1.00072e-42
GNGT2	0.44134	1.29552	1.55357	1.79869e-74	1.35477e-71			ROR2	0.188094	0.471778	1.32666	3.14793e-18	2.86043e-17
GPSM3	5.26825	15.0043	1.50998	1.17968e-79	6.80924e-76			ARHGAP15	0.266262	0.793298	1.57502	2.17906e-57	1.77781e-54
HCST	2.2299	7.71668	1.791	1.1272e-66	2.599e-64			G0S2	0.969158	2.99507	1.62779	1.31098e-07	3.47753e-07
CXCL9	0.248464	1.24431	2.32424	4.1599e-11	1.71496e-10			TEKT1	0.320297	1.75167	2.45125	2.11839e-10	7.84828e-10
S100A9	6.11804	19.6791	1.68553	3.31156e-23	4.11821e-22			NR4A3	0.82806	2.20279	1.41152	4.84876e-11	1.93105e-10
IL7R	0.134533	0.474306	1.81786	9.95603e-20	9.17107e-19			DNAAF3	0.19299	0.573649	1.57164	1.84042e-15	1.20432e-14
GZMA	0.249242	1.08707	2.12483	5.9093e-22	6.58415e-21			CST7	0.340495	0.979765	1.5248	8.80418e-32	2.9929e-30
OAS2	1.56742	4.84691	1.62867	3.46351e-28	6.51637e-27			AL357033.4	0.101278	0.243185	1.26374	2.56464e-35	1.15784e-33
CXCL11	0.242772	0.933149	1.9425	2.01881e-13	1.04411e-12			SYT4	10.9065	4.32256	-1.33522	5.0123e-18	4.43458e-17
CPAMD8	1.43884	0.295664	-2.28287	4.12679e-12	1.88192e-11			SPRY1	2.21709	4.92037	1.1501	8.6437e-14	4.70808e-13
SHISA8	0.796453	0.338467	-1.23457	1.18053e-23	1.52256e-22			MGP	7.11712	24.1755	1.76418	3.00552e-23	4.54389e-22
KSR2	1.37471	0.676319	-1.02335	1.43374e-18	1.19369e-17			AC129492.1	0.137734	0.0651386	-1.0803	1.18317e-11	5.05769e-11
TEAD4	1.14299	3.04952	1.41577	2.21316e-21	2.33904e-20			NKG7	0.615185	1.59338	1.373	2.06779e-24	3.50421e-23
AC019171.1	0.354052	0.168979	-1.06711	2.77312e-05	5.92599e-05			LINC01623	0.16323	0.0494751	-1.72213	9.90963e-10	3.38379e-09
ADGRE2	0.180619	0.614381	1.76619	4.09645e-31	9.79507e-30			AC008780.2	1.20746	0.548565	-1.13824	3.25187e-05	6.37428e-05
GATA4	0.0795923	0.311165	1.96698	0.0210932	0.029602			AKAIN1	0.362438	0.156266	-1.21373	5.8101e-13	2.8741e-12
KCNS2	0.919884	0.232549	-1.98392	7.5245e-15	4.48611e-14			VCAM1	4.26505	12.3482	1.53366	1.43102e-27	3.32557e-26
CFAP61	0.213778	0.523962	1.29335	3.95505e-10	1.46915e-09			LINC02207	0.0716741	0.174555	1.28416	9.3428e-17	7.07649e-16
CLCF1	0.448246	1.78809	1.99606	5.46094e-25	7.89478e-24			INSM2	1.04775	0.286432	-1.87103	3.55135e-28	8.71397e-27
AC005165.1	0.151494	0.319876	1.07825	2.29626e-09	7.88786e-09			HIPK4	1.12561	0.50061	-1.16895	7.05739e-06	1.50997e-05
RPRML	1.22663	0.495374	-1.30811	2.75788e-14	1.55667e-13			HAR1B	0.940832	0.430848	-1.12676	2.31972e-20	2.60914e-19
FAM155A	7.25055	3.17857	-1.18971	2.67685e-36	9.6469e-35			HLA-DQB1-AS1	0.242094	0.845015	1.80341	2.40866e-23	3.6805e-22
AC060766.4	0.307173	0.639631	1.05819	4.68603e-27	8.00345e-26			CASP8	0.513357	1.09184	1.08873	4.36062e-40	2.82193e-38
AL121932.1	0.231364	0.0614425	-1.91286	1.06011e-18	8.93815e-18			AC002480.1	0.13238	0.268292	1.01912	3.39203e-19	3.39559e-18
AC007344.1	0.121495	0.406414	1.74205	3.58936e-13	1.80998e-12			FCGR2C	0.0989221	0.665984	2.75112	2.15189e-38	1.21385e-36
LHX5	2.19615	0.68373	-1.68348	9.96554e-16	6.48377e-15			AL390755.1	0.085659	0.271165	1.66249	4.61535e-22	6.22024e-21
LCK	0.107003	0.326222	1.6082	2.48693e-20	2.42637e-19			GAPT	0.197669	0.978974	2.30819	8.28991e-54	2.86931e-51
TUBA8	0.191764	0.082816	-1.21135	1.7231e-14	9.91728e-14			S100A11	23.3363	85.973	1.88131	4.43689e-58	4.82649e-55
AC126564.1	0.511613	0.254903	-1.00511	1.59364e-05	3.51487e-05			ALDH1A3	0.255153	1.13301	2.15073	0.0103224	0.0143547
RUNX3	0.44579	1.02392	1.19966	4.4601e-36	1.56249e-34			AC010729.1	0.0792471	0.254817	1.68503	0.0191763	0.0256388
IGHA1	0.846271	15.3283	4.17894	1.5376e-12	7.32216e-12			CD274	0.390313	1.09616	1.48976	1.43233e-33	5.57413e-32
CYP4F3	0.279891	0.710716	1.34441	0.000297058	0.000551729			TNFAIP3	1.36785	3.07305	1.16776	7.44456e-38	4.03951e-36
ERICH5	0.179779	0.0808482	-1.15294	3.4225e-06	8.18012e-06			FNDC7	0.0931909	0.285287	1.61415	6.62693e-09	2.04885e-08
FAM183A	0.213067	2.75572	3.69305	5.42649e-14	2.9747e-13			AL355974.3	2.07189	4.18287	1.01355	2.3401e-07	6.03559e-07
GBP2	2.54931	12.5659	2.30133	2.53441e-54	2.11319e-52			RPS6KA1	2.50788	6.08999	1.27997	1.5038e-49	2.36916e-47
ARHGAP15	0.245572	0.814066	1.729	2.77805e-69	8.71845e-67			AL133264.2	0.401936	1.02668	1.35295	3.63244e-33	1.3784e-31
TEKT1	0.391031	1.68067	2.10368	2.22606e-06	5.43433e-06			BEND4	0.359683	0.147844	-1.28265	2.47172e-24	4.16093e-23
NR4A3	0.944706	2.0857	1.14259	2.10107e-05	4.55929e-05			RCSD1	2.30117	4.87692	1.0836	8.28583e-52	1.95136e-49
DNAAF3	0.199364	0.567251	1.50858	9.66876e-22	1.05748e-20			CNNM1	2.01695	0.902514	-1.16015	2.64284e-15	1.69682e-14
CST7	0.358816	0.961375	1.42186	1.67811e-25	2.53975e-24			AL162424.1	0.141918	0.353044	1.31479	1.72008e-18	1.61635e-17
WARS2-IT1	0.396928	0.875264	1.14084	8.98376e-26	1.39065e-24			AC093627.7	0.54919	1.30626	1.25007	1.52818e-30	4.58734e-29
AL357033.4	0.110397	0.234031	1.084	1.2137e-25	1.85427e-24			MRC2	5.91538	16.1826	1.4519	1.89092e-37	1.00223e-35
SYT4	12.2666	2.95728	-2.05239	8.68661e-32	2.18821e-30			CXCR3	0.0294262	0.187221	2.66957	8.09937e-39	4.81828e-37
MGP	10.3518	20.9286	1.0156	2.56897e-11	1.08158e-10			SCGN	1.40938	0.584032	-1.27094	6.43237e-16	4.44065e-15
AC129492.1	0.135953	0.066926	-1.02247	1.24513e-09	4.38514e-09			AC017074.1	0.0959398	0.414706	2.11189	0.00379606	0.00563904
NKG7	0.629588	1.57892	1.32646	2.11885e-19	1.89165e-18			SHISAL1	6.82932	3.25123	-1.07076	3.92419e-18	3.52098e-17
LINC01623	0.176874	0.0357796	-2.30551	1.45041e-15	9.28693e-15			HOXA7	0.171899	0.559664	1.703	3.71753e-08	1.05473e-07
AC008780.2	1.42242	0.332795	-2.09564	8.19637e-12	3.63005e-11			OASL	0.444678	1.60415	1.85097	4.37525e-29	1.14883e-27
AKAIN1	0.401355	0.117202	-1.77588	8.43407e-25	1.19859e-23			HAAO	0.653141	1.3824	1.08171	2.3166e-41	1.64861e-39
2020-09-05	31.0757	13.1331	-1.24258	5.44621e-33	1.52494e-31			EMP3	3.08375	17.0249	2.46489	3.02543e-30	8.84928e-29
VCAM1	4.40911	12.2035	1.46874	2.95647e-31	7.16786e-30			SCN3B	14.39	6.63431	-1.11704	6.84261e-21	8.1117e-20
LINC02207	0.0629479	0.183314	1.54209	9.97922e-23	1.19118e-21			IGLL5	0.0306706	0.378156	3.62405	1.53945e-10	5.80028e-10
INSM2	1.03965	0.294565	-1.81944	5.79146e-34	1.74485e-32			CD300LG	0.511326	0.212898	-1.26408	6.35793e-08	1.75348e-07
HIPK4	1.29914	0.326423	-1.99275	3.79986e-12	1.73809e-11			AC015818.6	0.147859	0.0650683	-1.1842	5.94715e-18	5.21123e-17
HAR1B	0.954094	0.417536	-1.19223	2.10134e-23	2.65559e-22			AC104407.1	0.217892	0.504766	1.212	0.0125293	0.0172245
SLITRK4	1.40334	0.547227	-1.35866	1.86208e-14	1.06764e-13			HLA-DQB2	0.543723	3.01949	2.47336	2.05585e-25	3.85266e-24
HLA-DQB1-AS1	0.232587	0.854558	1.87741	2.9216e-24	3.96972e-23			RUNX1	0.568756	1.56591	1.46112	1.95431e-47	2.4132e-45
AC002480.1	0.130088	0.270592	1.05663	5.22457e-24	6.95256e-23			PIK3AP1	1.73683	4.47025	1.3639	3.60049e-47	4.30626e-45
FCGR2C	0.112693	0.652161	2.53284	1.3906e-28	2.69948e-27			AKR1B10	0.0673854	0.153556	1.18826	1.50389e-09	5.02043e-09
DPRXP4	0.069671	0.151326	1.11903	2.20789e-20	2.16253e-19			NPNT	2.02115	5.59105	1.46795	5.15913e-14	2.89357e-13
AL390755.1	0.0943517	0.262439	1.47586	5.89743e-15	3.54977e-14			AP002954.1	0.13965	0.426686	1.61136	9.80762e-24	1.56785e-22
GAPT	0.193458	0.983201	2.34546	3.65685e-56	3.34535e-54			SLC2A9	0.222839	0.468411	1.07177	8.06474e-39	4.81021e-37
JAKMIP1	6.23457	3.1021	-1.00704	9.50429e-14	5.08185e-13			P2RY8	0.189262	0.579527	1.61449	1.86535e-31	6.16674e-30
S100A11	22.6547	86.6571	1.93551	9.94997e-66	2.00741e-63			ELAVL2	5.16187	2.44342	-1.079	3.72928e-24	6.16883e-23
CD274	0.407899	1.07851	1.40276	1.95093e-32	5.24176e-31			AC073636.1	0.286262	0.117871	-1.28013	3.45486e-14	1.97505e-13
TNFAIP3	1.43963	3.001	1.05975	1.16593e-29	2.46448e-28			LILRB2	0.302893	0.880354	1.53928	7.81224e-45	7.59416e-43
AC061961.1	1.34091	0.488753	-1.45603	2.73292e-12	1.26699e-11			AC093689.1	0.0447063	0.182029	2.02562	6.57228e-08	1.80975e-07
FNDC7	0.0999823	0.278469	1.47778	4.98203e-05	0.000102893			AC108463.2	0.116835	0.275411	1.23712	1.34302e-08	4.01254e-08
AL355974.3	1.97653	4.27859	1.11416	1.81362e-11	7.76735e-11			SLC14A2	0.615935	0.26165	-1.23514	3.50085e-06	7.77726e-06
RPS6KA1	2.44901	6.14909	1.32817	1.59195e-64	2.76706e-62			NAPSB	2.66103	13.7923	2.37381	2.22501e-35	1.0105e-33
TAB2-AS1	0.0749762	0.202356	1.43239	8.90102e-20	8.25307e-19			NEFM	17.8917	6.87371	-1.38013	8.95691e-08	2.42001e-07
AL133264.2	0.394866	1.03378	1.38849	2.72513e-37	1.04203e-35			TFEC	0.321088	0.923962	1.52487	1.74307e-46	1.99094e-44
BEND4	0.380104	0.127346	-1.57764	1.64469e-33	4.78294e-32			SERPINE1	4.51261	17.1275	1.92428	1.63426e-19	1.68395e-18
RCSD1	2.13818	5.04052	1.23719	1.28275e-65	2.54255e-63			GDNF-AS1	1.83239	0.837015	-1.1304	8.33203e-26	1.60893e-24
CNNM1	2.24817	0.67041	-1.74564	3.87274e-29	7.89788e-28			MTATP8P1	6.16662	2.38937	-1.36785	1.81261e-06	4.16784e-06
RASAL1	2.81414	1.12757	-1.31947	1.06273e-10	4.18572e-10			PARP9	2.87813	6.40956	1.15509	3.00986e-41	2.08989e-39
AL162424.1	0.132261	0.362737	1.45554	1.83929e-25	2.76701e-24			SPI1	7.15939	19.3118	1.43157	3.26952e-49	4.88163e-47
LINC00698	0.320143	0.790521	1.30409	1.20406e-05	2.70152e-05			GBP4	1.63061	3.4887	1.09727	6.07551e-25	1.09111e-23
AC093627.7	0.453919	1.4019	1.62687	4.03766e-48	2.59929e-46			MSR1	0.824352	3.846	2.22203	1.95316e-57	1.71393e-54
MRC2	6.71029	15.3847	1.19705	1.73306e-31	4.27514e-30			VGLL3	0.0601321	0.152432	1.34196	3.15279e-08	9.02988e-08
HCG22	0.678192	1.48818	1.13378	5.37448e-18	4.25969e-17			CD14	17.8064	62.3779	1.80864	7.28858e-48	9.3017e-46
CXCR3	0.0340388	0.182591	2.42337	7.84869e-29	1.55843e-27			VSTM1	0.0503971	0.236272	2.22903	4.06988e-10	1.45542e-09
SCGN	1.68671	0.305653	-2.46424	6.19594e-24	8.17777e-23			HRASLS2	0.0802468	0.162942	1.02184	3.16911e-08	9.0732e-08
AL139246.5	2.42003	1.10009	-1.13741	8.90897e-21	9.03127e-20			RAB32	3.07457	8.1014	1.39779	6.27563e-55	2.81099e-52
SHISAL1	7.56111	2.51667	-1.58708	1.3047e-30	2.97487e-29			RSPH4A	0.430884	1.64913	1.93633	3.70245e-16	2.6365e-15
SHISA6	6.49731	3.24382	-1.00215	6.90987e-11	2.77623e-10			BANCR	0.0695693	0.148597	1.09488	0.000335538	0.00057515
SLC9A2	0.400626	0.180434	-1.15079	1.56918e-22	1.84289e-21			SPAG17	0.0268041	0.231249	3.10892	4.0643e-06	8.96099e-06
AL161734.1	0.215505	0.104887	-1.03889	8.18682e-11	3.26779e-10			TRIM61	0.0666172	0.141778	1.08967	1.4361e-11	6.08427e-11
OASL	0.364357	1.68477	2.20913	1.44422e-21	1.54956e-20			ESM1	0.226757	1.44403	2.67088	7.71775e-14	4.23808e-13
HAAO	0.638806	1.39679	1.12867	5.10633e-51	3.66294e-49			CXCR2	0.15	0.327729	1.12754	2.85218e-30	8.36395e-29
EMP3	4.35945	15.7443	1.85261	3.45013e-16	2.3355e-15			IGKV4-1	0.127349	1.85037	3.86095	6.38313e-10	2.23165e-09
SCN3B	15.6016	5.41806	-1.52585	4.83425e-32	1.26137e-30			NCF1	0.268402	0.812205	1.59745	5.75766e-47	6.67654e-45
IGLL5	0.0227828	0.386074	4.08286	8.07958e-10	2.91035e-09			WWTR1-AS1	0.0652514	0.151896	1.219	1.1337e-15	7.61267e-15
CD300LG	0.540574	0.183539	-1.5584	8.06072e-08	2.33154e-07			HCP5	1.39344	3.66845	1.39652	7.60852e-44	6.65935e-42
CYP21A1P	0.623027	1.54325	1.30861	3.17493e-20	3.06846e-19			AC025211.1	2.07481	1.02032	-1.02395	1.20289e-20	1.39487e-19
HLA-DQB2	0.543991	3.01922	2.47252	8.73121e-20	8.1056e-19			TFPI2	0.0929429	0.439819	2.24249	5.26354e-16	3.67493e-15
PABPC1L2A	0.504602	0.196833	-1.35817	1.14956e-10	4.50805e-10			AC099521.2	0.338801	0.163046	-1.05516	3.26011e-20	3.617e-19
RUNX1	0.581269	1.55335	1.41811	2.63402e-51	1.91378e-49			GGT8P	0.109751	0.300974	1.4554	0.00550723	0.00798168
PIK3AP1	1.64706	4.56036	1.46925	1.58507e-62	2.28129e-60			FBP1	1.08788	3.84379	1.82101	6.90863e-52	1.66127e-49
AKR1B10	0.0661911	0.154755	1.22528	4.33447e-09	1.4467e-08			AC005682.1	0.087306	0.202537	1.21404	2.58679e-15	1.66224e-14
AP002954.1	0.132805	0.433557	1.70691	6.86431e-23	8.29444e-22			DAW1	0.104391	0.311512	1.5773	0.000205282	0.000362205
P2RY8	0.176608	0.592229	1.7456	3.89662e-37	1.46747e-35			C3	25.5089	104.659	2.03663	7.55e-58	7.49879e-55
LINC01511	0.356485	0.0889751	-2.00237	6.83731e-16	4.51215e-15			SSTR2	7.63127	3.64366	-1.06653	1.21431e-19	1.2713e-18
ELAVL2	5.55249	2.05132	-1.43658	8.99966e-36	3.09994e-34			PDPN	3.67651	18.5577	2.33561	3.04641e-44	2.7726e-42
NAP1L2	18.7304	8.95633	-1.0644	6.0357e-27	1.02543e-25			MT1A	0.670598	1.79125	1.41745	2.49349e-08	7.23408e-08
AC073636.1	0.276952	0.127215	-1.12237	7.94972e-10	2.86631e-09			CYTH4	1.57469	4.03221	1.3565	3.22256e-45	3.17311e-43
LILRB2	0.275188	0.908164	1.72254	1.95839e-58	1.96675e-56			IGHV3-23	0.11752	1.84912	3.97587	2.59786e-07	6.66728e-07
AC093689.1	0.0471091	0.179617	1.93085	2.24254e-08	6.89047e-08			GFAP	2095.26	4569.96	1.12505	5.00521e-30	1.43462e-28
SLC14A2	0.656484	0.220947	-1.57106	1.13963e-08	3.62537e-08			SV2B	5.56123	2.35214	-1.24143	1.1167e-05	2.32309e-05
NAPSB	2.53446	13.9194	2.45735	5.47352e-40	2.43944e-38			KRT18	0.210335	0.56241	1.41893	3.4984e-07	8.82871e-07
NEFM	20.4358	4.32006	-2.24197	1.3582e-15	8.71378e-15			CXCL10	0.809159	5.44656	2.75085	5.55932e-33	2.08534e-31
TFEC	0.28307	0.962123	1.76506	7.18131e-64	1.15906e-61			AC084859.1	0.0650326	0.237395	1.86805	4.8006e-12	2.14482e-11
UBE2QL1	9.69602	3.85441	-1.33088	1.43233e-33	4.17612e-32			P4HA3	0.0767089	0.168124	1.13206	3.51673e-19	3.51889e-18
SERPINE1	4.91411	16.7245	1.76696	1.13155e-14	6.6274e-14			SCARNA21	0.55651	0.273782	-1.02338	4.83133e-07	1.19522e-06
MTATP8P1	6.52699	2.02764	-1.68662	4.15721e-05	8.67933e-05			AL133163.3	0.630513	0.194929	-1.69358	3.61475e-25	6.61131e-24
PARP9	2.89592	6.3917	1.14218	9.94958e-37	3.65562e-35			TRPM3	0.57652	1.18533	1.03984	0.00143939	0.00226972
SPI1	6.04369	20.4317	1.75731	1.00639e-77	2.5267e-74			CCRL2	0.464772	1.01622	1.12862	2.99597e-42	2.31216e-40
AP001825.1	0.198486	0.0965089	-1.0403	4.02782e-15	2.4658e-14			HCG21	0.0981871	0.255935	1.38217	2.29238e-07	5.91719e-07
MSR1	0.793441	3.87703	2.28876	1.84954e-61	2.42978e-59			CCL21	0.0560672	0.161441	1.52578	8.01627e-11	3.12125e-10
CD14	15.4796	64.7135	2.0637	1.72084e-66	3.92768e-64			PLAU	1.23073	6.17688	2.32737	9.93602e-39	5.84996e-37
VSTM1	0.0589235	0.227713	1.9503	5.65364e-05	0.000115936			TMEM196	2.32808	0.986794	-1.23832	3.13831e-13	1.60779e-12
HRASLS2	0.0774345	0.165765	1.09809	7.71227e-11	3.08436e-10			AC069228.1	0.828959	0.409586	-1.01713	2.80189e-19	2.82464e-18
RALYL	3.01617	1.47758	-1.02948	1.01967e-10	4.02596e-10			CCL4L2	6.91528	17.9649	1.37732	9.19247e-06	1.93328e-05
RAB32	3.24238	7.93296	1.29081	5.77229e-54	4.76024e-52			ITGB2	5.95962	19.2218	1.68945	5.4643e-57	4.02666e-54
RSPH4A	0.515256	1.56444	1.60228	2.71819e-13	1.38552e-12			PRF1	0.313847	0.824959	1.39426	2.52016e-25	4.67672e-24
SLC7A4	1.03958	0.390249	-1.41354	1.99985e-17	1.51538e-16			CPLX1	27.5861	12.7948	-1.10838	2.19957e-27	5.01969e-26
SCN8A	4.13002	1.57426	-1.39148	4.82651e-36	1.68823e-34			ANKRD22	1.01732	4.11465	2.01599	2.75504e-36	1.34769e-34
ESM1	0.43455	1.23545	1.50744	0.00020907	0.000396716			MFAP5	0.127596	0.483068	1.92064	2.08501e-05	4.19574e-05
CXCR2	0.15087	0.326855	1.11535	1.95092e-32	5.24176e-31			ACTL6B	16.8925	6.8546	-1.30124	7.79499e-30	2.20382e-28
AC080078.2	0.187547	0.0730923	-1.35946	5.12264e-09	1.695e-08			AC002401.4	0.0482607	0.230689	2.25703	1.39976e-06	3.26286e-06
CRHR1	1.94704	0.928479	-1.06834	2.3926e-28	4.55845e-27			SERPINB2	0.0209104	0.308933	3.88501	0.00063845	0.00105396
IGKV4-1	0.102339	1.87548	4.19583	6.51049e-09	2.12896e-08			INSL3	0.0512745	0.164062	1.67792	2.78493e-06	6.2574e-06
NCF1	0.2392	0.841518	1.81478	7.11926e-65	1.31858e-62			KCNE3	0.531336	1.36073	1.35669	2.58199e-49	3.98534e-47
WWTR1-AS1	0.0694124	0.147719	1.08959	6.1586e-12	2.76056e-11			CD3E	0.140301	0.705706	2.33054	3.06305e-37	1.59754e-35
HCP5	1.45706	3.60459	1.30677	1.06019e-27	1.90581e-26			PAK3	5.16325	2.56641	-1.00852	1.68296e-27	3.88338e-26
MPP7	0.607635	0.267289	-1.18481	3.01414e-17	2.24038e-16			RAC2	1.1253	3.80223	1.75654	1.70331e-57	1.55642e-54
AC110491.1	1.20122	0.458423	-1.38975	7.95276e-09	2.57551e-08			FGFBP3	15.9352	7.36334	-1.11379	2.60668e-21	3.22923e-20
CFD	1.6477	3.72468	1.17666	9.81745e-30	2.08296e-28			CTSC	1.51107	4.77254	1.65918	2.02574e-57	1.71393e-54
AC015712.2	0.492394	0.209173	-1.23512	3.26264e-05	6.90611e-05			AL136964.1	0.826642	0.365357	-1.17796	2.33885e-25	4.36865e-24
NAIP	0.0769875	0.176637	1.19809	4.86699e-32	1.26845e-30			IRF8	2.27206	5.15664	1.18243	3.03943e-34	1.25556e-32
DIRAS2	16.3977	7.43771	-1.14056	3.69015e-10	1.37459e-09			SPTLC3	0.446496	0.962019	1.10742	8.09871e-28	1.91916e-26
AC099521.2	0.336813	0.165042	-1.02911	1.90307e-18	1.57003e-17			RHOV	0.537076	0.246598	-1.12297	3.41456e-13	1.74152e-12
FBP1	1.01001	3.92196	1.95721	2.68408e-64	4.49255e-62			LAT2	2.58943	6.7834	1.38937	3.40666e-50	6.03269e-48
LINC01094	7.06423	14.5772	1.04511	1.37309e-28	2.66779e-27			AC127526.2	0.148026	0.0729773	-1.02033	1.40367e-17	1.17672e-16
SCN2B	8.64723	3.56768	-1.27725	2.80228e-19	2.48023e-18			CD58	1.59903	3.89365	1.28392	8.05003e-40	5.12242e-38
NRXN3	2.74664	1.11628	-1.29896	2.63674e-20	2.56588e-19			LINC00601	0.119982	0.305719	1.34938	8.48155e-07	2.03479e-06
AMPH	10.0398	4.04476	-1.31161	3.31909e-29	6.80564e-28			AL022337.1	1.33983	0.52653	-1.34746	1.08426e-26	2.30193e-25
PRKCB	13.018	5.3723	-1.27689	1.63196e-13	8.52817e-13			SBSPON	0.427818	1.06143	1.31094	0.000689528	0.0011337
C3	23.6377	106.538	2.1722	7.57011e-69	2.25071e-66			NNMT	0.667739	5.93542	3.15199	4.0421e-23	6.05891e-22
SERTM1	1.53702	0.582167	-1.40063	2.17147e-09	7.47738e-09			AC060766.1	0.428673	0.879989	1.03761	1.62604e-24	2.78658e-23
SSTR2	7.68473	3.58999	-1.09801	1.89917e-21	2.02042e-20			CD109	0.645044	1.69688	1.39541	3.59147e-27	8.00424e-26
PDPN	6.35867	15.8654	1.31909	7.78834e-35	2.50335e-33			ISG20	0.289976	0.660779	1.18823	7.23137e-20	7.7592e-19
CYP26B1	2.78857	1.21869	-1.1942	3.05231e-16	2.07429e-15			CCR5	0.239747	1.30751	2.44724	4.71832e-60	7.18569e-57
CYTH4	1.37378	4.23388	1.62383	3.03427e-67	7.45242e-65			AC104695.3	0.160911	0.330883	1.04006	1.88774e-05	3.81739e-05
IGHV3-23	0.100454	1.86625	4.21554	8.0684e-08	2.33346e-07			SEZ6L2	43.8558	21.5316	-1.02631	3.52986e-20	3.89923e-19
SLC26A8	0.170575	0.0718504	-1.24734	1.22558e-10	4.79372e-10			AP000911.3	0.0491778	0.178157	1.85707	6.83037e-06	1.46469e-05
RASD2	5.63522	2.00553	-1.49049	6.58835e-24	8.66532e-23			TAGLN2P1	0.0618729	0.145076	1.22943	4.6363e-09	1.46065e-08
GFAP	1951.01	4714.74	1.27296	2.47269e-39	1.06021e-37			HTR1A	1.41913	0.508701	-1.48012	4.18424e-20	4.58661e-19
SV2B	6.3904	1.51982	-2.072	4.73923e-13	2.35824e-12			CELF3	16.4876	7.66214	-1.10556	8.51393e-29	2.20513e-27
CXCL10	0.829121	5.42652	2.71037	2.40892e-20	2.35229e-19			AC093503.3	0.927251	0.426047	-1.12195	2.48919e-23	3.79593e-22
AL365361.1	1.5122	0.687562	-1.13708	8.60646e-14	4.62587e-13			SHOX2	0.291749	0.962596	1.7222	5.5773e-10	1.96223e-09
SHANK1	5.76173	2.27638	-1.33976	1.61885e-25	2.45665e-24			SLC43A3	1.29635	2.93837	1.18056	8.0866e-21	9.50748e-20
P4HA3	0.0795333	0.165289	1.05536	1.72919e-16	1.19929e-15			DACH2	2.10291	1.00961	-1.0586	1.79864e-15	1.17832e-14
CYP4X1	1.67074	0.591907	-1.49705	7.36276e-19	6.2947e-18			SEZ6L	74.6962	33.3137	-1.16492	8.26283e-25	1.45758e-23
AL133163.3	0.654417	0.170934	-1.93677	3.33095e-34	1.02822e-32			AC008760.2	0.179102	1.13723	2.66667	3.72819e-43	3.11967e-41
CCRL2	0.420493	1.06067	1.33482	4.74816e-61	5.9276e-59			BX842568.4	0.190828	0.0891923	-1.09728	0.000174039	0.000310338
CCL21	0.0606595	0.156831	1.37041	1.53154e-08	4.79183e-08			SCRT2	2.31262	1.00265	-1.20571	2.98599e-22	4.12406e-21
PLAU	1.29516	6.1122	2.23856	9.66632e-36	3.31442e-34			DPP4	0.199525	0.442395	1.14876	1.64296e-07	4.30855e-07
TMEM196	2.41698	0.897563	-1.42912	1.54335e-19	1.3955e-18			GSDMC	0.327679	0.756501	1.20706	1.49979e-08	4.45819e-08
EPN3	0.320353	0.107262	-1.57852	9.33949e-17	6.65726e-16			SYNPR	5.4318	2.70757	-1.00443	7.88292e-07	1.89875e-06
CCL4L2	6.26179	18.6209	1.57227	2.98061e-09	1.01141e-08			ITGAX	2.7292	5.8022	1.08812	6.03228e-26	1.18285e-24
ITGB2	5.14626	20.0382	1.96116	3.14877e-76	4.50576e-73			EN1	0.40322	0.922698	1.19429	3.19948e-07	8.10838e-07
TPTEP1	5.1283	10.3185	1.00868	6.52134e-10	2.37021e-09			SLC11A1	1.09801	4.61716	2.07211	9.01886e-39	5.35135e-37
PRF1	0.341447	0.797254	1.22338	1.0449e-13	5.56982e-13			IL27	0.0644102	0.155282	1.26953	4.95481e-24	8.11381e-23
CPLX1	28.5536	11.8236	-1.272	3.05251e-32	8.06721e-31			LINC00578	0.205964	0.542488	1.3972	3.16969e-19	3.18237e-18
GALNTL5	0.196442	0.0804716	-1.28755	7.22494e-10	2.61501e-09			TRIM22	4.55289	10.0912	1.14824	1.30596e-32	4.74299e-31
POU6F2	0.186237	0.0803411	-1.21293	4.09463e-09	1.36968e-08			GLRA1	0.183361	0.0634056	-1.53201	2.53444e-15	1.62952e-14
ANKRD22	0.914087	4.21828	2.20625	1.75151e-40	8.01158e-39			CLEC4F	1.34662	0.630276	-1.09529	9.00595e-15	5.46369e-14
MFAP5	0.178871	0.431599	1.27077	0.000141139	0.000274372			AC015908.5	0.125002	0.409032	1.71026	2.96974e-18	2.71038e-17
ACTL6B	17.0944	6.65189	-1.36169	5.24202e-32	1.35992e-30			FAM19A3	0.16622	0.4793	1.52784	2.18815e-07	5.65954e-07
CHRDL2	0.2547	0.118748	-1.1009	1.36357e-17	1.04729e-16			STAT5A	2.04398	4.28228	1.067	1.00348e-42	8.10018e-41
CHD5	6.70712	2.23085	-1.5881	3.52762e-14	1.97351e-13			APOBEC3G	0.405958	1.24976	1.62225	6.85712e-57	4.74679e-54
AC002401.4	0.0547494	0.224176	2.03371	0.000412626	0.000751486			AC008556.1	0.157659	0.343592	1.12389	8.47673e-11	3.2906e-10
AL592114.3	0.238519	0.118586	-1.00817	3.85282e-09	1.29436e-08			CAMK2A	44.3087	17.8606	-1.31081	9.24263e-08	2.49337e-07
INSL3	0.0561218	0.159196	1.50417	0.00048242	0.000869973			AC012213.1	1.74401	0.60657	-1.52366	7.62033e-26	1.479e-24
BEX5	15.9144	6.3311	-1.32981	4.0188e-11	1.65982e-10			TLX1	2.20059	0.92937	-1.24357	8.23123e-14	4.49843e-13
KCNE3	0.518409	1.37371	1.40592	8.14972e-56	7.36604e-54			CXorf21	0.636067	1.89096	1.57187	7.44902e-43	6.05571e-41
CD3E	0.162971	0.682951	2.06717	3.09581e-25	4.56612e-24			ASCL2	0.151714	0.390846	1.36525	2.00767e-31	6.61806e-30
PAK3	5.52576	2.20253	-1.32701	3.49146e-39	1.48574e-37			TNFAIP6	0.78606	2.22873	1.50351	4.64301e-08	1.30253e-07
RAC2	1.05911	3.86866	1.86898	6.14896e-68	1.6156e-65			HOXB-AS1	0.138902	0.427258	1.62104	3.57406e-17	2.85275e-16
FGFBP3	16.2154	7.08205	-1.19513	6.94076e-24	9.10763e-23			LYZ	2.57688	10.0301	1.96063	1.62988e-34	6.93353e-33
HS3ST1	1.35634	3.27164	1.27029	1.09271e-29	2.31404e-28			TRGV7	0.131713	0.336302	1.35236	3.2128e-24	5.36893e-23
CTSC	1.44771	4.83615	1.74009	8.63969e-67	2.0126e-64			IL1RN	0.14166	0.789038	2.47766	3.9722e-33	1.50233e-31
AL136964.1	0.867976	0.323867	-1.42226	2.02808e-36	7.35579e-35			AC110774.1	0.23429	0.097069	-1.27121	6.13818e-19	6.01289e-18
IRF8	1.9271	5.5029	1.51376	9.49497e-56	8.54774e-54			CSF3R	1.49681	3.49115	1.22181	1.34807e-38	7.83594e-37
RHOV	0.590596	0.192875	-1.6145	1.04111e-20	1.05022e-19			IGLV2-14	0.23956	1.84879	2.94812	2.65805e-11	1.09328e-10
LAT2	2.28687	7.08711	1.63182	2.68105e-70	1.00968e-67			AC104024.2	0.799763	0.318292	-1.32922	9.56824e-07	2.27898e-06
CD58	1.79212	3.69984	1.04579	8.39946e-32	2.11824e-30			SPN	0.329732	0.938295	1.50875	1.7574e-46	1.99731e-44
LINC00601	0.126882	0.298793	1.23566	2.99946e-05	6.38251e-05			RBP1	2.73198	11.2411	2.04076	4.34692e-06	9.54726e-06
AL022337.1	1.29504	0.571491	-1.18019	1.22502e-20	1.22807e-19			MIR7-3HG	2.25094	1.05277	-1.09634	1.25618e-16	9.40551e-16
SBSPON	0.434829	1.0544	1.2779	1.1795e-07	3.33902e-07			AL008638.1	0.23161	0.0592149	-1.96767	1.08813e-08	3.28494e-08
LINC01574	0.352795	0.139327	-1.34035	8.73832e-08	2.51787e-07			COL4A2	7.21157	22.1977	1.62203	5.00853e-22	6.71843e-21
PTH2R	0.404174	0.124323	-1.70088	1.0996e-19	1.00715e-18			CCL8	0.213566	1.31563	2.623	1.88267e-18	1.75972e-17
NNMT	0.790896	5.8118	2.87742	1.77321e-18	1.46874e-17			CD40	1.11834	2.42424	1.11618	5.60306e-49	8.05008e-47
CD109	0.7638	1.57767	1.04653	1.45548e-15	9.31674e-15			KCNK4	0.183381	0.0884258	-1.0523	2.12931e-22	2.96597e-21
ISG20	0.307201	0.643488	1.06673	2.8036e-10	1.05884e-09			CBLN2	2.30107	0.940113	-1.2914	2.97887e-18	2.71654e-17
CCR5	0.241253	1.306	2.43654	2.93681e-61	3.79201e-59			DEPP1	9.10196	19.2445	1.0802	8.0317e-20	8.56564e-19
AC104695.3	0.161281	0.330512	1.03513	1.12142e-05	2.52386e-05			TNFRSF11B	0.322862	1.29449	2.00339	1.65735e-23	2.58082e-22
SEZ6L2	45.5525	19.8285	-1.19996	2.70123e-29	5.57415e-28			EFCAB12	0.108551	0.327307	1.59227	2.70284e-06	6.08371e-06
AP000911.3	0.0562504	0.171058	1.60455	0.00292931	0.00470506			H19	1.78285	4.44321	1.31742	0.000657491	0.0010836
LINGO2	0.554598	0.184057	-1.59129	7.6259e-12	3.38802e-11			HLA-G	0.663252	1.38445	1.06168	1.69279e-17	1.40516e-16
HTR1A	1.57849	0.348744	-2.1783	1.48007e-26	2.44472e-25			RGS10	13.3763	29.5155	1.14179	2.66543e-39	1.64565e-37
LRFN2	1.6951	0.720122	-1.23506	1.54532e-15	9.86665e-15			CFAP57	0.0858452	0.425071	2.3079	1.15111e-08	3.46409e-08
CELF3	16.9966	7.15122	-1.24898	3.37517e-34	1.03904e-32			CELSR3	6.62924	3.04686	-1.12152	1.07862e-29	2.99757e-28
DACH2	2.17693	0.935312	-1.21877	1.41996e-19	1.28651e-18			TRHDE-AS1	0.309467	0.13089	-1.24143	1.59576e-22	2.26139e-21
CLEC9A	0.665656	1.78726	1.4249	4.87899e-25	7.08975e-24			CLVS1	1.08924	0.488156	-1.15791	2.10236e-15	1.36633e-14
SEZ6L	76.6516	31.3509	-1.28981	4.26435e-29	8.67301e-28			P2RY6	0.20026	0.604017	1.59272	1.11542e-37	6.02378e-36
AC008760.2	0.182981	1.13334	2.63081	1.54744e-46	9.34921e-45			FNDC1	0.0922044	0.412479	2.16141	2.30415e-17	1.87785e-16
GLP2R	0.397809	0.171068	-1.21751	0.000502141	0.000903087			SP140	0.212492	0.477503	1.1681	3.9949e-44	3.5929e-42
ESYT3	0.290715	0.144626	-1.00728	4.61172e-21	4.76917e-20			DNAH9	0.421535	1.00133	1.2482	1.16659e-08	3.50745e-08
BX842568.4	0.219431	0.0604805	-1.85923	2.26742e-11	9.61249e-11			RNU6-353P	1.63129	0.729123	-1.16177	2.60408e-18	2.39677e-17
KCNJ12	0.749209	0.309661	-1.27468	3.83951e-15	2.35626e-14			SOHLH1	1.5777	0.618687	-1.35054	7.65256e-10	2.64996e-09
SCRT2	2.28366	1.03173	-1.14629	9.30106e-20	8.59935e-19			UNC79	5.67604	2.41049	-1.23556	3.56929e-27	7.96259e-26
GSDMC	0.309892	0.774355	1.32123	6.07242e-11	2.45286e-10			SPP1	118.877	462.278	1.95929	7.31219e-34	2.91518e-32
SYNPR	6.29562	1.84048	-1.77427	1.93779e-14	1.10964e-13			TMC8	1.12938	2.35413	1.05966	4.15335e-35	1.85673e-33
ITGAX	2.31583	6.21714	1.42472	1.86045e-45	1.07792e-43			AC090559.1	1.27452	3.23499	1.34381	4.56354e-40	2.9449e-38
CPSF1P1	0.479892	0.234145	-1.03531	1.60459e-08	5.01206e-08			ATP5PBP5	0.204546	0.571766	1.483	0.000129236	0.000234717
CA11	60.01	29.3773	-1.0305	4.76169e-09	1.58251e-08			WAS	4.15824	8.80493	1.08234	9.57278e-39	5.65066e-37
SLC11A1	0.945443	4.77031	2.33502	2.4264e-53	1.94422e-51			L1CAM	20.6399	6.34224	-1.70237	1.8828e-24	3.20497e-23
IL27	0.0509734	0.168769	1.72724	8.55135e-45	4.81861e-43			ZMAT4	1.35322	0.651665	-1.05419	5.08484e-12	2.26783e-11
LINC00578	0.173276	0.575299	1.73124	1.62445e-27	2.87665e-26			LINC01506	0.0933261	0.222109	1.25092	1.25855e-20	1.45719e-19
VIP	2.12022	0.729278	-1.53968	3.2188e-13	1.62893e-12			RPL34P33	0.371995	0.166627	-1.15866	1.40977e-18	1.33686e-17
TRIM22	4.66611	9.97755	1.09647	4.36392e-30	9.48145e-29			AQP9	0.217072	0.453466	1.06282	2.10445e-06	4.79712e-06
GLRA1	0.181546	0.0652278	-1.47678	4.773e-22	5.35239e-21			NEUROD6	2.25299	0.8057	-1.48353	1.43222e-06	3.33513e-06
AC015908.5	0.157523	0.376388	1.25666	1.1108e-11	4.853e-11			APBB1IP	4.22067	11.3226	1.42366	2.17846e-44	2.02296e-42
STAT5A	1.97598	4.35054	1.13862	2.78563e-49	1.85129e-47			AC011287.1	0.177475	0.0877524	-1.0161	5.14819e-06	1.12122e-05
APOBEC3G	0.418054	1.23762	1.5658	5.62445e-61	6.94481e-59			MCF2	1.75711	0.873141	-1.00891	1.65135e-19	1.70079e-18
NEUROG2	0.153951	0.0574882	-1.42114	1.43765e-09	5.03254e-09			DERL3	0.299473	0.62694	1.0659	1.77529e-22	2.50029e-21
AGBL2	0.128051	0.256249	1.00082	7.98704e-07	2.05623e-06			CD6	0.123533	0.262493	1.08739	7.49902e-18	6.48892e-17
AC005865.2	0.197818	0.0613593	-1.68882	3.25766e-13	1.64786e-12			HLA-DMB	2.79707	10.4677	1.90396	4.54541e-60	7.18569e-57
CALY	8.63831	2.9533	-1.54842	4.2766e-17	3.13441e-16			AZU1	0.450193	0.213157	-1.07863	4.1944e-17	3.30974e-16
CAMK2A	51.7856	10.3555	-2.32215	1.25568e-15	8.08587e-15			LINC01358	0.0873909	0.350329	2.00316	1.65679e-23	2.58082e-22
AC012213.1	1.77328	0.577185	-1.61932	1.81852e-29	3.80122e-28			ARHGAP19-SLIT1	0.185475	0.0917969	-1.01471	1.89029e-20	2.15801e-19
TLX1	2.3069	0.822658	-1.48759	9.11033e-14	4.88623e-13			CALHM6	0.756529	2.87036	1.92377	1.33021e-42	1.05879e-40
CXorf21	0.552131	1.97521	1.83893	1.6248e-60	1.9222e-58			FPR3	0.782742	2.98214	1.92974	7.80047e-32	2.65961e-30
ASCL2	0.141973	0.400623	1.49663	8.31381e-43	4.28901e-41			SOCS2	1.43812	3.26351	1.18224	6.48088e-17	4.97812e-16
LYZ	2.56088	10.0461	1.97192	1.84685e-25	2.77655e-24			TNFSF18	0.852947	2.24975	1.39924	2.17668e-06	4.94964e-06
NGEF	14.7099	5.88798	-1.32094	4.25687e-11	1.75238e-10			GBP1	2.46667	11.5821	2.23126	7.05035e-48	9.09933e-46
TRGV7	0.114975	0.353104	1.61877	1.74721e-32	4.72249e-31			CTSZ	18.8458	48.4562	1.36244	1.8525e-60	4.70205e-57
IL1RN	0.142857	0.787836	2.46332	1.46603e-31	3.65231e-30			SIGLEC11	0.331941	0.711059	1.09904	3.41725e-24	5.6815e-23
AC110774.1	0.260736	0.0705225	-1.88644	3.56521e-34	1.09456e-32			IGLC2	0.56548	6.38172	3.4964	9.0887e-14	4.93633e-13
PCDHGA6	1.15158	0.454141	-1.3424	8.15013e-08	2.3565e-07			WDR38	0.235544	2.09715	3.15436	6.65303e-22	8.85675e-21
CSF3R	1.27845	3.71034	1.53715	7.82458e-63	1.15558e-60			AL035446.1	0.800793	2.54856	1.67018	3.0057e-14	1.72866e-13
IGLV2-14	0.145343	1.94337	3.74103	9.02778e-09	2.90338e-08			PTGS1	1.76961	5.59937	1.66183	8.11389e-51	1.62591e-48
AC104024.2	0.930188	0.187373	-2.31161	1.6052e-12	7.63602e-12			C1QB	56.1158	192.752	1.78027	2.37543e-51	5.25782e-49
RTN4RL1	3.01001	0.985384	-1.61101	2.80445e-15	1.74523e-14			TEX26	0.483013	1.4903	1.62547	1.39144e-08	4.14908e-08
SPN	0.289613	0.978565	1.75654	9.9019e-65	1.81905e-62			SYCE1	0.472114	0.163378	-1.53092	5.02732e-11	1.99729e-10
MIR7-3HG	2.44966	0.853288	-1.52148	1.59135e-23	2.03154e-22			DNALI1	5.55308	11.4286	1.04129	2.28453e-23	3.50019e-22
ENC1	50.4056	17.4928	-1.52682	2.37461e-14	1.3485e-13			TSTD1	1.85604	4.47406	1.26936	9.47754e-08	2.55433e-07
COL4A2	9.72175	19.678	1.0173	1.98774e-11	8.46814e-11			MMP19	0.170323	0.979241	2.52339	5.47294e-24	8.9239e-23
CCL8	0.216933	1.31225	2.59672	4.45247e-19	3.87999e-18			C7	0.683331	2.44381	1.83847	2.37473e-19	2.40889e-18
TGFBR3L	0.837577	0.395172	-1.08374	1.03825e-12	5.00539e-12			CCL5	0.74013	3.2352	2.12801	1.86165e-42	1.46143e-40
KCNK4	0.186077	0.0857194	-1.1182	7.5024e-24	9.8161e-23			CKMT1A	1.38559	0.671225	-1.04563	1.85794e-25	3.49611e-24
CBLN2	2.55547	0.684748	-1.89994	2.8226e-23	3.52567e-22			IGKC	2.12081	7.82888	1.88419	9.64485e-16	6.52631e-15
TNFRSF11B	0.418007	1.19898	1.52021	1.07263e-09	3.80192e-09			SNX20	0.208482	0.814518	1.96602	5.98561e-53	1.64741e-50
AL627309.6	0.574735	1.2869	1.16293	9.35438e-22	1.02458e-20			AC007450.4	0.17356	0.0723757	-1.26186	6.04766e-12	2.67582e-11
EFCAB12	0.117384	0.318441	1.43979	3.43876e-06	8.21636e-06			C8orf34-AS1	0.246492	0.810303	1.71692	9.33944e-14	5.07011e-13
PABPC1L2B	0.569697	0.197646	-1.52728	1.33009e-12	6.36754e-12			LILRA2	0.586163	1.58709	1.43701	5.40607e-44	4.78668e-42
ANO3	1.15652	0.427377	-1.43621	1.15849e-13	6.14488e-13			OR2I1P	0.211934	0.76939	1.8601	6.21283e-18	5.43361e-17
ARHGAP45	3.42957	7.10776	1.05137	4.74816e-61	5.9276e-59			UCP2	6.85507	17.7054	1.36895	4.16402e-43	3.44648e-41
HTR2C	1.48473	0.253199	-2.55186	2.10946e-16	1.4541e-15			PIK3R6	0.373728	0.844466	1.17605	2.77802e-33	1.06478e-31
HLA-G	0.668067	1.37961	1.0462	5.1367e-14	2.82475e-13			LINC01982	0.078905	0.184531	1.22567	5.2755e-06	1.14753e-05
PLEKHA3P1	0.213898	0.494746	1.20977	5.70845e-35	1.8613e-33			PAX3	0.0659426	0.260606	1.98259	0.00394105	0.0058415
ARHGAP4	2.79983	6.66744	1.2518	2.19915e-54	1.84044e-52			SIRPB2	0.428418	1.22471	1.51535	2.51829e-46	2.80623e-44
RGS10	11.2492	31.6507	1.49242	2.72147e-67	6.75763e-65			TCAF2	0.216424	0.509116	1.23413	2.75916e-19	2.78279e-18
CFAP57	0.110075	0.400749	1.86421	0.000420568	0.000764779			KCNS1	2.46375	0.916503	-1.42665	0.000668347	0.0011003
RESP18	0.219762	0.101955	-1.10801	4.08596e-11	1.68602e-10			MNDA	2.69761	7.42941	1.46157	4.76934e-48	6.33435e-46
CELSR3	6.62134	3.05478	-1.11605	6.42675e-29	1.28626e-27			MAP3K7CL	0.409119	1.64201	2.00487	5.81582e-36	2.79698e-34
TRHDE-AS1	0.322832	0.117475	-1.45843	1.35566e-28	2.63847e-27			MAL2	4.09429	1.91308	-1.09772	1.33342e-06	3.11619e-06
CLVS1	1.18278	0.394266	-1.58494	4.66519e-29	9.45422e-28			PTPRC	1.15399	4.10389	1.83037	4.71036e-54	1.70799e-51
P2RY6	0.207561	0.596688	1.52344	3.37009e-36	1.19546e-34			BCAT1	1.72315	3.80874	1.14426	6.82012e-12	2.99555e-11
AC237221.1	0.144921	0.0580946	-1.31879	5.62893e-05	0.000115471			NWD2	0.428377	0.177262	-1.273	6.44145e-08	1.77565e-07
FNDC1	0.141193	0.363305	1.36351	2.32055e-08	7.11738e-08			AL160191.1	0.274328	0.132901	-1.04555	6.56946e-13	3.22737e-12
RBP4	4.09809	1.28072	-1.67799	3.54096e-12	1.62559e-11			DRC1	0.19451	1.2914	2.73102	0.000774175	0.00126522
SP140	0.198233	0.491816	1.31092	5.66589e-62	7.80649e-60			SLC2A10	1.33194	3.29361	1.30615	4.56622e-26	9.13404e-25
RNU6-353P	1.74492	0.615054	-1.50438	1.01678e-24	1.43865e-23			DES	0.52624	2.10347	1.99898	3.21875e-07	8.1545e-07
SOHLH1	1.72664	0.469185	-1.87973	2.71477e-14	1.53281e-13			AL354919.2	0.279829	2.00613	2.8418	2.64122e-27	5.96207e-26
SHISA9	3.74539	1.64037	-1.19109	2.22415e-20	2.17562e-19			AC010754.1	0.0839606	0.216408	1.36597	2.26845e-05	4.53889e-05
UNC79	5.80715	2.27889	-1.3495	3.51535e-31	8.4503e-30			HCK	3.18547	8.45385	1.4081	7.1521e-52	1.7019e-49
SPP1	117.001	464.162	1.98811	3.92512e-37	1.47574e-35			CLEC17A	0.153233	0.779283	2.34642	2.07442e-28	5.19606e-27
TMC8	0.947543	2.53665	1.42066	8.99828e-61	1.09905e-58			HOXA4	0.161495	0.692468	2.10026	2.35938e-15	1.52253e-14
GPRIN1	15.14	7.45229	-1.02261	4.81864e-35	1.58259e-33			FGFRL1	4.70917	9.4826	1.00981	7.7534e-13	3.77813e-12
AC090559.1	1.17473	3.33517	1.50544	8.10422e-50	5.58302e-48			CARD16	0.542747	1.89301	1.80233	8.68941e-51	1.71121e-48
WAS	3.60097	9.3643	1.37878	1.91558e-69	6.09641e-67			STMN2	65.8779	31.7902	-1.05121	4.1772e-10	1.49193e-09
L1CAM	21.67	5.30822	-2.0294	1.78549e-34	5.61124e-33			SLAMF6	0.0595526	0.251927	2.08077	1.51459e-35	6.98976e-34
ZMAT4	1.51737	0.486897	-1.63988	1.3522e-21	1.45913e-20			SKAP2	2.85111	6.43785	1.17505	3.61528e-32	1.25322e-30
AL049651.2	0.212712	0.0647059	-1.71693	1.31758e-13	6.94633e-13			FXYD5	4.00276	9.87706	1.30309	1.36751e-50	2.64741e-48
PRSS3P4	0.42201	0.16302	-1.37223	3.7645e-09	1.26619e-08			AC006033.2	0.072541	0.184709	1.34838	2.93622e-38	1.63598e-36
LINC01506	0.0774636	0.238032	1.61956	1.1558e-34	3.67319e-33			FES	1.50474	3.0454	1.01711	3.90985e-43	3.24787e-41
RAB3B	1.17998	0.545635	-1.11275	1.56388e-07	4.36104e-07			HTRA3	0.373648	1.05929	1.50334	5.6042e-10	1.97109e-09
RPL34P33	0.372838	0.16578	-1.16928	1.84573e-15	1.17185e-14			RNASE4	0.093212	0.239843	1.3635	1.9758e-37	1.04238e-35
NEUROD6	2.57989	0.477565	-2.43354	3.62006e-14	2.02172e-13			AC138207.5	1.82195	3.788	1.05595	5.79263e-33	2.16929e-31
APBB1IP	3.61363	11.9319	1.7233	4.92156e-65	9.26729e-63			LINC02550	0.0599756	0.190107	1.66437	3.37575e-10	1.22057e-09
AC011287.1	0.209253	0.0558539	-1.90552	2.00758e-15	1.26713e-14			CLEC2B	0.7287	1.76331	1.27489	1.24218e-38	7.23889e-37
REM1	1.47299	3.05153	1.05079	1.27884e-07	3.59814e-07			TCIRG1	2.52629	5.40628	1.09762	1.77044e-28	4.47389e-27
MCF2	1.90042	0.72928	-1.38178	7.90613e-32	2.00053e-30			MIR124-2	1.167	0.435166	-1.42317	7.6922e-21	9.07647e-20
HLA-DMB	2.51294	10.7529	2.09728	4.31946e-76	5.42236e-73			MYOF	1.56238	4.63269	1.5681	1.19913e-47	1.51342e-45
AGAP2	21.6885	9.94771	-1.1245	2.85259e-32	7.55653e-31			MMP7	0.169621	0.820822	2.27476	5.45301e-16	3.79898e-15
LINC01358	0.0828248	0.354912	2.09933	1.47326e-28	2.85503e-27			FCN1	0.0722207	0.193416	1.42122	4.95187e-13	2.4645e-12
CALHM6	0.724639	2.90237	2.0019	2.92951e-47	1.81855e-45			C1R	5.7211	27.4565	2.26278	2.4429e-47	2.96838e-45
FPR3	0.713237	3.05191	2.09726	8.19186e-38	3.24174e-36			HSPA7	0.420923	2.30005	2.45003	2.51639e-29	6.77083e-28
TNFSF18	0.712711	2.39052	1.74594	1.64823e-08	5.13916e-08			RFPL2	0.360176	0.149228	-1.27118	1.29522e-09	4.3608e-09
GBP1	2.53842	11.5101	2.1809	7.05081e-43	3.65413e-41			ATP2B3	3.15719	1.47599	-1.09696	4.39468e-13	2.20933e-12
CTSZ	18.3209	48.9832	1.4188	1.86164e-66	4.16491e-64			B3GNT7	0.570573	1.71005	1.58355	1.39787e-18	1.32612e-17
AL451060.1	0.35168	0.706799	1.00704	2.49968e-12	1.16465e-11			TRIP6	11.3933	23.5022	1.04461	1.50648e-25	2.85831e-24
SIGLEC11	0.277972	0.765233	1.46096	1.08701e-41	5.25957e-40			SMCR5	0.256489	0.0976019	-1.39392	2.82402e-30	8.29203e-29
IGLC2	0.457741	6.48987	3.82558	2.27734e-10	8.66746e-10			AC106865.1	0.103398	0.482422	2.22209	2.17391e-31	7.14543e-30
WDR38	0.283864	2.04864	2.8514	5.03514e-19	4.3625e-18			AC012213.4	3.49701	1.37504	-1.34665	2.00999e-25	3.77291e-24
AL035446.1	0.842793	2.5064	1.57237	3.98173e-21	4.14805e-20			RARRES3	16.0746	36.9241	1.19978	3.26373e-39	2.00961e-37
SCG5	50.0788	24.9231	-1.00672	2.04372e-24	2.82101e-23			TNFRSF1A	10.0898	23.203	1.20141	3.7872e-46	4.15936e-44
PTGS1	1.70529	5.66393	1.73179	1.60024e-62	2.28855e-60			C19orf84	0.115235	0.258364	1.16483	4.1062e-28	1.00216e-26
PTPN20	0.327343	0.141435	-1.21066	8.29529e-10	2.98329e-09			SHISAL2A	0.136452	0.324308	1.24897	2.33326e-20	2.62179e-19
C1QB	48.2895	200.608	2.0546	4.58748e-74	2.96168e-71			COL3A1	3.51902	18.6018	2.4022	1.26305e-18	1.20371e-17
TEX26	0.555444	1.4176	1.35174	0.000261156	0.000488987			PDCD1LG2	0.324403	1.39653	2.10599	7.65718e-54	2.69109e-51
SYCE1	0.497569	0.137827	-1.85204	3.41579e-18	2.75752e-17			LPCAT2	1.68566	4.36015	1.37107	3.68893e-44	3.33083e-42
SHANK2	2.62864	1.19051	-1.14274	9.78678e-34	2.90976e-32			AC133065.3	0.581573	1.54959	1.41386	2.00997e-28	5.04015e-27
RGS7BP	4.6186	1.63503	-1.49814	1.42212e-27	2.53026e-26			IQGAP2	1.16873	2.6644	1.18887	4.33847e-20	4.74428e-19
LINC01785	0.534029	0.201171	-1.40849	9.56339e-13	4.62333e-12			AL161645.1	0.182612	0.0832749	-1.13283	4.47904e-20	4.88631e-19
DNALI1	5.47246	11.5095	1.07257	8.39946e-32	2.11824e-30			CHI3L2	2.62311	22.5136	3.10145	3.94224e-47	4.69045e-45
MMP19	0.184905	0.964604	2.38315	2.86158e-18	2.32507e-17			CREG2	7.4008	3.50698	-1.07745	1.63232e-06	3.76996e-06
AKAP5	1.86948	0.617336	-1.59851	4.71584e-33	1.32701e-31			AC097468.2	0.593271	0.194133	-1.61164	2.19373e-28	5.47092e-27
C7	0.908988	2.21729	1.28647	4.99716e-07	1.32096e-06			PTPN7	0.173023	0.688021	1.99149	3.31373e-43	2.80366e-41
CCL5	0.843825	3.13111	1.89166	1.01792e-28	2.00008e-27			AC004066.2	0.199573	0.0602143	-1.72874	1.75685e-07	4.59139e-07
CKMT1A	1.48383	0.572609	-1.3737	1.23161e-31	3.07847e-30			ZMYND12	0.592574	1.24565	1.07184	1.90377e-14	1.12029e-13
IGKC	1.89376	8.05679	2.08895	3.90006e-17	2.8659e-16			INHBA-AS1	0.434504	0.173479	-1.32461	1.49806e-13	7.91543e-13
SNX20	0.188383	0.834693	2.14758	4.26816e-70	1.50693e-67			ST8SIA2	1.36465	0.647822	-1.07486	2.61655e-13	1.34653e-12
AC007450.4	0.186427	0.0594605	-1.64861	8.58861e-20	7.97978e-19			DOC2A	3.42536	1.67117	-1.0354	1.28722e-11	5.47994e-11
TMEM191A	0.299882	0.140244	-1.09645	0.000467087	0.000844344			LINC01166	0.205987	0.0981749	-1.06912	5.88213e-14	3.27735e-13
C8orf34-AS1	0.250723	0.806055	1.68478	7.25067e-08	2.10885e-07			GBGT1	0.92874	2.01588	1.11806	7.10917e-48	9.1237e-46
CDH18	2.78872	1.21653	-1.19683	1.7591e-21	1.87494e-20			SAA1	0.106407	4.36566	5.35853	3.50443e-10	1.2641e-09
LILRA2	0.504828	1.66873	1.72489	1.15082e-63	1.84426e-61			LILRB1	0.780846	2.42849	1.63695	8.25411e-51	1.63963e-48
OR2I1P	0.208662	0.772674	1.88869	1.49081e-20	1.48202e-19			AC011899.3	0.0603686	0.205481	1.76714	1.15972e-28	2.9767e-27
UCP2	6.03406	18.5295	1.61863	1.34706e-60	1.61905e-58			ELK3	3.66138	7.77164	1.08583	6.954e-51	1.40582e-48
PIK3R6	0.357862	0.860392	1.26559	2.34088e-44	1.29962e-42			AC073525.1	0.154625	0.0567237	-1.44675	1.95628e-15	1.27757e-14
AL118522.1	0.176503	0.07527	-1.22955	1.41086e-10	5.48328e-10			IGHG3	0.29646	3.30168	3.47729	3.88311e-10	1.39365e-09
SNAP91	21.1654	8.67839	-1.28621	1.50396e-41	7.21515e-40			RGS1	8.16615	21.2115	1.37712	1.47626e-21	1.8819e-20
SIRPB2	0.370277	1.28307	1.79293	1.07906e-61	1.44275e-59			MMEL1	0.190896	0.604569	1.66312	3.47516e-26	7.05033e-25
TCAF2	0.235548	0.489921	1.05653	2.40625e-14	1.36578e-13			TNFSF14	0.0319483	0.198673	2.63658	4.29246e-40	2.78571e-38
KCNS1	2.84149	0.537338	-2.40274	1.51649e-10	5.8778e-10			C15orf48	0.105837	0.336661	1.66945	1.97394e-12	9.17636e-12
MNDA	2.38925	7.73894	1.69558	3.96444e-66	8.61351e-64			AC060766.7	0.209915	0.446006	1.08726	4.67866e-31	1.49065e-29
KCNH4	0.583037	0.286269	-1.02622	4.53737e-21	4.69659e-20			BST2	20.7168	59.2364	1.51569	4.72558e-47	5.53596e-45
MAP3K7CL	0.492939	1.55787	1.6601	2.0692e-25	3.0923e-24			EMILIN2	0.774219	1.87722	1.27779	3.47134e-30	1.0089e-28
PILRA	2.44649	5.34711	1.12805	3.10152e-58	3.07377e-56			SIGLEC1	0.821103	2.25124	1.45508	7.29063e-10	2.53149e-09
MAL2	4.79203	1.21269	-1.98242	3.44267e-15	2.12776e-14			RASAL3	1.00016	2.34858	1.23156	3.81375e-42	2.91376e-40
PTPRC	1.08404	4.1741	1.94505	6.72032e-62	9.20317e-60			BTK	1.12575	2.81185	1.32064	2.0196e-46	2.28395e-44
AF127936.1	1.0836	2.32384	1.10068	1.03806e-25	1.59347e-24			CLIC1	12.1614	38.023	1.64456	2.14715e-58	2.72497e-55
NWD2	0.504631	0.100719	-2.32489	4.41057e-18	3.5216e-17			ANXA2	3.51238	12.7767	1.863	2.74433e-41	1.92897e-39
AL160191.1	0.28042	0.126787	-1.14519	3.68593e-16	2.48916e-15			SLC12A5	8.39182	3.70876	-1.17805	2.95303e-11	1.20808e-10
WNT7B	7.78506	3.69581	-1.07482	2.08994e-17	1.58099e-16			CCSER1	0.145904	0.0674449	-1.11324	8.54833e-16	5.82227e-15
KRT31	0.189495	0.0800756	-1.24272	1.13733e-11	4.96312e-11			AC125616.1	1.04207	0.405031	-1.36335	6.12095e-14	3.39881e-13
AL354919.2	0.272367	2.01362	2.88617	4.75394e-33	1.33607e-31			ARSJ	0.504958	1.23921	1.29519	4.42481e-08	1.24544e-07
GAD2	4.17342	1.41685	-1.55854	2.11703e-14	1.20769e-13			MIR138-1	0.407465	0.156653	-1.37911	2.59061e-09	8.4266e-09
HCK	2.76299	8.87793	1.68399	2.74543e-76	4.43112e-73			RAB3A	44.3376	21.1912	-1.06507	3.68508e-16	2.62494e-15
CLEC17A	0.171075	0.761373	2.15397	4.13468e-23	5.08863e-22			ZNF812P	0.644488	1.57239	1.28674	2.44461e-16	1.76667e-15
HOXA4	0.230472	0.62323	1.43518	1.87574e-15	1.18857e-14			AL445490.1	0.12561	0.264326	1.07337	0.0250892	0.0329446
GALNTL6	0.322081	0.111035	-1.5364	6.78188e-24	8.90433e-23			EEF1B2P4	0.0468711	0.16443	1.8107	1.9712e-07	5.12171e-07
CARD16	0.550924	1.8848	1.77449	3.37179e-56	3.09711e-54			AGAP2-AS1	1.73545	3.80852	1.13392	7.82266e-09	2.39996e-08
STMN2	75.0664	22.5669	-1.73396	6.04685e-22	6.72745e-21			LRG1	0.100638	0.254612	1.33913	9.85487e-34	3.88816e-32
SLAMF6	0.0631749	0.248291	1.97461	6.25923e-28	1.14648e-26			SLC10A6	0.0847055	0.307017	1.85779	4.53614e-08	1.27505e-07
CACNB1	6.47803	3.22999	-1.00403	3.37118e-26	5.37202e-25			HLA-DRA	69.5959	380.975	2.45262	3.59901e-60	6.44356e-57
FXYD5	3.92242	9.95771	1.34407	1.25491e-59	1.36327e-57			USP30-AS1	0.106337	0.384535	1.85447	1.1698e-26	2.48124e-25
EGR4	0.9945	0.29744	-1.74137	2.04384e-11	8.69731e-11			CALHM1	0.26609	0.112861	-1.23737	2.97321e-05	5.86479e-05
AC006033.2	0.0649938	0.192285	1.56487	2.26187e-50	1.58724e-48			AL355490.2	0.156076	0.0777036	-1.00619	2.37343e-16	1.71905e-15
FES	1.50975	3.04037	1.00993	1.08121e-45	6.36225e-44			KCNIP2	28.8625	9.47886	-1.60641	2.66568e-32	9.39735e-31
RNASE4	0.0991093	0.233923	1.23894	6.20327e-33	1.72835e-31			NCF1C	0.350958	0.973006	1.47115	4.35294e-41	3.00419e-39
SYN2	22.8265	7.70517	-1.56681	1.38377e-18	1.15379e-17			NMI	1.48368	3.11272	1.069	4.15335e-35	1.85673e-33
LHX6	1.12094	0.411877	-1.44443	8.32517e-10	2.99261e-09			RUNDC3A-AS1	0.817473	0.367002	-1.15538	4.96358e-39	3.03177e-37
AC138207.5	1.53935	4.07167	1.4033	5.68674e-56	5.18135e-54			S100A8	2.02387	5.24455	1.3737	3.60853e-17	2.87725e-16
TMEM171	0.479215	0.149917	-1.67651	0.000627074	0.00111316			TPPP3	12.434	26.7246	1.10388	2.6645e-05	5.28184e-05
CLEC2B	0.704879	1.78722	1.34227	7.14613e-46	4.22707e-44			MT1DP	0.248797	0.668007	1.42489	8.15157e-06	1.72805e-05
AC025811.1	0.229355	0.0578182	-1.98799	7.59248e-24	9.91674e-23			RPH3A	9.507	4.39228	-1.11402	1.20989e-14	7.25047e-14
TCIRG1	2.33595	5.59734	1.26073	3.48873e-44	1.89955e-42			AC008761.2	0.184134	0.080922	-1.18616	2.10435e-21	2.64131e-20
PRKAR1B	40.7439	19.0417	-1.09742	3.08603e-21	3.23582e-20			GAPDHP15	0.153269	0.0712129	-1.10586	2.96578e-07	7.55298e-07
RAB6D	0.252244	0.110795	-1.18693	4.5224e-23	5.52966e-22			SLC44A3-AS1	0.25224	0.702018	1.47671	1.98842e-29	5.40756e-28
MIR124-2	1.18767	0.414421	-1.51897	1.3953e-24	1.94569e-23			BNIP3P30	0.375044	0.168079	-1.15792	4.00252e-11	1.61408e-10
VASH2	0.560521	0.253861	-1.14273	8.31385e-27	1.39777e-25			GPR132	0.315472	0.912384	1.53213	1.44153e-49	2.28683e-47
MYOF	1.76158	4.43274	1.33133	4.58767e-34	1.39145e-32			AC104574.2	0.0315497	0.179723	2.51008	3.67325e-29	9.77991e-28
MIR4527HG	0.14108	0.067288	-1.06809	1.12545e-08	3.5838e-08			RPL7AP28	0.184702	0.54838	1.56998	0.00365094	0.00543832
MMP7	0.160758	0.829719	2.36773	1.49868e-22	1.76284e-21			CFAP45	0.0889657	1.1415	3.68154	3.78566e-13	1.91836e-12
FCN1	0.0785471	0.187065	1.25191	8.07712e-09	2.61364e-08			TMEM150B	0.130683	0.333575	1.35194	2.17478e-26	4.47977e-25
C1R	6.39885	26.7762	2.06507	6.61633e-36	2.30358e-34			RBFOX1	4.77785	2.09638	-1.18846	1.88665e-07	4.916e-07
CCDC146	1.65118	3.33268	1.01318	2.10859e-23	2.66177e-22			AL135999.3	0.476654	0.192787	-1.30594	9.75393e-27	2.08056e-25
HSPA7	0.454001	2.26684	2.31992	1.24337e-23	1.59813e-22			2020-03-04	5.19668	1.64557	-1.659	1.22913e-23	1.94314e-22
RFPL2	0.400089	0.109165	-1.87381	3.71132e-17	2.73163e-16			INMT	0.256007	1.31504	2.36085	1.02872e-32	3.79033e-31
ATP2B3	3.63695	0.994415	-1.87081	1.547e-23	1.97715e-22			HSF4	5.02453	2.33706	-1.1043	9.4844e-26	1.82683e-24
HUNK	1.76366	0.872752	-1.01493	2.28453e-23	2.87424e-22			HTR1E	0.372084	0.162263	-1.1973	6.33823e-07	1.54691e-06
KLHL34	0.183517	0.0902091	-1.02457	4.35506e-11	1.78922e-10			PTGER4	0.283137	1.06805	1.9154	1.01125e-52	2.71777e-50
SMCR5	0.25443	0.0996693	-1.35205	2.43695e-27	4.26533e-26			SPINT1	0.260257	0.702527	1.43261	2.26784e-47	2.7704e-45
AC106865.1	0.106309	0.479499	2.17326	2.62571e-26	4.2379e-25			JAK3	0.494603	1.4385	1.54022	1.21654e-27	2.84158e-26
AC012213.4	3.41378	1.45859	-1.22679	7.0005e-26	1.09318e-24			EMB	0.677116	1.80503	1.41455	1.29935e-42	1.03785e-40
RARRES3	15.2581	37.7437	1.30666	5.79466e-49	3.82854e-47			AC131097.4	0.138824	0.490092	1.8198	7.53548e-14	4.14197e-13
LINC01141	0.636357	1.31265	1.04457	1.05235e-24	1.48617e-23			KCNK3	5.31797	2.03967	-1.38254	5.82876e-25	1.04844e-23
TNFRSF1A	10.2789	23.0133	1.16279	1.15369e-45	6.77109e-44			AC068587.3	0.311097	0.13201	-1.23671	6.57806e-07	1.60099e-06
C19orf84	0.113921	0.259683	1.18872	2.68338e-32	7.14178e-31			AC096921.2	0.0828622	0.179395	1.11435	4.66433e-41	3.2094e-39
ANKRD62P1-PARP4P3	0.45559	0.932692	1.03366	1.46368e-05	3.24726e-05			MIR124-2HG	2.56588	1.01234	-1.34177	2.64764e-32	9.34829e-31
C1QL3	3.1569	0.907077	-1.79921	5.83913e-14	3.1916e-13			OLFML3	7.2987	20.4178	1.48412	8.75733e-56	4.44561e-53
AP000282.1	0.661357	0.307986	-1.10257	1.13861e-17	8.81097e-17			SERPING1	7.86618	32.8948	2.06413	7.88632e-39	4.7161e-37
SHISAL2A	0.134059	0.32671	1.28514	1.84782e-27	3.24928e-26			PLCG2	0.528854	1.22901	1.21656	8.75733e-56	4.44561e-53
COL3A1	6.78705	15.3214	1.17469	1.25126e-08	3.95986e-08			AP001271.1	0.18915	0.0871945	-1.11722	2.03242e-14	1.19201e-13
PDCD1LG2	0.356777	1.36403	1.93478	7.91204e-55	6.84983e-53			ZNF676	0.706338	0.337893	-1.06379	2.45449e-10	9.03487e-10
LPCAT2	1.63647	4.40952	1.43003	9.04851e-50	6.19576e-48			CSF1R	22.1033	52.9478	1.26031	2.32852e-39	1.44154e-37
AC133065.3	0.557969	1.57328	1.49552	7.57176e-35	2.4372e-33			C1orf158	0.0736109	0.785557	3.41572	1.37907e-08	4.11433e-08
NABP1	0.297575	0.612848	1.04228	1.13596e-30	2.60326e-29			PRR29	0.40938	1.16477	1.50853	5.44516e-07	1.33939e-06
AL161645.1	0.187402	0.0784674	-1.25597	5.21981e-20	4.94536e-19			GPR1	0.0968893	0.231966	1.2595	0.000111999	0.000205073
CHI3L2	3.47478	21.6587	2.63996	1.62469e-41	7.77785e-40			CCL4	6.62997	17.085	1.36566	7.07039e-08	1.93757e-07
CREG2	8.59796	2.30528	-1.89905	1.30514e-14	7.58709e-14			ZNF474	0.122367	0.425348	1.79743	1.66879e-18	1.57009e-17
AC097468.2	0.6074	0.17995	-1.75505	1.74725e-34	5.50639e-33			MPEG1	2.46824	5.02136	1.02459	4.79301e-26	9.56258e-25
PTPN7	0.158658	0.702439	2.14645	1.94463e-52	1.48952e-50			EBI3	3.08745	6.68367	1.11423	1.32327e-35	6.14406e-34
AC004066.2	0.215977	0.0437483	-2.30358	1.54085e-15	9.84091e-15			NEFL	35.1061	14.985	-1.22821	1.38389e-06	3.22753e-06
CCNYL2	0.155598	0.0659401	-1.23859	2.36935e-19	2.11029e-18			VNN1	0.111538	0.379047	1.76484	6.24765e-36	2.99206e-34
AC245519.1	0.17805	0.0629861	-1.49917	2.48819e-10	9.4334e-10			PYGL	3.15299	7.97241	1.33829	2.91863e-41	2.03893e-39
INHBA-AS1	0.454564	0.153343	-1.56772	3.48935e-22	3.96208e-21			HLA-DRB1	36.3418	189.682	2.38388	1.08594e-58	1.55044e-55
ST8SIA2	1.42577	0.586474	-1.2816	1.74971e-15	1.11276e-14			LOX	0.519487	1.35451	1.38261	4.64094e-13	2.32189e-12
DOC2A	3.8801	1.21471	-1.67548	1.60061e-19	1.44612e-18			FILIP1L	1.53995	3.85459	1.3237	9.63527e-27	2.05901e-25
LINC01166	0.225278	0.0788105	-1.51524	2.3798e-24	3.25705e-23			NSG2	77.576	34.7359	-1.15918	6.37019e-25	1.14223e-23
GBGT1	0.865073	2.07979	1.26554	6.58491e-64	1.07045e-61			AP000924.1	0.570135	1.95204	1.77561	2.31709e-27	5.26682e-26
SAA1	0.175082	4.29673	4.61714	1.74916e-08	5.43756e-08			AL606970.4	0.0523667	0.330036	2.6559	3.6077e-16	2.57223e-15
LILRB1	0.686299	2.5234	1.87846	1.11261e-69	3.64356e-67			MYO1G	0.115058	0.414472	1.84891	4.05565e-32	1.39951e-30
AC011899.3	0.0543485	0.211524	1.96051	3.08939e-38	1.2578e-36			GCK	0.411075	0.98505	1.2608	1.46221e-15	9.67071e-15
AC073525.1	0.17706	0.0342034	-2.37203	4.42709e-31	1.05633e-29			PTGS2	0.546162	1.34874	1.30421	3.14258e-08	9.00288e-08
ARHGAP44	2.90152	1.20447	-1.26841	5.20797e-25	7.53871e-24			ALX4	0.188325	0.478914	1.34654	1.3613e-05	2.79956e-05
IGHG3	0.227846	3.37056	3.88686	7.94601e-08	2.29983e-07			GRIP2	0.647638	0.301898	-1.10112	1.50899e-21	1.92255e-20
CA7	1.18117	0.353173	-1.74177	4.91448e-15	2.98275e-14			PLAUR	0.76346	2.48417	1.70214	6.41841e-42	4.83902e-40
ATP6V0A4	0.40746	0.162191	-1.32896	0.00199434	0.00328734			ADA2	2.86663	7.73851	1.4327	2.5259e-56	1.47953e-53
CLEC4G	0.445099	0.197213	-1.17438	1.4683e-13	7.70497e-13			IL13RA2	1.29608	4.75175	1.87431	0.00012346	0.000224835
RGS1	7.11354	22.2681	1.64634	1.95471e-31	4.8114e-30			BATF	0.245425	1.08943	2.15021	2.74618e-44	2.52959e-42
MMEL1	0.169649	0.625897	1.88337	1.23008e-33	3.60972e-32			RNU6-178P	0.31276	0.155342	-1.00961	5.29399e-12	2.35651e-11
TNFSF14	0.0374075	0.193193	2.36864	1.41608e-30	3.21263e-29			IGLV3-21	0.141358	1.95153	3.78718	8.26118e-08	2.24291e-07
C15orf48	0.0999999	0.34252	1.77619	8.76789e-15	5.19589e-14			NSUN7	0.135544	0.467852	1.78729	4.87152e-22	6.54618e-21
BST2	21.044	58.908	1.48505	1.26972e-49	8.56436e-48			ODF3B	1.08046	2.73539	1.34011	1.75996e-10	6.58659e-10
SIGLEC1	0.777452	2.29506	1.5617	7.17071e-17	5.17005e-16			PLA2R1	0.132361	0.322956	1.28686	1.26295e-09	4.25529e-09
RASAL3	0.842701	2.50663	1.57265	5.56702e-68	1.47991e-65			VSTM2A-OT1	0.62923	0.303636	-1.05124	6.19105e-23	9.11265e-22
CACNA1E	2.44989	0.994286	-1.30098	1.76713e-26	2.89348e-25			CAMK4	2.83228	1.31822	-1.10337	2.04532e-15	1.33115e-14
BTK	0.973711	2.96446	1.60621	3.5004e-72	1.68287e-69			IGHV3-74	0.0610216	0.496227	3.02361	8.8261e-08	2.38664e-07
CLIC1	13.2155	36.965	1.48393	1.33696e-52	1.04172e-50			SHISAL2B	1.27729	0.267577	-2.25506	3.90473e-17	3.09292e-16
ANXA2	3.82701	12.4609	1.70312	5.13523e-35	1.68168e-33			C20orf204	1.01031	0.383262	-1.3984	9.77346e-28	2.30407e-26
SLC12A5	9.63052	2.46537	-1.96581	2.8314e-19	2.50502e-18			GJD2	1.2387	0.502996	-1.30021	1.33811e-13	7.11706e-13
CCSER1	0.165173	0.0481031	-1.77978	3.08216e-34	9.54035e-33			AC010719.1	0.105978	0.239834	1.17827	0.00663357	0.00949422
AC125616.1	1.12345	0.323339	-1.79682	8.99198e-19	7.63558e-18			ISX-AS1	1.14491	0.401225	-1.51275	1.80766e-16	1.33078e-15
LINC02298	0.50589	0.214503	-1.23783	1.46287e-24	2.03415e-23			EMX1	0.963953	0.471641	-1.03127	5.24319e-06	1.14104e-05
MIR138-1	0.417777	0.146302	-1.51378	1.5706e-10	6.07695e-10			CTSH	11.6185	24.7302	1.08985	3.35509e-25	6.14624e-24
RAB3A	49.2365	16.2738	-1.59717	2.19245e-24	3.01708e-23			GPR22	1.10247	0.535316	-1.04228	4.63294e-09	1.45979e-08
ZNF812P	0.618066	1.59892	1.37126	1.05456e-19	9.68655e-19			TIMP1	9.80175	59.5577	2.60318	5.59121e-28	1.34732e-26
AL445490.1	0.122446	0.267502	1.1274	0.0170747	0.0243376			IL1B	1.88693	5.33365	1.49908	6.11286e-14	3.39514e-13
AC104072.1	5.62239	2.35128	-1.25773	1.53013e-07	4.27167e-07			PRAME	0.259672	1.00276	1.94922	0.00335293	0.00501929
EEF1B2P4	0.0628957	0.148344	1.23792	0.00202621	0.00333655			CCR1	2.10828	6.655	1.65837	6.77742e-51	1.38235e-48
AC073941.1	0.398732	0.804489	1.01265	2.22922e-10	8.49007e-10			PLSCR1	2.71802	7.64953	1.49282	9.46627e-51	1.84827e-48
PI3	0.363268	0.74764	1.04131	0.000205541	0.00039032			AC068533.2	0.0723463	0.252136	1.80121	0.00012648	0.000229967
GPR17	66.4245	28.965	-1.1974	3.31556e-11	1.38048e-10			LSP1	0.782139	2.75387	1.81597	1.15171e-31	3.86908e-30
LRG1	0.0998923	0.255361	1.35409	3.70846e-35	1.22509e-33			KRT222	0.94749	0.389432	-1.28274	1.91899e-13	1.00108e-12
SLC10A6	0.0892639	0.302441	1.76051	1.40721e-05	3.1278e-05			SOD3	1.73196	5.92823	1.7752	7.72554e-18	6.66977e-17
HLA-DRA	70.7063	379.86	2.42556	2.86626e-56	2.67628e-54			FAM177B	0.151729	0.473439	1.64168	6.69245e-39	4.03384e-37
USP30-AS1	0.102704	0.388181	1.91824	2.20526e-29	4.57577e-28			RASSF10	0.180325	0.496291	1.46059	1.49089e-07	3.93233e-07
CALHM1	0.304713	0.0740914	-2.04008	8.5108e-11	3.38992e-10			CAPG	8.59606	28.1854	1.7132	1.84717e-42	1.45506e-40
KCNIP2	28.9954	9.34546	-1.63349	2.13211e-35	7.17991e-34			C1orf87	0.0401009	0.306868	2.93591	3.35406e-28	8.2654e-27
DBH	0.318855	0.147565	-1.11155	4.03405e-11	1.66551e-10			GZMB	0.1452	0.337605	1.21729	7.63365e-13	3.72216e-12
NCF1C	0.301692	1.02246	1.76089	1.37718e-59	1.48894e-57			LYPD8	0.420928	0.189458	-1.15169	4.07592e-07	1.01894e-06
DUSP27	0.242857	0.505765	1.05836	3.79399e-22	4.29289e-21			AL121827.1	0.389043	0.136075	-1.51552	1.34455e-29	3.70505e-28
NMI	1.46586	3.1306	1.0947	7.17554e-38	2.85455e-36			TBR1	1.45642	0.605705	-1.26574	1.47982e-06	3.44036e-06
RUNDC3A-AS1	0.822504	0.361953	-1.18422	1.07248e-39	4.72392e-38			ST6GAL2	7.41381	3.58272	-1.04916	1.57055e-18	1.48194e-17
S100A8	1.89907	5.36982	1.49958	1.09562e-18	9.22377e-18			LINC01349	0.126604	0.301276	1.25076	3.35745e-13	1.7143e-12
LINC00643	4.26341	2.12875	-1.002	8.98787e-17	6.41269e-16			ANKRD45	0.527166	1.31389	1.31751	9.60078e-11	3.70724e-10
TEKT2	1.1973	2.57603	1.10536	3.41457e-13	1.72415e-12			OSCAR	1.01199	2.64596	1.3866	4.20486e-45	4.12256e-43
C4orf50	0.520569	0.175718	-1.56683	5.56289e-11	2.26048e-10			A2M	64.6198	134.238	1.05475	3.96662e-52	9.95752e-50
RPH3A	10.5883	3.30688	-1.67893	3.97354e-29	8.09613e-28			AC087273.2	0.600023	1.21204	1.01435	5.76785e-20	6.24163e-19
AC008761.2	0.180581	0.0844888	-1.09581	2.9865e-18	2.42048e-17			IL15RA	0.480033	1.00735	1.06936	6.23187e-34	2.50635e-32
GAPDHP15	0.15037	0.0741229	-1.02052	2.79948e-07	7.62592e-07			AC025171.5	0.257667	0.55204	1.09926	0.000487418	0.000818478
SLC44A3-AS1	0.306173	0.647881	1.08138	1.15025e-16	8.16043e-16			OTP	0.0966475	0.303705	1.65187	0.0151138	0.0205073
GPR132	0.292471	0.935472	1.6774	4.16184e-61	5.31305e-59			SLN	1.97355	12.0064	2.60493	1.35319e-09	4.54325e-09
AC104574.2	0.0509689	0.16023	1.65246	5.35984e-16	3.56523e-15			COL8A2	0.927548	3.61048	1.9607	5.19472e-49	7.55848e-47
TYRP1	0.2224	0.0700771	-1.66614	1.48988e-06	3.7154e-06			AC123912.4	0.312753	0.653632	1.06345	0.00951631	0.0133099
CFAP45	0.173519	1.05663	2.6063	2.47379e-05	5.31955e-05			GABRA3	11.6552	5.62822	-1.05022	3.53907e-26	7.16725e-25
TMEM150B	0.110706	0.353628	1.6755	1.07696e-44	6.03848e-43			SP140L	0.517465	1.24821	1.27033	5.0653e-49	7.41741e-47
CLEC2L	3.22342	1.19425	-1.43248	1.8052e-14	1.03713e-13			C11orf21	0.0677282	0.183078	1.43463	6.30771e-20	6.79686e-19
RBFOX1	5.47838	1.39319	-1.97535	3.73628e-15	2.29728e-14			CFB	0.182341	0.378688	1.05437	2.11454e-28	5.29076e-27
AL135999.3	0.485831	0.183575	-1.40408	7.61768e-30	1.62386e-28			IL10RA	1.58992	4.20874	1.40444	1.4691e-43	1.26642e-41
2020-03-04	5.39741	1.44408	-1.90212	2.22834e-33	6.41421e-32			FTL	965.921	2087	1.11145	2.10527e-47	2.58563e-45
INMT	0.287208	1.28372	2.16016	1.56166e-25	2.37146e-24			CEBPD	8.6119	17.519	1.02452	4.87403e-17	3.81833e-16
HTR1E	0.434246	0.0998661	-2.12045	5.55149e-15	3.34778e-14			F11R	1.22472	2.5295	1.0464	7.66698e-38	4.15034e-36
PTGER4	0.318687	1.03236	1.69574	4.63214e-42	2.27045e-40			TGFBR2	6.32028	13.7777	1.12427	4.48365e-53	1.28031e-50
SPINT1	0.248429	0.7144	1.5239	8.1574e-59	8.37839e-57			HLA-DPA3	0.117985	0.279915	1.24639	4.30996e-07	1.07275e-06
P2RX5	0.526462	0.257157	-1.03368	7.86216e-16	5.15685e-15			SH2D5	2.49637	1.1389	-1.13218	1.64296e-07	4.30855e-07
JAK3	0.511169	1.42187	1.47591	1.1357e-27	2.03669e-26			LY86-AS1	0.426329	0.17033	-1.32363	1.51667e-05	3.09844e-05
EMB	0.700901	1.78115	1.34553	2.8767e-36	1.03178e-34			GIMAP4	6.10114	13.3926	1.13429	8.17324e-50	1.36284e-47
LINC01018	0.628892	0.258291	-1.28382	4.70964e-08	1.39658e-07			HRH3	5.84416	2.37876	-1.29679	4.09324e-24	6.74646e-23
AC131097.4	0.185982	0.442755	1.25135	6.77421e-09	2.21136e-08			OLFML2B	2.77278	7.32788	1.40206	4.34726e-29	1.14279e-27
DRD5	0.347616	0.129838	-1.42078	4.14229e-11	1.70802e-10			PCED1B-AS1	1.04984	2.94376	1.48749	2.55002e-50	4.58683e-48
KCNK3	5.58398	1.77264	-1.65539	2.35469e-33	6.76927e-32			AC079061.1	0.303101	0.138633	-1.12853	2.72806e-18	2.50582e-17
AC096921.2	0.0871069	0.175134	1.0076	3.17306e-35	1.05439e-33			PLAC8	0.139386	0.641059	2.20137	2.90808e-25	5.35311e-24
MIR124-2HG	2.59555	0.982554	-1.40143	1.30189e-34	4.12587e-33			ARL11	0.282184	0.788242	1.482	7.65718e-54	2.69109e-51
OLFML3	7.36975	20.3465	1.46509	6.26195e-57	5.94517e-55			TNFAIP8L2	3.06079	7.58747	1.30972	1.34578e-45	1.38482e-43
SERPING1	9.31507	31.4405	1.75498	3.2058e-21	3.35207e-20			AL031658.2	0.960235	0.377729	-1.34604	8.31791e-22	1.09266e-20
PLCG2	0.515483	1.24244	1.26917	2.06735e-64	3.51232e-62			RYR2	1.19945	0.567871	-1.07874	2.03791e-05	4.10529e-05
AP001271.1	0.190667	0.0856725	-1.15415	3.25652e-16	2.20643e-15			CD2	0.14517	0.91419	2.65476	4.63232e-40	2.98087e-38
ZNF676	0.771883	0.2721	-1.50424	4.56322e-14	2.52474e-13			TRPM8	0.0711887	0.640041	3.16844	5.3158e-13	2.63987e-12
CSF1R	18.2274	56.8383	1.64075	1.79403e-62	2.54955e-60			ADAMTS1	2.02249	4.56897	1.17574	2.30963e-16	1.67815e-15
C1orf158	0.124405	0.73457	2.56186	6.48179e-06	1.49926e-05			FHAD1	0.0868806	0.21285	1.29273	5.36525e-07	1.32101e-06
ANKRD34A	2.76058	1.12837	-1.29073	7.459e-21	7.62296e-20			VAMP8	8.42557	22.402	1.41078	1.70009e-54	6.69602e-52
CACNG8	5.74086	2.61637	-1.1337	8.16504e-23	9.80846e-22			PLEK2	0.155713	0.409533	1.39509	1.03966e-17	8.81272e-17
CCL4	5.83008	17.8879	1.6174	1.44038e-12	6.87366e-12			HCLS1	5.4532	15.5311	1.50999	1.37925e-50	2.64769e-48
ZNF474	0.140113	0.407534	1.54033	1.11405e-17	8.62683e-17			CD300C	0.648449	1.87913	1.535	2.3633e-53	7.39551e-51
MPEG1	2.23572	5.25476	1.23288	5.29045e-37	1.97592e-35			SERPINA5	0.134655	2.0785	3.94821	7.53512e-31	2.33242e-29
EBI3	2.51598	7.2573	1.52831	2.52442e-66	5.59234e-64			HLA-F	3.64408	7.61495	1.06328	2.55313e-31	8.30823e-30
NEFL	39.7441	10.3293	-1.94399	4.18426e-14	2.3219e-13			SIRPB1	0.111278	0.312374	1.48911	6.62368e-18	5.77304e-17
VNN1	0.109358	0.381235	1.80163	8.01277e-38	3.17643e-36			PYDC1	0.400892	0.195909	-1.03303	2.58823e-08	7.49373e-08
PYGL	3.30847	7.81635	1.24033	4.05863e-42	1.99801e-40			GMNC	0.0292606	0.311564	3.4125	5.81811e-07	1.42576e-06
HLA-DRB1	36.1469	189.878	2.39313	8.80445e-55	7.59333e-53			RAB11FIP1	0.101761	0.220159	1.11337	8.95123e-24	1.43295e-22
LOX	0.619558	1.25406	1.01729	2.15794e-10	8.22828e-10			HLA-DPA1	7.9492	40.1305	2.33582	3.84124e-55	1.82811e-52
NSG2	79.7723	32.5314	-1.29406	6.91913e-31	1.61346e-29			RNU4-62P	0.389663	0.84934	1.12411	1.57311e-10	5.9203e-10
AP000924.1	0.495141	2.02732	2.03366	2.69831e-39	1.15257e-37			WNT4	0.249038	0.518652	1.0584	0.000453328	0.000764099
AL606970.4	0.102619	0.279593	1.44603	8.4391e-11	3.36314e-10			KRT75	0.0208527	0.204696	3.29518	1.50379e-05	3.07379e-05
MYO3B	0.148365	0.0653756	-1.18232	2.84654e-11	1.19244e-10			NKX2-5	0.19647	0.464627	1.24176	5.2865e-06	1.1497e-05
SMIM10L2B	6.40232	2.43874	-1.39246	1.95181e-21	2.07349e-20			DIRAS3	1.90797	6.23088	1.7074	6.01127e-21	7.15961e-20
MYO1G	0.112523	0.417017	1.88989	6.8575e-36	2.38388e-34			COL4A1	5.78254	20.0493	1.79378	8.15907e-20	8.68526e-19
KCNK9	0.893764	0.408078	-1.13105	7.16046e-08	2.08341e-07			RAB42	0.425316	1.17049	1.4605	7.04105e-27	1.53041e-25
KCTD16	1.34757	0.475576	-1.50261	8.86119e-21	8.98687e-20			SNCB	52.1405	22.4321	-1.21684	5.96694e-18	5.22656e-17
ANK3	3.30668	1.32734	-1.31684	5.4143e-31	1.27839e-29			GABRB3	8.28014	4.11079	-1.01024	3.25047e-26	6.6062e-25
GRIP2	0.722719	0.226532	-1.67372	4.2198e-38	1.70269e-36			NGB	2.27878	0.85499	-1.41428	6.49222e-09	2.01042e-08
PLAUR	0.790165	2.45736	1.63688	1.52961e-38	6.33024e-37			MIR7848	0.103652	0.234084	1.17527	2.59058e-07	6.65009e-07
ADA2	2.98339	7.6213	1.35308	7.51384e-53	5.87484e-51			AL513217.1	2.56854	0.948342	-1.43747	3.03319e-29	8.1041e-28
AC004899.1	0.25758	0.122961	-1.06682	1.20288e-07	3.4005e-07			CP	1.00296	5.96929	2.5733	3.29324e-40	2.15561e-38
KCNA4	0.604334	0.269096	-1.16722	9.75102e-17	6.93747e-16			LINC02051	0.894932	0.411866	-1.1196	1.56105e-12	7.33304e-12
BATF	0.223714	1.11122	2.31242	8.35768e-52	6.23267e-50			TTC12	0.388936	0.84582	1.12082	1.82341e-13	9.53837e-13
IGLV3-21	0.101092	1.99195	4.30044	1.70912e-07	4.75023e-07			OAS3	3.26516	6.8957	1.07854	9.73641e-09	2.95612e-08
MFSD4A	6.46483	2.22486	-1.5389	2.20531e-24	3.02926e-23			UBD	0.245152	0.966587	1.97922	3.0664e-22	4.22746e-21
NSUN7	0.193337	0.40984	1.08394	3.22585e-20	3.11634e-19			SCIN	0.880378	4.29387	2.28608	2.70294e-51	5.77065e-49
ODF3B	0.935097	2.88131	1.62353	2.57604e-23	3.22483e-22			AL161621.1	0.257078	0.115359	-1.15608	5.79293e-05	0.000110067
FRMPD1	1.52002	0.746162	-1.02653	4.16883e-30	9.07504e-29			TNC	14.9425	39.6603	1.40827	5.28062e-26	1.04442e-24
C1orf115	12.6356	4.31836	-1.54894	6.6476e-13	3.25975e-12			HLA-DQB1	2.65991	12.9072	2.27873	1.49589e-38	8.62935e-37
VSTM2A-OT1	0.683661	0.248998	-1.45714	1.62001e-31	4.00501e-30			CCR7	0.0836241	0.218987	1.38885	4.23166e-13	2.12972e-12
DOK6	4.21559	1.67484	-1.33171	2.45516e-36	8.89052e-35			ATP2A3	0.375583	0.751429	1.00051	1.70831e-29	4.67922e-28
CBLN4	2.58776	0.879582	-1.55681	4.44329e-10	1.64257e-09			SYT13	8.76693	4.17307	-1.07096	1.15345e-12	5.50899e-12
CAMK4	3.23443	0.914542	-1.82239	9.52917e-36	3.27734e-34			CRYBG1	0.231408	0.704609	1.60638	1.19395e-27	2.79452e-26
IGHV3-74	0.0459896	0.511316	3.47484	1.98853e-08	6.14592e-08			KLHL6	0.392517	0.942438	1.26364	1.74832e-34	7.39603e-33
SHISAL2B	1.24698	0.298004	-2.06503	7.49832e-17	5.3805e-16			AC010247.2	0.106444	0.251199	1.23874	6.5423e-34	2.61738e-32
C20orf204	0.959054	0.434715	-1.14154	2.74757e-17	2.05101e-16			LINC00958	0.0587283	0.157513	1.42335	2.18398e-08	6.375e-08
AP005264.3	0.179675	0.0670106	-1.42293	1.4541e-05	3.2279e-05			XIRP1	0.102274	0.2322	1.18293	4.68734e-14	2.64128e-13
GJD2	1.38715	0.35399	-1.97034	1.43938e-23	1.84588e-22			THBS1	0.921907	3.50586	1.92707	2.38644e-11	9.86713e-11
ISX-AS1	1.20901	0.33688	-1.84352	1.22681e-21	1.32699e-20			SLAMF7	0.0806797	0.216104	1.42145	1.47318e-18	1.39294e-17
EMX1	1.12747	0.307504	-1.87441	1.13925e-12	5.47608e-12			EYA4	0.192945	0.657001	1.76771	0.0114203	0.015794
CTSH	10.8147	25.5371	1.2396	4.49275e-34	1.36449e-32			LINC02151	0.612704	0.17386	-1.81726	9.08827e-16	6.17159e-15
FO393401.1	0.137827	0.315843	1.19635	1.75506e-41	8.3665e-40			FCAR	0.112563	0.349032	1.63263	8.28237e-22	1.08907e-20
XKR4	1.14215	0.561293	-1.02493	7.16283e-30	1.53268e-28			AC074286.1	1.75178	0.867521	-1.01385	1.01727e-18	9.79286e-18
MRAP2	3.57935	1.69732	-1.07644	7.31427e-11	2.93038e-10			IRF1	1.42715	3.24156	1.18356	1.71003e-31	5.67789e-30
GPR22	1.31154	0.325454	-2.01074	1.75542e-22	2.05202e-21			CD19	0.0639848	0.146009	1.19026	1.18292e-31	3.96808e-30
TIMP1	15.0861	54.2534	1.8465	2.36153e-12	1.10342e-11			CCL1	0.211967	0.0831155	-1.35065	0.000172242	0.000307326
IL1B	1.95446	5.26587	1.4299	6.90115e-16	4.55162e-15			LINC02285	0.182695	0.529018	1.53388	5.50954e-49	7.96582e-47
FAR2P3	0.203423	0.0806883	-1.33405	3.46459e-13	1.74823e-12			CKMT1B	1.85042	0.855986	-1.1122	2.29742e-27	5.22733e-26
DNASE2B	0.189884	0.416988	1.13488	5.24186e-18	4.15742e-17			ANG	0.521166	1.58651	1.60604	2.79042e-44	2.56001e-42
CCR1	1.87073	6.89344	1.88162	9.38318e-66	1.91011e-63			MX1	3.14966	9.62657	1.61182	1.95727e-23	3.01495e-22
PLSCR1	2.8144	7.55277	1.42418	1.81956e-40	8.306e-39			MIR486-1	0.418493	0.176663	-1.24421	1.1699e-12	5.57935e-12
UMODL1-AS1	0.47553	0.204966	-1.21415	2.48311e-10	9.41574e-10			IGFBP7	90.5095	187.027	1.04711	7.20705e-35	3.15398e-33
LSP1	0.852189	2.68356	1.6549	4.01917e-23	4.95456e-22			HFE	0.384221	0.961859	1.32389	1.72818e-41	1.25328e-39
AC087457.1	0.154682	0.0617319	-1.32521	3.23031e-16	2.18933e-15			AC138207.6	0.258243	0.554652	1.10285	6.21437e-35	2.73528e-33
OBSCN-AS1	0.274593	0.122567	-1.16372	2.46237e-19	2.18882e-18			THEMIS2	2.75376	6.33723	1.20245	9.19471e-36	4.32189e-34
KRT222	1.07874	0.257688	-2.06564	1.52911e-25	2.32359e-24			AC098613.1	0.416967	1.40738	1.75501	9.02576e-45	8.69976e-43
FAM177B	0.129532	0.495721	1.93622	9.90952e-62	1.34081e-59			HK2	3.41547	6.86042	1.00621	2.00119e-30	5.96803e-29
CAPG	8.45527	28.3267	1.74424	2.94884e-45	1.69547e-43			PARVG	0.950703	2.53083	1.41255	5.64478e-46	6.08251e-44
C1orf87	0.0676439	0.279221	2.04538	1.12514e-20	1.13145e-19			STXBP2	0.925928	2.00685	1.11596	1.44199e-37	7.71446e-36
ATP2B2	15.0913	7.19974	-1.06771	7.82377e-20	7.28113e-19			AL356417.2	0.07144	0.182713	1.35477	2.21788e-09	7.26698e-09
RIMS4	11.3918	5.60073	-1.02431	4.62915e-28	8.62327e-27			CARMIL2	1.37718	0.655864	-1.07025	4.38461e-16	3.0962e-15
GZMB	0.157882	0.324876	1.04104	5.34666e-07	1.4071e-06			MYBPH	0.129618	0.818684	2.65904	2.25127e-33	8.67252e-32
GPX1P1	1.37438	2.74883	1.00003	5.59092e-09	1.84292e-08			AL445623.1	0.169971	0.36139	1.08827	5.38444e-05	0.000102622
HSPB3	1.23559	0.474452	-1.38086	3.33711e-10	1.24968e-09			CMTM7	0.981009	2.32438	1.24451	2.31437e-52	6.00789e-50
LYPD8	0.486259	0.123879	-1.97279	5.86216e-14	3.20342e-13			MSX2P1	0.193047	0.0820158	-1.23498	2.22479e-15	1.44138e-14
AL121827.1	0.394529	0.130569	-1.59532	2.7368e-34	8.48296e-33			MUC6	0.177689	0.0590728	-1.58879	2.74757e-17	2.22022e-16
TBR1	1.64827	0.413132	-1.99628	5.15912e-14	2.83639e-13			AP001257.1	0.0584608	0.148951	1.34929	4.06116e-17	3.21126e-16
ST6GAL2	7.39908	3.5975	-1.04035	2.02572e-23	2.56433e-22			GPR179	0.754276	0.342879	-1.13739	1.13445e-20	1.31683e-19
LINC01349	0.121976	0.305922	1.32656	1.16903e-19	1.06815e-18			SMIM3	4.76818	10.216	1.09932	6.1413e-31	1.92974e-29
OSCAR	0.933126	2.72513	1.54618	2.15088e-59	2.26052e-57			PRDM12	0.177189	0.0857037	-1.04786	5.22881e-12	2.32976e-11
A2M	64.5095	134.349	1.0584	7.84188e-55	6.81519e-53			RNASET2	5.04609	10.4479	1.04997	6.27536e-34	2.51499e-32
AC087273.2	0.526683	1.28566	1.2875	1.14782e-31	2.87541e-30			AC009495.3	0.0503601	0.188325	1.90287	0.000123217	0.00022441
IL15RA	0.44924	1.03826	1.20861	2.23067e-47	1.39624e-45			FAM114A1	1.57474	3.62443	1.20264	8.79603e-37	4.4455e-35
AMZ1	3.20623	1.60057	-1.00229	3.71239e-21	3.8746e-20			FTLP2	0.402308	0.808647	1.00721	5.75699e-21	6.87111e-20
SLN	1.70312	12.2778	2.8498	2.55714e-10	9.68671e-10			EVA1C	1.50223	3.60763	1.26395	2.40535e-29	6.50271e-28
COL8A2	0.862558	3.67571	2.09133	6.01348e-60	6.79403e-58			FCGR1A	2.08673	6.08334	1.54362	7.87524e-45	7.62297e-43
AL159163.1	0.115638	0.263796	1.1898	3.48337e-33	9.90065e-32			GRIN3A	2.89668	1.09427	-1.40444	2.47515e-19	2.5052e-18
RUNDC3A	39.4346	18.6857	-1.07753	4.8899e-39	2.06914e-37			GIMAP2	1.95172	4.20055	1.10583	1.45541e-42	1.15442e-40
GABRA3	12.359	4.92172	-1.32833	8.0844e-36	2.79747e-34			ADAMTSL4	0.420571	0.922553	1.13328	2.02546e-14	1.18823e-13
SP140L	0.511974	1.25372	1.29208	1.9765e-58	1.97615e-56			LRRIQ1	0.0394831	0.260611	2.72259	7.16322e-05	0.000134448
C11orf21	0.0721056	0.178684	1.30922	1.55961e-15	9.95507e-15			CHST6	1.6341	3.72322	1.18805	2.54124e-17	2.06224e-16
IL10RA	1.33454	4.46509	1.74235	2.36432e-68	6.51513e-66			OCIAD2	1.9631	5.35554	1.4479	6.59429e-08	1.81494e-07
FTL	923.776	2129.31	1.20477	1.16493e-59	1.28403e-57			AL021395.1	1.03179	0.494684	-1.06057	2.54735e-10	9.35859e-10
AC069120.1	0.30422	0.113343	-1.42441	5.22476e-19	4.52184e-18			NLRC5	1.12861	2.38878	1.08173	3.65854e-31	1.17381e-29
CEBPD	7.78011	18.354	1.23823	1.14165e-28	2.23348e-27			LINC01150	0.572169	1.68938	1.56198	1.42917e-49	2.28307e-47
HLA-DPA3	0.121077	0.276812	1.19299	1.58267e-06	3.92988e-06			LINC00880	0.0568934	0.264554	2.21723	6.13588e-19	6.01289e-18
SH2D5	2.85701	0.776895	-1.87872	3.88068e-16	2.61365e-15			EFEMP2	3.4934	7.39209	1.08135	3.62338e-10	1.30412e-09
SYT7	11.1818	4.03615	-1.4701	1.99985e-17	1.51538e-16			C4A	2.05894	5.02896	1.28836	4.40515e-27	9.77003e-26
LINC02458	0.220918	0.0985228	-1.16498	4.35755e-13	2.17811e-12			KLHDC7B	0.0716727	0.299093	2.0611	5.03599e-40	3.22247e-38
LY86-AS1	0.487614	0.108813	-2.16389	3.53502e-11	1.4686e-10			EGR2	4.00341	9.80801	1.29273	3.58653e-15	2.27522e-14
GIMAP4	5.72206	13.7731	1.26725	5.80571e-65	1.08418e-62			LINC01331	0.178016	0.081111	-1.13403	0.00081946	0.00133465
HRH3	6.18584	2.03579	-1.60338	2.131e-32	5.712e-31			SIGLEC14	1.16848	3.32058	1.5068	5.47278e-33	2.05625e-31
OLFML2B	2.7935	7.30708	1.38722	2.77802e-33	7.9358e-32			POSTN	0.88304	9.9164	3.48927	1.85868e-06	4.26646e-06
VSTM2L	16.493	7.14791	-1.20626	2.31463e-15	1.45403e-14			TMEM220-AS1	0.23009	0.634831	1.46417	3.31206e-15	2.10989e-14
PCED1B-AS1	0.893127	3.10106	1.79583	3.25546e-74	2.27595e-71			C1S	4.91022	18.5343	1.91634	2.1936e-35	9.98221e-34
AC079061.1	0.295721	0.146041	-1.01787	6.86628e-17	4.96005e-16			MIA	0.103795	0.241944	1.22094	1.23636e-05	2.55868e-05
PLAC8	0.135444	0.645016	2.25164	2.04832e-31	5.03085e-30			HLA-DPB2	0.145074	0.68133	2.23157	2.65422e-20	2.9606e-19
ARL11	0.247378	0.82318	1.73449	4.7327e-74	2.97055e-71			C10orf105	0.385272	1.15065	1.57851	3.9164e-12	1.76462e-11
TNFAIP8L2	2.60442	8.04556	1.62723	3.4569e-73	1.90517e-70			CAVIN1	11.3447	28.2525	1.31636	1.07165e-29	2.98182e-28
AL031658.2	0.95555	0.382431	-1.32113	5.01747e-25	7.27694e-24			PIRT	1.29332	4.77392	1.88409	4.7531e-23	7.0644e-22
ITPKA	7.40338	2.81463	-1.39524	5.81698e-22	6.49088e-21			C5AR1	1.52522	5.62482	1.88279	4.00959e-46	4.38254e-44
RYR2	1.38696	0.379647	-1.8692	1.99832e-12	9.40513e-12			CHRNB2	7.35035	3.56234	-1.04499	1.32552e-26	2.78824e-25
CD2	0.175429	0.883816	2.33286	2.64307e-25	3.92655e-24			SIGLEC22P	0.0722492	0.20447	1.50083	1.05116e-32	3.86678e-31
PAK6	0.208572	0.0754895	-1.4662	1.08873e-12	5.23983e-12			CNTNAP5	1.3728	0.676737	-1.02045	1.17531e-14	7.05247e-14
KCNAB2	13.0934	5.54847	-1.23868	8.92882e-08	2.56915e-07			AL353803.1	0.151371	0.070049	-1.11165	4.20643e-08	1.18734e-07
S100Z	0.0934395	0.216062	1.20934	2.9725e-42	1.4763e-40			CD5	0.103205	0.276265	1.42054	6.52566e-18	5.69195e-17
TRPM8	0.102645	0.608465	2.5675	9.03488e-06	2.05571e-05			NOG	12.4385	6.01908	-1.0472	6.85206e-23	1.00403e-21
SLC6A15	1.50668	0.55897	-1.43053	6.98896e-11	2.80602e-10			TXLNB	0.374054	1.05585	1.49709	3.44674e-09	1.10307e-08
VAMP8	7.51899	23.312	1.63246	2.48786e-78	9.3693e-75			PPIAP39	0.408487	0.993273	1.2819	2.54291e-20	2.84478e-19
PLEK2	0.167749	0.397452	1.24448	3.67184e-12	1.68193e-11			LRRN4CL	0.764691	2.60864	1.77035	2.07675e-22	2.89453e-21
GRIN2B	1.52087	0.465671	-1.70751	5.7892e-19	4.98904e-18			AP000866.5	0.176479	0.0736658	-1.26043	8.70933e-08	2.35674e-07
MYO7A	0.791802	1.66878	1.07558	2.01284e-42	1.01296e-40			AP002840.2	0.197069	0.462801	1.23169	6.25378e-11	2.45762e-10
HCLS1	4.64553	16.3419	1.81466	5.11208e-76	6.07961e-73			LINC02407	0.0831648	0.213973	1.36338	6.60541e-15	4.07559e-14
CD300C	0.569216	1.95866	1.78282	3.4569e-73	1.90517e-70			HPD	0.160137	1.16813	2.86682	1.4563e-32	5.25555e-31
CHRM3	1.37009	0.494743	-1.46952	6.7543e-11	2.71615e-10			RFPL1S	3.46236	1.52998	-1.17824	1.02265e-13	5.52017e-13
SERPINA5	0.230219	1.98258	3.1063	4.68031e-16	3.12703e-15			AL445193.2	0.103845	0.235206	1.17949	2.40183e-10	8.84673e-10
AC093787.1	0.424279	0.201362	-1.07522	3.3415e-07	9.02731e-07			PROS1	4.67836	9.63524	1.04232	1.30208e-18	1.23782e-17
HLA-F	3.62249	7.63663	1.07596	7.83559e-29	1.55719e-27			LNCTAM34A	0.185912	0.576953	1.63384	2.83865e-23	4.30299e-22
AL606489.1	0.674672	0.327843	-1.04118	8.09231e-14	4.36093e-13			SLC17A9	0.289736	0.584571	1.01264	1.8755e-20	2.1422e-19
SIRPB1	0.109056	0.314605	1.52847	1.92299e-17	1.46008e-16			ASB5	0.122688	0.286657	1.22433	0.00939664	0.0131534
PYDC1	0.467166	0.129384	-1.85228	2.44437e-17	1.83865e-16			PTPN5	6.10848	2.87137	-1.08907	1.86433e-12	8.69871e-12
GMNC	0.0379135	0.302878	2.99795	0.0098065	0.014518			AC055874.1	0.128035	0.658147	2.36188	9.42997e-09	2.86788e-08
HLA-DPA1	8.28722	39.7912	2.26349	3.34294e-47	2.06385e-45			CD86	1.86705	5.63785	1.59439	1.31393e-54	5.3599e-52
RNU4-62P	0.329684	0.909546	1.46406	6.90116e-18	5.42206e-17			CYP2D6	1.28875	0.622541	-1.04973	4.92999e-24	8.07895e-23
AC073439.1	0.0730059	0.262539	1.84645	0.00305718	0.00489246			TMEM119	5.8011	15.1099	1.3811	5.15266e-39	3.13886e-37
KRT75	0.0263412	0.199187	2.91873	0.0338671	0.0457829			IGHG4	0.250875	1.75483	2.80629	0.00115038	0.00183541
NKX2-5	0.214788	0.44624	1.05491	3.47633e-09	1.17276e-08			AL356215.1	0.237078	0.52064	1.13492	1.3745e-21	1.76022e-20
DIRAS3	2.20269	5.93504	1.42999	4.48866e-16	3.00254e-15			GNG13	1.21416	0.502915	-1.27157	1.73735e-16	1.28156e-15
AL034399.2	0.230039	0.0668616	-1.78263	1.89143e-11	8.0868e-11			CXCL13	0.612714	0.257307	-1.25173	0.000965115	0.00155623
COL4A1	8.33039	17.4918	1.07023	2.87664e-10	1.08533e-09			AEBP1	16.6756	52.248	1.64764	1.0302e-14	6.22258e-14
RAB42	0.445157	1.15057	1.36996	4.82143e-25	7.01062e-24			TNFRSF8	0.255346	0.555277	1.12075	2.01176e-18	1.87197e-17
SNCB	57.0268	17.5273	-1.70204	9.12286e-28	1.64649e-26			SLC16A4	2.43397	5.64683	1.21413	1.90314e-31	6.28257e-30
GABRB3	8.76397	3.62513	-1.27355	1.16565e-37	4.54121e-36			KCNJ5	0.940062	1.99513	1.08565	7.19533e-32	2.45695e-30
DMRT3	0.18252	0.0633465	-1.52672	9.78028e-11	3.86897e-10			CCL2	4.38225	21.1931	2.27385	9.57278e-39	5.65066e-37
NGB	2.64538	0.486993	-2.4415	2.22623e-17	1.68072e-16			AC020907.2	0.435365	0.191972	-1.18133	3.48592e-11	1.41468e-10
MIR7848	0.0900739	0.247714	1.45949	6.79497e-12	3.03557e-11			SOCS3	3.38868	14.3538	2.08264	6.29408e-23	9.25834e-22
AL513217.1	2.46186	1.05543	-1.22192	3.52924e-22	4.00133e-21			AC106786.2	0.0690678	0.139961	1.01894	1.7923e-07	4.67764e-07
CP	1.06095	5.91109	2.47807	6.50779e-33	1.81096e-31			AC104137.1	0.205361	0.440575	1.10123	0.00109466	0.00175152
LINC02051	0.888712	0.41811	-1.08783	8.28542e-10	2.98022e-09			ADGRG5	0.112552	0.303447	1.43085	4.04472e-26	8.14794e-25
EEF1A2	106.232	46.1552	-1.20265	1.23348e-19	1.1234e-18			TGFBI	3.7212	7.99996	1.10422	1.38989e-15	9.21648e-15
UBD	0.262705	0.948967	1.85291	8.91484e-22	9.77863e-21			EIF4E1B	0.390349	0.14597	-1.4191	2.50573e-17	2.03487e-16
SCIN	0.758154	4.41656	2.54236	2.38781e-63	3.77308e-61			AC244502.3	0.264576	0.0962288	-1.45914	0.000839658	0.0013655
AL161621.1	0.286546	0.0857786	-1.74008	2.03222e-10	7.76726e-10			SUSD2	0.545288	1.12535	1.04528	2.81978e-14	1.62623e-13
TNC	15.9944	38.6044	1.2712	1.429e-24	1.9895e-23			LIF	0.298947	1.70929	2.51544	2.3316e-16	1.69197e-15
HLA-DQB1	2.60223	12.9651	2.31681	2.47292e-36	8.94048e-35			AC113349.1	0.0586688	0.369443	2.65469	2.99411e-12	1.36686e-11
CCR7	0.086877	0.215722	1.31212	1.36891e-08	4.30691e-08			AC243960.3	0.348495	0.889381	1.35166	1.34743e-24	2.32835e-23
RORB-AS1	0.479709	0.232439	-1.04531	1.41322e-14	8.19007e-14			AL158071.3	0.235521	0.493554	1.06735	5.33561e-17	4.15996e-16
SYT13	10.1663	2.76835	-1.8767	9.83327e-26	1.51564e-24			GMPR	5.64932	13.2419	1.22896	4.26288e-16	3.0121e-15
AC006450.3	0.499747	0.203527	-1.29598	2.81323e-21	2.95664e-20			COL1A1	1.75143	14.3776	3.03721	5.3022e-27	1.16577e-25
CRYBG1	0.271437	0.664429	1.2915	2.33592e-15	1.46618e-14			NRGN	186.862	78.061	-1.2593	1.55538e-06	3.60538e-06
KCNH5	0.529339	0.111879	-2.24225	4.09144e-15	2.50271e-14			CIDEA	0.335667	0.128851	-1.38133	2.44945e-09	7.99132e-09
KLHL6	0.334293	1.00088	1.58209	5.43626e-53	4.2652e-51			MIR7158	2.84487	1.40069	-1.02222	5.30776e-13	2.63645e-12
AC010247.2	0.0970778	0.2606	1.42463	1.75492e-47	1.1016e-45			TMEM176A	4.17355	9.82508	1.23519	1.92489e-26	3.97579e-25
THBS1	1.17791	3.24889	1.46372	0.0333428	0.0451255			AC023043.1	0.122948	0.262013	1.09158	1.87436e-15	1.22559e-14
INSC	0.176272	0.0866297	-1.02487	9.86997e-08	2.82342e-07			LINC00599	5.57166	2.06819	-1.42974	4.67379e-32	1.60554e-30
SLAMF7	0.0740153	0.222793	1.58981	4.49505e-13	2.24167e-12			AC243962.1	0.461451	0.99218	1.10442	7.01863e-22	9.32715e-21
LINC02151	0.603966	0.182631	-1.72554	2.35543e-14	1.33794e-13			AL353597.1	0.824861	0.278824	-1.5648	1.15958e-22	1.66391e-21
FCAR	0.103106	0.358525	1.79795	1.619e-23	2.06567e-22			TMEM173	2.70571	5.77743	1.09442	2.6706e-49	4.09444e-47
IRF1	1.44134	3.22731	1.16292	3.22391e-31	7.77454e-30			GLS2	0.256396	0.123106	-1.05847	4.64094e-13	2.32189e-12
CDHR5	0.232862	0.11155	-1.06179	1.19057e-07	3.36782e-07			STX11	0.467371	1.23203	1.3984	2.15203e-38	1.21385e-36
CCL1	0.226666	0.0683611	-1.72932	6.10332e-06	1.41636e-05			AL355922.4	0.252657	0.104755	-1.27016	4.7499e-13	2.37018e-12
LINC02285	0.160699	0.551097	1.77795	3.07195e-66	6.7392e-64			CD37	2.91368	7.49296	1.3627	2.46554e-42	1.90925e-40
CKMT1B	1.94716	0.758882	-1.35942	7.44159e-32	1.89145e-30			LCTL	0.250242	0.615521	1.29849	3.77639e-07	9.48728e-07
AL512380.1	0.304852	0.0791419	-1.94559	4.3156e-11	1.77494e-10			ECM2	1.89915	7.19321	1.92128	1.68663e-44	1.57263e-42
ANG	0.529414	1.57823	1.57584	1.48077e-43	7.87281e-42			S100A3	0.900861	3.49799	1.95715	2.91116e-32	1.01998e-30
MX1	3.41988	9.35533	1.45184	2.08954e-13	1.07846e-12			AC004921.1	0.132718	0.383126	1.52946	6.51236e-30	1.84806e-28
MIR486-1	0.430295	0.164816	-1.38447	3.74941e-14	2.09241e-13			SLAMF8	0.509059	1.82475	1.8418	2.43664e-31	7.9518e-30
STAT4	1.0038	0.272209	-1.88268	1.48849e-07	4.16004e-07			C7orf57	0.164692	2.10444	3.67559	1.57401e-15	1.03684e-14
HFE	0.448001	0.897838	1.00295	1.78605e-24	2.47137e-23			NCF4	2.33503	5.89157	1.33521	8.33897e-46	8.81923e-44
AC138207.6	0.243843	0.569107	1.22275	3.07025e-45	1.7608e-43			KCNV1	1.19105	0.515134	-1.20922	6.53195e-07	1.59062e-06
AL034397.3	0.669998	1.49937	1.16213	1.26409e-28	2.46448e-27			AHR	1.78754	3.79086	1.08455	4.50732e-22	6.08182e-21
THEMIS2	2.43214	6.66007	1.45331	1.30008e-55	1.16113e-53			L3MBTL4-AS1	0.17833	0.451341	1.33967	1.95857e-42	1.53225e-40
BICDL1	1.75731	0.586166	-1.58399	1.0062e-33	2.98373e-32			CACNG3	5.48487	2.49468	-1.1366	1.62546e-09	5.40337e-09
AC098613.1	0.375427	1.44908	1.94853	1.90008e-57	1.82699e-55			IGHA2	0.163779	1.4741	3.17001	1.1708e-09	3.96116e-09
SPAG1	1.26911	2.58966	1.02894	5.00059e-26	7.8906e-25			MYL9	6.41198	13.7555	1.10116	3.30696e-16	2.36297e-15
NECAB1	7.56201	3.20979	-1.23629	2.85457e-07	7.7657e-07			KIF26A	4.27382	2.0907	-1.03154	1.11812e-18	1.07231e-17
HK2	3.21738	7.05926	1.13363	2.74432e-40	1.23774e-38			AOX1	0.152922	0.362028	1.24331	1.23067e-06	2.89262e-06
SCARA5	0.693249	0.294379	-1.2357	2.62725e-18	2.14315e-17			IGSF6	2.04342	5.1479	1.333	1.62824e-43	1.39833e-41
RASGRF2	3.30522	1.47572	-1.16332	2.77739e-08	8.43407e-08			GSAP	0.724834	1.50557	1.05459	6.03134e-19	5.91331e-18
PARVG	0.800928	2.68118	1.74312	3.35974e-72	1.65036e-69			SDC4	16.313	40.5026	1.31199	1.02299e-16	7.72023e-16
STXBP2	0.80356	2.12968	1.40616	1.72015e-64	2.96706e-62			TMEM37	0.914346	1.94869	1.09169	4.80741e-28	1.16706e-26
CEP170B	9.49245	4.7277	-1.00564	2.37409e-25	3.54091e-24			HLA-DRB5	13.2062	68.2009	2.36858	4.46479e-49	6.58024e-47
CARMIL2	1.51328	0.519247	-1.54319	1.8691e-25	2.80812e-24			FAM163A	0.335248	0.151863	-1.14246	1.55969e-09	5.19608e-09
MYBPH	0.143439	0.804811	2.48821	5.15388e-26	8.12114e-25			LINC02104	0.0684234	0.160944	1.23399	6.17051e-09	1.91573e-08
PTPN3	0.622554	0.278589	-1.16006	2.29573e-06	5.59534e-06			MIR3151	1.66543	3.78422	1.1841	8.73331e-14	4.75122e-13
AL445623.1	0.163229	0.368157	1.17343	0.000102877	0.000203502			CFAP99	0.073049	0.226094	1.62999	6.72521e-14	3.71629e-13
CMTM7	0.900109	2.40558	1.41822	1.43639e-71	6.12391e-69			CD302	0.850312	2.10109	1.30508	5.67843e-39	3.4408e-37
MSX2P1	0.210382	0.0646148	-1.70308	9.07459e-24	1.17912e-22			AC007375.2	0.556061	0.273069	-1.02598	5.47612e-29	1.43131e-27
PROKR2	0.263881	0.0872931	-1.59595	5.50447e-11	2.23985e-10			KRT8	0.126349	0.370671	1.55273	8.15149e-07	1.95931e-06
CRH	0.765763	0.327964	-1.22336	2.12653e-19	1.89775e-18			IGFBP2	6.03449	22.2971	1.88555	3.51898e-10	1.26834e-09
MUC6	0.174152	0.0626234	-1.47557	4.65548e-12	2.11236e-11			HSPG2	1.28812	3.03091	1.23448	1.90377e-14	1.12029e-13
STX1B	23.6821	10.4416	-1.18145	3.9353e-34	1.20165e-32			HSPA6	2.02723	4.58259	1.17666	1.17261e-26	2.48489e-25
PITPNM3	3.83718	1.59068	-1.2704	6.23419e-09	2.04275e-08			HTR3B	0.251991	0.0933584	-1.43252	0.00153388	0.00240857
AP001257.1	0.0556167	0.151806	1.44864	1.53677e-20	1.52637e-19			DAPP1	0.150268	0.553852	1.88196	1.47485e-54	5.9108e-52
GPR179	0.769626	0.327471	-1.23279	9.7046e-24	1.25881e-22			SYNM	9.87403	19.9652	1.01577	3.72629e-29	9.88656e-28
DYNC1I1	9.52529	4.26557	-1.15902	1.227e-15	7.91249e-15			GADD45A	12.2571	25.4816	1.05583	1.65205e-18	1.55562e-17
PRDM12	0.184571	0.0782934	-1.23722	4.27152e-18	3.41419e-17			AL591848.2	0.233925	0.104817	-1.15818	2.57393e-10	9.45168e-10
RNASET2	4.29261	11.2042	1.38411	7.17994e-63	1.07442e-60			COL1A2	5.47913	11.5379	1.07437	1.35964e-21	1.74296e-20
FTLP2	0.370175	0.840902	1.18373	2.19766e-29	4.56418e-28			CALB1	2.05538	1.01713	-1.01491	4.10873e-09	1.30306e-08
EVA1C	1.67507	3.43414	1.03573	8.87285e-20	8.23033e-19			AL591885.1	0.630742	0.262994	-1.26202	5.72831e-31	1.80742e-29
ACSL6	8.57663	4.15696	-1.04488	1.31019e-29	2.7514e-28			RGS4	14.2729	6.73108	-1.08437	0.000367899	0.00062728
FCGR1A	1.73052	6.4409	1.89606	2.16134e-68	6.10472e-66			AC027559.1	0.252418	0.506944	1.00601	1.006e-09	3.43255e-09
GRIN3A	3.1182	0.871908	-1.83847	1.28691e-27	2.29511e-26			FEZF1	0.118741	0.314286	1.40426	0.000321385	0.000552507
GIMAP2	1.93399	4.21835	1.1251	6.32883e-47	3.88604e-45			AL008726.1	0.104394	0.276729	1.40643	9.85676e-08	2.65028e-07
AC027807.2	0.0851342	0.191699	1.17103	9.84611e-09	3.15623e-08			DMRTA2	0.396676	1.64714	2.05393	4.27072e-05	8.23567e-05
VIPR1	1.05559	0.502745	-1.07015	5.71358e-11	2.31743e-10			SDR16C5	0.406364	0.192878	-1.07508	4.9793e-06	1.08703e-05
AL021395.1	1.16398	0.361989	-1.68505	5.02149e-16	3.34805e-15			GCH1	0.556057	1.1508	1.04933	7.05796e-31	2.19363e-29
NLRC5	1.1174	2.40003	1.10291	2.30548e-35	7.72918e-34			C7orf77	0.0687691	0.163118	1.24608	2.70289e-15	1.73489e-14
LINC01150	0.517514	1.74424	1.75293	5.21131e-63	7.9564e-61			RNU6-1028P	1.64426	0.713119	-1.20522	2.42214e-16	1.7521e-15
LINC00880	0.0557649	0.265686	2.25229	2.05182e-22	2.38984e-21			CRYM	7.41789	3.39435	-1.12787	7.87232e-08	2.14294e-07
C4A	1.91776	5.17068	1.43093	5.06812e-32	1.31783e-30			NCMAP	0.0893855	0.27858	1.63998	3.43427e-20	3.801e-19
KLHDC7B	0.0695669	0.301206	2.11428	6.31958e-42	3.07753e-40			CH25H	5.26914	14.9519	1.50469	2.32059e-16	1.68505e-15
EGR2	4.23907	9.57146	1.17499	7.92809e-14	4.27958e-13			TLR10	0.386041	1.07069	1.47172	1.94927e-30	5.8208e-29
LINC01331	0.216117	0.0428654	-2.33393	6.57292e-11	2.64744e-10			RRM2P3	0.064457	0.141536	1.13476	0.00151867	0.00238634
SIGLEC14	1.01268	3.47698	1.77966	5.62585e-45	3.19401e-43			AC243562.2	2.77129	1.35445	-1.03285	1.84434e-26	3.81631e-25
GRP	3.72124	0.449461	-3.04951	6.86988e-06	1.58384e-05			AC005842.1	0.288004	0.0982225	-1.55196	3.96242e-09	1.25929e-08
KCNC1	4.13002	1.6809	-1.29691	1.21813e-37	4.7375e-36			AC012625.1	0.132513	0.303073	1.19353	1.05698e-07	2.831e-07
C1S	5.58814	17.8538	1.67579	4.34487e-21	4.50973e-20			ITGBL1	0.0650637	0.238947	1.87677	4.58172e-18	4.06942e-17
HLA-DPB2	0.163908	0.662425	2.01487	1.63822e-13	8.55887e-13			MORN5	1.3832	3.33888	1.27135	1.1215e-11	4.80938e-11
AC009119.1	0.189296	0.447262	1.24047	9.35142e-43	4.79149e-41			ALOX12B	0.436017	0.148201	-1.55683	7.45719e-23	1.0899e-21
C10orf105	0.379093	1.15686	1.60959	4.4159e-09	1.47193e-08			RIPK3	0.3065	0.723116	1.23834	1.66734e-43	1.42654e-41
PIRT	1.66683	4.39899	1.40006	5.65287e-14	3.09504e-13			LOXL1-AS1	0.0769507	0.215034	1.48256	6.9728e-09	2.15136e-08
C5AR1	1.38816	5.76241	2.0535	6.12668e-60	6.88748e-58			AL161785.1	1.12498	2.67988	1.25226	1.12766e-38	6.60522e-37
CHRNB2	7.82109	3.08981	-1.33985	1.17915e-38	4.91589e-37			LINC02574	0.129524	0.350645	1.4368	2.064e-06	4.70934e-06
SIGLEC22P	0.0665766	0.210164	1.65843	1.97747e-39	8.55995e-38			LOXL1	0.559835	1.38458	1.30637	1.03512e-09	3.52562e-09
CNTNAP5	1.46369	0.5855	-1.32187	8.61515e-23	1.03437e-21			SH3TC1	1.31491	2.86585	1.124	7.51856e-35	3.27775e-33
AL353803.1	0.152799	0.068615	-1.15504	2.23147e-07	6.13484e-07			C9orf64	1.89498	3.82054	1.01159	3.46641e-16	2.47536e-15
CD5	0.112335	0.2671	1.24957	2.91925e-09	9.91334e-09			AC099524.1	0.120132	0.307229	1.3547	4.68379e-34	1.90385e-32
GFOD1-AS1	0.26615	0.125928	-1.07963	1.37449e-18	1.14689e-17			MOXD1	1.93454	5.56265	1.52378	0.000232841	0.000407682
AL023653.1	0.166672	0.343509	1.04333	3.87276e-23	4.7819e-22			CLVS2	3.01666	1.42157	-1.08546	6.21882e-13	3.065e-12
TXLNB	0.451521	0.978094	1.11518	0.00897006	0.0133708			SLA	2.01548	5.18104	1.36212	2.78636e-40	1.82907e-38
PPIAP39	0.352022	1.04995	1.57659	9.52525e-27	1.5955e-25			AC000067.1	0.074904	0.157102	1.06859	9.19417e-05	0.000170342
SLC32A1	4.92452	1.86895	-1.39776	1.05819e-14	6.21709e-14			TGFB2	2.35184	9.09455	1.95121	1.60247e-26	3.34004e-25
LRRN4CL	0.78289	2.59038	1.72628	1.52563e-21	1.63379e-20			OLR1	4.88288	16.3748	1.74568	6.26738e-43	5.15007e-41
AP000866.5	0.18862	0.061479	-1.61732	4.43156e-13	2.21245e-12			C1QC	64.6439	202.14	1.64477	2.15136e-51	4.8182e-49
AP002840.2	0.217877	0.441915	1.02026	5.20567e-07	1.37271e-06			AC016205.1	0.107047	0.242959	1.18248	4.9037e-11	1.9506e-10
KCNJ6	0.503627	0.203298	-1.30876	1.95502e-14	1.11893e-13			AP005271.1	0.240333	0.500574	1.05855	0.000875706	0.00142018
LINC02407	0.0889227	0.208193	1.2273	6.41348e-08	1.87525e-07			IGHG1	1.5406	7.39242	2.26255	1.70381e-12	7.97484e-12
S100A2	0.771344	1.62733	1.07706	6.39041e-31	1.49635e-29			RAMP3	5.60443	12.3237	1.13679	4.4915e-11	1.79943e-10
ASIP	0.593113	1.24743	1.07258	2.5116e-22	2.89257e-21			UNC13C	1.11644	0.541416	-1.0441	3.28935e-07	8.31951e-07
RFPL1S	3.96472	1.02572	-1.95059	4.58636e-31	1.08973e-29			IL18	1.96575	5.81684	1.56516	2.05412e-48	2.79312e-46
AL445193.2	0.0875215	0.251591	1.52337	8.38378e-17	5.99683e-16			AC104051.2	20.6368	8.56494	-1.26871	8.54873e-05	0.000158775
AC018685.2	0.188968	0.0904614	-1.06276	4.35272e-14	2.413e-13			MMP14	9.33759	22.3307	1.25791	1.11369e-30	3.39669e-29
LNCTAM34A	0.228571	0.534133	1.22456	3.80026e-14	2.11875e-13			SNHG18	0.668305	1.41651	1.08376	0.0100218	0.013963
SLC17A9	0.259881	0.61454	1.24166	7.9357e-33	2.19749e-31			FCGR2B	0.0619589	0.405457	2.71017	8.6217e-36	4.07773e-34
PTPN5	6.84738	2.12967	-1.68492	1.71542e-23	2.18007e-22			AL355922.1	0.179105	0.917938	2.35759	7.43365e-33	2.76121e-31
LINC02568	0.236019	0.100207	-1.23592	5.87801e-17	4.26387e-16			RBMS1P1	0.0943111	0.203158	1.1071	2.24237e-21	2.80376e-20
CD86	1.58403	5.92194	1.90247	1.20539e-79	6.80924e-76			APLNR	24.3446	67.8586	1.47893	1.39746e-21	1.78743e-20
ACSM5	2.29479	4.96278	1.11279	7.31863e-26	1.14128e-24			TLR5	0.688857	1.68851	1.29347	5.19336e-41	3.55201e-39
CLK3P2	0.154359	0.0702791	-1.13512	1.31556e-10	5.13233e-10			SKOR2	0.357006	0.133929	-1.41449	0.00135543	0.0021434
LINC02320	0.147976	0.0719386	-1.04053	3.4956e-12	1.60574e-11			BMX	0.0764437	0.19103	1.32133	6.64508e-06	1.42736e-05
TMEM119	4.88957	16.0249	1.71254	1.6141e-58	1.6429e-56			HTR6	0.322728	0.134872	-1.25873	1.08282e-17	9.16149e-17
IGHG4	0.192461	1.81347	3.23611	3.85004e-06	9.13242e-06			CA3	0.812384	3.8374	2.2399	2.35378e-16	1.70536e-15
ATOH7	0.64479	0.278899	-1.20909	3.76035e-19	3.29848e-18			IGLC3	0.42778	2.75443	2.68682	1.24892e-13	6.66439e-13
AL356215.1	0.227622	0.530132	1.21971	7.09805e-28	1.2874e-26			PIFO	1.6231	5.83819	1.84677	1.83631e-35	8.38974e-34
GNG13	1.35764	0.358891	-1.91948	7.62907e-23	9.18968e-22			SHROOM3	0.467997	1.00946	1.10901	0.00119008	0.00189543
AEBP1	19.282	49.6317	1.364	5.86275e-08	1.72023e-07			SNHG26	0.0684879	0.158209	1.20791	1.11556e-21	1.44385e-20
TNFRSF8	0.214405	0.596372	1.47587	4.86835e-28	9.03162e-27			LOXL4	0.153662	0.508092	1.72533	7.11833e-20	7.65229e-19
KCNJ5	0.846125	2.08942	1.30416	1.10396e-41	5.33017e-40			MTATP8P2	6.16256	2.55865	-1.26815	7.1897e-06	1.53626e-05
TMPRSS9	0.576787	0.245488	-1.23239	4.23972e-05	8.83771e-05			HMGA1P4	0.140384	0.287124	1.03229	1.95253e-13	1.01742e-12
SIGLEC5	0.100398	0.210782	1.07002	3.1222e-22	3.5595e-21			TMEM52B	0.4218	1.13017	1.42191	2.04781e-41	1.46646e-39
CCL2	4.61893	20.9555	2.1817	6.01888e-34	1.80854e-32			SCRT1	11.6171	4.06982	-1.51321	1.41265e-33	5.50694e-32
AC020907.2	0.475719	0.151465	-1.65112	3.56644e-16	2.41063e-15			RYR3	0.646502	1.45482	1.17011	1.20148e-05	2.49017e-05
SOCS3	4.16044	13.5791	1.70658	3.2598e-13	1.64821e-12			NFAM1	0.929503	2.41742	1.37894	5.66369e-47	6.60109e-45
CNGB1	0.283621	0.0468019	-2.59932	2.89792e-12	1.34156e-11			FOSL1	0.78039	2.21433	1.5046	3.47422e-20	3.84149e-19
ADGRG5	0.11964	0.296333	1.30852	6.34086e-27	1.07566e-25			INA	40.343	15.8837	-1.34477	5.17286e-27	1.13843e-25
EIF4E1B	0.434886	0.101264	-2.10251	3.9624e-27	6.80353e-26			FABP4	0.540883	1.73711	1.6833	1.0241e-05	2.14216e-05
AC244502.3	0.270465	0.0903182	-1.58235	1.46297e-07	4.09377e-07			GNG12	6.43328	16.2862	1.34002	2.75609e-34	1.14473e-32
LIF	0.344739	1.66333	2.2705	7.04404e-09	2.29513e-08			Z68323.1	0.253234	0.10289	-1.29937	3.66175e-08	1.03989e-07
AC113349.1	0.0621115	0.365987	2.55886	8.26685e-12	3.6584e-11			P3H2	0.701141	2.40863	1.78044	7.42915e-47	8.57129e-45
AC243960.3	0.323961	0.914008	1.49639	4.46609e-31	1.06451e-29			MIR6071	5.20921	2.31798	-1.1682	2.22528e-16	1.62099e-15
AL158071.3	0.20298	0.526219	1.37433	2.45583e-28	4.67497e-27			AC008759.3	0.992047	2.29219	1.20825	1.7214e-13	9.0337e-13
CHRM2	0.205421	0.0854298	-1.26578	2.25168e-15	1.41684e-14			LCN2	0.087041	0.177823	1.03068	0.0249152	0.0327217
AC134312.1	0.565225	0.168721	-1.74419	1.80399e-14	1.0367e-13			AL390778.2	0.137711	0.064586	-1.09235	2.15919e-05	4.33545e-05
AC004147.2	0.211923	0.0849595	-1.31869	1.98433e-21	2.10704e-20			MMP1	0.0729956	0.148265	1.0223	0.000249398	0.000434705
COL1A1	4.21873	11.9009	1.49619	1.69589e-13	8.84585e-13			TBXAS1	2.2509	5.5445	1.30055	2.89271e-48	3.86439e-46
NRGN	212.177	52.6503	-2.01075	9.0392e-13	4.37741e-12			LINC01202	0.453405	0.225789	-1.00582	3.34756e-06	7.4541e-06
CIDEA	0.374618	0.0897531	-2.06138	7.63395e-14	4.12474e-13			AP000843.1	1.2354	0.542365	-1.18764	7.31088e-13	3.56935e-12
MIR7158	2.96075	1.28437	-1.2049	2.02222e-16	1.39567e-15			AC016717.2	0.851458	0.358289	-1.24881	5.19107e-20	5.63615e-19
LINC00599	5.35618	2.28449	-1.22933	2.70724e-25	4.0166e-24			COL5A2	2.34146	5.89765	1.33273	2.31531e-07	5.97434e-07
NRSN1	14.9977	6.77216	-1.14705	3.4262e-30	7.50179e-29			LRRC25	1.10259	3.40862	1.62829	1.28766e-51	2.94152e-49
AC243962.1	0.389065	1.06484	1.45255	1.9726e-39	8.55524e-38			TMEM132D	1.78064	0.75397	-1.23982	2.96437e-11	1.2125e-10
AL353597.1	0.800905	0.302872	-1.40292	5.33379e-15	3.22339e-14			PPIAP48	0.199967	0.586923	1.55341	5.41627e-20	5.86951e-19
KCNH3	7.59056	2.66928	-1.50775	8.35001e-11	3.32998e-10			HP	0.05512	0.593278	3.42806	7.42285e-12	3.24718e-11
GLS2	0.286948	0.092439	-1.63422	2.44604e-25	3.64342e-24			C16orf54	0.181477	0.545058	1.58663	2.75331e-50	4.9138e-48
STX11	0.457917	1.24152	1.43895	3.30092e-41	1.55391e-39			CD93	2.2283	5.79258	1.37826	1.23156e-26	2.60015e-25
CD37	2.36841	8.0403	1.76333	1.86235e-70	7.13249e-68			IGLV1-47	0.296922	1.9308	2.70104	2.11794e-09	6.95847e-09
NELL2	15.7104	6.71603	-1.22604	2.65126e-14	1.49783e-13			RDH10	2.33957	6.32277	1.43431	2.37409e-25	4.42723e-24
LCTL	0.287718	0.577903	1.00617	0.033532	0.0453679			FKBP9	5.80472	11.6125	1.00039	3.85804e-13	1.95071e-12
ECM2	2.22083	6.87031	1.62928	3.57025e-37	1.34905e-35			PTGER2	0.0414015	0.323621	2.96655	6.00729e-26	1.17997e-24
GPR12	1.30982	0.50906	-1.36347	2.61644e-14	1.47951e-13			SYT1	35.7818	16.4321	-1.12271	6.67848e-08	1.83656e-07
AC134312.3	0.762854	0.223697	-1.76986	1.39346e-13	7.32246e-13			IGFBP7-AS1	0.726067	2.56421	1.82034	2.54934e-09	8.29589e-09
S100A3	0.943367	3.45532	1.87293	4.39652e-36	1.5426e-34			LGR6	0.709761	3.36258	2.24417	0.00150883	0.00237179
AC004921.1	0.117131	0.398772	1.76744	8.45166e-39	3.54311e-37			CLEC7A	0.762127	2.50108	1.71445	2.77451e-48	3.72828e-46
SLAMF8	0.453447	1.88058	2.05217	5.18849e-38	2.07503e-36			NRIR	0.220225	0.466911	1.08417	0.000994094	0.00159957
C7orf57	0.304101	1.9645	2.69154	3.40498e-10	1.2734e-09			CD48	0.248313	0.958664	1.94887	5.83168e-35	2.57677e-33
NCF4	2.0099	6.21793	1.62931	6.74235e-72	3.17396e-69			SERPINH1	5.14088	11.3215	1.13897	1.0891e-23	1.73375e-22
KCNV1	1.40985	0.29551	-2.25426	1.10125e-15	7.14232e-15			CCL17	0.274275	0.662005	1.27122	0.0181608	0.0243751
L3MBTL4-AS1	0.15767	0.47208	1.58212	1.60212e-60	1.90534e-58			RPSAP69	0.434791	0.18074	-1.26641	3.54662e-08	1.00946e-07
DCLK3	0.211321	0.079691	-1.40695	2.36665e-08	7.2487e-08			DPEP1	0.450055	1.19487	1.40868	0.00505974	0.00737673
CACNG3	6.47469	1.50111	-2.10878	1.05683e-18	8.91712e-18			IBSP	0.103811	2.26147	4.44523	1.34379e-11	5.70376e-11
IGHA2	0.155989	1.48192	3.24795	3.91223e-07	1.04691e-06			GLIPR1	1.70929	3.72171	1.12257	8.46008e-34	3.35524e-32
IGSF6	1.81077	5.38143	1.57139	9.81616e-62	1.33618e-59			NLRP4	0.067217	0.192924	1.52114	1.97916e-10	7.36829e-10
SDC4	18.8694	37.9365	1.00754	9.53829e-12	4.19722e-11			AC097493.1	0.0582811	0.179372	1.62185	1.46426e-05	2.99968e-05
TMEM37	0.913282	1.94976	1.09416	1.13079e-28	2.21415e-27			PDZK1IP1	0.187069	0.453687	1.27812	1.52488e-07	4.01642e-07
HLA-DRB5	13.2176	68.1895	2.36709	2.47548e-44	1.37098e-42			KCNH7	0.626965	0.221218	-1.50292	1.61893e-17	1.34826e-16
FAM163A	0.403527	0.0833254	-2.27584	3.35311e-20	3.23514e-19			MYH11	0.621977	1.58405	1.34868	0.000348461	0.000595827
LCN15	0.204886	0.0845627	-1.27673	1.92303e-10	7.36863e-10			SEC61G	18.8828	60.8444	1.68805	0.00302353	0.00455814
CFAP99	0.0846622	0.214437	1.34076	1.16293e-10	4.5589e-10			WDFY4	0.538324	1.45193	1.43142	1.09025e-49	1.75392e-47
AC007375.2	0.56661	0.262479	-1.11015	1.12029e-33	3.30471e-32			GYPC	3.71235	8.27303	1.15608	1.03916e-36	5.21728e-35
ADGRE4P	0.234418	0.636926	1.44205	6.87965e-28	1.25264e-26			GNA15	1.37526	2.95448	1.1032	7.07529e-37	3.59173e-35
IGFBP2	9.08092	19.2392	1.08314	0.000717246	0.0012632			GPR157	0.102035	0.300519	1.55839	1.93648e-20	2.20743e-19
HSPA6	2.09555	4.51401	1.10708	3.47709e-25	5.10184e-24			SLC35D3	0.162276	0.0744903	-1.12333	4.39011e-16	3.09913e-15
HTR3B	0.299432	0.045738	-2.71076	1.05218e-10	4.14634e-10			CPA3	0.058223	0.300385	2.36715	4.55867e-07	1.13145e-06
DAPP1	0.13697	0.5672	2.05	7.50097e-68	1.94818e-65			CYTIP	0.393408	1.22711	1.64116	4.27366e-54	1.57464e-51
PAK5	3.33774	1.4477	-1.20511	1.28224e-33	3.75305e-32			SCGB1D2	0.470684	1.55651	1.72548	2.6978e-16	1.94167e-15
GADD45A	12.3098	25.4288	1.04666	1.27271e-19	1.15867e-18			AC245164.1	0.164403	0.0748861	-1.13446	8.69429e-05	0.000161408
SLCO2B1	10.1849	20.7784	1.02865	9.12365e-55	7.83871e-53			ETV7	0.245326	0.61958	1.33659	8.2364e-16	5.6232e-15
AL591848.2	0.246562	0.0921316	-1.42018	5.09943e-16	3.39701e-15			MADCAM1	1.33722	0.627183	-1.09228	5.01661e-23	7.43669e-22
KCNJ3	3.68617	1.51652	-1.28136	9.5761e-12	4.2114e-11			LINC01871	0.184098	0.399359	1.11721	1.78127e-10	6.66197e-10
PCDHA8	0.159421	0.0763299	-1.06252	4.75895e-13	2.36753e-12			AP001269.2	0.143119	0.293823	1.03774	0.00922541	0.0129307
AL591885.1	0.63338	0.260346	-1.28264	5.0052e-30	1.07917e-28			FYB1	2.18865	6.19378	1.50078	5.92109e-48	7.68531e-46
RGS4	16.7559	4.23863	-1.983	1.96464e-11	8.3776e-11			SVOP	7.81908	2.84375	-1.4592	2.8878e-23	4.3717e-22
CLDN7	0.187773	0.467175	1.31497	8.06278e-37	2.98667e-35			MIAT	8.35641	3.8624	-1.11339	2.62277e-20	2.92838e-19
LINC00390	0.377837	0.112717	-1.74506	5.10604e-09	1.69025e-08			LINC01907	0.0913752	0.216169	1.24228	4.48561e-28	1.09126e-26
STXBP6	3.92027	1.7754	-1.14281	1.07621e-25	1.65092e-24			MIR5695	1.02657	0.501462	-1.03362	1.74686e-14	1.03328e-13
AL008726.1	0.104585	0.276537	1.4028	2.89857e-09	9.84778e-09			DOCK2	0.916785	2.53312	1.46626	1.27658e-51	2.94152e-49
DMRTA2	0.672569	1.3702	1.02663	6.06151e-05	0.000123815			AC022893.2	0.30393	0.126824	-1.26091	1.12074e-16	8.42179e-16
SDR16C5	0.470377	0.128622	-1.87069	9.2029e-13	4.45573e-12			SAMD9	1.31027	2.72163	1.05461	1.97821e-20	2.25163e-19
RNU6-1028P	1.69923	0.657939	-1.36886	2.58525e-19	2.29353e-18			IGHM	0.76986	4.34295	2.49601	8.80729e-15	5.34971e-14
CRYM	8.48795	2.32024	-1.87114	5.17792e-15	3.13422e-14			COL21A1	0.237327	0.56697	1.2564	0.000559346	0.000931454
NCMAP	0.120051	0.247799	1.04553	6.83571e-21	7.0018e-20			DLEC1	0.433375	1.12675	1.37848	1.53531e-26	3.20297e-25
CH25H	5.19821	15.0231	1.5311	1.29954e-19	1.18167e-18			SERPINA1	1.34024	7.35849	2.45692	2.83269e-62	2.157e-58
TLR10	0.365462	1.09135	1.57832	2.89426e-38	1.18262e-36			PTCRA	0.152568	0.601639	1.97945	6.54794e-26	1.28066e-24
LBP	0.121816	0.268707	1.14134	4.71442e-06	1.10631e-05			FLNC	3.28056	11.5007	1.80971	1.80631e-23	2.78807e-22
AC073365.1	0.542037	0.222289	-1.28596	6.68049e-10	2.42494e-09			LINC02520	0.687717	0.34042	-1.0145	1.95047e-06	4.46401e-06
AC243562.2	2.75298	1.37283	-1.00384	7.65204e-25	1.09365e-23			IGKV3-15	0.0701428	0.771927	3.4601	6.23595e-08	1.7215e-07
AC005842.1	0.284921	0.101318	-1.49167	1.25401e-06	3.15857e-06			MT1M	7.62342	16.3647	1.10207	4.78147e-06	1.04574e-05
MORN5	1.34202	3.38023	1.33272	1.27274e-17	9.80189e-17			CYR61	12.6617	33.916	1.42149	9.8467e-18	8.362e-17
ALOX12B	0.436453	0.147763	-1.56254	2.28989e-25	3.41986e-24			AQP1	78.3168	217.329	1.47249	2.96404e-12	1.35394e-11
RIPK3	0.2704	0.759353	1.48968	2.04247e-67	5.12797e-65			RTP5	19.7389	7.59061	-1.37875	1.08492e-28	2.78783e-27
AL161785.1	0.902398	2.90331	1.68586	7.94606e-66	1.63227e-63			FAM92B	0.0135481	0.252909	4.22245	2.03472e-07	5.27955e-07
LINC02574	0.122568	0.357627	1.54487	2.28346e-08	7.00952e-08			B3GNT5	0.509439	1.50664	1.56435	8.22588e-42	6.16105e-40
SLC6A17	10.7573	3.35465	-1.68108	3.96364e-18	3.17823e-17			ANKRD55	0.927286	0.349677	-1.40699	2.41689e-14	1.40415e-13
SH3TC1	1.1486	3.03278	1.40076	3.72995e-53	2.94692e-51			AL139240.1	0.171496	0.0815289	-1.07279	1.52649e-16	1.13292e-15
AC099524.1	0.108845	0.318559	1.54929	8.96794e-48	5.70815e-46			AC015908.2	0.0687197	0.172195	1.32525	1.33597e-09	4.48809e-09
CLVS2	3.1974	1.24015	-1.36638	6.07655e-21	6.26109e-20			CD300A	2.31506	6.25007	1.43282	5.06268e-51	1.07085e-48
SLA	1.81477	5.38251	1.56849	3.53879e-53	2.8057e-51			GPR82	0.119673	0.642791	2.42526	1.21164e-32	4.42859e-31
PAQR9-AS1	0.156445	0.0759835	-1.0419	2.10011e-22	2.44357e-21			SERPINF1	5.77589	13.749	1.25121	3.11979e-14	1.78932e-13
TGFB2	3.43387	8.00841	1.22168	3.79221e-12	1.73494e-11			LILRB4	2.86779	7.99082	1.47841	2.64478e-46	2.93288e-44
AC093520.2	0.148349	0.369653	1.31718	6.76436e-18	5.32199e-17			OLFM3	1.76829	0.800034	-1.14422	2.75213e-06	6.18674e-06
CNTN4	1.04992	0.392373	-1.41998	7.01138e-31	1.63161e-29			LINC01426	0.0555633	0.20419	1.87771	5.74728e-31	1.81091e-29
OLR1	4.67478	16.5837	1.8268	2.28666e-47	1.42733e-45			SCNN1B	0.0783971	0.257673	1.71667	0.0341172	0.0438343
C1QC	55.2748	211.545	1.93627	1.58579e-76	3.25751e-73			GJA3	0.0948608	0.199256	1.07074	5.61319e-07	1.37835e-06
PHF24	8.91098	2.82605	-1.65679	1.14365e-13	6.07331e-13			ADPRH	0.778043	1.87602	1.26975	3.71707e-61	1.21304e-57
AP005271.1	0.228161	0.512791	1.16832	6.02546e-10	2.19776e-09			AL049612.1	0.750593	0.334695	-1.16519	1.50141e-13	7.93023e-13
IGHG1	1.25537	7.67873	2.61276	1.65512e-10	6.38537e-10			FOLR1	0.682309	2.49122	1.86835	2.40026e-12	1.1057e-11
RAMP3	5.8084	12.1189	1.06105	1.81212e-05	3.96693e-05			OR14I1	0.292801	0.11721	-1.32082	8.13478e-08	2.21096e-07
PART1	1.07261	0.331092	-1.69581	1.07478e-10	4.23022e-10			MSN	15.1067	45.3812	1.5869	5.18556e-58	5.3845e-55
UNC13C	1.28592	0.371295	-1.79216	4.22344e-15	2.57788e-14			IGKV3-20	0.292513	4.04376	3.78913	7.42587e-10	2.57532e-09
FO538757.2	0.141532	0.283236	1.00087	3.32855e-05	7.03705e-05			SPOCD1	0.718343	5.78021	3.00838	3.55868e-33	1.35265e-31
IL18	1.69044	6.09318	1.84979	7.14133e-70	2.44493e-67			CD36	0.189993	0.417059	1.1343	0.000116232	0.000212484
AC104051.2	23.5885	5.60212	-2.07403	0.0025857	0.00419376			AL589765.1	0.846098	0.403964	-1.0666	9.54426e-21	1.11638e-19
MMP14	10.5112	21.1526	1.0089	4.74725e-28	8.83599e-27			AC087885.1	0.151495	0.0531187	-1.51198	7.49945e-22	9.9257e-21
LINC00398	0.148133	0.0611585	-1.27627	0.000250349	0.000469764			AC112493.1	0.840669	0.395075	-1.08941	8.24343e-08	2.23862e-07
FCGR2B	0.0682962	0.399096	2.54686	5.5425e-26	8.70921e-25			AC069528.2	0.0664538	0.151525	1.18913	1.89992e-19	1.94365e-18
AL355922.1	0.165411	0.931684	2.49378	2.35324e-40	1.06561e-38			CHRNA1	0.454174	1.22625	1.43294	0.0141761	0.0193258
APLNR	29.9341	62.2479	1.05624	1.55405e-11	6.70012e-11			TOM1L1	0.337312	0.698516	1.05021	0.009045	0.012695
TLR5	0.596132	1.78158	1.57946	2.13101e-59	2.2501e-57			TKTL1	0.53426	1.28416	1.26521	9.45719e-11	3.6555e-10
HTR6	0.361809	0.095643	-1.9195	2.40451e-32	6.42227e-31			C17orf102	0.463621	0.22508	-1.04251	1.95796e-12	9.10951e-12
CA3	1.12554	3.52306	1.64621	3.90009e-17	2.8659e-16			MAOB	19.8069	64.9711	1.7138	2.10236e-15	1.36633e-14
AC080013.1	0.400409	0.160581	-1.31818	1.54335e-19	1.3955e-18			CLEC5A	0.133011	1.01259	2.92843	4.00492e-38	2.19924e-36
IGLC3	0.384566	2.79781	2.863	4.69687e-13	2.33768e-12			PDCD1	0.0701585	0.257011	1.87314	7.26499e-28	1.72696e-26
PIFO	1.78683	5.67384	1.66693	6.03943e-32	1.55076e-30			FCGR1B	0.596007	1.42803	1.26063	1.21316e-33	4.74546e-32
SLC35F3	1.44278	0.528837	-1.44796	2.24596e-22	2.60388e-21			ST6GALNAC2	0.249652	0.656201	1.39422	7.49902e-18	6.48892e-17
HMGA1P4	0.114266	0.313341	1.45534	9.57419e-27	1.60251e-25			AC097641.1	0.532285	0.215208	-1.30646	8.50691e-23	1.23073e-21
FAM163B	20.6836	7.5936	-1.44563	1.853e-21	1.97315e-20			FBLN5	2.16183	5.97767	1.46733	8.01182e-26	1.55103e-24
AC017076.1	0.323956	0.114992	-1.49427	1.77542e-08	5.51364e-08			AL122019.1	3.71668	1.717	-1.11413	1.68628e-08	4.98917e-08
HCRTR1	0.166663	0.0702791	-1.24576	7.34476e-17	5.28416e-16			MPPED1	3.56753	1.5716	-1.18269	1.10016e-06	2.59842e-06
AC241377.2	0.190524	0.489091	1.36013	1.98919e-19	1.78364e-18			CXCL6	0.0333767	0.459422	3.78291	1.40336e-05	2.87933e-05
TMEM52B	0.392176	1.15991	1.56443	9.28149e-50	6.33609e-48			FOXJ1	2.96914	11.9411	2.00782	9.80727e-15	5.94106e-14
SCRT1	11.9862	3.69932	-1.69604	1.27692e-35	4.35193e-34			S100A6	109.673	277.223	1.33784	5.8537e-34	2.35841e-32
AL359764.1	2.74864	1.12333	-1.29093	2.58245e-24	3.5216e-23			AC004687.1	0.380916	0.891429	1.22665	3.16964e-16	2.26769e-15
NFAM1	0.855451	2.49176	1.54241	7.38872e-63	1.09839e-60			PLP2	6.25002	16.5199	1.40227	1.26502e-23	1.99435e-22
FOSL1	0.82213	2.17243	1.40187	2.11583e-18	1.74042e-17			AL031056.1	3.44269	7.27136	1.07869	2.98968e-10	1.08666e-09
INA	42.5164	13.7022	-1.63362	1.88932e-35	6.39089e-34			OGN	0.488866	1.9482	1.99463	3.37352e-12	1.52876e-11
PCLO	1.34643	0.459875	-1.54983	8.23784e-19	7.01894e-18			AL390115.1	0.136152	0.391715	1.52459	0.00750883	0.0106641
FABP4	0.488648	1.78955	1.87273	1.10341e-10	4.33536e-10			MCHR2	0.639388	0.239092	-1.41913	7.60511e-08	2.0749e-07
LINC01616	0.407816	0.148125	-1.4611	2.39393e-12	1.11786e-11			VDR	0.0579279	0.191808	1.72733	4.50219e-19	4.46583e-18
GNG12	7.35561	15.3604	1.0623	2.34589e-25	3.50118e-24			AC109826.1	0.192447	0.474962	1.30335	4.31626e-47	5.10884e-45
Z68323.1	0.2988	0.0571521	-2.3863	5.415e-17	3.93559e-16			NCF1B	0.187542	0.556994	1.57045	1.34578e-45	1.38482e-43
Z69720.2	0.22797	0.0997812	-1.19201	4.45407e-07	1.18335e-06			NLRC4	0.451522	0.93588	1.05153	4.72371e-36	2.28136e-34
P3H2	0.714165	2.39556	1.74603	4.74691e-50	3.31053e-48			PEAK3	0.357881	0.768807	1.10314	7.17032e-25	1.27569e-23
DENND3	1.66671	3.43356	1.0427	2.08689e-40	9.50715e-39			CHODL	0.531241	1.11652	1.07157	1.53993e-07	4.05373e-07
AC008759.3	0.863828	2.42089	1.48672	2.80047e-22	3.20727e-21			MXRA5	0.685477	1.52956	1.15793	2.20824e-13	1.14569e-12
AL390778.2	0.163691	0.0385071	-2.08778	5.00374e-13	2.48439e-12			PPP1R42	0.397798	0.829876	1.06086	2.46237e-19	2.49337e-18
AL512631.1	0.287528	0.661146	1.20127	5.49835e-24	7.29969e-23			DDR2	3.61997	7.75504	1.09916	4.87403e-17	3.81833e-16
TBXAS1	1.91636	5.88031	1.61752	3.38989e-76	4.50576e-73			TNFRSF12A	3.40858	13.461	1.98154	6.20325e-36	2.97704e-34
LINC01202	0.595393	0.0832634	-2.83809	6.62436e-15	3.97145e-14			DOK3	1.01914	2.33244	1.19449	1.53691e-35	7.07844e-34
AP000843.1	1.3374	0.439973	-1.60395	4.00003e-18	3.20626e-17			RHOH	0.0935835	0.298133	1.67163	1.70904e-48	2.3378e-46
AC016717.2	0.878863	0.330781	-1.40976	3.07736e-26	4.92464e-25			TMEM71	0.197256	0.800048	2.02002	5.51128e-35	2.44465e-33
LRRC25	0.981434	3.53023	1.8468	1.75501e-66	3.96562e-64			OPTC	0.477643	0.165115	-1.53246	1.99152e-23	3.06152e-22
ATP8A2	3.14891	0.995709	-1.66106	2.23758e-30	4.96176e-29			ARHGAP9	0.933881	2.11208	1.17736	2.54095e-41	1.79153e-39
AC011995.2	0.584519	0.230059	-1.34525	4.57353e-13	2.2793e-12			CHRM1	8.30363	3.54613	-1.2275	8.96631e-20	9.50911e-19
TMEM132D	2.09829	0.435119	-2.26973	3.73867e-27	6.42914e-26			GEM	4.79104	11.714	1.28982	5.62876e-30	1.60529e-28
PPIAP48	0.175987	0.610993	1.79569	6.77548e-30	1.45255e-28			AC007881.2	0.0530892	0.160055	1.59208	3.7699e-16	2.68285e-15
SYP-AS1	0.145786	0.0723674	-1.01044	6.06308e-09	1.99072e-08			LINC00648	0.376485	0.170143	-1.14584	3.70773e-05	7.21214e-05
HP	0.058357	0.590029	3.33781	1.68765e-12	8.00465e-12			UPK3A	0.128485	0.513667	1.99923	5.31526e-28	1.28353e-26
C16orf54	0.167757	0.55883	1.73604	3.80313e-62	5.30467e-60			TUBA1C	2.01872	4.60199	1.18882	6.69865e-23	9.83444e-22
IGLV1-47	0.214962	2.01307	3.22724	1.17009e-10	4.58617e-10			RSPH1	2.09902	5.26208	1.32592	5.84566e-11	2.30397e-10
PPP2R2C	12.6848	4.99277	-1.34519	1.32205e-18	1.10559e-17			PLCB2	2.60318	5.59606	1.10413	2.32245e-33	8.93165e-32
RDH10	2.51018	6.15151	1.29315	1.80029e-18	1.48954e-17			PAPPA2	0.159023	0.458022	1.52619	1.36604e-10	5.18543e-10
SPRY4-AS1	0.34554	0.149261	-1.21101	6.47986e-13	3.17888e-12			CFAP73	0.214876	1.453	2.75746	0.0224164	0.0296497
SYT1	41.4677	10.7246	-1.95106	1.00487e-18	8.50731e-18			JUNB	32.155	66.1629	1.04098	4.58175e-18	4.06942e-17
IGFBP7-AS1	0.697207	2.59318	1.89507	1.71042e-13	8.91344e-13			NFATC2	0.874307	2.23276	1.35262	2.55002e-50	4.58683e-48
CLEC7A	0.703885	2.55954	1.86247	1.854e-59	1.97608e-57			TNNI2	0.194896	0.514797	1.4013	7.10485e-31	2.20521e-29
NRIR	0.223355	0.46377	1.05407	0.00490102	0.00760767			SLFN13	0.219847	0.503321	1.19498	2.28455e-13	1.18314e-12
MAP3K9	1.64691	0.578191	-1.51015	9.87403e-24	1.28006e-22			CCR2	0.0329192	0.23903	2.86019	2.11778e-41	1.51183e-39
FRAS1	0.347668	0.173486	-1.00289	5.75206e-14	3.14554e-13			SLC8A2	8.34204	4.1526	-1.00638	1.27642e-20	1.47713e-19
CCDC177	0.473082	0.2216	-1.09413	1.49116e-09	5.21342e-09			PTX3	1.01872	2.63705	1.37216	6.93734e-08	1.90271e-07
CD48	0.231736	0.975303	2.07337	4.86033e-30	1.04994e-28			PTAFR	2.40853	6.64093	1.46323	1.71584e-45	1.74208e-43
CCL17	0.234395	0.702037	1.58261	3.58323e-10	1.33675e-09			MAP3K8	1.00098	2.08058	1.05557	2.35995e-25	4.40447e-24
RPSAP69	0.502771	0.112501	-2.15996	1.50779e-17	1.15296e-16			VAV3	0.458824	1.25174	1.44792	1.17049e-08	3.51826e-08
EPHA6	0.292151	0.143888	-1.02177	6.5934e-08	1.92561e-07			GABRE	0.159025	0.321167	1.01406	5.41618e-06	1.17589e-05
IBSP	0.113637	2.2516	4.30845	2.42247e-05	5.21613e-05			HOXB2	0.324417	1.06994	1.72161	2.48263e-25	4.61459e-24
GLIPR1	1.6325	3.79879	1.21845	1.44134e-38	5.98684e-37			ADAMDEC1	0.281175	0.708371	1.33304	4.68599e-09	1.47569e-08
NLRP4	0.0603261	0.199841	1.728	9.43419e-14	5.04676e-13			C8orf34	0.226283	0.64456	1.51018	1.18246e-15	7.92143e-15
TMEM63C	5.25059	2.49139	-1.07553	1.92862e-34	6.04424e-33			MYOD1	0.678218	0.267137	-1.34417	9.97901e-16	6.74639e-15
DLGAP2	0.955317	0.350692	-1.44578	1.87197e-12	8.83806e-12			AP000280.1	0.0557074	0.161944	1.53956	3.27307e-18	2.9706e-17
AC097493.1	0.0674826	0.170136	1.3341	1.47605e-05	3.27245e-05			LAIR1	1.47678	4.90561	1.73198	3.72689e-58	4.25686e-55
CARD9	0.62551	1.46588	1.22866	2.41749e-46	1.45281e-44			AC015908.3	0.19031	0.556843	1.54892	1.32998e-16	9.93526e-16
KCNH7	0.68172	0.166255	-2.03578	4.89599e-32	1.27454e-30			AC226101.1	0.146197	0.0660466	-1.14636	1.03081e-09	3.51198e-09
SEC61G	25.1782	54.5251	1.11474	8.15988e-06	1.86582e-05			CCL22	0.0877931	0.310698	1.82333	6.55029e-24	1.05824e-22
WDFY4	0.473433	1.51707	1.68005	6.88693e-67	1.63807e-64			ASIC4	30.7997	14.6611	-1.07092	1.30634e-19	1.36327e-18
GYPC	3.14965	8.83785	1.4885	2.28996e-58	2.27947e-56			CPED1	0.421628	0.913126	1.11484	1.55251e-38	8.88859e-37
AP003481.1	1.82861	3.75737	1.03897	2.73779e-24	3.72445e-23			WDR63	0.110775	0.557508	2.33137	1.79898e-08	5.30269e-08
GNA15	1.25786	3.07233	1.28837	3.47726e-53	2.76663e-51			IFI44	6.83024	13.8852	1.02354	6.82408e-18	5.93186e-17
LTB	0.412864	0.860638	1.05974	1.22516e-18	1.02761e-17			TCIM	4.61956	12.3805	1.42225	1.77792e-17	1.47102e-16
LEMD1	0.393272	0.181518	-1.11542	2.69337e-20	2.61761e-19			EMP1	8.51588	22.2338	1.38453	2.73831e-31	8.87291e-30
GUCY1B1	10.8544	4.96954	-1.12709	4.49236e-24	6.01002e-23			SAPCD2	24.3566	12.0426	-1.01617	1.19693e-20	1.38866e-19
CPA3	0.0643221	0.294262	2.19372	0.000486954	0.000877799			VAV1	1.34507	3.59915	1.41998	9.76565e-50	1.59348e-47
CYTIP	0.365701	1.25492	1.77886	1.59195e-64	2.76706e-62			SMIM32	1.15229	0.530455	-1.11921	1.27242e-17	1.06786e-16
TNXA	0.183546	0.519379	1.50065	1.51527e-24	2.10483e-23			VWC2L	1.62589	0.63237	-1.36239	4.97142e-15	3.10462e-14
SCGB1D2	0.501455	1.52562	1.6052	3.68171e-14	2.05514e-13			ALOX5	1.64042	5.45264	1.73289	8.14972e-56	4.32959e-53
TNFAIP2	2.7125	5.51333	1.0233	5.22315e-21	5.39654e-20			UCN2	0.0631741	0.144815	1.1968	0.0271312	0.0354264
AC245164.1	0.184812	0.0543991	-1.7644	6.9723e-10	2.52761e-09			PLEKHA4	4.98947	14.8481	1.57332	8.74598e-36	4.12796e-34
C4orf47	0.985325	1.9986	1.02032	6.76371e-08	1.97305e-07			LINC02156	0.0938746	0.201422	1.10141	6.93612e-06	1.48597e-05
PCP4L1	6.65599	2.55988	-1.37858	7.68138e-16	5.04413e-15			DTHD1	0.134566	0.322784	1.26226	1.8379e-08	5.41182e-08
MADCAM1	1.33353	0.630888	-1.0798	2.39762e-26	3.88364e-25			IER3	3.85614	9.88092	1.35749	5.21996e-23	7.72311e-22
AL591501.1	0.163651	0.0458117	-1.83684	5.97063e-11	2.41389e-10			AC022034.1	0.246799	0.689115	1.48141	0.000140493	0.000254018
GABRA5	4.92566	1.73115	-1.50858	5.59748e-12	2.51455e-11			CHGA	33.6173	13.287	-1.33919	9.86287e-25	1.73313e-23
FYB1	2.02249	6.36057	1.65302	1.3097e-60	1.58256e-58			OAS1	2.10262	5.81269	1.46702	8.99966e-36	4.23893e-34
AC116456.1	0.165874	0.0582916	-1.50873	8.22331e-22	9.03325e-21			EPHX3	0.107059	0.300548	1.48919	2.37955e-34	9.95574e-33
SVOP	8.49178	2.16851	-1.96936	2.23426e-34	6.96348e-33			HTR2B	0.0888255	0.185203	1.06006	1.58329e-07	4.16212e-07
MIAT	8.36262	3.85617	-1.11679	3.49267e-20	3.36261e-19			SLC6A7	2.27352	0.795797	-1.51445	1.25018e-06	2.93426e-06
LINC01907	0.0787607	0.228831	1.53873	2.53551e-44	1.40079e-42			TMC3	0.319258	0.0491848	-2.69844	1.65117e-16	1.22188e-15
DOCK2	0.7961	2.65426	1.73729	9.06647e-71	3.53217e-68			PRMT8	1.25716	0.59207	-1.08633	1.12174e-13	6.02377e-13
AC022893.2	0.350248	0.080331	-2.12435	5.899e-35	1.91514e-33			IL1A	0.206928	0.622004	1.58779	4.22983e-23	6.332e-22
BX470102.1	0.173261	0.353383	1.02829	7.00452e-14	3.79554e-13			XKR8	1.23558	2.93663	1.24897	2.0059e-21	2.52606e-20
SAMD9	1.28435	2.74765	1.09716	5.27384e-20	4.99446e-19			PCDHGA3	2.23277	1.00962	-1.14502	2.28727e-07	5.90466e-07
IGHM	0.786804	4.32594	2.45894	1.00441e-10	3.96929e-10			RGS22	0.124295	0.47918	1.9468	1.32642e-05	2.73127e-05
DLEC1	0.395543	1.16473	1.55809	1.33293e-32	3.64193e-31			LINC01123	0.196951	0.089782	-1.13334	2.18375e-06	4.96474e-06
SERPINA1	1.32365	7.37515	2.47815	1.86831e-67	4.7434e-65			GDF5	0.102751	0.274515	1.41774	2.51471e-14	1.45655e-13
PTCRA	0.140067	0.614187	2.13256	2.51948e-35	8.42163e-34			LINC02217	0.581492	0.249323	-1.22174	0.0009125	0.0014766
FLNC	4.19956	10.5782	1.33278	1.26863e-16	8.95252e-16			GJA5	0.352136	0.882907	1.32613	3.68276e-08	1.0456e-07
LINC02520	0.702609	0.325471	-1.11019	2.80006e-05	5.9796e-05			STC1	0.193464	0.873613	2.17493	3.27416e-14	1.87362e-13
IGKV3-15	0.0509963	0.791146	3.95548	2.60532e-07	7.1159e-07			PLB1	0.403145	0.906718	1.16936	5.30906e-39	3.22554e-37
CDH22	4.45682	2.1596	-1.04525	2.57842e-21	2.71365e-20			HLA-C	105.234	215.635	1.03499	6.04133e-35	2.66425e-33
ANKRD33B	1.87831	0.729472	-1.36451	1.19438e-26	1.98297e-25			RFTN1	5.18514	10.6161	1.0338	1.10313e-24	1.92807e-23
AC006058.4	2.0204	0.889077	-1.18426	5.75728e-11	2.33306e-10			HSPB7	0.337174	0.868713	1.36539	1.90929e-15	1.24759e-14
AC012150.2	0.493306	1.0354	1.06963	2.10547e-13	1.0857e-12			C3AR1	6.58072	19.8863	1.59545	9.71635e-54	3.26412e-51
CYR61	13.1763	33.3994	1.34187	3.60853e-17	2.66031e-16			C2CD4A	0.0644776	0.197408	1.61431	0.00646407	0.00926614
AQP1	91.1663	204.431	1.16504	1.50229e-08	4.70618e-08			WSCD2	2.44386	1.05342	-1.21409	5.7892e-19	5.68811e-18
RTP5	18.6617	8.6719	-1.10566	2.52692e-19	2.24267e-18			LILRA6	0.0744039	0.183226	1.30017	2.56136e-23	3.89559e-22
TMEM179	11.033	5.49135	-1.00659	4.83826e-16	3.2297e-15			AC002091.1	0.283625	0.712759	1.32943	1.75672e-37	9.35445e-36
FAM92B	0.0296472	0.236749	2.99739	1.667e-05	3.66701e-05			IFIH1	2.09279	4.21912	1.01151	7.74327e-31	2.3936e-29
B3GNT5	0.576942	1.43888	1.31844	7.36117e-35	2.37279e-33			PLA2G5	1.17844	4.49799	1.9324	1.20619e-08	3.62174e-08
CCNO	1.4599	0.472209	-1.62837	3.74237e-07	1.00437e-06			DAPL1	4.50668	1.47647	-1.60991	1.76886e-07	4.62041e-07
PTPRN	16.0564	6.54513	-1.29466	1.74568e-22	2.04274e-21			IL10	0.0909483	0.389872	2.09988	1.5155e-41	1.11678e-39
ANKRD55	1.01611	0.26052	-1.96359	2.73973e-25	4.06214e-24			MS4A6A	1.99663	7.86357	1.97762	1.92163e-45	1.93382e-43
AL139240.1	0.169553	0.0834799	-1.02223	3.014e-13	1.52975e-12			MEDAG	0.15947	1.12702	2.82115	4.52213e-06	9.91111e-06
GREM2	1.07967	0.415381	-1.37809	3.75152e-17	2.75942e-16			SPNS3	0.450364	0.95735	1.08796	9.53477e-30	2.66274e-28
CACNA1B	2.24072	0.897644	-1.31975	1.08238e-11	4.73342e-11			AC025253.1	0.240041	0.110284	-1.12205	5.29822e-10	1.86865e-09
CD300A	1.97654	6.58987	1.73727	9.04728e-78	2.5267e-74			UNC93B1	2.99118	7.22168	1.27162	1.10319e-44	1.04569e-42
SLC2A13	5.99453	2.83268	-1.08148	1.4858e-31	3.69748e-30			PCOLCE	2.25669	4.57868	1.02073	8.21729e-13	3.99225e-12
GPR82	0.127702	0.634731	2.31336	4.86878e-31	1.1532e-29			RXFP1	0.82642	0.362925	-1.1872	4.33091e-11	1.73967e-10
CD99	63.2075	148.018	1.2276	7.28197e-38	2.8918e-36			ADIG	0.0886526	0.234506	1.40339	1.27391e-16	9.53514e-16
LILRB4	2.37361	8.48687	1.83815	7.80751e-73	4.20044e-70			CRTAC1	29.3884	14.4102	-1.02816	7.45232e-26	1.45133e-24
OLFM3	2.06699	0.500204	-2.04694	1.8574e-15	1.17827e-14			AC012558.1	1.82263	0.886598	-1.03967	3.13235e-16	2.24171e-15
LINC01426	0.0708963	0.188799	1.41307	2.34013e-28	4.46602e-27			AL049839.2	0.230148	0.965249	2.06834	1.33864e-31	4.47075e-30
GJA3	0.0853653	0.208787	1.29031	5.88462e-07	1.54185e-06			DYNLRB2	0.834187	1.78031	1.09368	1.13204e-08	3.40984e-08
ADPRH	0.795113	1.85888	1.2252	1.25491e-59	1.36327e-57			AC243960.1	0.345538	0.718716	1.05658	2.71107e-31	8.79712e-30
FOLR2	10.5782	28.1946	1.41433	3.51876e-32	9.27771e-31			VGLL2	0.0477021	0.196501	2.04241	3.80699e-07	9.56206e-07
AL049612.1	0.733347	0.352006	-1.0589	5.30304e-12	2.39272e-11			UNC13A	13.8009	6.53116	-1.07935	6.39041e-31	1.99976e-29
OR14I1	0.344648	0.0651675	-2.4029	4.09915e-16	2.75422e-15			SLC47A2	0.325955	1.56965	2.2677	2.80374e-16	2.01474e-15
MSN	17.7682	42.7096	1.26526	2.96101e-40	1.33016e-38			AL512785.1	0.173012	0.856991	2.30841	8.5428e-17	6.49207e-16
IGKV3-20	0.217079	4.11948	4.24617	5.15033e-10	1.892e-09			IFI44L	3.66164	11.8682	1.69655	5.20797e-25	9.4197e-24
SPOCD1	0.749263	5.74917	2.93981	1.73662e-36	6.31894e-35			SLC1A5	3.02095	6.94241	1.20044	7.57779e-40	4.83539e-38
AL589765.1	0.843656	0.406415	-1.0537	4.8394e-22	5.42416e-21			NCR3LG1	1.52847	0.730431	-1.06527	2.2055e-17	1.80194e-16
AC087885.1	0.156609	0.0479855	-1.70649	1.02764e-24	1.45247e-23			MYO1F	1.67983	4.40208	1.38988	5.67422e-50	9.74601e-48
AC112493.1	0.846341	0.389381	-1.12006	4.45887e-06	1.04885e-05			FBXO17	0.958925	2.04976	1.09597	0.000404593	0.000685749
MICAL2	2.94517	1.20059	-1.29461	8.81567e-10	3.15938e-09			LAIR2	0.0548363	0.164463	1.58456	5.65324e-09	1.76328e-08
SAMD12	1.31561	0.594682	-1.14554	1.17269e-14	6.85414e-14			GPNMB	3.34575	12.3134	1.87982	3.82434e-25	6.96677e-24
AC069528.2	0.0695097	0.148458	1.09477	6.76851e-21	6.93681e-20			GPRC5A	0.105469	0.560539	2.41	3.15315e-26	6.41413e-25
TKTL1	0.49785	1.32071	1.40753	4.09398e-17	3.00447e-16			AP005901.3	0.941008	0.375999	-1.32348	9.95755e-12	4.29108e-11
HS6ST3	3.02411	0.991944	-1.60818	1.0377e-08	3.31606e-08			CPVL	4.61054	10.5008	1.18749	1.2521e-29	3.46282e-28
C17orf102	0.507056	0.18148	-1.48234	1.89573e-26	3.09508e-25			CLECL1	0.11823	0.38561	1.70554	9.53378e-32	3.2346e-30
MAOB	24.0059	60.7561	1.33964	3.41516e-06	8.16343e-06			GBP1P1	0.315642	1.29762	2.0395	1.44642e-32	5.22815e-31
CLEC5A	0.167823	0.977649	2.54238	2.13138e-27	3.73918e-26			AL645924.1	0.439795	1.38603	1.65606	3.13394e-06	6.99274e-06
PDE2A	16.3378	6.96449	-1.23013	5.67479e-33	1.58501e-31			MS4A7	3.58869	9.6045	1.42025	1.67564e-41	1.22295e-39
PDCD1	0.0697904	0.257381	1.8828	2.9978e-26	4.80754e-25			TNMD	0.067793	0.135976	1.00414	3.26683e-05	6.40249e-05
FCGR1B	0.499847	1.52455	1.60883	1.767e-52	1.35807e-50			GSDMD	1.97872	4.27448	1.11118	5.17166e-35	2.29847e-33
AC097641.1	0.516197	0.231358	-1.1578	1.30176e-20	1.30038e-19			LINC01711	0.242439	0.571583	1.23734	8.60093e-07	2.06234e-06
FBLN5	2.61124	5.52656	1.08164	7.97487e-10	2.87446e-09			KCNK5	0.0793383	0.338179	2.0917	1.6477e-11	6.92307e-11
DNM1	26.9533	9.24175	-1.54422	1.94467e-15	1.22983e-14			OLFM4	1.01085	0.504873	-1.00158	2.95804e-12	1.35147e-11
AL122019.1	3.91185	1.52109	-1.36275	0.000151987	0.000294235			VIM	80.3602	284.976	1.82629	4.15723e-44	3.72423e-42
MPPED1	4.1313	1.00569	-2.03841	1.86208e-14	1.06764e-13			KCNT1	1.53505	0.554124	-1.47001	2.07539e-20	2.35053e-19
AC124303.2	0.660369	0.299155	-1.14238	2.35843e-16	1.62028e-15			CPQ	3.19066	6.91665	1.11622	4.03481e-30	1.1682e-28
CXCL6	0.0415498	0.451218	3.44091	0.0017365	0.00288811			CCL20	0.0606527	0.229796	1.92171	6.82486e-25	1.21898e-23
AP001999.1	0.305103	0.118895	-1.35961	3.17312e-06	7.60661e-06			AL049749.1	3.98027	1.51671	-1.39192	2.80347e-24	4.709e-23
FOXJ1	3.3103	11.5986	1.80892	1.54198e-17	1.17871e-16			LRIT2	0.68523	0.308122	-1.15309	9.35056e-30	2.6177e-28
S100A6	105.723	281.187	1.41124	1.22746e-36	4.48072e-35			GPR183	1.75071	5.45621	1.63996	7.37063e-44	6.47595e-42
AC004687.1	0.30639	0.966238	1.65701	7.39168e-32	1.88088e-30			DDN	17.1847	7.63014	-1.17134	9.16815e-12	3.96662e-11
VSTM2A	8.09588	3.73358	-1.11663	2.06118e-30	4.59314e-29			CPXM2	0.529386	1.65975	1.64858	1.77431e-07	4.63333e-07
PLP2	6.98118	15.7859	1.1771	5.08512e-15	3.08135e-14			CNN1	0.561461	1.29173	1.20205	0.000902807	0.00146185
AL031056.1	3.31765	7.39687	1.15675	9.42565e-12	4.14927e-11			CACNA1I	1.38487	0.618343	-1.16327	5.21465e-16	3.64292e-15
MCHR2	0.752016	0.126036	-2.57693	1.32587e-16	9.33314e-16			AC023762.1	0.387859	0.165447	-1.22917	1.67869e-23	2.60693e-22
VDR	0.0627744	0.186943	1.57435	1.71375e-11	7.35919e-11			HOXA2	0.149121	0.551378	1.88656	1.47229e-09	4.92141e-09
RNVU1-4	0.176015	0.373122	1.08395	5.63279e-11	2.28671e-10			MARVELD1	2.01359	4.2926	1.09208	2.18263e-28	5.44917e-27
AC109826.1	0.177792	0.489673	1.46163	3.09918e-60	3.59124e-58			SCN2A	5.34657	2.66735	-1.0032	3.44522e-18	3.11941e-17
SIPA1	5.30201	11.6101	1.13078	2.41332e-64	4.06951e-62			LTF	0.759487	25.8113	5.08684	5.07791e-27	1.11861e-25
NCF1B	0.166514	0.578101	1.79568	3.50359e-63	5.4598e-61			TRIM38	0.537131	1.275	1.24716	3.62928e-57	2.76358e-54
NLRC4	0.402402	0.985185	1.29176	1.52543e-59	1.64136e-57			OR7E28P	0.171904	0.0630847	-1.44624	9.4481e-09	2.8724e-08
PEAK3	0.346137	0.780596	1.17323	1.52613e-31	3.7895e-30			DLGAP1-AS4	1.81191	0.768258	-1.23785	1.23261e-06	2.8969e-06
PPP1R42	0.38054	0.847198	1.15465	3.53907e-26	5.63558e-25			AL163636.1	0.0462906	0.222301	2.26372	4.38714e-09	1.38655e-08
SYNGR3	9.97066	3.47128	-1.52222	1.31106e-20	1.30909e-19			PDE6G	0.148839	0.312698	1.07101	1.17859e-28	3.02174e-27
LINC02389	0.246979	0.115861	-1.092	1.11696e-08	3.5584e-08			HOXA5	0.458818	1.50258	1.71145	8.88433e-12	3.85111e-11
TNFRSF12A	3.96819	12.8992	1.70073	1.45175e-35	4.94034e-34			DEFB131E	0.864847	0.318252	-1.44227	1.25392e-28	3.20767e-27
DOK3	0.936404	2.41548	1.36711	1.3375e-54	1.13617e-52			ENO4	0.10897	0.231335	1.08605	3.27889e-05	6.42342e-05
VWA5B2	2.79094	1.20109	-1.2164	4.36392e-30	9.48145e-29			CNTN6	0.868488	0.39915	-1.12157	4.86733e-11	1.9371e-10
OLFM1	46.7909	20.4466	-1.19436	2.97625e-28	5.61832e-27			DEF6	2.36958	5.77795	1.28593	5.48465e-45	5.35433e-43
RHOH	0.0825428	0.309216	1.9054	2.466e-65	4.80359e-63			AC010247.1	0.0727382	0.209759	1.52795	1.04422e-39	6.58958e-38
TMEM71	0.22873	0.768454	1.74832	4.60688e-23	5.62686e-22			AP000763.2	7.28513	1.58895	-2.19688	7.8723e-08	2.14294e-07
OPTC	0.463989	0.17882	-1.37558	3.59401e-13	1.81192e-12			RAB34	2.68441	7.531	1.48824	7.68683e-29	1.99317e-27
GPR83	1.0574	0.3026	-1.80504	1.65205e-18	1.37141e-17			ADAP2	2.50514	5.88395	1.23189	3.0219e-53	9.20431e-51
ARHGAP9	0.838854	2.20747	1.3959	1.24284e-63	1.97769e-61			GPR65	0.257593	1.34467	2.38408	2.22582e-56	1.33807e-53
CHRM1	9.22721	2.61905	-1.81685	2.00778e-29	4.18522e-28			LTBR	1.31575	3.09053	1.23197	8.12632e-55	3.53393e-52
GEM	4.66671	11.8387	1.34304	5.53265e-32	1.42875e-30			AL451164.1	0.467457	0.204243	-1.19455	0.0176496	0.0237239
CDKL5	2.56482	1.20315	-1.09204	1.0449e-13	5.56982e-13			CTXN3	0.894043	0.339535	-1.39679	9.48658e-08	2.55646e-07
AC055733.2	0.180005	0.369888	1.03905	1.52528e-10	5.91068e-10			AL645939.3	0.169138	0.348326	1.04224	6.36135e-07	1.55205e-06
AC007881.2	0.0457222	0.16745	1.87276	2.06457e-24	2.84805e-23			HGF	0.267719	0.947501	1.82341	1.30914e-33	5.11214e-32
LINC00648	0.374176	0.17246	-1.11745	2.23581e-07	6.14604e-07			TMPRSS3	0.0824894	0.248254	1.58954	0.000634595	0.00104805
UPK3A	0.185933	0.456002	1.29426	5.29771e-24	7.04574e-23			AC007906.2	0.185904	0.583198	1.64942	0.00613213	0.00882371
CAMKK1	6.76221	2.66609	-1.34277	8.9596e-07	2.29095e-06			CFAP43	0.30214	0.778664	1.36578	7.76138e-12	3.38748e-11
RSPH1	2.23432	5.12627	1.19807	8.17743e-10	2.94325e-09			GPX8	0.338137	1.15253	1.76912	2.9694e-22	4.10364e-21
PLCB2	2.24969	5.95088	1.40338	5.73817e-56	5.20721e-54			PAMR1	4.36905	8.98968	1.04095	1.65563e-06	3.82111e-06
SYP	51.2549	22.8679	-1.16437	3.35587e-28	6.32437e-27			GRM2	0.914933	0.425589	-1.10421	2.39566e-14	1.39218e-13
CYP21A2	0.339821	0.930736	1.4536	3.56245e-31	8.55442e-30			ZFY-AS1	0.0666611	0.151295	1.18245	1.81944e-06	4.18268e-06
PAPPA2	0.172181	0.444814	1.36928	3.52018e-06	8.39936e-06			GBP5	0.078132	0.607093	2.95793	5.3762e-51	1.12673e-48
CFAP73	0.272201	1.39546	2.358	0.00253769	0.00411996			C1RL	1.22403	4.08446	1.73851	2.94117e-41	2.04842e-39
NFATC2	0.839355	2.26785	1.43397	1.0038e-59	1.11185e-57			HOTAIRM1	0.765589	2.2725	1.56964	8.75688e-19	8.46919e-18
TNNI2	0.180373	0.529375	1.55331	3.76306e-39	1.59831e-37			PDE6A	0.0266579	0.185602	2.79958	0.000257353	0.000447717
GJB6	6.68683	2.27722	-1.55405	1.02574e-07	2.92722e-07			AC008708.2	0.310296	0.112008	-1.47005	1.48664e-10	5.61522e-10
SLFN13	0.23679	0.486313	1.03828	5.83396e-16	3.86655e-15			AC145098.1	0.373882	0.813923	1.12231	3.06563e-23	4.62863e-22
AC011767.1	0.253557	0.118691	-1.0951	2.66957e-12	1.2394e-11			ROPN1L	0.173938	0.842212	2.27561	0.0376425	0.0480179
AC002351.1	0.806528	0.233777	-1.78659	3.09284e-17	2.29585e-16			IGLV2-23	0.14259	2.06008	3.85276	5.90187e-10	2.07164e-09
CCR2	0.0389335	0.232993	2.5812	5.22627e-25	7.56036e-24			ATP8B4	0.41986	0.878202	1.06465	3.06921e-36	1.49495e-34
PPFIA4	3.84559	1.77329	-1.11678	3.99636e-23	4.92913e-22			WT1	0.0506823	0.15787	1.63918	0.00439373	0.00646758
SLC8A2	9.23166	3.25961	-1.50189	2.96055e-25	4.37233e-24			IRF5	1.91007	4.2227	1.14454	2.76554e-41	1.93791e-39
PTX3	1.16823	2.48697	1.09006	0.000886393	0.00154069			ST14	0.825253	2.59609	1.65343	5.95978e-26	1.17165e-24
PTAFR	2.02287	7.02806	1.79672	4.97291e-67	1.1954e-64			NPC2	22.0078	45.6547	1.05275	3.1083e-49	4.73373e-47
MAP3K8	1.00129	2.08027	1.05492	1.1937e-28	2.33328e-27			TENT5B	0.33827	1.09391	1.69325	1.34131e-09	4.50402e-09
STXBP5L	2.19669	0.893169	-1.29833	5.56902e-24	7.38051e-23			GFRA1	9.11234	4.1752	-1.12598	5.0644e-22	6.78939e-21
HOXB2	0.44893	0.944958	1.07376	1.73289e-31	4.27514e-30			PSTPIP2	0.413876	0.836368	1.01494	3.33517e-25	6.11466e-24
ADAMDEC1	0.28363	0.705907	1.31547	3.8375e-06	9.10651e-06			AL354798.1	2.65648	1.16104	-1.19409	3.08014e-33	1.17663e-31
C8orf34	0.240214	0.630576	1.39235	6.89093e-07	1.78974e-06			TLR1	0.67917	2.11627	1.63968	2.0604e-50	3.79579e-48
MYOD1	0.664885	0.280521	-1.24499	5.80874e-13	2.86144e-12			LINC01103	0.162467	0.0799155	-1.0236	2.51381e-25	4.66874e-24
AP000280.1	0.058766	0.158874	1.43483	1.17763e-14	6.88124e-14			SLC34A2	0.11767	0.412367	1.80918	1.26804e-18	1.20797e-17
DEFB124	0.297553	0.649062	1.12521	1.18184e-08	3.75174e-08			IL13RA1	7.95538	19.3293	1.28079	1.35566e-57	1.29036e-54
LAIR1	1.30093	5.08212	1.96589	3.20583e-77	7.24389e-74			PHEX	0.448385	1.09973	1.29434	5.02254e-34	2.03792e-32
AC015908.3	0.246283	0.500658	1.02351	9.0114e-08	2.59193e-07			PARP15	0.0711625	0.207835	1.54625	3.79054e-32	1.31e-30
AC226101.1	0.162323	0.0498595	-1.70293	1.19456e-19	1.08972e-18			ARMC3	0.167355	0.638658	1.93213	0.00342629	0.00512307
CCL22	0.0705875	0.327969	2.21608	6.00791e-41	2.79907e-39			RASSF9	0.0981263	1.19277	3.60353	1.9418e-22	2.71805e-21
SST	17.9055	8.69864	-1.04154	1.62276e-07	4.51707e-07			AREG	0.0642037	0.286936	2.16	4.38609e-10	1.56165e-09
NCDN	56.6356	25.332	-1.16074	1.14344e-08	3.637e-08			LPAR5	3.19082	7.51758	1.23634	1.52961e-38	8.77951e-37
CPED1	0.438217	0.896474	1.03262	1.8883e-33	5.45628e-32			APOC4-APOC2	0.149986	0.322172	1.103	1.69297e-21	2.14976e-20
WDR63	0.151066	0.517064	1.77516	0.00821604	0.012329			AL590764.1	0.26843	0.54713	1.02734	2.98589e-30	8.74483e-29
IFI44	6.68686	14.0291	1.06903	4.32764e-23	5.30587e-22			AC068506.1	0.0779461	0.284738	1.86909	1.17316e-10	4.49133e-10
TCIM	4.55195	12.4484	1.4514	1.8556e-20	1.83257e-19			LAPTM5	33.2075	94.298	1.50572	2.07057e-56	1.27838e-53
EMP1	7.93094	22.821	1.5248	1.66807e-35	5.66793e-34			TREM1	0.0783589	0.583024	2.89539	2.6844e-38	1.503e-36
SAPCD2	24.3828	12.0164	-1.02086	9.07573e-19	7.7009e-18			2020-03-11	0.692265	0.279365	-1.30917	1.33649e-23	2.10122e-22
VAV1	1.15837	3.78655	1.70879	3.7266e-74	2.47665e-71			FCGBP	2.9017	15.0079	2.37075	1.3515e-40	8.97493e-39
CAMK2B	14.0834	6.04829	-1.2194	1.93803e-16	1.33838e-15			SASH3	2.90232	8.64721	1.57503	3.64436e-54	1.36478e-51
SMIM32	1.14993	0.532829	-1.1098	4.33724e-20	4.1492e-19			LINC01007	0.77855	0.237199	-1.71469	1.73623e-06	4.00146e-06
VWC2L	1.75876	0.49899	-1.81748	7.21285e-25	1.03415e-23			CD4	6.73469	16.7352	1.31321	1.57857e-56	1.00169e-53
ALOX5	1.50951	5.58405	1.88724	2.20489e-68	6.15084e-66			AP003355.2	1.08011	0.462277	-1.22435	3.62155e-06	8.03367e-06
UCN2	0.0676562	0.140316	1.05238	7.69968e-07	1.98826e-06			PTGES3P1	4.47382	9.40594	1.07206	6.35565e-22	8.48064e-21
PLEKHA4	5.34063	14.4956	1.44054	1.36025e-41	6.53962e-40			AC114730.1	0.188162	0.0884122	-1.08966	7.13469e-14	3.93303e-13
DTHD1	0.110666	0.346774	1.64778	1.91894e-13	9.93655e-13			APOBR	1.12928	2.74089	1.27925	1.78549e-34	7.5393e-33
IER3	3.77241	9.96497	1.40138	8.4059e-29	1.66468e-27			TMEM106A	0.78002	1.92785	1.30541	7.38229e-50	1.24001e-47
RIMS3	13.6641	5.62484	-1.28051	1.55324e-05	3.43047e-05			AL353597.2	1.2679	0.446764	-1.50486	2.60428e-22	3.61434e-21
CHGA	35.3964	11.5012	-1.62182	1.86535e-31	4.59646e-30			OSMR-AS1	0.0635116	0.189725	1.57882	9.79005e-18	8.32319e-17
KCNA1	1.69205	0.617515	-1.45423	4.43939e-15	2.70822e-14			AC083805.2	0.151746	0.349159	1.20222	0.00227258	0.00348328
SLC28A1	0.100531	0.220125	1.13069	2.55319e-27	4.45153e-26			ARHGDIB	18.6643	45.2904	1.27892	2.95765e-60	6.44356e-57
OAS1	1.77116	6.14541	1.79482	1.09916e-37	4.28955e-36			HLA-DRB9	0.0874584	0.332727	1.92767	1.32114e-18	1.25489e-17
DLX1	2.13604	0.741658	-1.52611	1.01825e-13	5.43293e-13			AC012150.1	0.244399	0.507818	1.05507	1.40012e-15	9.28158e-15
EPHX3	0.10848	0.299122	1.46331	8.16239e-42	3.96639e-40			ACTG2	0.293335	1.08116	1.88196	4.16399e-16	2.94678e-15
PRTN3	0.218812	0.0792433	-1.46533	1.69669e-08	5.28513e-08			CD33	0.453529	1.15929	1.35397	3.29719e-49	4.89097e-47
SLC6A7	2.59873	0.469348	-2.46908	4.99351e-13	2.47985e-12			SERPINA3	0.257067	1.07113	2.05892	3.2928e-28	8.13198e-27
TMC3	0.327166	0.0412473	-2.98765	4.44562e-25	6.48503e-24			IFI6	81.9816	224.404	1.45272	1.13629e-17	9.58902e-17
AC138207.1	0.0782167	0.170607	1.12513	3.5492e-19	3.12053e-18			NPM1P25	0.302068	0.748819	1.30974	2.13802e-33	8.27811e-32
PRMT8	1.41992	0.428694	-1.72779	3.6429e-28	6.83679e-27			C2orf40	1.10768	2.7321	1.30247	1.90766e-09	6.29568e-09
IL1A	0.20536	0.623578	1.60241	6.84752e-26	1.07077e-24			RARRES2	2.04866	9.32504	2.18643	2.18201e-10	8.07873e-10
PCDHGA3	2.1956	1.04694	-1.06844	3.61928e-15	2.23141e-14			FAM181A-AS1	0.423127	1.00648	1.25015	4.90563e-16	3.44466e-15
LINC01123	0.22906	0.0575515	-1.9928	5.71765e-14	3.12899e-13			GNLY	0.406618	1.23113	1.59823	8.34618e-15	5.08834e-14
GDF5	0.125605	0.251574	1.00208	8.04544e-07	2.06985e-06			ADAM12	0.239583	1.09249	2.18902	1.33771e-12	6.32685e-12
LINC02217	0.657133	0.173395	-1.92212	2.63858e-07	7.20325e-07			STOML3	0.0123743	0.253392	4.35595	0.00637677	0.00914961
PPP1R14C	5.64077	2.45259	-1.20158	6.83659e-28	1.2458e-26			AC010857.1	0.499833	0.217543	-1.20015	8.52816e-10	2.93842e-09
DHRS3	12.0245	24.5091	1.02735	1.43145e-37	5.55758e-36			RIMS2	2.96422	1.19527	-1.31031	5.12318e-26	1.01416e-24
STC1	0.334258	0.732286	1.13144	2.5594e-05	5.49214e-05			FZD6	1.03794	2.13496	1.04049	1.05847e-13	5.70412e-13
ADCY1	6.46298	2.91817	-1.14713	9.47835e-09	3.04309e-08			AC015987.1	0.0910711	0.2045	1.16704	1.18781e-09	4.01634e-09
PLB1	0.393393	0.916507	1.22018	1.47981e-46	8.96457e-45			EPHA10	1.46951	0.708643	-1.0522	5.00299e-20	5.44749e-19
HLA-C	104.863	216.007	1.04258	1.82423e-33	5.28466e-32			CLEC10A	0.13181	0.413397	1.64906	1.33891e-24	2.31712e-23
KCNJ9	19.834	9.23818	-1.10229	5.3168e-28	9.83129e-27			PLVAP	4.13918	8.99385	1.11959	1.28242e-18	1.22116e-17
C3AR1	5.77768	20.6924	1.84053	4.26816e-70	1.50693e-67			AC079140.3	1.20196	0.599641	-1.00322	8.30404e-23	1.20443e-21
AC005082.1	0.201894	0.410088	1.02234	2.48919e-23	3.11956e-22			CCL18	0.356855	1.35263	1.92235	0.0291721	0.0379071
LINC01678	0.0981816	0.213057	1.11772	1.32224e-19	1.20086e-18			RPS27P16	0.0673653	0.173496	1.36483	0.00160086	0.00250754
VSTM5	0.589467	0.24123	-1.289	1.61069e-15	1.02695e-14			FRZB	2.77268	6.03817	1.12283	3.86241e-17	3.06151e-16
WSCD2	2.70205	0.794242	-1.76641	4.99986e-31	1.183e-29			LINC02559	1.56501	0.594961	-1.3953	1.20386e-26	2.54638e-25
LILRA6	0.0714675	0.186173	1.38129	8.84106e-27	1.48199e-25			SCN7A	0.338983	1.34799	1.99152	7.23939e-14	3.98882e-13
AC002091.1	0.244896	0.751634	1.61786	4.32675e-53	3.40653e-51			PRR15	0.22605	0.490075	1.11636	3.97176e-26	8.01511e-25
PSMB9	4.62385	9.43432	1.02883	2.80767e-29	5.78323e-28			EPSTI1	0.666779	2.03101	1.60692	4.23008e-43	3.48852e-41
SNORD115-21	0.256276	0.110579	-1.21263	6.45161e-10	2.34638e-09			IGKV3-11	0.357963	2.14547	2.58341	1.21359e-13	6.49107e-13
AC046168.2	2.01085	0.973522	-1.04652	5.765e-09	1.89699e-08			AMIGO2	0.62275	2.11993	1.76729	2.5021e-26	5.12169e-25
PLA2G5	1.8159	3.85812	1.08722	0.0116068	0.0170061			JPH3	15.9171	7.89134	-1.01224	9.01737e-29	2.3276e-27
DAPL1	4.34817	1.63557	-1.41061	0.0097772	0.0144793			RUNX2	0.346939	0.814728	1.23164	1.27145e-40	8.46793e-39
AL606491.1	0.233992	0.471309	1.01021	6.72523e-32	1.7171e-30			UPP1	2.20812	4.45685	1.0132	2.60402e-17	2.11169e-16
IL10	0.0869333	0.393902	2.17986	1.94766e-44	1.08665e-42			ZNF99	0.146818	0.0627417	-1.22653	1.22342e-16	9.16622e-16
MS4A6A	1.82143	8.03943	2.14202	3.09964e-55	2.72527e-53			ATF3	2.95411	7.00141	1.24492	6.69655e-21	7.95094e-20
SPNS3	0.392002	1.01593	1.37387	4.65171e-48	2.96921e-46			HLA-E	93.3168	198.523	1.0891	1.40578e-58	1.88903e-55
AC025253.1	0.267523	0.0826988	-1.69372	1.21085e-17	9.33485e-17			SELE	0.0625372	0.389747	2.63975	1.04242e-09	3.54871e-09
UNC93B1	2.70694	7.507	1.47157	4.16266e-63	6.44243e-61			PLXDC2	3.87159	8.64843	1.15951	5.11324e-44	4.54501e-42
RXFP1	0.92317	0.265809	-1.79621	1.47878e-20	1.47071e-19			LCN9	0.738074	0.2527	-1.54634	1.78259e-12	8.3326e-12
ADIG	0.0881182	0.235043	1.41541	2.47376e-16	1.6959e-15			S100A10	22.1968	66.2519	1.57761	2.75508e-36	1.34769e-34
SOSTDC1	0.621723	0.244814	-1.34459	4.04924e-14	2.25305e-13			ADAM28	1.15041	2.92161	1.34462	4.85347e-39	2.97246e-37
CRTAC1	29.6434	14.1542	-1.06648	8.44885e-24	1.09908e-22			CISTR	1.56422	0.568414	-1.46043	5.98103e-23	8.82644e-22
OPRK1	0.439262	0.143627	-1.61276	1.76271e-18	1.46059e-17			CX3CR1	11.5523	32.0519	1.47224	5.1198e-28	1.23764e-26
AL589765.7	0.274794	0.136612	-1.00827	1.62201e-20	1.6082e-19			CST6	0.0619638	0.18454	1.57443	3.47816e-11	1.41178e-10
AL049839.2	0.268531	0.926721	1.78705	5.96829e-24	7.88651e-23			TRDC	0.524432	1.15042	1.13333	7.75512e-05	0.000144861
AL354863.1	1.19114	0.320472	-1.89407	6.27587e-20	5.88666e-19			CD163	1.9231	13.3157	2.79162	4.08315e-32	1.40687e-30
GS1-24F4.2	0.187588	0.0928132	-1.01517	3.62391e-11	1.50387e-10			SLC2A5	4.44808	10.5703	1.24877	2.72544e-37	1.42798e-35
AC121757.1	0.27442	0.132501	-1.05038	1.85015e-09	6.41787e-09			PKIB	0.957201	2.10736	1.13855	1.1454e-06	2.70025e-06
AC090241.2	0.159558	0.0767803	-1.05527	1.20864e-11	5.25809e-11			LINC01106	0.232688	0.109317	-1.08988	7.07244e-06	1.5129e-05
DYNLRB2	0.802806	1.81181	1.1743	5.02408e-12	2.27276e-11			GPR34	11.0886	25.9483	1.22657	1.69803e-35	7.77351e-34
AC243960.1	0.297249	0.767189	1.36791	3.78037e-51	2.72042e-49			XAF1	0.585868	1.28368	1.13164	1.60903e-12	7.54447e-12
ITPR1	4.4021	1.78205	-1.30466	5.08936e-06	1.18997e-05			CFH	0.98167	2.79565	1.50987	1.02217e-23	1.63062e-22
VGLL2	0.0611844	0.182968	1.58036	8.07797e-05	0.000162263			LINC00507	1.08238	0.369355	-1.55113	1.20164e-06	2.82877e-06
AC118755.1	0.295745	0.147092	-1.00764	3.28177e-10	1.23018e-09			SECTM1	0.59621	2.03251	1.76937	4.71745e-28	1.14644e-26
UNC13A	14.7025	5.62606	-1.38587	1.83329e-43	9.7014e-42			HLA-DPB1	12.5932	60.7908	2.2712	1.59795e-55	7.93555e-53
SLC47A2	0.35432	1.54118	2.12091	5.75206e-14	3.14554e-13			AC023794.3	0.109142	0.249846	1.19483	7.39596e-27	1.59994e-25
AP003559.1	0.14453	0.0565524	-1.35371	3.46403e-15	2.14037e-14			IL6	0.180121	1.32012	2.87363	4.8505e-26	9.66884e-25
AL512785.1	0.241699	0.788043	1.70506	6.29846e-12	2.81989e-11			PRAM1	1.18432	2.9049	1.29442	3.96251e-31	1.26956e-29
IFI44L	3.48598	12.0446	1.78874	2.43664e-31	5.94582e-30			GABRG2	11.4881	4.38327	-1.39007	1.49589e-19	1.55116e-18
SLC1A5	2.6635	7.30122	1.45481	2.98543e-60	3.47726e-58			PARP14	3.28514	6.9682	1.08483	1.66022e-39	1.03907e-37
ANKRD34C	0.209334	0.0549529	-1.92954	1.18454e-09	4.18458e-09			OSM	0.518593	1.82809	1.81766	1.03602e-18	9.96914e-18
NFIA-AS2	2.67503	6.19797	1.21224	5.91854e-32	1.52318e-30			CIITA	0.391409	1.89798	2.27772	9.52053e-50	1.56465e-47
NCR3LG1	1.65773	0.600681	-1.46454	1.28224e-33	3.75305e-32			JAML	0.141125	0.301828	1.09676	8.27997e-19	8.02153e-18
MYO1F	1.45463	4.62814	1.66978	2.24827e-75	2.41913e-72			FRMPD2B	0.544567	0.22715	-1.26146	2.98898e-07	7.60868e-07
LAIR2	0.0531276	0.166178	1.6452	4.51672e-11	1.85361e-10			ECHDC3	0.59012	1.28518	1.12289	5.64276e-19	5.549e-18
LINC01374	0.238523	0.557609	1.22512	5.98938e-32	1.53966e-30			PLEK	2.32672	7.49273	1.68719	5.1043e-56	2.84397e-53
GPNMB	4.06231	11.5941	1.51302	8.6154e-18	6.73378e-17			GRIN1	21.0753	8.54946	-1.30165	7.27906e-18	6.31294e-17
GPRC5A	0.128044	0.537878	2.07064	3.44269e-15	2.12776e-14			TYMP	1.48779	7.63974	2.36036	3.13932e-42	2.41463e-40
AP005901.3	1.01393	0.302802	-1.74351	4.63618e-23	5.65959e-22			AC015712.7	0.396747	0.165737	-1.25933	1.99685e-07	5.18601e-07
PDE1A	3.66331	1.68768	-1.11811	1.51794e-11	6.5482e-11			SAA2	0.0161779	0.371144	4.51988	0.00220635	0.00338745
CPVL	4.56041	10.5511	1.21016	1.34845e-34	4.26745e-33			TCEA3	0.621936	2.03797	1.71229	2.72091e-17	2.201e-16
OR2W3	0.374244	0.176116	-1.08745	0.00257012	0.00417021			DGKK	1.44545	0.487823	-1.56709	3.92418e-18	3.52098e-17
CLECL1	0.105575	0.398313	1.91563	2.89049e-40	1.30107e-38			HSPB6	7.66532	20.5627	1.42361	8.58818e-16	5.84764e-15
GBP1P1	0.360789	1.2523	1.79535	1.80941e-18	1.49653e-17			LGALS3	7.45343	19.8046	1.40986	1.81524e-15	1.18852e-14
AL645924.1	0.455492	1.37028	1.58897	8.59895e-07	2.20447e-06			NCKAP1L	1.70923	4.73848	1.47108	1.45876e-52	3.87487e-50
MS4A7	3.07755	10.1176	1.71701	3.33979e-60	3.8503e-58			PLBD1-AS1	0.18208	0.555572	1.60941	4.56607e-19	4.52723e-18
LRRC73	2.76831	1.33659	-1.05045	4.62481e-24	6.17626e-23			STRCP1	0.187786	0.083618	-1.1672	4.27083e-27	9.48133e-26
GSDMD	2.01941	4.23363	1.06796	5.15036e-38	2.06343e-36			CORO6	3.54202	1.31172	-1.43312	9.4029e-23	1.35692e-21
TOR4A	0.909293	1.90468	1.06673	7.77233e-55	6.78083e-53			RN7SL138P	0.867132	1.79944	1.05322	1.15519e-32	4.23583e-31
TMC3-AS1	0.213387	0.0900743	-1.24428	7.56661e-24	9.89318e-23			ZFP36	25.585	66.2979	1.37367	4.06934e-26	8.18309e-25
OLFM4	1.11009	0.405264	-1.45374	6.73985e-18	5.30825e-17			AC010624.1	0.258675	0.56934	1.13815	5.91901e-08	1.63776e-07
VIM	83.6601	281.664	1.75136	3.06681e-42	1.51636e-40			VENTX	0.2024	0.716662	1.82408	4.83425e-32	1.65816e-30
KCNT1	1.66746	0.421215	-1.98502	5.9916e-28	1.10339e-26			AL022329.1	0.139711	0.0637661	-1.13159	2.56345e-11	1.05665e-10
IGLV2-11	0.0434157	1.06643	4.61843	2.89292e-10	1.09111e-09			HAMP	0.459983	3.04595	2.72724	1.32908e-41	9.8576e-40
CCL20	0.059086	0.231369	1.96931	1.92297e-30	4.29976e-29			IL2RA	0.0391539	0.305076	2.96194	9.55545e-22	1.24379e-20
AL049749.1	3.94673	1.55038	-1.34804	1.65806e-23	2.11312e-22			PDLIM1	1.86297	6.21703	1.73862	8.25783e-23	1.19849e-21
GPR183	1.6167	5.59073	1.78998	7.50861e-50	5.18852e-48			DSG2	0.040808	0.536783	3.71742	1.89341e-07	4.93249e-07
DDN	20.1638	4.63978	-2.11964	5.51338e-21	5.6912e-20			TNFRSF11A	0.254428	0.514199	1.01507	3.31375e-28	8.17487e-27
OPRD1	0.66154	0.273652	-1.27348	1.73199e-08	5.38915e-08			PRICKLE3	0.317072	0.70385	1.15046	1.58124e-27	3.65605e-26
CACNA1I	1.49821	0.504578	-1.57009	3.70762e-24	4.98379e-23			CABP1	5.90347	2.27048	-1.37857	3.00552e-23	4.54389e-22
AC023762.1	0.385416	0.167899	-1.19882	7.00144e-23	8.45562e-22			SP100	0.70119	1.93682	1.46581	5.45495e-62	2.49226e-58
HOXA2	0.175422	0.524976	1.58142	2.32656e-06	5.66864e-06			S1PR3	2.51966	6.90448	1.45431	1.86344e-37	9.89961e-36
SCN2A	5.94604	2.06561	-1.52536	1.71459e-32	4.63987e-31			COL4A6	0.342105	0.761279	1.15398	2.97041e-17	2.39098e-16
GNG3	43.3266	16.4317	-1.39877	1.10359e-09	3.90797e-09			LCP2	1.49132	3.75035	1.33043	2.45967e-52	6.31334e-50
LTF	1.44366	25.1246	4.12129	3.48784e-17	2.57469e-16			BHLHA9	0.151302	0.0656926	-1.20363	8.06892e-06	1.71132e-05
TRIM38	0.524414	1.28777	1.29609	1.24443e-67	3.19535e-65			IGLVIVOR22-1	0.305998	0.138165	-1.14714	1.38003e-21	1.76612e-20
PPEF1	0.397832	0.182863	-1.12139	8.09248e-07	2.081e-06			APOL4	1.09297	4.22158	1.94953	1.00219e-36	5.04275e-35
OR7E28P	0.163512	0.0715077	-1.19323	0.00152101	0.00254886			GALNT5	0.0178622	0.217667	3.60714	1.51041e-11	6.37897e-11
AC140125.2	0.213503	0.0698147	-1.61266	3.89912e-12	1.78097e-11			SH2D2A	0.0855159	0.258522	1.59602	2.40388e-33	9.22928e-32
DLGAP1-AS4	2.05365	0.525604	-1.96614	1.37305e-12	6.569e-12			AC026620.1	0.615678	0.280151	-1.13597	3.05624e-14	1.75596e-13
AL163636.1	0.0486082	0.219975	2.17807	1.74312e-13	9.07548e-13			SLC30A3	2.54329	1.17697	-1.11161	1.21679e-07	3.23816e-07
PDE6G	0.134625	0.326966	1.2802	1.23009e-42	6.24608e-41			IKZF1	0.661804	1.79865	1.44244	4.68675e-50	8.17283e-48
RIMBP2	2.49043	0.953441	-1.38518	2.24906e-17	1.69625e-16			PCSK2	8.40457	3.05586	-1.4596	1.22403e-26	2.58665e-25
MATK	3.33429	1.65178	-1.01335	6.06552e-06	1.4086e-05			HOXA10	0.450699	0.974837	1.113	8.25813e-16	5.63635e-15
PAX7	0.319405	0.143384	-1.15551	4.42e-11	1.81458e-10			FOS	47.3182	104.54	1.14359	4.89767e-17	3.83247e-16
DEFB131E	0.891427	0.291572	-1.61226	1.2472e-35	4.25706e-34			ANGPT1	0.560794	1.49186	1.41157	2.00252e-13	1.04251e-12
ANO5	3.01472	1.39072	-1.1162	5.93008e-30	1.27494e-28			IFITM3	56.5153	118.69	1.07048	3.33851e-24	5.56272e-23
PRSS3	2.875	1.07781	-1.41545	8.52562e-17	6.09636e-16			MCUB	1.05167	3.24986	1.6277	7.85636e-36	3.72346e-34
CNTN6	0.916448	0.351009	-1.38455	1.41308e-20	1.40784e-19			OLFML1	0.355951	0.7799	1.13161	1.32111e-15	8.77819e-15
CD99P1	0.205516	0.493815	1.26472	4.46204e-48	2.85621e-46			LINC00346	0.114732	0.257011	1.16356	3.4974e-18	3.16414e-17
DEF6	2.05176	6.09697	1.57123	3.8143e-68	1.02605e-65			TNNT1	2.65518	1.04933	-1.33934	6.84839e-26	1.33713e-24
AC010247.1	0.0648797	0.217648	1.74616	1.40057e-54	1.18529e-52			CYP2S1	0.325483	0.704132	1.11327	1.7361e-34	7.35796e-33
AP000763.2	7.24309	1.63116	-2.15071	1.79365e-05	3.93031e-05			F3	15.5112	38.9349	1.32775	2.19716e-19	2.23971e-18
ESRRG	0.893363	0.436643	-1.03279	2.33742e-23	2.9375e-22			AC083867.1	1.15674	0.550414	-1.07148	5.85611e-17	4.53826e-16
ADAP2	2.28481	6.10512	1.41794	2.51711e-71	1.01565e-68			SRGN	29.5753	65.8939	1.15575	3.80519e-38	2.09965e-36
GPR65	0.234677	1.36767	2.54297	3.50146e-65	6.705e-63			AC004067.1	0.415781	0.901854	1.11707	7.73286e-15	4.73973e-14
LTBR	1.41643	2.98947	1.07763	3.07205e-55	2.71156e-53			SQOR	1.07717	3.04284	1.49817	1.65449e-62	1.88976e-58
AL451164.1	0.530978	0.140481	-1.91828	1.21164e-07	3.42227e-07			SLC18A3	0.106681	0.773067	2.85729	0.00537181	0.00779728
CTXN3	1.07927	0.153608	-2.81273	2.10011e-17	1.58816e-16			PCED1B	0.752505	2.0032	1.41253	6.12491e-50	1.03643e-47
HGF	0.335446	0.879518	1.39063	3.56063e-26	5.66592e-25			ARSI	0.520644	1.15424	1.14858	1.30294e-15	8.67259e-15
GPR26	0.659685	0.166943	-1.98242	2.85909e-16	1.94825e-15			ZC3H12D	0.158428	0.317477	1.00282	2.48691e-26	5.09972e-25
CFAP43	0.328117	0.752588	1.19765	6.235e-12	2.79314e-11			ZBP1	0.062801	0.261714	2.05913	7.66925e-30	2.17096e-28
AL035409.1	0.266857	0.0962738	-1.47085	4.25708e-13	2.13099e-12			BLNK	1.05358	2.8179	1.41932	4.73651e-41	3.24927e-39
AL020994.2	0.263843	0.0989168	-1.41539	5.32343e-09	1.75911e-08			NAMPT	5.27466	12.404	1.23365	6.96141e-25	1.24046e-23
GRM2	1.03599	0.304071	-1.76853	5.12318e-26	8.0784e-25			FCER1G	13.6113	41.8056	1.61889	4.93236e-55	2.29949e-52
LINC02552	1.02422	0.28454	-1.84782	1.65089e-13	8.6211e-13			AC018410.1	0.823597	0.2992	-1.46083	1.18472e-19	1.24146e-18
ZFY-AS1	0.0601843	0.157797	1.39061	1.53511e-06	3.82061e-06			CASP1	1.22985	3.83537	1.64088	6.22235e-56	3.38436e-53
RGS7	8.1013	3.10897	-1.38172	2.92793e-30	6.44202e-29			CFAP100	0.103639	0.642279	2.63164	0.00397672	0.00589171
GBP5	0.0842066	0.600995	2.83535	5.73739e-46	3.41163e-44			AC146944.2	0.0783385	0.15862	1.01778	1.05654e-18	1.01581e-17
C1RL	1.35746	3.95052	1.54113	4.97266e-30	1.07318e-28			HS3ST3B1	0.332007	0.930402	1.48664	3.31993e-05	6.49932e-05
MORC1	0.0707002	0.170275	1.26808	2.03769e-21	2.16065e-20			XKR7	2.35774	0.73759	-1.67651	6.29522e-25	1.12968e-23
IL12RB2	0.152686	0.0745921	-1.03348	7.24838e-06	1.66668e-05			IGHV1-18	0.0812945	1.25078	3.94353	4.80792e-07	1.18986e-06
HOTAIRM1	0.85119	2.18657	1.36112	2.13264e-23	2.69062e-22			TNFAIP8	0.131363	0.438009	1.7374	1.56307e-47	1.94058e-45
ISLR2	2.04791	0.738494	-1.4715	5.54102e-15	3.34236e-14			LINC02100	0.094631	0.223349	1.23892	1.00867e-07	2.70796e-07
AC074135.1	1.11491	0.522773	-1.09267	1.68113e-14	9.69049e-14			AL731567.1	0.196662	0.465095	1.24181	2.27833e-21	2.84561e-20
AC008708.2	0.359754	0.0623625	-2.52826	2.68257e-17	2.0078e-16			ZDHHC22	52.0546	25.3459	-1.03827	3.4487e-30	1.00359e-28
AC145098.1	0.345947	0.841964	1.28321	6.32576e-31	1.48429e-29			MMP9	0.495409	3.47957	2.81222	1.36892e-08	4.08513e-08
IGLV2-23	0.104513	2.0983	4.32747	3.62042e-09	1.21991e-08			COL15A1	0.324371	0.910711	1.48935	2.131e-32	7.61825e-31
ATP8B4	0.373306	0.924932	1.30899	1.02024e-55	9.14818e-54			PRKCG	8.25114	3.72179	-1.1486	4.43904e-08	1.24868e-07
HOXC8	0.142592	0.30515	1.09763	5.66691e-05	0.000116187			LOXL2	1.93276	4.06986	1.07431	3.68256e-20	4.0581e-19
CYP1A1	0.178858	0.0878913	-1.02502	2.30375e-18	1.88734e-17			C1QA	47.841	156.421	1.70911	1.08106e-49	1.75147e-47
IRF5	1.66952	4.46416	1.41895	5.02727e-64	8.2316e-62			FAM20A	0.314668	0.85205	1.43711	7.86816e-26	1.52451e-24
HOOK1	0.657596	0.238909	-1.46074	3.31822e-09	1.12159e-08			EVI2B	3.28544	9.79729	1.5763	4.51803e-52	1.12185e-49
ST14	0.678329	2.74357	2.016	1.9253e-41	9.15874e-40			HLA-DRB6	2.65567	13.4262	2.3379	3.89655e-37	2.01387e-35
NPC2	21.393	46.2719	1.113	4.19224e-59	4.34532e-57			ARHGAP30	2.10373	4.96747	1.23956	6.85497e-49	9.72639e-47
TENT5B	0.464154	0.967551	1.05973	0.00121405	0.00206292			C11orf45	0.277678	0.632454	1.18755	3.87918e-43	3.23416e-41
GFRA1	9.36142	3.92518	-1.25397	7.39693e-24	9.68372e-23			TGFB2-AS1	1.30238	4.40388	1.75762	5.7451e-27	1.2559e-25
PSTPIP2	0.398824	0.851476	1.09421	2.79666e-30	6.15919e-29			MS4A4E	0.12648	0.40695	1.68595	6.60632e-21	7.84788e-20
NAPB	30.4711	11.6067	-1.39249	6.08636e-14	3.31951e-13			TRAF3IP3	0.184883	0.530928	1.5219	2.50692e-50	4.58144e-48
AL354798.1	2.66403	1.15347	-1.20763	1.70877e-32	4.62965e-31			SOD2	9.98851	31.6754	1.66502	2.64284e-34	1.09969e-32
SLC17A7	40.7496	12.5473	-1.69941	4.17877e-13	2.09458e-12			OTOG	0.513257	0.187817	-1.45035	1.54056e-09	5.1361e-09
TLR1	0.643076	2.1525	1.74295	1.00265e-57	9.68198e-56			PHETA2	0.738732	1.57991	1.09672	4.37834e-37	2.24761e-35
HPCAL4	25.9223	11.0197	-1.2341	1.16747e-14	6.82539e-14			LGALS1	58.4446	120.037	1.03833	5.41466e-20	5.86951e-19
IL13RA1	7.93418	19.3506	1.28622	9.14574e-60	1.01802e-57			GLP1R	0.838159	0.406553	-1.04378	3.65801e-10	1.31576e-09
PHEX	0.463185	1.08487	1.22786	3.51535e-31	8.4503e-30			HOXB7	0.534986	1.07229	1.00312	1.69304e-26	3.51599e-25
PARP15	0.0644534	0.21457	1.73512	1.60269e-43	8.50101e-42			METTL7B	5.7682	24.9803	2.1146	2.16884e-28	5.42067e-27
AC092720.1	0.278943	0.121837	-1.19502	1.31018e-29	2.7514e-28			APOC2	0.483532	1.22093	1.3363	3.5803e-24	5.94824e-23
TPSG1	0.189156	0.0850614	-1.153	0.00185044	0.00306633			CPA4	0.0602785	0.140519	1.22105	0.00270936	0.00411193
DCTN1-AS1	0.511907	0.176532	-1.53595	1.82933e-14	1.05019e-13			CSF2RA	2.95229	6.78816	1.20119	7.42949e-39	4.45457e-37
RASSF9	0.130792	1.15998	3.14876	2.11571e-12	9.92663e-12			CD70	0.062507	0.311098	2.31528	1.9932e-07	5.17712e-07
AREG	0.0734915	0.277613	1.91743	1.70826e-05	3.75289e-05			CD1C	0.0563303	0.183317	1.70236	1.43014e-25	2.72478e-24
AL133387.1	0.17475	0.058432	-1.58046	2.30138e-08	7.0626e-08			VSIG4	15.2881	42.476	1.47424	1.19243e-36	5.93463e-35
LPAR5	2.64569	8.06477	1.60799	1.12459e-62	1.63943e-60			VN1R85P	0.972986	0.460143	-1.08033	2.95856e-09	9.53788e-09
APOC4-APOC2	0.134968	0.337247	1.32119	1.12319e-34	3.57963e-33			ARHGAP25	1.23745	2.86119	1.20925	4.29147e-53	1.24094e-50
AL590764.1	0.236554	0.579127	1.29171	4.38797e-48	2.81678e-46			DENND1C	0.679009	1.45393	1.09845	1.15541e-42	9.29376e-41
AC068506.1	0.0794621	0.283216	1.83356	2.63151e-11	1.10544e-10			LRRC55	4.18188	9.72418	1.21743	4.99952e-16	3.50442e-15
LAPTM5	28.6152	98.9076	1.7893	6.20936e-81	7.01534e-77			DUSP9	3.12524	1.37441	-1.18515	8.04319e-21	9.46618e-20
TREM1	0.0920001	0.569331	2.62956	3.78381e-35	1.24816e-33			LHX5-AS1	5.99561	1.7643	-1.76481	2.94297e-18	2.6881e-17
2020-03-11	0.753755	0.217642	-1.79214	9.60185e-34	2.85854e-32			LINC01579	0.500489	1.07471	1.10253	0.0314112	0.0406341
FCGBP	2.53685	15.3741	2.59939	1.45933e-45	8.54278e-44			LINC01736	5.83234	15.1067	1.37304	5.73336e-28	1.37721e-26
SASH3	2.53259	9.01835	1.83225	1.80007e-76	3.38953e-73			APOBEC3F	0.240993	0.655686	1.44401	1.03823e-45	1.09297e-43
LINC01007	0.948076	0.0670309	-3.8221	5.31906e-13	2.62939e-12			MS4A14	0.359936	0.753118	1.06514	1.24626e-22	1.7838e-21
CD4	6.11949	17.3528	1.50368	6.2703e-75	5.66734e-72			ALDH3A1	0.0805106	0.342558	2.0891	9.24565e-11	3.57858e-10
AP003355.2	1.24634	0.295419	-2.07686	2.80253e-14	1.58117e-13			LINC00475	0.100249	0.699029	2.80176	3.14932e-09	1.01243e-08
PTGES3P1	4.32961	9.5507	1.14137	3.01372e-29	6.19074e-28			PTPN22	0.0471159	0.199765	2.08402	5.34291e-31	1.69049e-29
AP000547.1	0.264698	0.592649	1.16283	9.22746e-10	3.29911e-09			GALNT3	0.214005	0.552947	1.3695	1.17052e-05	2.4293e-05
APOBR	0.984697	2.88602	1.55133	2.32795e-55	2.06284e-53			LST1	3.6859	8.58338	1.21953	2.70273e-44	2.49964e-42
TMEM106A	0.687745	2.02047	1.55475	2.0768e-68	5.94018e-66			APOBEC3D	0.134957	0.35331	1.38844	9.12077e-37	4.59944e-35
NEUROD4	0.522357	0.253403	-1.0436	4.27839e-06	1.00934e-05			AC093802.1	0.274135	0.0910849	-1.5896	2.28997e-26	4.70855e-25
AL353597.2	1.18796	0.527014	-1.17257	3.22392e-12	1.48669e-11			C10orf55	0.0479884	0.156622	1.70653	5.34332e-24	8.71877e-23
SYNGR1	27.47	13.6982	-1.00387	1.92382e-30	4.29976e-29			MSLN	0.339178	0.987014	1.54103	9.75129e-17	7.37367e-16
OSMR-AS1	0.076346	0.176842	1.21183	1.17277e-10	4.59432e-10			GVINP1	0.0933162	0.217748	1.22246	7.36117e-35	3.21527e-33
NXPH2	0.864938	0.288692	-1.58307	5.03404e-15	3.05203e-14			NDNF	0.937121	2.58952	1.46638	1.64105e-16	1.21478e-15
WNT10B	2.02133	0.641001	-1.65691	1.22691e-16	8.6744e-16			CHIAP3	0.0922361	0.192056	1.05812	2.63653e-12	1.2099e-11
ARHGDIB	17.2212	46.739	1.44044	6.11623e-79	2.76405e-75			SLC17A6	1.04711	0.452226	-1.2113	1.15469e-12	5.51372e-12
CCDC200	0.136341	0.294705	1.11205	6.84401e-39	2.87984e-37			TNF	1.3182	3.33989	1.34123	1.15858e-10	4.44069e-10
HLA-DRB9	0.0827604	0.337442	2.02763	9.27993e-20	8.58679e-19			RBFOX3	3.08559	1.41371	-1.12606	6.00992e-15	3.72162e-14
AC012150.1	0.211603	0.540738	1.35357	4.87909e-24	6.50047e-23			RBM47	0.402672	1.41494	1.81306	6.03855e-57	4.31077e-54
ACTG2	0.423911	0.950091	1.16431	1.6924e-08	5.27251e-08			DSC2	0.195924	0.429484	1.13231	8.62334e-29	2.23093e-27
CD33	0.3851	1.22798	1.67298	9.38742e-74	5.58205e-71			AC106738.1	0.0672503	0.165704	1.30099	8.7403e-11	3.39045e-10
TRMT9B	1.08239	0.527768	-1.03624	8.5355e-15	5.06348e-14			APOL6	2.09869	4.41033	1.0714	6.9651e-31	2.16772e-29
SERPINA3	0.285565	1.04253	1.86819	1.95267e-22	2.27788e-21			NFKBIZ	0.561556	1.19649	1.09131	1.43484e-19	1.49124e-18
IFI6	76.398	230.008	1.59008	1.08696e-14	6.37618e-14			AC025154.2	0.0542109	0.150696	1.47498	0.00153279	0.00240719
NPM1P25	0.287677	0.763265	1.40773	3.17639e-41	1.49841e-39			AC002398.2	0.0533991	0.161241	1.59433	2.74354e-15	1.7595e-14
C2orf40	1.25397	2.58526	1.04381	0.000426937	0.000775863			FADS6	0.48017	0.188702	-1.34744	1.73048e-07	4.52715e-07
RARRES2	3.03019	8.33979	1.46061	0.0248334	0.034396			C6orf141	0.146879	0.513622	1.80608	2.28918e-06	5.19336e-06
GNLY	0.391034	1.24677	1.67283	1.58861e-15	1.01316e-14			LPIN3	0.41437	0.834973	1.01081	3.3092e-07	8.36416e-07
ADAM12	0.350251	0.981399	1.48645	0.00189732	0.00313965			CD226	0.0883968	0.20713	1.22847	2.45295e-31	7.99362e-30
GLT1D1	3.13178	1.03514	-1.59716	2.77739e-16	1.89543e-15			ALOX15B	0.992974	2.30514	1.21502	0.000161562	0.000289468
AC010857.1	0.564722	0.152408	-1.8896	2.0466e-17	1.54976e-16			CGAS	0.307367	0.692591	1.17204	1.07032e-41	7.99035e-40
RIMS2	3.19438	0.964247	-1.72806	5.90397e-40	2.62095e-38			BIRC3	0.320385	0.667127	1.05816	9.98618e-16	6.74924e-15
LHFPL5	0.18171	0.052042	-1.80389	3.97993e-19	3.48163e-18			Z82196.2	0.175167	0.0495045	-1.8231	2.68822e-17	2.17688e-16
CPNE7	1.92282	0.661939	-1.53846	8.64675e-19	7.35902e-18			CARTPT	2.2368	0.744357	-1.58737	0.00961179	0.013436
EPHA10	1.55558	0.622242	-1.32191	6.30454e-29	1.26404e-27			LPAR6	2.5984	5.95005	1.19528	1.72979e-45	1.74846e-43
CLEC10A	0.129119	0.416098	1.68822	1.37069e-22	1.61819e-21			EVC2	0.140852	0.396586	1.49345	2.95316e-16	2.11613e-15
PLVAP	4.1816	8.95127	1.09804	8.56846e-29	1.69538e-27			FAM19A2	2.25848	0.983207	-1.19979	1.67667e-20	1.92472e-19
CCL18	0.356351	1.35313	1.92493	0.000941633	0.00163006			FN1	14.0658	34.3088	1.28639	1.39067e-19	1.44731e-18
FRRS1L	8.35271	3.18455	-1.39115	1.35279e-31	3.37391e-30			AL162426.1	0.637183	0.292216	-1.12467	6.20123e-31	1.94589e-29
CHIT1	0.548664	1.24658	1.18398	1.28903e-05	2.88243e-05			SYTL3	0.910323	1.99126	1.12923	9.42925e-29	2.43117e-27
LINC02559	1.53083	0.629265	-1.28258	1.08101e-20	1.08853e-19			IGFN1	2.94485	1.32477	-1.15246	1.26806e-12	6.01488e-12
SYT5	6.30634	2.53465	-1.31501	3.05201e-14	1.71678e-13			ZFR2	1.98976	0.725642	-1.45527	1.36279e-16	1.01637e-15
SCN7A	0.372578	1.31426	1.81864	1.15288e-11	5.02711e-11			HTR5A-AS1	0.766769	0.319827	-1.2615	3.10954e-06	6.94101e-06
PRR15	0.231441	0.484664	1.06634	9.59686e-30	2.03807e-28			AC254562.1	1.84207	0.821173	-1.16557	2.94524e-27	6.60921e-26
EPSTI1	0.66934	2.02844	1.59956	4.21954e-34	1.28324e-32			BLACAT1	0.808302	0.346647	-1.22143	2.16531e-30	6.41562e-29
IGKV3-11	0.198187	2.30585	3.54037	6.84739e-19	5.87187e-18			ANXA1	5.253	30.3788	2.53185	1.02663e-40	6.85742e-39
AMIGO2	0.785852	1.95621	1.31573	1.60979e-11	6.92985e-11			HAR1A	2.02313	0.916248	-1.14278	1.63205e-22	2.30994e-21
JPH3	16.4129	7.39372	-1.15045	2.50788e-32	6.68256e-31			AL133415.1	0.148162	0.483979	1.70777	5.05322e-27	1.11532e-25
POM121L9P	0.216836	0.475736	1.13356	8.89261e-19	7.55688e-18			AC008083.2	0.125598	0.286594	1.19019	1.34319e-24	2.32277e-23
RUNX2	0.326118	0.835627	1.35747	3.04904e-51	2.20821e-49			HMOX1	9.41806	28.0318	1.57356	1.36911e-47	1.70907e-45
ZNF99	0.152697	0.0568404	-1.42568	1.05647e-19	9.7001e-19			C11orf88	0.0225203	0.416625	4.20945	4.1621e-05	8.04391e-05
FGF13	1.66202	0.809406	-1.038	3.17112e-21	3.31888e-20			SCIMP	0.44846	1.27987	1.51295	1.09889e-45	1.15152e-43
ATF3	3.06333	6.89179	1.16978	7.0679e-17	5.09755e-16			TLR3	0.747863	1.77384	1.24603	3.393e-43	2.86014e-41
HLA-E	93.3273	198.513	1.08886	6.916e-60	7.73634e-58			AC093642.2	0.608804	0.297288	-1.03412	1.04879e-14	6.3215e-14
SELE	0.0870582	0.365133	2.06837	0.000660929	0.00117004			HECW1	1.68872	0.82065	-1.04109	2.1314e-20	2.40919e-19
AC008750.1	0.318101	0.676319	1.08822	6.20772e-20	5.82877e-19			ADAM11	5.12282	2.46649	-1.05448	8.53049e-18	7.3177e-17
PLXDC2	3.74159	8.77892	1.23039	1.59487e-50	1.12618e-48			HLA-DMA	6.82645	24.6955	1.85504	3.66689e-60	6.44356e-57
LCN9	0.67592	0.31509	-1.10109	8.3743e-06	1.91272e-05			COL12A1	0.554809	1.23483	1.15424	7.45415e-11	2.90982e-10
S100A10	20.2097	68.2464	1.7557	2.89332e-46	1.73415e-44			CCDC89	0.510949	1.28174	1.32685	2.27201e-20	2.55926e-19
COL2A1	2.89592	0.562108	-2.3651	4.7296e-06	1.10946e-05			CEBPA	3.41003	8.26609	1.27742	5.8507e-39	3.5358e-37
ADAM28	1.23092	2.84079	1.20656	4.71832e-60	5.3846e-58			SKAP1	0.0442196	0.163389	1.88555	6.38959e-19	6.24845e-18
AP000439.3	0.470607	1.17165	1.31595	1.0021e-27	1.8057e-26			SYT16	2.36944	1.1161	-1.08608	2.42757e-14	1.40964e-13
CISTR	1.54163	0.591088	-1.38301	3.63274e-24	4.89186e-23			RPE65	3.38278	7.74953	1.1959	8.62475e-19	8.34847e-18
CX3CR1	10.1648	33.4447	1.7182	2.98122e-38	1.21595e-36			AL359399.1	0.737576	0.263251	-1.48635	1.41275e-22	2.01579e-21
MYADML2	0.568682	0.276489	-1.0404	2.14529e-14	1.22257e-13			SPATA17	0.202985	0.598119	1.55906	5.2155e-17	4.07187e-16
CD163	2.08215	13.1561	2.65958	3.84215e-32	1.01068e-30			SIGLEC10	3.84166	8.88425	1.20952	4.65205e-34	1.89432e-32
SLC2A5	3.77448	11.2465	1.57512	4.31643e-58	4.24061e-56			U62317.1	0.0589423	0.196943	1.7404	1.87977e-21	2.37771e-20
LINC01106	0.274224	0.0676238	-2.01975	7.97436e-14	4.3025e-13			AL117372.1	0.16661	0.0610852	-1.44758	0.000298358	0.000514819
GPR34	9.26674	27.777	1.58376	1.0901e-54	9.33031e-53			LPO	0.343836	0.105863	-1.69952	3.73603e-28	9.13768e-27
CFH	1.20452	2.57196	1.0944	2.84921e-09	9.68716e-09			IGHV4-34	0.0807254	0.745788	3.20767	1.32489e-10	5.03757e-10
LINC00507	1.29044	0.16051	-3.00712	9.70265e-16	6.31637e-15			SWAP70	2.5862	5.53217	1.09701	8.16239e-42	6.1336e-40
BSN	7.61771	2.9842	-1.35201	1.67914e-33	4.87684e-32			MYZAP	0.193537	0.622982	1.68658	7.80266e-15	4.77866e-14
SECTM1	0.612224	2.01643	1.71967	2.52016e-25	3.74888e-24			BASP1-AS1	0.627808	0.267802	-1.22915	4.76659e-23	7.07985e-22
HLA-DPB1	12.6116	60.7724	2.26867	9.51573e-52	7.04975e-50			LTBP1	3.53864	7.54746	1.0928	5.62649e-28	1.35439e-26
AC023794.3	0.0979444	0.261087	1.4145	5.4632e-46	3.25716e-44			ACTA2	6.62811	15.6112	1.23591	2.10769e-14	1.23299e-13
IL6	0.250346	1.24963	2.31951	5.55743e-21	5.73404e-20			AL357033.3	0.0703571	0.142373	1.01691	8.76879e-16	5.96351e-15
PRAM1	1.0203	3.06954	1.58904	2.31483e-51	1.69275e-49			RPS2P32	0.41332	0.875201	1.08236	2.59408e-09	8.43187e-09
GABRG2	12.7054	3.16137	-2.00682	3.78572e-33	1.07196e-31			MARCO	0.22627	1.39229	2.62134	1.2947e-07	3.43588e-07
ICAM5	5.56297	1.94734	-1.51435	2.7906e-18	2.27067e-17			MS4A4A	2.36767	6.67562	1.49543	1.06199e-36	5.32021e-35
PARP14	3.26564	6.98777	1.09747	7.75156e-40	3.4344e-38			DLEU7-AS1	0.193213	0.395361	1.03298	7.5438e-23	1.10186e-21
OSM	0.515325	1.83137	1.82937	8.19486e-22	9.00637e-21			RGR	6.28641	2.44552	-1.3621	9.83695e-23	1.41866e-21
CIITA	0.392557	1.89683	2.27262	1.45876e-52	1.12884e-50			CAPSL	0.120105	1.15841	3.26978	0.00023754	0.000415335
JAML	0.141604	0.301348	1.08957	1.10685e-12	5.32364e-12			ST8SIA3	6.61768	2.92271	-1.17902	1.25904e-21	1.61854e-20
CCBE1	0.217489	0.107239	-1.0201	2.98808e-12	1.38219e-11			IQUB	0.137644	0.278264	1.01552	2.21451e-10	8.1911e-10
FRMPD2B	0.605827	0.165658	-1.87069	9.42154e-14	5.0418e-13			HERC5	1.52081	3.82512	1.33067	1.31087e-37	7.04598e-36
ECHDC3	0.586352	1.28896	1.13637	8e-21	8.1574e-20			RIBC1	0.774061	1.6459	1.08835	1.49966e-10	5.65973e-10
AC092720.2	1.32996	0.543879	-1.29003	1.05952e-26	1.76947e-25			HLA-B	108.769	267.103	1.29613	2.65503e-45	2.63702e-43
PLEK	2.11737	7.70288	1.86313	9.66279e-70	3.21089e-67			NRROS	1.89051	3.83326	1.0198	6.81156e-35	2.98663e-33
TMEM271	6.15747	2.62942	-1.22759	7.36349e-25	1.05374e-23			AL357992.1	0.288091	1.05834	1.87721	7.46488e-26	1.45254e-24
GRIN1	23.5573	6.05808	-1.95924	1.27093e-27	2.2684e-26			RIBC2	0.178004	0.634392	1.83346	5.74424e-09	1.79069e-08
RIMKLA	2.18529	1.06228	-1.04066	2.27122e-22	2.62912e-21			AC245128.3	0.218174	0.654561	1.58505	1.3029e-18	1.23808e-17
TYMP	1.3488	7.77925	2.52795	1.00224e-51	7.40087e-50			ITGAM	1.77292	4.60081	1.37576	1.11513e-48	1.56282e-46
PCDHGA12	4.45484	1.87517	-1.24836	0.000638387	0.00113199			MIR4435-2HG	0.325922	0.902194	1.46891	1.32332e-13	7.04329e-13
AC015712.7	0.446797	0.115497	-1.95177	1.1214e-14	6.57137e-14			AP002761.4	0.0954588	0.267499	1.48658	2.4783e-10	9.11368e-10
SAA2	0.0193944	0.367915	4.24566	0.035298	0.0475522			LRTM2	2.88156	1.33556	-1.10941	7.46886e-13	3.64414e-12
TCEA3	0.799292	1.85994	1.21846	1.65563e-06	4.10115e-06			PLEKHS1	0.07779	0.297078	1.93319	1.09206e-15	7.34814e-15
AF106564.1	1.40699	0.604587	-1.21859	7.45227e-26	1.16132e-24			TLR7	1.00706	3.2844	1.70549	1.34078e-48	1.85629e-46
DGKK	1.52291	0.410072	-1.89288	4.58583e-20	4.36852e-19			P2RY2	0.0779215	0.209804	1.42895	5.30665e-10	1.87134e-09
HSPB6	8.92813	19.2951	1.11181	1.33077e-10	5.18985e-10			AL355974.2	4.86875	11.3669	1.22322	1.64232e-12	7.69268e-12
CD79A	0.162932	0.328236	1.01046	4.59795e-20	4.37823e-19			SPATA18	0.200143	0.799305	1.99771	6.72183e-05	0.000126632
NCKAP1L	1.47056	4.97805	1.75921	8.22697e-75	7.14987e-72			BANK1	0.0793119	0.210152	1.40582	7.04217e-11	2.75418e-10
RNF144A-AS1	0.532341	0.164282	-1.69617	9.52868e-11	3.77472e-10			TNFRSF1B	5.80774	14.4344	1.31347	1.0901e-54	4.60898e-52
STRCP1	0.195413	0.0759622	-1.36317	7.39932e-30	1.5788e-28			SULF1	2.79	7.67152	1.45925	1.67431e-13	8.79869e-13
CORO6	3.5071	1.34677	-1.38078	1.37464e-21	1.47982e-20			LINC01995	0.0702195	0.155517	1.14713	3.47574e-06	7.72597e-06
RN7SL138P	0.772653	1.89427	1.29375	3.53367e-48	2.28134e-46			CFAP161	0.0754758	0.330093	2.12879	0.00112062	0.00179078
ZFP36	25.9815	65.8999	1.34279	1.82495e-27	3.21407e-26			AGR3	0.0336754	0.294778	3.12986	4.36629e-09	1.38034e-08
AC010624.1	0.268986	0.558989	1.05529	9.30392e-07	2.37469e-06			AC013470.2	0.0215516	0.295101	3.77534	9.91453e-07	2.35556e-06
CAPS	4.18259	8.81578	1.07569	6.0258e-09	1.97877e-08			CTHRC1	0.899593	2.42804	1.43245	2.13385e-09	7.0067e-09
VENTX	0.18168	0.737461	2.02117	2.97272e-42	1.4763e-40			LY75	0.179619	0.401714	1.16123	1.15369e-45	1.20342e-43
RN7SL75P	0.299234	0.148956	-1.00639	3.35984e-10	1.25756e-09			LYN	2.40959	6.19802	1.36302	5.35243e-62	2.49226e-58
AL022329.1	0.137825	0.0656602	-1.06974	4.68419e-10	1.72835e-09			AC011899.2	0.144942	0.501162	1.7898	4.14244e-46	4.50618e-44
HAMP	0.460972	3.04495	2.72367	1.84161e-38	7.5798e-37			GAS6-AS1	0.140068	0.30771	1.13545	6.9007e-24	1.11092e-22
SV2C	0.757267	0.344198	-1.13756	1.07263e-09	3.80192e-09			IFNLR1	0.456907	1.15018	1.33188	2.65034e-27	5.97674e-26
IL2RA	0.0562358	0.287929	2.35615	2.67604e-15	1.66992e-14			LYL1	1.60831	3.22277	1.00275	6.50406e-32	2.22757e-30
PDLIM1	2.32734	5.7509	1.3051	8.27041e-12	3.65925e-11			GZMK	0.0556683	0.365272	2.71404	7.4847e-33	2.77116e-31
AC138207.4	0.310381	0.633916	1.03025	1.591e-32	4.32614e-31			FPR2	0.0407938	0.18743	2.19993	2.93095e-29	7.85852e-28
CACNA2D3	3.27164	1.35312	-1.27372	3.60541e-20	3.4623e-19			SRRM4	2.77675	1.16495	-1.25313	1.06565e-19	1.12183e-18
KRTAP5-AS1	0.536147	0.192837	-1.47525	2.43305e-16	1.66901e-15			JCHAIN	0.193213	2.14182	3.47058	8.88677e-15	5.39501e-14
CABP1	6.31027	1.86214	-1.76074	2.9636e-27	5.14723e-26			IGHG2	0.554161	4.99294	3.17151	2.9348e-12	1.34192e-11
AC009878.1	0.801291	0.373357	-1.10177	1.29933e-24	1.81569e-23			PCDH20	0.149457	0.062081	-1.26751	2.9469e-19	2.96429e-18
TMEM272	0.303315	0.133036	-1.189	1.02915e-15	6.68432e-15			SLC44A3	2.1047	4.28375	1.02526	1.13609e-24	1.98113e-23
SP100	0.697718	1.9403	1.47556	3.04967e-61	3.91536e-59			C20orf197	0.0995751	0.22038	1.14614	2.45288e-30	7.23016e-29
CYGB	2.67853	1.29299	-1.05073	1.39568e-16	9.80009e-16			TCF24	0.0664156	0.137668	1.0516	4.86489e-11	1.9368e-10
S1PR3	2.55173	6.87229	1.42932	2.99112e-32	7.91421e-31			AC244502.1	0.321136	0.112522	-1.51297	0.00820856	0.0115909
COL4A6	0.345976	0.757393	1.13037	3.06994e-18	2.48632e-17			LRRC61	0.84355	1.72198	1.02953	5.34347e-06	1.16143e-05
AL583859.2	0.81352	0.208487	-1.96422	9.9447e-11	3.93263e-10			FAM181A	1.80096	5.27223	1.54965	3.13675e-21	3.84833e-20
CHRM4	2.64808	1.19687	-1.14567	4.0421e-23	4.98011e-22			TRIM67	10.6145	2.59787	-2.03064	3.6222e-18	3.26799e-17
LCP2	1.42712	3.81479	1.4185	2.03437e-59	2.15815e-57			CD180	0.381515	1.22822	1.68676	4.68091e-46	5.0678e-44
BHLHA9	0.170746	0.0461748	-1.88667	7.07757e-13	3.46008e-12			TRHDE	0.548241	0.252466	-1.11872	8.56687e-10	2.95002e-09
APOL4	1.23784	4.07615	1.71938	7.85636e-36	2.72273e-34			TAGLN2	19.7474	55.5582	1.49234	8.32773e-31	2.56041e-29
GALNT5	0.0417296	0.193709	2.21475	0.00171221	0.00285024			IDO1	0.0356021	0.42915	3.59145	2.74377e-23	4.16193e-22
GPR150	0.328844	0.138548	-1.24701	1.04117e-08	3.32668e-08			IL1R1	0.839174	2.6399	1.65344	1.21506e-23	1.92355e-22
SH2D2A	0.0945012	0.249503	1.40065	2.42166e-24	3.31234e-23			COL6A3	0.144672	1.08158	2.90228	6.01514e-23	8.87088e-22
OGDHL	4.87129	2.09523	-1.21719	6.52566e-18	5.14494e-17			CD3D	0.125379	0.690008	2.46032	1.39397e-34	5.97444e-33
SLC30A3	2.94153	0.77722	-1.92017	6.96576e-16	4.59155e-15			SAMSN1	1.90094	5.41571	1.51044	1.68829e-45	1.72176e-43
IKZF1	0.583996	1.87675	1.68421	2.54788e-68	6.93637e-66			CASP4	0.468594	1.42633	1.6059	3.66689e-60	6.44356e-57
SFN	0.414939	0.866819	1.06283	1.76589e-09	6.13314e-09			ABCC8	9.3417	3.37164	-1.47024	3.72629e-29	9.88656e-28
THSD4	1.8607	0.861484	-1.11095	1.65632e-21	1.76788e-20			SLC7A7	1.53232	3.99688	1.38316	1.28766e-51	2.94152e-49
PCSK2	8.84596	2.6128	-1.75942	5.60739e-37	2.09084e-35			FCGR2A	1.80596	6.67409	1.88581	1.12068e-61	4.26681e-58
FOS	49.5636	102.286	1.04526	2.4562e-16	1.68438e-15			IL2RB	0.0972324	0.429571	2.14339	2.85259e-32	1.00253e-30
RTP4	1.66261	3.43404	1.04646	5.6977e-28	1.05012e-26			GLYATL1P2	0.27499	0.12043	-1.19119	3.13547e-17	2.51498e-16
RNY4P19	0.541794	0.246522	-1.13603	8.67184e-17	6.19699e-16			FXYD7	13.3277	6.47714	-1.041	1.86024e-11	7.77591e-11
MCUB	1.20361	3.09734	1.36366	3.04018e-26	4.8686e-25			HTR5A	1.07174	0.449673	-1.25301	2.80371e-11	1.14987e-10
MGAT5B	7.56542	3.26823	-1.21091	9.4844e-26	1.46386e-24			TMEM154	0.128838	0.320296	1.31384	6.00794e-41	4.07256e-39
GUCY1A1	5.0597	2.48977	-1.02304	5.58522e-19	4.81693e-18			DRAIC	1.14126	0.544333	-1.06807	1.11984e-22	1.60891e-21
ANO4	1.87365	0.916027	-1.03239	1.00488e-21	1.09798e-20			VAMP5	18.8265	39.1576	1.05653	2.68244e-40	1.76593e-38
TNNT1	2.69498	1.00938	-1.4168	1.05718e-32	2.89903e-31			IGHV3-30	0.202874	0.731816	1.8509	2.20317e-10	8.15181e-10
CHRNA2	0.484418	0.159186	-1.60554	9.72013e-13	4.69207e-12			RHOD	0.308283	1.02715	1.73632	1.4341e-08	4.26681e-08
ACP5	0.821572	1.73514	1.0786	2.97595e-11	1.24481e-10			ABI3	3.35283	9.06823	1.43544	1.47206e-44	1.38386e-42
AP000894.2	0.160907	0.0635027	-1.34134	1.86322e-07	5.15821e-07			BIN2	1.50474	3.48028	1.20969	3.63059e-44	3.29116e-42
CYP2S1	0.296823	0.732901	1.30402	9.50936e-49	6.21022e-47			LHX3	0.360627	0.140876	-1.35608	1.68441e-14	9.9789e-14
AL139125.1	0.293495	0.591221	1.01036	2.98808e-23	3.72414e-22			AP003071.4	0.0976986	0.288085	1.56008	2.06593e-20	2.34098e-19
AC083867.1	1.14608	0.56112	-1.03032	6.96211e-14	3.77371e-13			ABCC3	0.248557	2.1769	3.13063	1.99726e-28	5.01379e-27
AL049777.1	0.634639	0.306121	-1.05183	4.10845e-18	3.28967e-17			HLA-DOA	1.73588	9.99039	2.52487	2.88171e-58	3.46473e-55
SRGN	28.9593	66.5122	1.19959	4.7784e-42	2.33707e-40			PVALB	3.67714	1.53664	-1.2588	7.41895e-10	2.5741e-09
SQOR	1.12589	2.99393	1.41098	1.19625e-64	2.16243e-62			CCK	13.3261	6.44523	-1.04795	4.03325e-07	1.00882e-06
GRM5	1.23119	0.405961	-1.60065	4.7531e-23	5.7992e-22			CAMKV	13.9855	6.87082	-1.02538	1.73399e-10	6.49367e-10
AC092611.2	0.136519	0.063937	-1.09438	0.0043696	0.00683149			AC018755.4	0.949099	2.29665	1.2749	3.41446e-24	5.68099e-23
PCED1B	0.702461	2.05343	1.54755	5.87422e-63	8.90832e-61			WDR45P1	0.181568	0.692611	1.93153	3.88974e-38	2.14114e-36
ZC3H12D	0.148294	0.327649	1.14369	2.86838e-37	1.09298e-35			SYN1	47.9683	22.9782	-1.06181	6.01127e-21	7.15961e-20
ZBP1	0.0614798	0.26304	2.0971	1.70406e-27	3.01527e-26			ZBED6CL	0.246921	0.581773	1.2364	1.73397e-11	7.26937e-11
AL354824.1	0.30328	0.124379	-1.28591	1.76796e-16	1.22505e-15			IGFBP3	9.64013	20.3339	1.07676	8.27028e-05	0.000153949
BLNK	0.954496	2.91736	1.61185	5.62129e-54	4.65269e-52			AL096711.1	0.164024	0.0798316	-1.03888	1.7305e-21	2.19498e-20
NAMPT	5.53673	12.1409	1.13277	8.31333e-16	5.44171e-15			STAC	0.351637	0.822671	1.22623	1.00021e-06	2.37442e-06
FCER1G	11.8549	43.5687	1.87781	8.95144e-78	2.5267e-74			PNMA6F	1.27954	0.567617	-1.17263	2.65374e-07	6.80228e-07
CASS4	0.424599	0.881365	1.05364	3.4548e-35	1.14464e-33			DDIT4L	0.468205	2.80975	2.58523	7.74208e-20	8.27997e-19
ABLIM2	4.12061	1.79303	-1.20046	2.64353e-24	3.60273e-23			CYBA	6.03105	16.0451	1.41165	1.42721e-50	2.71694e-48
POLR2CP1	0.075455	0.159492	1.07979	2.03479e-21	2.15859e-20			NCF2	1.93242	4.47469	1.21138	3.06256e-43	2.60078e-41
AC018410.1	0.787116	0.335819	-1.22889	3.16238e-13	1.60182e-12			AC119044.1	0.199155	0.568518	1.51332	6.83667e-41	4.60699e-39
CASP1	1.12192	3.94371	1.81358	1.2838e-71	5.68797e-69			HOXA1	0.0669682	0.27726	2.04969	1.78707e-30	5.34343e-29
CFAP100	0.126304	0.619528	2.29427	0.0161734	0.0231417			ALOX5AP	4.48485	17.9339	1.99956	1.23626e-56	8.06892e-54
AC146944.2	0.0663715	0.170632	1.36225	1.67162e-35	5.67147e-34			CPLX2	45.1904	18.32	-1.3026	4.19332e-22	5.685e-21
XKR7	2.40578	0.689367	-1.80316	1.72605e-28	3.33064e-27			FERMT3	3.4098	8.66502	1.34551	1.66669e-48	2.2936e-46
IGHV1-18	0.0886256	1.24343	3.81045	1.93685e-07	5.35616e-07			CHGB	43.5694	16.8555	-1.37009	6.18465e-29	1.61281e-27
AL731567.1	0.179093	0.482731	1.43051	2.12015e-31	5.19034e-30			MAST1	10.8561	5.38576	-1.01128	2.30382e-37	1.20985e-35
ZDHHC22	51.6473	25.7548	-1.00385	3.11436e-27	5.39249e-26			SMIM25	0.0985109	0.292795	1.57154	3.69268e-26	7.4717e-25
MMP9	0.838386	3.13529	1.90291	3.10708e-08	9.39986e-08			KCNC2	2.83478	1.23755	-1.19575	8.01393e-14	4.39123e-13
PRKCG	9.47038	2.49792	-1.92269	1.43401e-10	5.5694e-10			AL132711.1	0.078303	0.311536	1.99226	2.05457e-14	1.20438e-13
C1QA	40.8376	163.451	2.00088	2.33356e-74	1.70094e-71			AC010255.1	0.0389628	0.293724	2.91429	6.03372e-17	4.65657e-16
FAM20A	0.340486	0.826134	1.27878	4.76403e-21	4.92443e-20			CD8B	0.0490537	0.183652	1.90454	1.15302e-25	2.20969e-24
EVI2B	2.96673	10.1172	1.76987	3.38288e-67	8.2193e-65			CHI3L1	8.61125	198.066	4.52361	1.30073e-24	2.25447e-23
HLA-DRB6	2.62505	13.4569	2.35793	1.72849e-35	5.85563e-34			RASEF	0.110815	0.30672	1.46877	2.89758e-18	2.653e-17
ARHGAP30	1.88052	5.19153	1.46503	1.46259e-72	7.68573e-70			FGFBP2	0.695949	1.71333	1.29975	1.62379e-20	1.86589e-19
CORO2A	0.515131	0.251787	-1.03273	1.31974e-08	4.16435e-08			PI16	8.39393	18.5413	1.14333	1.10972e-16	8.34168e-16
C11orf45	0.274667	0.635476	1.21015	1.2459e-46	7.56782e-45			COL5A1	0.906296	2.03393	1.16622	8.45935e-13	4.10113e-12
TENM2	1.58486	0.62917	-1.33283	9.80097e-20	9.0356e-19			PSD	25.6789	12.6481	-1.02166	1.64215e-26	3.41962e-25
TGFB2-AS1	1.71624	3.98846	1.21658	4.31522e-18	3.4479e-17			AL356479.1	1.0282	0.48635	-1.08006	3.52227e-06	7.82331e-06
ACAN	1.45472	0.639286	-1.18621	1.38718e-13	7.29453e-13			HK3	0.355784	0.989609	1.47586	1.88882e-21	2.38783e-20
AL596330.1	0.13237	0.687048	2.37583	3.84788e-06	9.12922e-06			NUAK2	0.585795	1.28076	1.12854	3.00583e-24	5.0341e-23
MS4A4E	0.126181	0.407249	1.69041	2.35694e-23	2.96039e-22			LRGUK	0.165471	0.354403	1.09881	4.69965e-13	2.34716e-12
TRAF3IP3	0.17507	0.540778	1.6271	1.81812e-60	2.1397e-58			CD84	1.17776	3.28362	1.47924	2.81278e-44	2.5702e-42
SOD2	10.7116	30.9495	1.53074	8.20741e-26	1.2746e-24			ITGB2-AS1	0.367517	0.788003	1.10039	8.50857e-20	9.04466e-19
OTOG	0.539931	0.161043	-1.74533	2.10425e-12	9.87491e-12			AC009654.1	0.158368	0.431575	1.44633	1.27526e-16	9.53896e-16
GLP1R	0.851689	0.392972	-1.1159	7.06142e-10	2.55746e-09			CD68	0.327905	0.675095	1.04181	2.87307e-27	6.45989e-26
METTL7B	8.30254	22.4364	1.43421	1.95727e-23	2.48045e-22			TIMD4	0.0715133	0.303243	2.08419	1.40061e-27	3.26152e-26
APOC2	0.429193	1.27548	1.57134	4.61071e-38	1.8571e-36			PDLIM4	1.40061	5.26489	1.91035	5.49642e-09	1.71554e-08
CSF2RA	2.49473	7.24745	1.53859	2.27649e-61	2.97339e-59			SOCS1	0.578757	1.37802	1.25157	1.10025e-13	5.91531e-13
CD70	0.105595	0.267847	1.34287	3.04938e-05	6.48201e-05			LINC01842	0.0790529	0.252788	1.67704	9.75401e-11	3.76323e-10
CD1C	0.0502975	0.189373	1.91267	5.59947e-23	6.80978e-22			CLEC4GP1	0.815773	0.359789	-1.18102	6.57803e-14	3.64111e-13
SYT2	0.850617	0.277303	-1.61705	3.44522e-18	2.77831e-17			MYT1L	3.78189	1.46729	-1.36595	1.76682e-19	1.81317e-18
VSIG4	11.9164	45.8605	1.94431	1.04885e-61	1.41071e-59			BLK	0.178663	0.0436577	-2.03293	2.47594e-12	1.13895e-11
VN1R85P	1.02403	0.408902	-1.32444	6.67847e-12	2.9853e-11			ADAMTS15	1.40536	3.47532	1.30621	1.87963e-12	8.76827e-12
ARHGAP25	1.18581	2.91302	1.29664	1.36089e-62	1.9712e-60			PIPOX	4.31513	9.09215	1.07522	3.96351e-15	2.50463e-14
DENND1C	0.603235	1.52999	1.34273	7.02411e-67	1.6533e-64			CYP1B1	1.02904	3.10522	1.59339	3.53165e-13	1.79681e-12
AC067969.1	0.427299	0.202779	-1.07534	2.51644e-07	6.88145e-07			GBP6	0.0625995	0.146306	1.22477	1.28356e-10	4.88856e-10
LHX5-AS1	5.69955	2.06148	-1.46717	2.28942e-15	1.43979e-14			DGCR9	3.77232	1.84969	-1.02817	5.96886e-30	1.69804e-28
LINC01736	5.09368	15.8481	1.63753	4.04188e-40	1.80852e-38			STYK1	0.875483	0.36105	-1.27788	1.70799e-10	6.40048e-10
APOBEC3F	0.266601	0.629981	1.24063	1.27556e-39	5.59661e-38			AC004233.1	0.423676	0.208339	-1.02403	3.75433e-24	6.2013e-23
RTBDN	0.780396	0.315472	-1.3067	9.15173e-21	9.27321e-20			AL031593.1	0.365659	0.0795459	-2.20064	5.3564e-13	2.6583e-12
MS4A14	0.298009	0.815279	1.45194	1.56229e-40	7.16056e-39			AL022313.4	12.3278	4.46433	-1.4654	2.46813e-29	6.64881e-28
ALDH3A1	0.088303	0.334736	1.92249	5.43734e-05	0.000111723			EFEMP1	23.6141	54.1625	1.19764	1.47626e-21	1.8819e-20
AC103808.6	0.189968	0.0900271	-1.07733	0.00741519	0.0112054			FPR1	2.79285	11.959	2.09828	5.56396e-51	1.15548e-48
LINC00475	0.22133	0.577489	1.38359	3.35412e-06	8.02516e-06			Z82196.1	0.308651	0.102911	-1.58458	2.00329e-18	1.86484e-17
PTPN22	0.0518461	0.195017	1.91129	6.43831e-23	7.80054e-22			BATF3	0.828387	1.92472	1.21627	1.62906e-23	2.54022e-22
AC004816.1	1.71736	0.827556	-1.05326	2.39877e-16	1.6465e-15			P2RY13	3.55833	7.39199	1.05476	1.78004e-27	4.09498e-26
AL137786.1	0.399679	0.140284	-1.51049	1.36841e-08	4.30691e-08			DHRS9	1.39302	2.79982	1.00712	5.27388e-11	2.09015e-10
LST1	3.22687	9.04414	1.48685	4.72777e-69	1.42438e-66			NGFR	3.66413	8.91738	1.28315	1.20966e-06	2.84589e-06
APOBEC3D	0.150338	0.337871	1.16826	1.68819e-25	2.54989e-24			EFHC2	0.489691	1.32575	1.43687	7.5745e-05	0.000141632
AC093802.1	0.270371	0.0948637	-1.51101	1.1947e-20	1.19874e-19			RGS16	3.17429	7.0758	1.15646	7.54363e-22	9.96684e-21
C10orf55	0.0517384	0.152858	1.56288	2.21941e-22	2.57575e-21			APOBEC3C	2.43601	7.09853	1.543	4.88486e-52	1.19989e-49
MSLN	0.324054	1.00219	1.62886	2.2705e-18	1.86222e-17			ITIH2	0.786024	1.71255	1.1235	3.29926e-07	8.34088e-07
GVINP1	0.0964026	0.21465	1.15484	8.03839e-29	1.59469e-27			CEBPE	0.0672864	0.13693	1.02506	3.66346e-22	4.99631e-21
SLC17A6	1.15571	0.343222	-1.75156	1.22234e-24	1.71659e-23			CYCSP8	0.219764	0.0862371	-1.34957	7.28755e-18	6.3179e-17
TNF	1.14715	3.51159	1.61407	1.19385e-13	6.32204e-13			IGLV1-40	0.155537	1.7833	3.51922	1.10764e-09	3.75639e-09
ADGRF5P1	0.897257	0.41917	-1.09799	7.69739e-25	1.09943e-23			S100A4	1.85846	8.70452	2.22766	1.44756e-45	1.48288e-43
HPCA	26.635	8.89659	-1.582	9.38438e-17	6.68715e-16			MMD2	21.7049	10.307	-1.0744	3.82724e-18	3.4394e-17
RBFOX3	3.55393	0.9436	-1.91317	1.10964e-26	1.85043e-25			IGF2BP3	0.164992	0.374985	1.18443	3.90815e-08	1.10629e-07
RBM47	0.449259	1.36818	1.60664	8.56226e-70	2.88765e-67			MICB	0.501867	1.08538	1.11283	1.16634e-30	3.53366e-29
DSC2	0.204699	0.420676	1.0392	2.18594e-27	3.83192e-26			PRND	0.0431127	0.318232	2.88389	0.00014674	0.00026453
AC106738.1	0.0775563	0.155359	1.00229	1.41504e-09	4.95724e-09			AC243964.2	0.225727	0.452971	1.00484	0.000141144	0.000255108
APOL6	2.15237	4.35645	1.01723	1.24323e-25	1.89682e-24			ITGB7	0.0809164	0.204666	1.33877	2.18981e-31	7.18735e-30
PNLDC1	0.35305	0.164087	-1.10541	6.87895e-09	2.24393e-08			AL161618.1	0.0197964	0.1907	3.26799	0.000990338	0.00159375
AC002398.2	0.0666902	0.147899	1.14907	4.24684e-09	1.41871e-08			LINC01586	0.223135	0.0943035	-1.24253	2.60207e-23	3.95487e-22
FADS6	0.550445	0.11816	-2.21986	3.30154e-14	1.85207e-13			PNMA5	1.11432	0.542249	-1.03913	2.85973e-13	1.46771e-12
CD226	0.086699	0.208834	1.26827	2.64196e-40	1.19396e-38			LOR	0.186196	0.0716183	-1.37842	1.12975e-14	6.79338e-14
ALOX15B	0.767926	2.53104	1.72069	3.63662e-10	1.35599e-09			ITGB3	0.101419	0.348862	1.78233	1.21355e-34	5.22077e-33
AK5	12.4619	5.03026	-1.30881	8.46402e-08	2.44194e-07			CLEC18B	0.323647	0.832833	1.36361	4.11388e-17	3.24957e-16
Z82196.2	0.184021	0.0406174	-2.1797	6.04852e-24	7.98787e-23			ICAM1	1.60226	5.79067	1.85362	1.27441e-44	1.203e-42
ACVR1C	0.781682	0.330685	-1.24112	1.26282e-20	1.26483e-19			LINC02440	4.24471	1.75406	-1.27497	5.48905e-25	9.90456e-24
CARTPT	2.63406	0.345596	-2.93013	2.06828e-06	5.06391e-06			MAP1LC3C	0.330544	0.994089	1.58853	1.84474e-09	6.10124e-09
LPAR6	2.57819	5.97033	1.21145	2.07325e-49	1.39012e-47			TREML1	0.737096	1.57972	1.09974	1.27232e-23	2.00447e-22
FAM19A2	2.50377	0.736991	-1.76438	4.71748e-35	1.55162e-33			TLX1NB	0.689	0.266658	-1.36951	4.29832e-12	1.93175e-11
LINC00364	0.0954106	0.218919	1.19818	4.06595e-10	1.50886e-09			OTOS	0.824371	3.14806	1.9331	5.39254e-12	2.39711e-11
AL162426.1	0.633587	0.295826	-1.09879	2.2966e-30	5.08265e-29			TCTEX1D1	0.270154	2.72492	3.33436	4.66044e-13	2.33012e-12
SYTL3	0.916401	1.98516	1.1152	1.02065e-31	2.56822e-30			CD44	11.7809	36.3321	1.62479	1.74888e-42	1.3824e-40
ZFR2	2.08652	0.628512	-1.73109	1.14282e-27	2.04784e-26			ARHGAP18	1.59617	3.47533	1.12254	2.14552e-32	7.65816e-31
HTR5A-AS1	0.897263	0.188839	-2.24837	1.15615e-14	6.76624e-14			KCNMB1	0.678134	1.53803	1.18145	1.47962e-25	2.81201e-24
BLACAT1	0.799013	0.355971	-1.16646	1.71395e-26	2.80844e-25			LINC01933	0.164636	0.0793681	-1.05265	2.10533e-17	1.72381e-16
ANXA1	6.22337	29.4047	2.24028	2.04857e-28	3.92284e-27			AC027281.1	0.24	0.869783	1.85762	3.88977e-05	7.54787e-05
HAR1A	2.10611	0.832953	-1.33827	4.01482e-27	6.8883e-26			FUOM	1.68513	3.47868	1.04568	7.9357e-33	2.92865e-31
AL133415.1	0.155579	0.476534	1.61493	7.2863e-28	1.3203e-26			ENPEP	0.431314	0.876313	1.02271	4.37955e-10	1.55957e-09
AL162311.1	0.249719	0.122133	-1.03186	2.68756e-13	1.37146e-12			RN7SL834P	0.0605756	0.167348	1.46604	5.32129e-19	5.24868e-18
AC008083.2	0.118736	0.293482	1.30552	2.99586e-28	5.65061e-27			AC002480.2	0.0965225	0.228451	1.24295	9.33291e-19	9.00723e-18
HMOX1	9.4028	28.0471	1.57669	2.04984e-62	2.89489e-60			TNNT2	0.45695	0.162653	-1.49024	1.41171e-07	3.73426e-07
SCIMP	0.397837	1.33069	1.74192	4.30284e-62	5.96484e-60			SERPINB1	3.36576	7.97044	1.24373	2.4461e-54	9.47098e-52
TLR3	0.751308	1.77038	1.23659	1.27398e-43	6.82152e-42			KCNJ11	12.3293	4.97847	-1.30831	1.65046e-22	2.33456e-21
NPTX1	17.2008	5.83995	-1.55845	2.74117e-15	1.70868e-14			SIX6	0.157692	0.423904	1.42662	5.61492e-05	0.000106863
HTR1B	0.349576	0.155592	-1.16784	9.40812e-11	3.73023e-10			MAP7D2	4.49738	2.2314	-1.01114	0.000151896	0.000273285
HECW1	1.82884	0.679994	-1.42734	9.60849e-33	2.63807e-31			CCL3	10.2116	25.086	1.29667	9.68782e-08	2.60731e-07
ADAM11	5.63811	1.94924	-1.5323	1.52933e-23	1.95568e-22			PDGFD	0.713955	1.71366	1.26317	1.22951e-12	5.84902e-12
RNA5SP498	0.327098	0.818627	1.32348	4.35266e-23	5.33077e-22			TMEM130	19.7626	9.45578	-1.0635	2.59517e-10	9.52047e-10
HLA-DMA	6.36086	25.1628	1.984	3.66796e-70	1.35871e-67			IGHV4-39	0.0831587	1.52688	4.19858	6.82814e-10	2.37995e-09
VIM-AS1	0.167098	0.356579	1.09353	5.42183e-32	1.40174e-30			SLC16A5	0.200653	0.47343	1.23845	3.07822e-47	3.72057e-45
CCDC89	0.575585	1.21686	1.08006	1.94204e-12	9.15934e-12			IL1R2	0.112043	0.229124	1.03208	3.10138e-09	9.9814e-09
CEBPA	3.06627	8.61116	1.48973	7.57707e-57	7.16366e-55			AC122707.1	3.28055	1.26323	-1.37682	1.20916e-21	1.55617e-20
SYT16	2.62861	0.855951	-1.6187	1.87008e-29	3.9054e-28			AC010255.2	0.133332	0.496407	1.8965	2.48774e-17	2.02098e-16
RPE65	3.35899	7.77341	1.21052	4.4083e-22	4.95572e-21			AL035696.3	0.185688	0.0888408	-1.06359	2.68637e-08	7.76607e-08
AL359399.1	0.689571	0.311438	-1.14675	7.72871e-15	4.60184e-14			MFAP4	6.52568	13.9133	1.09226	4.23533e-17	3.33858e-16
SPATA17	0.21569	0.585365	1.44037	4.9453e-17	3.6093e-16			AC005544.1	0.805131	0.335535	-1.26276	2.37126e-20	2.66056e-19
SIGLEC10	3.20379	9.52455	1.57187	1.25491e-59	1.36327e-57			AC008761.3	0.341653	0.145693	-1.2296	3.94912e-24	6.51363e-23
HHEX	1.11494	2.40737	1.1105	2.41346e-49	1.61345e-47			CD248	2.23612	4.77363	1.09409	7.93564e-16	5.42598e-15
HTR2A	2.70758	1.00826	-1.42514	6.44834e-21	6.62002e-20			ELF4	0.617327	1.70915	1.46917	2.17761e-52	5.71786e-50
AC103564.3	0.41995	0.182651	-1.20113	1.64107e-11	7.06047e-11			KDELR3	0.511541	1.1798	1.20562	6.72314e-18	5.8508e-17
U62317.1	0.0543304	0.201573	1.89147	6.78668e-28	1.23771e-26			FCGR3A	6.82813	34.002	2.31606	3.76279e-53	1.10202e-50
AL117372.1	0.189213	0.0383966	-2.30096	2.39612e-12	1.11865e-11			GLIS3	1.85623	4.29831	1.2114	3.03191e-32	1.05742e-30
LPO	0.353724	0.0959372	-1.88246	5.1198e-28	9.49031e-27			MNX1-AS1	0.513645	0.191264	-1.42521	4.29437e-06	9.44e-06
IGHV4-34	0.0505083	0.77612	3.94169	1.53725e-10	5.95607e-10			ACTN1	5.40678	13.3967	1.30903	2.39945e-19	2.43181e-18
MYZAP	0.257826	0.558449	1.11503	3.31315e-06	7.93217e-06			HORMAD2-AS1	0.0812802	0.210391	1.3721	3.72591e-06	8.25396e-06
BASP1-AS1	0.67259	0.22285	-1.59366	2.23423e-34	6.96348e-33			AOAH	2.00836	4.67387	1.2186	5.39641e-41	3.67987e-39
MARCO	0.28504	1.3333	2.22576	0.00939672	0.0139647			SOWAHB	0.711675	0.280766	-1.34185	2.15483e-05	4.32747e-05
MS4A4A	2.05464	6.98983	1.76637	1.46998e-53	1.19481e-51			AC125807.2	0.329416	0.789444	1.26093	1.72529e-23	2.67566e-22
DLEU7-AS1	0.175522	0.413119	1.23491	1.11372e-31	2.79307e-30			APOL1	2.00092	6.2958	1.65372	1.58204e-44	1.48115e-42
RGR	6.17286	2.5595	-1.27008	8.48834e-18	6.63677e-17			ISG15	27.5537	80.8624	1.55322	2.96395e-18	2.70618e-17
CAPSL	0.161634	1.11672	2.78847	0.0323642	0.0438963			APOH	0.0723028	0.187819	1.37722	4.65917e-07	1.15501e-06
ST8SIA3	7.07128	2.46739	-1.51898	7.30404e-30	1.55994e-28			CD79B	0.103579	0.268232	1.37275	7.21664e-27	1.56411e-25
ELOVL4	5.28043	2.62276	-1.00957	6.64268e-39	2.80557e-37			LRRC18	0.0378941	0.176776	2.22187	3.51341e-07	8.86366e-07
AC110079.2	0.247398	0.120049	-1.04322	3.16388e-19	2.78935e-18			ALPK1	0.352348	0.817287	1.21384	8.47989e-41	5.69749e-39
HERC5	1.67368	3.67167	1.13341	6.78302e-31	1.58336e-29			ITGA5	1.75748	4.41541	1.32904	2.46387e-41	1.74256e-39
RIBC1	0.773339	1.64662	1.09034	1.10163e-14	6.45886e-14			LINC01476	0.395146	0.157774	-1.32453	3.03626e-05	5.97779e-05
HLA-B	111.066	264.797	1.25347	2.32852e-39	1.00411e-37			C16orf92	0.557987	0.271041	-1.04172	1.00946e-24	1.77113e-23
NRROS	1.60518	4.11968	1.3598	7.4571e-54	6.10509e-52			SIGLEC8	5.07973	11.0171	1.11692	2.16693e-24	3.66949e-23
AL357992.1	0.292121	1.05429	1.85164	2.72408e-26	4.39353e-25			IGHGP	0.0921816	0.531668	2.52798	1.47645e-10	5.58133e-10
RIBC2	0.21249	0.599776	1.49703	2.00678e-05	4.36733e-05			SLC17A8	3.43011	0.69088	-2.31175	2.50994e-12	1.15345e-11
AC245128.3	0.202697	0.670097	1.72504	1.03917e-23	1.34363e-22			SH2D4A	0.170289	0.795498	2.22388	7.58126e-20	8.11558e-19
ITGAM	1.56731	4.8072	1.61691	4.33011e-66	9.14422e-64			AL133330.1	0.0914149	0.241995	1.40448	6.34397e-16	4.38332e-15
MIR4435-2HG	0.395852	0.831999	1.07162	1.13437e-05	2.55174e-05			IRF7	3.30954	7.03263	1.08743	2.90808e-25	5.35311e-24
OXER1	0.356146	0.773824	1.11954	1.10916e-36	4.06859e-35			HOXA3	0.161886	0.414535	1.35652	1.60321e-08	4.75262e-08
LRTM2	3.14208	1.07405	-1.54866	1.89493e-17	1.43925e-16			GZMH	0.173202	0.585154	1.75636	5.54345e-22	7.42725e-21
PLEKHS1	0.0661927	0.308719	2.22155	2.07183e-14	1.18279e-13			CD52	0.821594	2.17474	1.40434	1.67258e-16	1.23652e-15
TLR7	0.866101	3.42589	1.98387	4.96684e-66	1.03917e-63			INSL5	0.0671259	0.13603	1.01898	4.46324e-06	9.78955e-06
AL355974.2	5.08012	11.1547	1.13472	4.32266e-11	1.77655e-10			C6	0.0176153	0.277969	3.98002	2.33115e-24	3.9359e-23
TNFRSF1B	5.32956	14.9144	1.48462	4.08408e-75	4.01234e-72			LRMDA	0.359255	0.774347	1.10797	2.72013e-45	2.68999e-43
MUM1L1	1.00665	0.441682	-1.18849	5.70226e-14	3.12132e-13			MIR6503	0.129544	0.48722	1.91113	1.4387e-13	7.63074e-13
C1QL2	3.16913	1.56668	-1.01638	3.14308e-15	1.94738e-14			LINC00574	0.522416	0.259487	-1.00954	7.03184e-13	3.44194e-12
LINC01995	0.0746717	0.151048	1.01637	2.97522e-06	7.15345e-06			TMEM61	0.0531998	0.168661	1.66464	3.5016e-11	1.42029e-10
EPHX4	1.63847	0.711944	-1.20252	1.17351e-13	6.22312e-13			PNPLA5	0.188571	0.0898281	-1.06987	5.61894e-08	1.55984e-07
CHRNA4	3.1104	1.53539	-1.01849	3.31537e-25	4.87405e-24			AQP5	0.25446	1.33218	2.38828	0.000186558	0.000331291
PLCXD2	0.634595	0.312578	-1.02162	5.69923e-16	3.78097e-15			MYL12A	7.72391	17.3334	1.16615	2.45869e-51	5.2987e-49
AGR3	0.0418211	0.286601	2.77674	4.98091e-06	1.16558e-05			AC005740.1	1.00033	0.319977	-1.64444	1.94616e-22	2.72248e-21
AC013470.2	0.022877	0.29377	3.68272	9.26189e-06	2.10502e-05			AL133371.2	0.611391	1.44241	1.23831	3.25269e-35	1.46269e-33
LY75	0.181744	0.399582	1.13659	3.09234e-48	2.00789e-46			AC253536.4	0.240266	0.591856	1.30061	5.0536e-05	9.66304e-05
PRRG3	0.800294	0.230999	-1.79264	2.28931e-13	1.17433e-12			DHH	0.0873303	0.199916	1.19484	2.04348e-12	9.48421e-12
LYN	2.45531	6.15212	1.32517	4.52987e-61	5.71827e-59			SLC37A2	1.05544	2.66365	1.33555	1.92546e-38	1.09416e-36
AC011899.2	0.130599	0.51556	1.981	4.81872e-58	4.69327e-56			FAM180B	0.252274	0.807865	1.67913	8.95278e-12	3.87935e-11
GAS6-AS1	0.137121	0.310668	1.17992	1.17351e-29	2.47588e-28			SYK	2.57292	6.8224	1.40687	4.03872e-50	7.09696e-48
IFNLR1	0.390314	1.21702	1.64065	2.50429e-42	1.25749e-40			VN1R87P	0.243662	0.0960286	-1.34334	6.34822e-17	4.8795e-16
TRPV6	0.294442	0.120709	-1.28645	3.60041e-08	1.08098e-07			AC023421.1	2.13126	0.822009	-1.37448	4.46366e-07	1.10883e-06
LYL1	1.35878	3.47325	1.35397	2.86426e-57	2.74241e-55			CYTL1	2.98042	6.90357	1.21183	3.49508e-34	1.436e-32
JAZF1-AS1	0.279006	0.113268	-1.30056	8.49568e-14	4.57067e-13			KCNK13	0.600679	1.54328	1.36134	4.92282e-40	3.1589e-38
GZMK	0.0679602	0.352933	2.37663	3.35697e-21	3.50851e-20			TMEM155	2.92317	1.3085	-1.15962	7.45755e-07	1.80142e-06
FPR2	0.0427583	0.185458	2.11682	7.33532e-29	1.46034e-27			CAMK1G	5.72768	2.49586	-1.19841	1.10821e-07	2.96059e-07
SRRM4	3.07457	0.865995	-1.82795	2.04832e-31	5.03085e-30			IGLV3-19	0.0966747	1.20701	3.64215	1.09716e-06	2.59162e-06
JCHAIN	0.187903	2.14715	3.51436	5.11616e-09	1.69312e-08			C21orf62	1.9313	5.1976	1.42827	7.67033e-17	5.85436e-16
IGHG2	0.56503	4.98203	3.14034	3.25937e-11	1.35783e-10			LUM	0.613503	3.3202	2.43613	1.83917e-24	3.13772e-23
PCDH20	0.147157	0.0643893	-1.19247	2.67467e-21	2.81363e-20			PYCARD	2.3167	5.79768	1.3234	3.44689e-43	2.89488e-41
C20orf197	0.0908012	0.229187	1.33574	1.11664e-40	5.17039e-39			AC147067.1	0.226086	0.481637	1.09108	3.8975e-29	1.03049e-27
GABRA4	1.43378	0.378351	-1.92203	4.99595e-25	7.25038e-24			PSORS1C1	0.145803	0.393798	1.43343	2.71699e-27	6.12099e-26
TCF24	0.0656266	0.13846	1.07711	5.19337e-13	2.57176e-12			TLR2	1.77735	6.21369	1.80573	6.04334e-49	8.62838e-47
AC244502.1	0.325927	0.107713	-1.59736	9.1823e-08	2.63705e-07			CD7	0.16785	0.558262	1.73377	3.16114e-49	4.78233e-47
STXBP5-AS1	0.56116	0.239333	-1.22939	7.97515e-25	1.13623e-23			DRC7	0.161479	0.614863	1.92891	9.30298e-22	1.21438e-20
FAM181A	2.06838	5.00379	1.27452	1.31974e-14	7.66604e-14			IGLV1-44	0.111667	1.56972	3.81323	5.71965e-08	1.58568e-07
ID3	84.0298	169.997	1.01653	2.45998e-27	4.3023e-26			FAM81B	0.0821723	1.10246	3.74594	1.58775e-12	7.4539e-12
TRIM67	11.1333	2.07718	-2.42218	1.06019e-27	1.90581e-26			TC2N	0.345704	0.903168	1.38546	5.85108e-21	6.97974e-20
AC138430.1	0.186198	0.0690112	-1.43194	6.7026e-13	3.286e-12			SPEF1	1.33101	3.24598	1.28613	1.18281e-05	2.45281e-05
CD180	0.352098	1.25775	1.8368	6.30542e-54	5.18099e-52			PRSS23	1.2555	3.15862	1.33104	6.87955e-25	1.22683e-23
AC138649.1	1.83054	0.77069	-1.24804	9.49289e-11	3.7612e-10			STEAP3	1.75813	7.11898	2.01763	2.24908e-31	7.3713e-30
TRHDE	0.626454	0.173957	-1.84848	2.07532e-20	2.0416e-19			AL590648.3	0.129043	0.333827	1.37125	3.59024e-28	8.79993e-27
TAGLN2	24.0293	51.2601	1.09304	1.07831e-16	7.6621e-16			FCGR3B	0.172117	0.372497	1.11384	2.09731e-20	2.37418e-19
HCN4	0.555719	0.231151	-1.26552	2.14171e-24	2.95086e-23			CTSS	4.29682	13.2885	1.62883	3.13737e-57	2.47138e-54
PAQR9	0.236706	0.115508	-1.0351	4.47813e-20	4.27497e-19			CCL3L1	5.5143	13.4695	1.28844	9.89326e-05	0.000182451
IDO1	0.0361403	0.42861	3.56798	7.64665e-20	7.12217e-19			LILRB3	0.11858	0.331833	1.4846	1.98344e-34	8.35973e-33
AC113133.1	0.245626	0.537204	1.12901	1.30608e-13	6.89216e-13			ST7-AS2	0.0854682	0.31717	1.8918	1.76081e-11	7.37243e-11
IL1R1	0.946553	2.53211	1.41959	5.4648e-12	2.45786e-11			CACNG2	4.76078	1.60101	-1.57221	1.24283e-26	2.62153e-25
COL6A3	0.273999	0.951759	1.79642	2.76836e-08	8.41117e-08			MET	0.676357	3.33204	2.30055	3.84223e-05	7.45853e-05
CD3D	0.148174	0.667126	2.17066	1.03518e-21	1.12945e-20			ITK	0.0337344	0.317229	3.23323	8.16288e-31	2.51311e-29
SAMSN1	1.67213	5.64539	1.75539	6.22103e-63	9.37136e-61			SFRP4	1.74926	6.67695	1.93244	4.52417e-34	1.84554e-32
CASP4	0.494918	1.39991	1.50007	8.58229e-58	8.32298e-56			SNAI1	0.448989	1.06016	1.23953	1.25227e-11	5.34007e-11
ABCC8	9.21848	3.49533	-1.3991	7.60636e-28	1.37609e-26			FSTL1	6.01748	15.3524	1.35123	1.67564e-41	1.22295e-39
SLC7A7	1.35408	4.1758	1.62474	7.09481e-74	4.33282e-71			GMFG	4.61978	9.99708	1.11368	3.1879e-49	4.79107e-47
CHRNA7	0.291373	0.136555	-1.09338	4.55481e-23	5.56628e-22			PODNL1	0.184628	1.09823	2.57248	5.37921e-08	1.49583e-07
FCGR2A	1.6805	6.80002	2.01665	1.8594e-73	1.07731e-70			FCGR1CP	0.874563	2.32125	1.40827	7.51329e-33	2.77724e-31
SLC26A4-AS1	2.22478	0.610698	-1.86513	7.27259e-11	2.91471e-10			AC022182.2	0.242636	0.563142	1.21471	1.67994e-35	7.70614e-34
AL139125.2	0.935057	1.98654	1.08713	1.24827e-24	1.74649e-23			MIR770	10.03	4.73037	-1.0843	1.37487e-14	8.2154e-14
FBXO32	7.66327	18.1807	1.24637	8.497e-33	2.34717e-31			THBD	0.765395	2.00529	1.38954	1.74571e-16	1.28725e-15
IL2RB	0.113981	0.412759	1.85651	3.08843e-17	2.29333e-16			TRAC	0.459903	1.23263	1.42234	3.90324e-20	4.28887e-19
GLYATL1P2	0.271495	0.123938	-1.1313	3.11476e-16	2.11355e-15			GBP3	2.26965	7.61001	1.74543	1.20505e-34	5.19397e-33
FXYD7	14.2012	5.60032	-1.34244	4.59897e-17	3.36306e-16			SSTR3	0.682014	0.292966	-1.21907	4.62535e-08	1.29852e-07
HTR5A	1.23482	0.285983	-2.11029	1.28611e-20	1.28532e-19			RNASE3	0.259867	1.17083	2.17169	1.00527e-39	6.36133e-38
TMEM154	0.142601	0.306481	1.10381	1.9164e-35	6.47278e-34			GPR84	0.250099	0.868556	1.79612	3.89683e-35	1.7489e-33
DRAIC	1.12846	0.557188	-1.01811	6.99598e-19	5.99474e-18			RTN4R	5.8514	2.76408	-1.08198	1.47093e-26	3.07992e-25
VAMP5	19.0757	38.9075	1.02831	1.01384e-37	3.99108e-36			RPL19P20	0.205761	0.0987161	-1.05962	2.08732e-11	8.67434e-11
IGHV3-30	0.190236	0.744501	1.96849	2.09273e-09	7.21834e-09			DLX2	0.491667	0.24075	-1.03015	0.00660374	0.0094536
ABI3	2.85009	9.57287	1.74794	4.14076e-70	1.50693e-67			CDK5R2	14.2416	6.30458	-1.17564	4.76459e-22	6.41003e-21
BIN2	1.31445	3.67128	1.48182	3.05534e-65	5.90072e-63			LINC02223	0.340857	0.146211	-1.22111	1.03244e-12	4.95588e-12
LHX3	0.356591	0.144928	-1.29894	2.13955e-14	1.21992e-13			ABCA4	0.0676643	0.784831	3.53592	0.000562893	0.000936951
AP003071.4	0.0977529	0.28803	1.55901	9.01706e-18	7.03798e-17			KCNB2	0.496027	0.199715	-1.31248	6.0237e-15	3.72914e-14
ABCC3	0.277173	2.14818	2.95426	1.46063e-23	1.87099e-22			TP63	0.0367564	0.173472	2.23863	4.34824e-12	1.95303e-11
HLA-DOA	1.71807	10.0083	2.54233	5.51417e-57	5.25731e-55			LINC02513	0.0685015	0.475796	2.79614	8.26135e-16	5.63686e-15
STXBP1	46.4216	19.1405	-1.27816	8.40157e-34	2.50782e-32			HOXA-AS2	0.0713075	0.243754	1.7733	4.63243e-19	4.59103e-18
LRFN5	2.14259	1.03914	-1.04396	1.68147e-13	8.77472e-13			FGL2	1.74686	5.96909	1.77275	2.12374e-51	4.80343e-49
PVALB	4.06985	1.14244	-1.83285	9.05734e-18	7.06698e-17			GSDMA	0.137076	0.382349	1.47992	3.7198e-13	1.88708e-12
CCK	15.4008	4.36265	-1.81973	7.55968e-14	4.08754e-13			DOK2	0.260375	0.690089	1.40619	5.84882e-19	5.74175e-18
CAMKV	15.8703	4.97895	-1.67241	2.96395e-18	2.40307e-17			LY96	3.02566	8.88909	1.55479	1.43946e-50	2.71761e-48
AC018755.4	0.805312	2.44098	1.59984	2.45737e-39	1.05564e-37			B3GALT5-AS1	0.51903	1.2279	1.2423	7.26121e-27	1.57228e-25
WDR45P1	0.152212	0.722079	2.24608	1.21179e-51	8.91912e-50			ASGR2	0.111019	0.298829	1.42851	1.60398e-36	7.94821e-35
SYN1	52.8514	18.0766	-1.54782	3.07705e-31	7.4522e-30			MYH7	9.91445	4.59811	-1.10849	1.41692e-12	6.68485e-12
PNMA6F	1.46182	0.384643	-1.92618	6.02642e-13	2.96544e-12			AL357060.1	0.0819531	0.182764	1.15711	6.56488e-26	1.28287e-24
DDIT4L	0.919649	2.3566	1.35755	1.00783e-09	3.58573e-09			CABP4	0.184615	0.449189	1.2828	6.58834e-34	2.63119e-32
GPR63	0.530686	0.240476	-1.14196	5.37737e-26	8.45561e-25			HAVCR2	3.72614	10.7623	1.53023	2.67247e-53	8.25e-51
CYBA	5.25083	16.8283	1.68027	1.00317e-74	8.39545e-72			C1orf194	1.85795	5.64997	1.60453	1.66342e-15	1.0935e-14
TUBA4A	16.6431	7.93966	-1.06778	7.8683e-05	0.000158277			LILRA1	0.438019	1.26739	1.53279	9.90922e-48	1.25759e-45
NCF2	1.77866	4.62903	1.37992	5.266e-61	6.53794e-59			PLD4	2.43883	5.96945	1.29141	9.32707e-36	4.37511e-34
KCNAB1	4.19332	1.97559	-1.08581	1.23367e-24	1.7282e-23			SYNC	0.578235	1.51751	1.39198	1.97615e-15	1.2887e-14
AC119044.1	0.175878	0.591883	1.75073	1.30992e-55	1.16531e-53			BTBD19	0.716845	1.45088	1.0172	1.00608e-19	1.06156e-18
HOXA1	0.083741	0.260423	1.63685	9.84322e-29	1.93743e-27			INHBA	0.398885	0.957592	1.26344	6.87173e-08	1.88585e-07
ALOX5AP	4.25925	18.1603	2.09212	1.11391e-62	1.63441e-60			SAMD9L	1.84927	4.85252	1.39178	1.12534e-36	5.6252e-35
CPLX2	49.6192	13.8743	-1.83848	5.83245e-33	1.62704e-31			IL2RG	0.392219	1.29043	1.71812	6.27442e-46	6.72924e-44
FERMT3	2.95291	9.12364	1.62747	3.32388e-74	2.27595e-71			MNX1	0.266473	0.13125	-1.02167	2.31553e-06	5.24971e-06
CHGB	44.869	15.551	-1.52871	5.12858e-34	1.54927e-32			LY86	6.53323	17.6501	1.43381	4.74691e-50	8.21504e-48
MAST1	10.8965	5.34516	-1.02756	6.67593e-37	2.48108e-35			SOWAHD	0.377541	0.826467	1.13032	3.62225e-24	6.00921e-23
SMIM25	0.097636	0.293673	1.58873	8.46182e-28	1.5284e-26			AC009533.2	0.246814	0.118185	-1.06237	5.05309e-10	1.78799e-09
KCNC2	3.2372	0.833603	-1.95731	1.20272e-25	1.83999e-24			CTSW	0.222832	0.680296	1.61021	3.9481e-29	1.04266e-27
AL132711.1	0.102059	0.287689	1.4951	2.71632e-10	1.02673e-09			AC027237.3	0.0640059	0.143816	1.16795	4.29628e-09	1.35915e-08
AC010255.1	0.0575228	0.275094	2.25772	5.01505e-18	3.98453e-17			COL6A2	3.90262	14.3293	1.87645	3.16388e-23	4.77382e-22
CD8B	0.0579544	0.174717	1.59203	1.24271e-14	7.24651e-14			CLDN23	0.162328	0.394041	1.27943	5.57537e-34	2.25423e-32
CHI3L1	17.3629	189.281	3.44645	3.6767e-10	1.37003e-09			SLC15A3	1.97495	5.15326	1.38367	3.61224e-54	1.36478e-51
FGFBP2	0.719382	1.6898	1.23203	1.13951e-15	7.37773e-15			IGLV7-46	0.0998276	0.479956	2.26539	3.19834e-09	1.0266e-08
PI16	7.58519	19.3531	1.35131	9.64772e-19	8.17398e-18			EGR1	46.5869	98.1432	1.07496	2.28214e-14	1.33095e-13
SLITRK1	7.20069	3.50684	-1.03797	4.52352e-30	9.79995e-29			IL15	0.0536265	0.167569	1.64373	3.89119e-33	1.47413e-31
PSD	27.3458	10.9749	-1.31711	6.04133e-35	1.95853e-33			SMPX	0.260957	0.103571	-1.3332	1.96618e-07	5.11042e-07
PDE6H	0.35304	0.0753578	-2.228	4.85542e-06	1.13799e-05			CES1	0.218738	0.534445	1.28884	7.65267e-10	2.64996e-09
AL356479.1	1.19344	0.320483	-1.89681	2.10852e-11	8.95901e-11			WWTR1	4.79681	12.9662	1.43461	3.09137e-36	1.50254e-34
C10orf82	0.150025	0.0603893	-1.31284	5.4702e-12	2.45979e-11			PIK3CG	0.240804	0.788609	1.71145	6.23795e-44	5.50192e-42
HK3	0.345088	1.00035	1.53546	9.09286e-26	1.40631e-24			CAV2	1.09813	2.30083	1.06711	1.01913e-12	4.89403e-12
CCDC81	0.218394	0.461144	1.07828	1.21525e-16	8.59728e-16			AC005083.1	0.0610244	0.174916	1.51921	1.19194e-09	4.02971e-09
LRGUK	0.165093	0.354783	1.10365	4.5487e-19	3.95776e-18			CFAP77	0.465774	1.33556	1.51974	0.0124598	0.0171403
CD84	1.00538	3.45666	1.78164	1.01663e-60	1.23504e-58			FABP5	1.92525	5.82087	1.59619	3.80752e-12	1.71624e-11
ITGB2-AS1	0.328335	0.827333	1.3333	4.49587e-31	1.07048e-29			ANXA2P2	0.253096	1.09158	2.10866	2.38909e-41	1.69492e-39
CRYBB1	1.38783	3.36894	1.27946	6.92282e-37	2.56861e-35			HLA-DQA2	1.14134	9.08774	2.99319	4.72188e-23	7.02715e-22
ZNF98	0.364621	0.144268	-1.33765	2.59138e-30	5.71268e-29			CASP5	0.0564069	0.230453	2.03053	4.64108e-38	2.54246e-36
AC009654.1	0.132577	0.457465	1.78683	2.16308e-24	2.97849e-23			TMCO4	1.41286	2.97547	1.0745	6.52223e-36	3.11052e-34
CD68	0.291433	0.711705	1.28811	6.19763e-49	4.08284e-47			TFCP2L1	0.656068	1.86216	1.50506	1.57242e-11	6.62247e-11
TIMD4	0.0736482	0.3011	2.03152	3.22549e-34	9.97033e-33			COL17A1	0.203826	0.0905594	-1.1704	2.07572e-10	7.70644e-10
HPSE	0.951205	2.47974	1.38236	1.40681e-39	6.16053e-38			AC063977.2	0.0641209	0.201076	1.64887	1.84862e-24	3.15149e-23
PDLIM4	1.82179	4.84212	1.41028	0.00960126	0.0142412			AC002091.2	0.238852	0.605411	1.3418	1.35821e-31	4.52947e-30
SOCS1	0.628351	1.32824	1.07987	5.78467e-09	1.9029e-08			LINC00278	0.0680473	0.169826	1.31945	5.11819e-07	1.26318e-06
LINC01842	0.104952	0.226791	1.11163	0.0299238	0.0408382			HOXB3	0.318068	0.663435	1.06062	3.81428e-22	5.1927e-21
CLEC4GP1	0.899222	0.276024	-1.70388	7.37346e-20	6.87621e-19			CELSR1	0.291717	0.657348	1.17209	4.16637e-15	2.62483e-14
MYT1L	4.27931	0.967988	-2.14432	3.12837e-35	1.04107e-33			CDH9	0.714515	0.305204	-1.22719	7.40817e-15	4.55048e-14
BHLHE22	0.666151	0.27654	-1.26836	5.51789e-08	1.62347e-07			AL353658.2	0.344075	0.156252	-1.13885	1.53057e-19	1.58425e-18
PTGFR	0.521757	0.221065	-1.23891	1.23026e-13	6.50422e-13			DOCK8	1.07438	2.75546	1.35879	7.08828e-46	7.53138e-44
BLK	0.178403	0.0439185	-2.02224	1.50624e-09	5.26531e-09			CFAP54	0.122084	0.349019	1.51543	1.29442e-12	6.13353e-12
ADAMTS15	1.36118	3.51967	1.37059	2.33326e-20	2.28038e-19			AC015468.3	0.796341	0.350164	-1.18535	2.52798e-05	5.02691e-05
LINC00460	0.253793	0.10107	-1.32829	3.33109e-08	1.00359e-07			HCN1	1.95119	0.930535	-1.06822	8.74203e-06	1.84519e-05
LRRTM1	3.79566	1.74367	-1.12222	1.00896e-35	3.45432e-34			MMP24	8.56189	4.1688	-1.0383	5.00853e-22	6.71843e-21
STYK1	1.01946	0.216523	-2.23522	6.39304e-21	6.56922e-20			KCNK12	1.60676	0.791731	-1.02107	1.01354e-20	1.18068e-19
PRPH2	0.632609	0.238789	-1.40558	2.70459e-09	9.21628e-09			AC147651.3	0.431161	1.1713	1.44181	6.63729e-41	4.48587e-39
STXBP5	2.96293	1.4641	-1.01701	1.76443e-29	3.69157e-28			SPA17	1.16949	2.49484	1.09307	7.92795e-22	1.04444e-20
AL031593.1	0.361971	0.0832477	-2.12039	4.69935e-15	2.85832e-14			CCDC153	0.233288	0.470638	1.0125	2.29224e-14	1.33649e-13
AL022313.4	12.6086	4.1824	-1.59201	4.43329e-33	1.24906e-31			TUBB6	3.26813	8.21094	1.32908	4.67866e-31	1.49065e-29
EFEMP1	24.5932	53.1797	1.11261	4.89854e-20	4.65464e-19			GSX2	0.293273	0.611593	1.06033	0.00178829	0.00278035
FPR1	2.50053	12.2524	2.29276	2.30338e-65	4.52584e-63			CYBB	6.04852	19.7834	1.70964	9.46271e-54	3.22636e-51
TCERG1L	0.552866	0.191623	-1.52866	1.37723e-13	7.24732e-13			AC007922.3	0.309817	0.147309	-1.07258	0.000310658	0.000535032
AP005242.4	0.376119	0.0994615	-1.91898	1.79102e-13	9.31412e-13			FABP5P7	0.102004	0.301111	1.56167	1.2263e-09	4.13973e-09
Z82196.1	0.320389	0.0911288	-1.81385	3.78338e-23	4.67666e-22			RPL32P1	0.0523099	0.194338	1.89341	4.21882e-16	2.98189e-15
BATF3	0.808222	1.94496	1.26692	2.71107e-31	6.58703e-30			CYP19A1	0.0718445	0.191931	1.41764	4.55762e-22	6.14606e-21
P2RY13	3.1161	7.8359	1.33036	1.01933e-42	5.21103e-41			IRX5	0.261092	0.540298	1.04919	4.67131e-14	2.6329e-13
DHRS9	1.23458	2.95887	1.26103	3.4541e-17	2.55145e-16			SLC16A12	0.0652119	0.1838	1.49493	0.00378027	0.00561705
APOBEC3C	2.44687	7.08763	1.53437	1.16014e-54	9.89226e-53			LINC01480	0.986898	2.21632	1.16719	2.1772e-21	2.72675e-20
AR	1.03859	2.45066	1.23855	2.06205e-31	5.05907e-30			PCDHA5	0.250864	0.10754	-1.22204	2.35378e-16	1.70536e-15
CA10	16.3847	7.22294	-1.18169	3.03638e-22	3.4669e-21			ERP27	0.105836	0.374805	1.82431	4.183e-29	1.10215e-27
AC103681.2	0.24224	0.0770377	-1.6528	8.70913e-14	4.67994e-13			MMP3	0.0580665	0.190987	1.71769	1.77647e-05	3.60182e-05
CEBPE	0.058214	0.146037	1.3269	9.59595e-36	3.29529e-34			AC103855.2	0.264503	0.116472	-1.1833	6.35497e-08	1.75287e-07
CYCSP8	0.237066	0.068869	-1.78336	1.34642e-24	1.87916e-23			SSC5D	0.458391	0.923976	1.01128	2.46194e-06	5.5634e-06
IGLV1-40	0.154863	1.78397	3.52602	1.09543e-09	3.88028e-09			GDF15	0.390423	1.94463	2.31638	6.35602e-11	2.49522e-10
S100A4	2.13574	8.42619	1.98014	4.58007e-32	1.19643e-30			RASGRP4	0.527734	1.2765	1.27431	4.68683e-47	5.51886e-45
MMD2	23.2103	8.79588	-1.39986	6.468e-29	1.29337e-27			SRPX2	0.793621	4.02147	2.3412	2.91462e-34	1.20619e-32
MICB	0.496951	1.09032	1.13357	5.83172e-35	1.89602e-33			ARPC1B	7.22161	17.5627	1.28213	2.47848e-55	1.20465e-52
GABRD	21.0693	9.19286	-1.19656	1.33336e-15	8.5617e-15			RIMS1	2.03154	0.930999	-1.12572	1.76922e-17	1.46488e-16
ANK1	2.24989	1.05708	-1.08977	1.65222e-26	2.71123e-25			VASN	1.37363	4.32	1.65304	9.38017e-16	6.35847e-15
ITGB7	0.0890384	0.196513	1.14213	1.21431e-19	1.10729e-18			CLEC12A	0.0382674	0.242104	2.66144	1.06172e-31	3.58256e-30
AL161618.1	0.022393	0.188094	3.07033	0.000104813	0.000207151			AMH	8.45995	4.11884	-1.03841	2.4119e-19	2.44335e-18
KIF5A	92.2872	36.892	-1.32282	2.4119e-19	2.1448e-18			CSTA	0.229571	1.05181	2.19585	4.51585e-42	3.43867e-40
LINC01586	0.238058	0.0793236	-1.58549	4.33994e-36	1.52512e-34			SEMA3A	0.539044	1.11329	1.04636	0.011796	0.0162811
[truncated: 294 more rows]

## Sheet: Table 3
Query	Statistic	P-value	FDR (BH)	Event_SD	Event_TD
SERPINE1	1	1e-94	1e-90	516	516
FOSL1	0.749797	3.01665e-94	3.02962e-90	516	516
ITGA5	0.730085	4.90892e-87	3.28669e-83	516	516
GADD45A	0.729341	8.92459e-87	4.48148e-83	516	516
TNFRSF12A	0.717687	8.0903e-83	3.25003e-79	516	516
SOCS3	0.683871	2.17109e-72	7.2681e-69	516	516
SRPX2	0.667926	5.98788e-68	1.71818e-64	516	515
PLK3	0.660602	5.3178e-66	1.33517e-62	516	516
CLCF1	0.646269	2.42288e-62	5.40732e-59	516	516
ATF3	0.640055	8.12894e-61	1.59849e-57	516	516
TIMP1	0.639923	8.75404e-61	1.59849e-57	516	516
NAMPT	0.639536	1.08623e-60	1.81816e-57	516	516
PDLIM1	0.638495	1.93908e-60	2.99602e-57	516	516
PLAUR	0.636698	5.24459e-60	7.52449e-57	516	516
SERPINA5	0.635123	1.24832e-59	1.67158e-56	516	498
TREM1	0.634596	1.66661e-59	2.09222e-56	516	479
GADD45B	0.630797	1.31508e-58	1.5538e-55	516	516
CLIC1	0.630526	1.5222e-58	1.6986e-55	516	516
KLF6	0.629919	2.11212e-58	2.23285e-55	516	516
TAGLN2	0.629566	2.55401e-58	2.56499e-55	516	516
C5orf62	0.627105	9.52981e-58	9.11504e-55	516	516
LIF	0.623259	7.29192e-57	6.65752e-54	516	515
ANXA1	0.623089	7.97682e-57	6.96619e-54	516	516
DUSP5	0.621162	2.18643e-56	1.82986e-53	516	516
IGFBP3	0.61745	1.49555e-55	1.20158e-52	516	516
NNMT	0.614869	5.60653e-55	4.33126e-52	516	516
MYL12A	0.611311	3.39965e-54	2.52909e-51	516	516
ZFP36	0.611074	3.83116e-54	2.74831e-51	516	516
FOSL2	0.610843	4.30298e-54	2.98033e-51	516	516
JUN	0.608789	1.20312e-53	8.05526e-51	516	516
SERPINA3	0.608247	1.57585e-53	1.02105e-50	516	516
CAV1	0.606063	4.65534e-53	2.9221e-50	516	516
PPP1R15A	0.605517	6.09548e-53	3.71012e-50	516	516
TPM4	0.602223	3.06345e-52	1.80978e-49	516	516
METTL7B	0.600996	5.56329e-52	3.19269e-49	516	516
ADM	0.600572	6.83175e-52	3.81174e-49	516	516
SOD2	0.60009	8.62978e-52	4.68481e-49	516	516
GPRC5A	0.600003	8.99917e-52	4.74532e-49	516	512
ABCC3	0.599954	9.21375e-52	4.74532e-49	516	514
CHSY1	0.594624	1.18337e-50	5.94227e-48	516	516
ACTN1	0.59369	1.84197e-50	9.02383e-48	516	516
LOC541471	0.593256	2.26184e-50	1.0386e-47	516	516
PRSS23	0.593215	2.30618e-50	1.0386e-47	516	516
COL4A2	0.593211	2.3104e-50	1.0386e-47	516	516
SERPINB8	0.593196	2.32685e-50	1.0386e-47	516	516
ITPKC	0.593074	2.46419e-50	1.07599e-47	516	516
HSPA6	0.592942	2.62266e-50	1.12082e-47	516	516
SPOCD1	0.592504	3.22393e-50	1.34908e-47	516	516
SERTAD1	0.592247	3.63867e-50	1.49156e-47	516	516
FAM115C	0.592194	3.7308e-50	1.4961e-47	516	516
FILIP1L	0.592156	3.79873e-50	1.4961e-47	516	516
NCRNA00152	0.591782	4.52723e-50	1.74873e-47	516	516
ZYX	0.590682	7.5842e-50	2.87427e-47	516	516
KIAA0040	0.589958	1.06356e-49	3.95605e-47	516	516
ANXA2P2	0.589919	1.08357e-49	3.95721e-47	516	516
SPRY1	0.588057	2.57563e-49	9.23822e-47	516	516
IL1R1	0.587975	2.67657e-49	9.43187e-47	516	516
COL4A1	0.587471	3.37974e-49	1.17044e-46	516	516
MAP2K3	0.586605	5.04321e-49	1.71691e-46	516	516
FAM129A	0.58616	6.19014e-49	2.07225e-46	516	516
CHI3L1	0.584876	1.11701e-48	3.67806e-46	516	516
MYH9	0.584185	1.53301e-48	4.96647e-46	516	516
FNDC3B	0.583926	1.72541e-48	5.50106e-46	516	516
TES	0.583465	2.13005e-48	6.68502e-46	516	516
JUNB	0.583422	2.17204e-48	6.71194e-46	516	516
LAMC1	0.582517	3.28185e-48	9.98776e-46	516	516
ITGB3	0.581772	4.60166e-48	1.37954e-45	516	516
OSMR	0.581072	6.32076e-48	1.86704e-45	516	516
ITPRIP	0.579956	1.04656e-47	3.04656e-45	516	516
MYOF	0.579899	1.07369e-47	3.08088e-45	516	516
LATS2	0.579777	1.13433e-47	3.20904e-45	516	516
SLC11A1	0.578787	1.77081e-47	4.94007e-45	516	516
ARC	0.575251	8.58435e-47	2.36199e-44	516	516
ANXA2	0.574877	1.01301e-46	2.74964e-44	516	516
PLAU	0.574094	1.43259e-46	3.83667e-44	516	516
HSPG2	0.573818	1.61803e-46	4.27627e-44	516	516
SRPR	0.573543	1.82665e-46	4.76496e-44	516	516
ARID5A	0.573002	2.31905e-46	5.97185e-44	516	516
CCDC109B	0.570189	7.95104e-46	2.02158e-43	516	516
NEDD9	0.569378	1.13217e-45	2.84259e-43	516	516
MPZL2	0.568139	1.93808e-45	4.80596e-43	516	515
SERPINH1	0.567977	2.0781e-45	5.08377e-43	516	516
ITGB1	0.567952	2.10073e-45	5.08377e-43	516	516
GDF15	0.567396	2.67159e-45	6.38828e-43	516	515
DNAJB1	0.566766	3.50613e-45	8.24105e-43	516	516
SH2D2A	0.566751	3.52848e-45	8.24105e-43	516	506
PLEK2	0.566585	3.79062e-45	8.75154e-43	516	495
TRPM8	0.565813	5.28353e-45	1.20597e-42	516	481
CASP4	0.565286	6.6227e-45	1.49465e-42	516	516
EMP3	0.564131	1.08585e-44	2.42337e-42	516	516
SHC1	0.564012	1.14238e-44	2.52152e-42	516	516
IL4R	0.563546	1.39367e-44	3.04274e-42	516	516
C1RL	0.562703	1.99549e-44	4.30983e-42	516	516
SRGN	0.560825	4.42095e-44	9.44673e-42	516	516
SERPING1	0.56078	4.50488e-44	9.46486e-42	516	516
CD93	0.560771	4.52368e-44	9.46486e-42	516	516
VDR	0.560642	4.77505e-44	9.80707e-42	516	512
CSDA	0.560638	4.78489e-44	9.80707e-42	516	516
EMR2	0.560596	4.8693e-44	9.87927e-42	516	516
CISH	0.560529	5.00922e-44	1.00615e-41	516	516
THBS1	0.559676	7.1746e-44	1.42682e-41	516	516
MSN	0.559087	9.18925e-44	1.80956e-41	516	516
NFIL3	0.558137	1.36826e-43	2.66824e-41	516	516
WDR1	0.556132	3.15736e-43	6.09796e-41	516	516
IFNGR2	0.555502	4.10174e-43	7.84643e-41	516	516
LOC154761	0.55518	4.68661e-43	8.88069e-41	516	516
DUSP1	0.555052	4.94368e-43	9.28025e-41	516	516
SLC10A3	0.554903	5.25791e-43	9.77874e-41	516	516
ISG20	0.554644	5.85145e-43	1.07828e-40	516	516
TMEM49	0.55461	5.93431e-43	1.0836e-40	516	516
ADAMTS1	0.554481	6.26011e-43	1.1328e-40	516	516
RAB27A	0.553652	8.81437e-43	1.58076e-40	516	516
C1R	0.552551	1.38643e-42	2.4644e-40	516	516
EMP1	0.551733	1.93887e-42	3.41615e-40	516	516
SP100	0.551616	2.03356e-42	3.55183e-40	516	516
CYR61	0.551146	2.46498e-42	4.26825e-40	516	516
MAFF	0.550901	2.72504e-42	4.67822e-40	516	516
FOS	0.550709	2.94711e-42	5.01658e-40	516	516
HSPA7	0.550244	3.56237e-42	6.01292e-40	516	515
TMEM71	0.54902	5.85843e-42	9.80604e-40	516	516
LSP1	0.54858	7.00288e-42	1.16248e-39	516	516
CHI3L2	0.548402	7.52722e-42	1.23928e-39	516	516
RGS16	0.547851	9.40497e-42	1.53584e-39	516	516
IQGAP2	0.547736	9.85171e-42	1.59582e-39	516	516
FSTL1	0.546218	1.81658e-41	2.89586e-39	516	516
CD163	0.546109	1.89759e-41	3.00118e-39	516	516
IGFBP2	0.5456	2.32857e-41	3.65403e-39	516	516
STX11	0.545268	2.65965e-41	4.14122e-39	516	516
MCL1	0.54416	4.14212e-41	6.3999e-39	516	516
MBD2	0.5441	4.24318e-41	6.50599e-39	516	516
ECE1	0.543823	4.73854e-41	7.21048e-39	516	516
BACE2	0.543483	5.42601e-41	8.1945e-39	516	516
FAM20C	0.543153	6.18838e-41	9.27611e-39	516	516
COL5A1	0.542573	7.7928e-41	1.15945e-38	516	516
MGP	0.542391	8.37476e-41	1.23688e-38	516	516
S100A11	0.541731	1.08812e-40	1.59533e-38	516	516
PSTPIP2	0.541706	1.09895e-40	1.59953e-38	516	516
C21orf7	0.541184	1.35101e-40	1.95226e-38	516	516
THBD	0.541019	1.44202e-40	2.06888e-38	516	516
MAP3K6	0.540759	1.59742e-40	2.27559e-38	516	516
TNFRSF11B	0.540664	1.65875e-40	2.34632e-38	516	515
COL8A1	0.540458	1.79887e-40	2.52671e-38	516	514
PRDM1	0.539997	2.15708e-40	2.9937e-38	516	516
COL6A2	0.539993	2.16114e-40	2.9937e-38	516	516
GBP1	0.539595	2.52713e-40	3.47671e-38	516	516
PLSCR1	0.538416	4.01324e-40	5.48367e-38	516	516
MSR1	0.535568	1.21767e-39	1.65257e-37	516	516
S100A4	0.53533	1.33546e-39	1.80028e-37	516	516
CTGF	0.534476	1.85817e-39	2.48821e-37	516	516
FAM46A	0.534159	2.09984e-39	2.77483e-37	516	516
SAT1	0.533912	2.31006e-39	3.03267e-37	516	516
ANXA2P1	0.53342	2.79304e-39	3.64293e-37	516	514
C13orf29	0.532574	3.86674e-39	5.0108e-37	516	516
RGS1	0.531909	4.98983e-39	6.42473e-37	516	516
LTBR	0.530806	7.60689e-39	9.73197e-37	516	516
CHRNA9	0.52925	1.37592e-38	1.74916e-36	516	456
FGR	0.528675	1.71091e-38	2.16134e-36	516	516
UPP1	0.527528	2.64035e-38	3.31463e-36	516	516
F11R	0.527246	2.93686e-38	3.66396e-36	516	516
ICAM1	0.526244	4.2831e-38	5.31051e-36	516	516
HYAL2	0.526179	4.38918e-38	5.40865e-36	516	516
TNFRSF10D	0.52582	5.02301e-38	6.15196e-36	516	516
CEBPB	0.525476	5.71446e-38	6.9564e-36	516	516
C10orf10	0.524614	7.89282e-38	9.55032e-36	516	516
FKBP5	0.524357	8.68934e-38	1.04511e-35	516	516
MIR155HG	0.524241	9.07319e-38	1.08479e-35	516	512
TLR2	0.524167	9.32626e-38	1.10845e-35	516	516
TNFAIP3	0.523094	1.39135e-37	1.64392e-35	516	516
CAST	0.522957	1.46433e-37	1.72003e-35	516	516
HEXB	0.522835	1.53232e-37	1.78943e-35	516	516
CEBPD	0.52273	1.59332e-37	1.84991e-35	516	516
REXO2	0.52236	1.82779e-37	2.09788e-35	516	516
PLBD1	0.522284	1.87963e-37	2.14512e-35	516	516
EPHA2	0.521959	2.12104e-37	2.40697e-35	516	516
KDELR3	0.521426	2.5834e-37	2.91518e-35	516	516
GBP2	0.521252	2.75539e-37	3.09188e-35	516	516
IFI30	0.521005	3.01841e-37	3.36085e-35	516	516
EGR1	0.520996	3.02854e-37	3.36085e-35	516	516
FCGR2C	0.520859	3.18552e-37	3.51562e-35	516	513
SOCS2	0.520391	3.78575e-37	4.15523e-35	516	516
VASP	0.52021	4.04734e-37	4.4182e-35	516	516
STK40	0.520094	4.22494e-37	4.58714e-35	516	516
STAT3	0.519794	4.71849e-37	5.06821e-35	516	516
S100A6	0.519675	4.92897e-37	5.26613e-35	516	516
RUNX1	0.519003	6.30859e-37	6.70447e-35	516	516
PDCD1	0.518821	6.74434e-37	7.12983e-35	516	485
SH2D4A	0.518653	7.17273e-37	7.54301e-35	516	515
FLNA	0.51807	8.87948e-37	9.28923e-35	516	516
MYO1C	0.517676	1.02576e-36	1.06513e-34	516	516
SLC39A1	0.517668	1.02875e-36	1.06513e-34	516	516
PTPN22	0.517295	1.17894e-36	1.21437e-34	516	500
SLC16A3	0.517183	1.22799e-36	1.25844e-34	516	516
NUAK2	0.517131	1.25138e-36	1.2759e-34	516	516
PIM1	0.517084	1.27327e-36	1.29166e-34	516	516
MLKL	0.51682	1.40164e-36	1.41474e-34	516	516
FAM46B	0.516774	1.42547e-36	1.4316e-34	516	513
FN1	0.516414	1.62527e-36	1.62414e-34	516	516
TYMP	0.516183	1.76738e-36	1.74875e-34	516	516
CLEC5A	0.515536	2.23577e-36	2.20136e-34	516	498
ADPRH	0.515233	2.49531e-36	2.44491e-34	516	516
HLA-DRA	0.515118	2.60123e-36	2.53632e-34	516	516
SLAMF8	0.512866	5.86613e-36	5.69213e-34	516	516
TUBB6	0.512831	5.93969e-36	5.7358e-34	516	516
MACC1	0.512792	6.02368e-36	5.78907e-34	516	489
EMILIN1	0.512477	6.74593e-36	6.45232e-34	516	516
SERPINA1	0.512409	6.91188e-36	6.57972e-34	516	516
ADAM12	0.512222	7.393e-36	7.00452e-34	516	516
DPYD	0.511996	8.01685e-36	7.55993e-34	516	516
ITGA3	0.511391	9.95497e-36	9.34371e-34	516	516
ELF4	0.511319	1.02158e-35	9.54391e-34	516	516
LAMB1	0.511297	1.02963e-35	9.57463e-34	516	516
DPY19L1	0.510162	1.54417e-35	1.42932e-33	516	516
C1S	0.510141	1.55563e-35	1.43332e-33	516	516
ZAK	0.510091	1.5837e-35	1.45252e-33	516	516
TREML3	0.509972	1.65236e-35	1.50861e-33	516	305
HBEGF	0.50987	1.71331e-35	1.55717e-33	516	516
STC1	0.509169	2.19849e-35	1.98914e-33	516	514
ITK	0.509027	2.31204e-35	2.08249e-33	516	500
CFH	0.508494	2.79345e-35	2.50487e-33	516	516
TCTEX1D4	0.508144	3.16255e-35	2.82324e-33	516	396
GLIPR1	0.508079	3.23648e-35	2.87646e-33	516	516
HLA-DPA1	0.507739	3.6492e-35	3.22898e-33	516	516
IRF1	0.507021	4.70348e-35	4.12551e-33	516	516
AREG	0.506742	5.18994e-35	4.52002e-33	516	318
MLX	0.506737	5.19827e-35	4.52002e-33	516	516
CAV2	0.506594	5.46618e-35	4.73248e-33	516	516
TNFAIP8	0.506463	5.72532e-35	4.93557e-33	516	516
ZC3H12A	0.506306	6.04985e-35	5.19305e-33	516	516
PLIN2	0.506048	6.62636e-35	5.66371e-33	516	516
PLEKHA4	0.505954	6.84739e-35	5.82782e-33	516	516
ARHGAP18	0.505906	6.96456e-35	5.90254e-33	516	516
TMEM217	0.505251	8.76436e-35	7.33504e-33	516	516
SECTM1	0.505058	9.37921e-35	7.81705e-33	516	516
CDCP1	0.504363	1.19633e-34	9.88865e-33	516	516
GPR4	0.504269	1.23626e-34	1.01769e-32	516	516
FCGR2A	0.503892	1.40993e-34	1.15047e-32	516	516
AIM1	0.503883	1.41474e-34	1.15047e-32	516	516
SP140L	0.503552	1.58757e-34	1.2858e-32	516	516
PTPN7	0.503501	1.61608e-34	1.30364e-32	516	516
CD80	0.503267	1.75329e-34	1.40866e-32	516	442
HMGA2	0.503042	1.89607e-34	1.51731e-32	516	313
CTSB	0.502824	2.04562e-34	1.62405e-32	516	516
TGIF1	0.502367	2.3979e-34	1.89623e-32	516	516
FAM70B	0.502295	2.45845e-34	1.93649e-32	516	516
PLP2	0.502028	2.6977e-34	2.1084e-32	516	516
COL1A2	0.501954	2.76813e-34	2.15507e-32	516	516
RBMS1	0.501024	3.82006e-34	2.95114e-32	516	516
IL8	0.500649	4.3473e-34	3.34559e-32	516	514
BGN	0.500496	4.58453e-34	3.51469e-32	516	516
SQRDL	0.500201	5.07448e-34	3.87551e-32	516	516
CD63	0.499819	5.78843e-34	4.40403e-32	516	516
CSTA	0.4997	6.03142e-34	4.57159e-32	516	484
PHLDA2	0.498721	8.44417e-34	6.3763e-32	516	495
PECAM1	0.498598	8.80678e-34	6.6252e-32	516	516
GALNT5	0.498386	9.47292e-34	7.09974e-32	516	270
C17orf91	0.498041	1.06606e-33	7.96019e-32	516	516
KYNU	0.497668	1.21105e-33	9.00932e-32	516	515
CD74	0.497346	1.35233e-33	1.00232e-31	516	516
FEM1C	0.497204	1.4192e-33	1.04418e-31	516	516
GLRX	0.497084	1.4788e-33	1.08406e-31	516	516
ADAMTSL4	0.49697	1.53735e-33	1.12288e-31	516	516
CTSC	0.496367	1.88798e-33	1.37398e-31	516	516
FBLN5	0.49619	2.00532e-33	1.45411e-31	516	516
C8orf4	0.496099	2.06856e-33	1.49457e-31	516	516
ETV6	0.495738	2.33881e-33	1.68378e-31	516	516
LOXL2	0.495577	2.4698e-33	1.77173e-31	516	516
S100A3	0.495442	2.58607e-33	1.84853e-31	516	506
TNFRSF1A	0.49534	2.67759e-33	1.90717e-31	516	516
HLA-DPB1	0.49507	2.93382e-33	2.08229e-31	516	516
ANO6	0.494816	3.19787e-33	2.26171e-31	516	516
IRAK3	0.494606	3.43287e-33	2.41939e-31	516	516
FBLIM1	0.493526	4.9464e-33	3.4739e-31	516	516
CD300LB	0.4931	5.70925e-33	3.99568e-31	516	496
HLA-DRB1	0.492898	6.11162e-33	4.26243e-31	516	516
LHFPL2	0.492842	6.22724e-33	4.32804e-31	516	516
GEM	0.49272	6.48832e-33	4.4785e-31	516	516
IQGAP1	0.492682	6.57172e-33	4.52053e-31	516	516
RDH10	0.492649	6.64648e-33	4.55635e-31	516	516
CSDAP1	0.492196	7.73957e-33	5.28765e-31	516	516
MYO1G	0.491925	8.47523e-33	5.77063e-31	516	516
HSD3B7	0.491752	8.98083e-33	6.09422e-31	516	516
MTMR11	0.49128	1.05215e-32	7.11566e-31	516	516
IGF2BP2	0.490985	1.16146e-32	7.80238e-31	516	516
WEE1	0.49073	1.26462e-32	8.46707e-31	516	516
TUBA1C	0.490606	1.31805e-32	8.7698e-31	516	516
LMNA	0.490605	1.31857e-32	8.7698e-31	516	516
CD69	0.489806	1.72154e-32	1.14121e-30	516	516
C5AR1	0.489769	1.74267e-32	1.15142e-30	516	516
TEAD3	0.489469	1.92617e-32	1.26849e-30	516	516
ZDHHC5	0.489009	2.24416e-32	1.46351e-30	516	516
TM4SF1	0.488711	2.4779e-32	1.60552e-30	516	516
LCP2	0.48861	2.56243e-32	1.65495e-30	516	516
ZFP36L2	0.488466	2.68764e-32	1.72473e-30	516	516
CD248	0.488133	3.0018e-32	1.9202e-30	516	516
LOX	0.48676	4.72641e-32	2.99641e-30	516	516
HLA-DOA	0.486758	4.72897e-32	2.99641e-30	516	516
SNAI1	0.486654	4.89386e-32	3.09113e-30	516	516
HSPB1	0.485902	6.26968e-32	3.94773e-30	516	516
SERPINB1	0.485273	7.70992e-32	4.83942e-30	516	516
CFLAR	0.485023	8.36847e-32	5.22016e-30	516	516
SLC43A3	0.484868	8.80622e-32	5.47621e-30	516	516
FAM109B	0.484857	8.83892e-32	5.47958e-30	516	516
SUSD2	0.484153	1.11282e-31	6.85649e-30	516	516
CALU	0.483896	1.21032e-31	7.43442e-30	516	516
GPR82	0.483854	1.22719e-31	7.49222e-30	516	491
CALD1	0.483738	1.27452e-31	7.75759e-30	516	516
HCLS1	0.482915	1.66724e-31	1.01173e-29	516	516
VASN	0.482761	1.75283e-31	1.06046e-29	516	516
CFI	0.482641	1.8226e-31	1.09936e-29	516	516
MCAM	0.482607	1.84294e-31	1.1083e-29	516	516
RIPK1	0.482539	1.88442e-31	1.12986e-29	516	516
SLC30A7	0.482285	2.04643e-31	1.22335e-29	516	516
IGFBP7	0.481998	2.24665e-31	1.33906e-29	516	516
COL5A2	0.481544	2.6031e-31	1.5426e-29	516	516
LRRN4CL	0.481543	2.60351e-31	1.5426e-29	516	516
TPRG1	0.481368	2.75545e-31	1.62782e-29	516	512
FRRS1	0.481305	2.81244e-31	1.65662e-29	516	500
GPX8	0.48096	3.14546e-31	1.84198e-29	516	516
GPR3	0.480895	3.21225e-31	1.87562e-29	516	516
LDLRAD2	0.480804	3.30787e-31	1.92585e-29	516	516
EHD4	0.480722	3.39736e-31	1.97223e-29	516	516
RCAN1	0.480664	3.46134e-31	2.00359e-29	516	516
SIGLEC9	0.480473	3.68101e-31	2.12462e-29	516	516
PDLIM7	0.480119	4.12796e-31	2.37576e-29	516	516
TEAD4	0.479657	4.7901e-31	2.74897e-29	516	516
CYTIP	0.479546	4.96538e-31	2.84144e-29	516	516
COL1A1	0.479459	5.10686e-31	2.9141e-29	516	516
C17orf87	0.479355	5.28029e-31	3.00453e-29	516	516
COL6A3	0.479315	5.34879e-31	3.03491e-29	516	516
PLAT	0.47912	5.69532e-31	3.21338e-29	516	516
GNG5	0.479094	5.74288e-31	3.23113e-29	516	516
CA13	0.478962	5.99234e-31	3.36207e-29	516	516
ARF6	0.478887	6.13801e-31	3.43421e-29	516	516
GGT5	0.478863	6.18461e-31	3.45067e-29	516	516
BCL3	0.478663	6.59562e-31	3.66979e-29	516	516
MVP	0.478547	6.84723e-31	3.79927e-29	516	516
PYGL	0.478449	7.06548e-31	3.90957e-29	516	516
PCOLCE	0.478222	7.59855e-31	4.19298e-29	516	516
CARD16	0.478144	7.79213e-31	4.28802e-29	516	516
CASP8	0.477508	9.55336e-31	5.22858e-29	516	516
SWAP70	0.476808	1.19488e-30	6.50417e-29	516	516
ARAP3	0.476328	1.3922e-30	7.53741e-29	516	516
PTRF	0.47619	1.45523e-30	7.85749e-29	516	516
CLIC4	0.476149	1.47395e-30	7.93722e-29	516	516
SLA	0.476034	1.52909e-30	8.21209e-29	516	516
DYRK3	0.475772	1.66213e-30	8.90282e-29	516	516
PRICKLE3	0.475654	1.72577e-30	9.21908e-29	516	516
C9orf21	0.475318	1.92027e-30	1.02309e-28	516	516
ITPRIPL2	0.475139	2.03262e-30	1.07985e-28	516	516
TCIRG1	0.475131	2.03755e-30	1.07985e-28	516	516
RUNX3	0.475031	2.10348e-30	1.11186e-28	516	516
PTX3	0.474923	2.17686e-30	1.14762e-28	516	516
GPR65	0.474775	2.28129e-30	1.19953e-28	516	516
CTBS	0.474658	2.36792e-30	1.24183e-28	516	516
VWF	0.474447	2.53129e-30	1.32405e-28	516	516
CD58	0.474424	2.55021e-30	1.33048e-28	516	516
POSTN	0.474199	2.73776e-30	1.42095e-28	516	469
LILRB3	0.474071	2.85177e-30	1.47631e-28	516	514
TNFSF14	0.473734	3.17218e-30	1.63795e-28	516	369
IL1R2	0.473468	3.45039e-30	1.77704e-28	516	473
CCL2	0.472998	4.00167e-30	2.05569e-28	516	516
LRCH1	0.472887	4.14441e-30	2.12359e-28	516	516
SLC25A24	0.472602	4.53324e-30	2.31691e-28	516	516
CST7	0.47258	4.56437e-30	2.3269e-28	516	502
ERP44	0.472387	4.85079e-30	2.46666e-28	516	516
KLHL6	0.472343	4.91873e-30	2.49489e-28	516	516
IL6	0.472243	5.07496e-30	2.56765e-28	516	502
GALNT2	0.471939	5.58417e-30	2.81112e-28	516	516
TMEM154	0.471707	6.00707e-30	3.01645e-28	516	516
BCL2A1	0.471691	6.03682e-30	3.02383e-28	516	515
HLA-DQA1	0.471222	6.99351e-30	3.49432e-28	516	516
EMILIN2	0.470491	8.79252e-30	4.37145e-28	516	516
PTGER4	0.470162	9.745e-30	4.83304e-28	516	516
ENPP1	0.469632	1.14968e-29	5.67382e-28	516	516
CD164	0.469387	1.24095e-29	6.09429e-28	516	516
LY96	0.469302	1.27423e-29	6.24249e-28	516	516
MMP9	0.469163	1.33064e-29	6.4872e-28	516	499
BTN2A2	0.468996	1.40132e-29	6.81524e-28	516	516
PI4K2B	0.468876	1.45464e-29	7.05746e-28	516	516
CD44	0.468511	1.62948e-29	7.8867e-28	516	516
SLAMF6	0.468496	1.63731e-29	7.90551e-28	516	503
GBP5	0.468305	1.73729e-29	8.36817e-28	516	516
TREML2	0.468214	1.78717e-29	8.58784e-28	516	370
DENND2D	0.468078	1.86365e-29	8.93397e-28	516	515
CYP2S1	0.467977	1.92342e-29	9.17667e-28	516	516
WIPI1	0.467782	2.04283e-29	9.72327e-28	516	516
GLA	0.467744	2.06749e-29	9.81738e-28	516	516
ADPGK	0.467648	2.12997e-29	1.00902e-27	516	516
GPR171	0.467519	2.21664e-29	1.04761e-27	516	461
PDGFB	0.46745	2.26448e-29	1.06771e-27	516	516
FBXO39	0.467407	2.29487e-29	1.0795e-27	516	402
MICALL2	0.466432	3.10186e-29	1.4557e-27	516	516
OSTM1	0.466378	3.15385e-29	1.47665e-27	516	516
SGMS2	0.466148	3.38515e-29	1.57759e-27	516	516
FGL2	0.466107	3.42845e-29	1.59407e-27	516	516
PDPN	0.46586	3.69923e-29	1.71205e-27	516	516
CAPN5	0.465785	3.78634e-29	1.74833e-27	516	516
SERTAD3	0.465772	3.80124e-29	1.75118e-27	516	516
FAM114A1	0.465638	3.96089e-29	1.82056e-27	516	516
TMSL3	0.465411	4.2475e-29	1.94784e-27	516	516
ACTB	0.465348	4.33029e-29	1.98128e-27	516	516
SBNO2	0.465279	4.42312e-29	2.01915e-27	516	516
SYDE1	0.464411	5.77432e-29	2.60636e-27	516	516
RBM47	0.464323	5.93231e-29	2.67167e-27	516	516
FMOD	0.464199	6.1603e-29	2.76814e-27	516	516
ALOX5AP	0.46407	6.4087e-29	2.87333e-27	516	516
VIM	0.464023	6.5019e-29	2.90862e-27	516	516
FHOD1	0.46371	7.15569e-29	3.17985e-27	516	516
SEC24D	0.463648	7.29292e-29	3.23368e-27	516	516
FCGR3A	0.462878	9.22478e-29	4.08125e-27	516	516
SVIL	0.462835	9.34691e-29	4.1262e-27	516	516
GNS	0.462806	9.43018e-29	4.15383e-27	516	516
GCH1	0.46275	9.59258e-29	4.21612e-27	516	516
BCL10	0.462465	1.04611e-28	4.57781e-27	516	516
SPP1	0.462348	1.08413e-28	4.7339e-27	516	516
PPP1R3B	0.46195	1.22359e-28	5.31565e-27	516	516
DDB2	0.461913	1.23743e-28	5.35668e-27	516	516
ASB9	0.461866	1.25546e-28	5.42303e-27	516	515
MRC2	0.461851	1.26107e-28	5.43559e-27	516	516
HLA-DRB5	0.46182	1.27296e-28	5.47511e-27	516	516
PALM2-AKAP2	0.461807	1.27813e-28	5.48556e-27	516	516
VAV3	0.461705	1.3183e-28	5.64594e-27	516	516
HLA-DMA	0.461655	1.3384e-28	5.7198e-27	516	516
HGF	0.461644	1.34277e-28	5.7263e-27	516	516
EDEM2	0.46161	1.35704e-28	5.77489e-27	516	516
B4GALT1	0.46157	1.37354e-28	5.83277e-27	516	516
PTCRA	0.461497	1.40407e-28	5.94983e-27	516	487
RAB34	0.461117	1.57587e-28	6.66378e-27	516	516
SCPEP1	0.460912	1.67661e-28	7.07487e-27	516	516
KRT18	0.460771	1.74977e-28	7.36811e-27	516	505
ANGPT2	0.460594	1.84616e-28	7.75773e-27	516	516
PARP9	0.460331	1.99896e-28	8.36479e-27	516	516
APOBEC3C	0.459995	2.21257e-28	9.22027e-27	516	516
WISP1	0.459162	2.84509e-28	1.18071e-26	516	508
FABP5	0.459087	2.90953e-28	1.20496e-26	516	515
SIT1	0.458923	3.05673e-28	1.26332e-26	516	441
CIITA	0.458908	3.07102e-28	1.26662e-26	516	516
TRIM38	0.458518	3.45265e-28	1.41242e-26	516	516
CLEC4E	0.45838	3.599e-28	1.4693e-26	516	510
SLAMF1	0.457992	4.04457e-28	1.64452e-26	516	357
ARPC5	0.457908	4.14735e-28	1.6829e-26	516	516
TNFRSF10A	0.457837	4.2366e-28	1.71565e-26	516	514
CD96	0.457784	4.30414e-28	1.73949e-26	516	495
C19orf35	0.457514	4.66693e-28	1.87106e-26	516	516
UBASH3B	0.457396	4.83525e-28	1.93468e-26	516	516
NUCB1	0.457219	5.0983e-28	2.03469e-26	516	516
ESYT1	0.457214	5.10547e-28	2.03469e-26	516	516
RAC2	0.456957	5.514e-28	2.18882e-26	516	516
KCTD9	0.456843	5.70521e-28	2.26025e-26	516	516
ENG	0.456535	6.25461e-28	2.47303e-26	516	516
FHL3	0.456193	6.92612e-28	2.73316e-26	516	516
CTSA	0.456138	7.04061e-28	2.7729e-26	516	516
LAMA2	0.45612	7.08009e-28	2.78299e-26	516	516
KRT80	0.456009	7.31657e-28	2.87032e-26	516	381
RHOH	0.455696	8.03195e-28	3.14483e-26	516	516
RAB43	0.455316	8.99385e-28	3.5146e-26	516	516
DTX3L	0.455279	9.09263e-28	3.5463e-26	516	516
CHPF2	0.455235	9.21443e-28	3.58058e-26	516	516
WARS	0.454208	1.2497e-27	4.80871e-26	516	516
SLC26A2	0.45409	1.2942e-27	4.97042e-26	516	516
JAG1	0.453316	1.62715e-27	6.2135e-26	516	516
B2M	0.453114	1.72727e-27	6.58328e-26	516	516
TGFB2	0.453101	1.73391e-27	6.59608e-26	516	516
CDKN1A	0.453085	1.74229e-27	6.61545e-26	516	516
PLCE1	0.452804	1.89239e-27	7.17181e-26	516	516
ATP8B1	0.452743	1.92714e-27	7.28974e-26	516	516
FAM20A	0.452455	2.09758e-27	7.91953e-26	516	515
ACTN4	0.452439	2.10746e-27	7.94192e-26	516	516
PLA2G2A	0.45239	2.13813e-27	8.04239e-26	516	236
FAM83G	0.452331	2.17602e-27	8.16964e-26	516	475
NEXN	0.452051	2.36277e-27	8.8542e-26	516	516
C2	0.451832	2.52016e-27	9.40891e-26	516	516
S100A9	0.451776	2.5617e-27	9.54626e-26	516	516
GPR183	0.451596	2.70056e-27	1.00133e-25	516	516
TIFA	0.451564	2.7262e-27	1.00844e-25	516	516
LEPREL1	0.451253	2.98712e-27	1.1009e-25	516	516
LACTB	0.450668	3.54523e-27	1.29694e-25	516	516
ADAM9	0.450663	3.55073e-27	1.29694e-25	516	516
TPM3	0.450663	3.5513e-27	1.29694e-25	516	516
VNN2	0.450541	3.68045e-27	1.34166e-25	516	515
FAM159A	0.450331	3.91383e-27	1.42415e-25	516	513
MGST2	0.450239	4.02039e-27	1.46028e-25	516	516
RAB42	0.450204	4.06095e-27	1.47235e-25	516	516
ESM1	0.450052	4.24603e-27	1.53392e-25	516	494
LUM	0.449946	4.37937e-27	1.57924e-25	516	516
TNFRSF10C	0.449904	4.4332e-27	1.59579e-25	516	516
APOBEC3G	0.449745	4.64359e-27	1.66556e-25	516	516
APOB48R	0.449637	4.79256e-27	1.71592e-25	516	516
TRAM1	0.449577	4.87753e-27	1.74324e-25	516	516
MAP1LC3C	0.449563	4.89736e-27	1.74722e-25	516	476
MAPKAPK2	0.449221	5.41187e-27	1.92055e-25	516	516
SIGLEC5	0.449176	5.48212e-27	1.94204e-25	516	516
ZDHHC18	0.448861	6.00942e-27	2.12136e-25	516	516
IDO1	0.448705	6.28952e-27	2.21634e-25	516	300
COL3A1	0.44797	7.78643e-27	2.72946e-25	516	516
CD151	0.447615	8.63155e-27	3.00995e-25	516	516
IL2RG	0.447424	9.12157e-27	3.17532e-25	516	516
ZBTB42	0.447256	9.57739e-27	3.32822e-25	516	516
TGFBR2	0.447176	9.80034e-27	3.39982e-25	516	516
ANG	0.447168	9.82318e-27	3.40187e-25	516	515
ST8SIA4	0.44696	1.04329e-26	3.6068e-25	516	516
GCOM1	0.44684	1.08032e-26	3.72842e-25	516	516
C6orf145	0.446662	1.13728e-26	3.91826e-25	516	516
MOBKL1B	0.446298	1.26323e-26	4.34473e-25	516	516
LRRC25	0.44592	1.40883e-26	4.83724e-25	516	516
CCDC19	0.445892	1.42015e-26	4.86125e-25	516	478
NR4A3	0.445891	1.42067e-26	4.86125e-25	516	516
FRMD8	0.445803	1.457e-26	4.96863e-25	516	516
PROS1	0.445773	1.46964e-26	5.00324e-25	516	516
PALLD	0.445496	1.59171e-26	5.40965e-25	516	516
MS4A6A	0.445348	1.66104e-26	5.62626e-25	516	516
C10orf55	0.445338	1.66595e-26	5.63336e-25	516	488
CA3	0.445288	1.68989e-26	5.70287e-25	516	516
CXCR6	0.445188	1.7392e-26	5.85152e-25	516	473
C20orf26	0.44501	1.83083e-26	6.14951e-25	516	516
STEAP3	0.444626	2.04412e-26	6.85447e-25	516	516
ARL4C	0.444542	2.09402e-26	6.98678e-25	516	516
CXCR4	0.444374	2.19773e-26	7.32066e-25	516	516
BDKRB2	0.443856	2.54929e-26	8.44966e-25	516	513
LTBP2	0.443814	2.5804e-26	8.53869e-25	516	516
EMR1	0.44366	2.69632e-26	8.90674e-25	516	485
CTHRC1	0.443655	2.70049e-26	8.90674e-25	516	516
GLT25D1	0.443308	2.98196e-26	9.80287e-25	516	516
FSTL3	0.443287	3.00017e-26	9.84662e-25	516	516
RAB38	0.443239	3.04109e-26	9.96467e-25	516	514
ELTD1	0.443199	3.07639e-26	1.00635e-24	516	516
ZNF217	0.443193	3.08127e-26	1.00635e-24	516	516
LRRFIP1	0.442999	3.25736e-26	1.06213e-24	516	516
FZD6	0.442952	3.30095e-26	1.07286e-24	516	516
XBP1	0.442868	3.38099e-26	1.0971e-24	516	516
C3orf64	0.442826	3.42149e-26	1.10845e-24	516	516
GALNT4	0.442725	3.52235e-26	1.13929e-24	516	516
EHD2	0.44267	3.57722e-26	1.15518e-24	516	516
IFITM3	0.442641	3.60747e-26	1.16308e-24	516	516
B3GNT5	0.442221	4.06619e-26	1.30678e-24	516	516
CD3E	0.442158	4.14009e-26	1.3284e-24	516	502
DSE	0.442129	4.17384e-26	1.33709e-24	516	516
SPRY2	0.442062	4.25449e-26	1.36076e-24	516	516
NFKB1	0.441982	4.35223e-26	1.38981e-24	516	516
BCAT1	0.441895	4.46125e-26	1.42236e-24	516	516
CABP4	0.441581	4.87775e-26	1.55268e-24	516	514
TMEM214	0.441165	5.48966e-26	1.73646e-24	516	516
IGFBP5	0.441014	5.73053e-26	1.8098e-24	516	516
IKBIP	0.440763	6.15181e-26	1.93676e-24	516	516
NFAM1	0.440682	6.29472e-26	1.97865e-24	516	516
CD2	0.440541	6.55207e-26	2.05312e-24	516	502
HLA-E	0.440365	6.88628e-26	2.15448e-24	516	516
KDELR1	0.440299	7.01596e-26	2.19164e-24	516	516
HLA-DQB2	0.440217	7.1801e-26	2.23943e-24	516	481
HLA-B	0.440052	7.52456e-26	2.34323e-24	516	516
S1PR3	0.439463	8.88619e-26	2.76297e-24	516	516
CASP7	0.439213	9.53633e-26	2.95597e-24	516	516
ACTR3	0.439057	9.96296e-26	3.08345e-24	516	516
FERMT3	0.43899	1.01535e-25	3.1376e-24	516	516
GZMK	0.438976	1.01948e-25	3.14552e-24	516	447
OSTC	0.438632	1.12296e-25	3.44362e-24	516	516
CD302	0.438163	1.28147e-25	3.91776e-24	516	516
TNFRSF1B	0.438144	1.28832e-25	3.93271e-24	516	516
IL1RN	0.437757	1.43608e-25	4.3771e-24	516	514
SLC1A5	0.437098	1.72726e-25	5.24869e-24	516	516
SH2B3	0.436595	1.98839e-25	6.03304e-24	516	516
ACAP1	0.436473	2.05725e-25	6.23258e-24	516	516
APOL1	0.436436	2.0785e-25	6.28747e-24	516	516
FCGBP	0.436333	2.13942e-25	6.46202e-24	516	516
TPST1	0.436117	2.27238e-25	6.83043e-24	516	516
APOL4	0.436113	2.27499e-25	6.83043e-24	516	516
CDK2	0.436093	2.2875e-25	6.84749e-24	516	516
LAMB2	0.436078	2.29715e-25	6.86616e-24	516	516
BCL2L12	0.435845	2.45155e-25	7.28428e-24	516	516
BTG3	0.435511	2.69076e-25	7.98324e-24	516	516
CD276	0.435404	2.77235e-25	8.18904e-24	516	516
CXCL9	0.435319	2.83848e-25	8.35979e-24	516	508
ACTA2	0.434998	3.10321e-25	9.11272e-24	516	516
NUDT16P1	0.434944	3.1507e-25	9.23869e-24	516	516
C13orf33	0.434938	3.15583e-25	9.24025e-24	516	506
OLFML3	0.434628	3.43985e-25	1.00572e-23	516	516
TNKS1BP1	0.434516	3.54856e-25	1.03599e-23	516	516
C1QB	0.434367	3.69749e-25	1.07791e-23	516	516
HMOX1	0.434301	3.7665e-25	1.09643e-23	516	516
SHISA5	0.434067	4.01906e-25	1.16826e-23	516	516
MYBPH	0.433954	4.14617e-25	1.20173e-23	516	479
HLA-DQA2	0.433907	4.20063e-25	1.21576e-23	516	511
SPINT1	0.433897	4.21319e-25	1.21764e-23	516	516
CYP19A1	0.433716	4.42957e-25	1.27834e-23	516	513
ARHGDIB	0.43355	4.6377e-25	1.33648e-23	516	516
APOBEC3F	0.43352	4.67626e-25	1.34567e-23	516	516
MAFK	0.433361	4.88634e-25	1.4021e-23	516	516
SP6	0.433255	5.03166e-25	1.44174e-23	516	516
F2RL2	0.433043	5.33472e-25	1.5264e-23	516	511
SOAT1	0.433003	5.39374e-25	1.54109e-23	516	516
LOXL1	0.432907	5.53955e-25	1.5805e-23	516	516
PODNL1	0.432556	6.10185e-25	1.73355e-23	516	516
ETF1	0.432501	6.19514e-25	1.75757e-23	516	516
SSR3	0.432426	6.32622e-25	1.79222e-23	516	516
FCGR2B	0.432086	6.94705e-25	1.96533e-23	516	515
CD274	0.432066	6.98535e-25	1.97339e-23	516	511
TXNDC5	0.432047	7.02089e-25	1.98064e-23	516	516
NSUN7	0.431906	7.29838e-25	2.05315e-23	516	516
HTRA3	0.431767	7.58398e-25	2.12754e-23	516	515
LYZ	0.431688	7.75001e-25	2.17108e-23	516	516
STX3	0.431155	8.97159e-25	2.50283e-23	516	516
KDELR2	0.430919	9.574e-25	2.66348e-23	516	516
PVRL2	0.430648	1.03115e-24	2.86468e-23	516	516
TNC	0.430495	1.07531e-24	2.98323e-23	516	516
P2RY8	0.430461	1.08534e-24	3.00693e-23	516	515
IL7R	0.430432	1.09398e-24	3.02668e-23	516	477
SH3TC1	0.430308	1.13188e-24	3.12721e-23	516	516
FAM26F	0.430206	1.16366e-24	3.21062e-23	516	516
MR1	0.430093	1.20027e-24	3.30707e-23	516	516
CLEC12A	0.430055	1.21271e-24	3.33679e-23	516	431
PDIA3	0.429937	1.25256e-24	3.43701e-23	516	516
BTBD19	0.429906	1.26314e-24	3.46133e-23	516	515
HLA-DQB1	0.429827	1.29078e-24	3.53224e-23	516	516
MXRA5	0.429379	1.45882e-24	3.98666e-23	516	516
CATSPERB	0.42934	1.47436e-24	4.02365e-23	516	165
ABI3	0.429274	1.50106e-24	4.09095e-23	516	516
C1orf85	0.429228	1.52031e-24	4.13779e-23	516	516
C21orf63	0.429174	1.54287e-24	4.19352e-23	516	516
OSM	0.42911	1.56999e-24	4.26146e-23	516	514
DENND3	0.429088	1.57924e-24	4.28078e-23	516	516
CXCL10	0.428936	1.64597e-24	4.45566e-23	516	512
PROCR	0.428814	1.70182e-24	4.60063e-23	516	516
S100A8	0.428699	1.75596e-24	4.74063e-23	516	514
PIGT	0.428488	1.85968e-24	5.01391e-23	516	516
NAPSB	0.427698	2.30467e-24	6.14761e-23	516	515
IL15	0.42759	2.3732e-24	6.30531e-23	516	515
CMAH	0.427556	2.3956e-24	6.35641e-23	516	516
ST14	0.427356	2.52891e-24	6.70129e-23	516	516
ANXA5	0.427202	2.63663e-24	6.97752e-23	516	516
C1orf38	0.427188	2.64675e-24	6.99508e-23	516	516
F2RL3	0.427131	2.68769e-24	7.09395e-23	516	504
CDSN	0.427039	2.75599e-24	7.26468e-23	516	484
FXYD5	0.426961	2.81479e-24	7.40995e-23	516	516
PIK3R5	0.42683	2.91621e-24	7.65686e-23	516	516
CMTM6	0.426794	2.94477e-24	7.72176e-23	516	516
IL2RB	0.426757	2.97415e-24	7.78862e-23	516	515
ELK3	0.426495	3.19238e-24	8.32755e-23	516	516
COLEC12	0.426419	3.25848e-24	8.48895e-23	516	516
SOCS1	0.426308	3.35827e-24	8.7263e-23	516	516
P4HA2	0.42607	3.58097e-24	9.25705e-23	516	516
NOX4	0.426065	3.586e-24	9.25816e-23	516	516
LAP3	0.426056	3.59414e-24	9.26726e-23	516	516
NFKBIZ	0.425966	3.6832e-24	9.48472e-23	516	516
IL1RAP	0.425772	3.88075e-24	9.98062e-23	516	516
CFB	0.425632	4.0302e-24	1.03385e-22	516	516
VAMP5	0.42549	4.18694e-24	1.07132e-22	516	516
TLR8	0.42541	4.27864e-24	1.09339e-22	516	514
P4HA3	0.425087	4.66639e-24	1.18644e-22	516	510
CD3G	0.425068	4.69034e-24	1.19103e-22	516	354
PSMC2	0.424928	4.87008e-24	1.23511e-22	516	516
B3GNT7	0.424826	5.00569e-24	1.2679e-22	516	516
EPSTI1	0.424527	5.42465e-24	1.36884e-22	516	516
SPATS2L	0.424494	5.47302e-24	1.37931e-22	516	516
ANKRD22	0.424412	5.59511e-24	1.40831e-22	516	513
HLA-C	0.424137	6.02319e-24	1.5085e-22	516	516
CXCL1	0.424113	6.06255e-24	1.51647e-22	516	512
RELL1	0.424056	6.15541e-24	1.53778e-22	516	516
RPGR	0.424013	6.22728e-24	1.5538e-22	516	516
FLII	0.42385	6.50541e-24	1.61918e-22	516	516
GJC1	0.4238	6.59171e-24	1.6366e-22	516	516
PLEKHA9	0.423785	6.61874e-24	1.64128e-22	516	516
DSG2	0.423643	6.87591e-24	1.70086e-22	516	458
SLC25A25	0.423485	7.17238e-24	1.77201e-22	516	516
TMBIM1	0.423164	7.81558e-24	1.92382e-22	516	516
PQLC3	0.42289	8.40782e-24	2.06202e-22	516	516
ABHD15	0.422688	8.87495e-24	2.17393e-22	516	516
IFITM2	0.422554	9.19808e-24	2.25034e-22	516	516
RPS6KA3	0.42234	9.73723e-24	2.37934e-22	516	516
IL28RA	0.4223	9.84274e-24	2.4022e-22	516	516
HLA-A	0.422262	9.94228e-24	2.42061e-22	516	516
VNN1	0.4221	1.03818e-23	2.52151e-22	516	511
PTPN12	0.421838	1.11309e-23	2.69693e-22	516	516
SPPL2A	0.421796	1.12558e-23	2.72063e-22	516	516
CCRL2	0.421782	1.12961e-23	2.72709e-22	516	516
SFN	0.421714	1.15041e-23	2.77345e-22	516	493
LRRC15	0.421354	1.26583e-23	3.04132e-22	516	396
CAPZA1	0.421316	1.27878e-23	3.06877e-22	516	516
ITGA1	0.421279	1.29139e-23	3.09163e-22	516	516
PTGER2	0.420952	1.40832e-23	3.36356e-22	516	474
ENPEP	0.420883	1.43454e-23	3.41806e-22	516	516
COTL1	0.420832	1.45406e-23	3.46045e-22	516	516
CD7	0.42075	1.48588e-23	3.52783e-22	516	515
CTSS	0.420609	1.54269e-23	3.65838e-22	516	516
TRIP10	0.420427	1.61858e-23	3.83381e-22	516	516
PDIA3P	0.420394	1.63311e-23	3.86368e-22	516	516
FLNC	0.419753	1.93465e-23	4.57169e-22	516	516
LTF	0.419625	2.00117e-23	4.72333e-22	516	514
UBASH3A	0.419564	2.03354e-23	4.79409e-22	516	353
EVC2	0.419468	2.08613e-23	4.91231e-22	516	515
PDLIM4	0.419449	2.09619e-23	4.93021e-22	516	516
CD40LG	0.419411	2.11729e-23	4.97402e-22	516	364
TBC1D10C	0.418953	2.3895e-23	5.59387e-22	516	516
GLB1	0.418932	2.40273e-23	5.6183e-22	516	516
DTX2	0.418507	2.68731e-23	6.26186e-22	516	516
TMSB10	0.418203	2.91051e-23	6.75843e-22	516	516
GSTK1	0.418056	3.02539e-23	7.01069e-22	516	516
SYTL3	0.41799	3.07859e-23	7.12403e-22	516	516
CEBPG	0.417674	3.34491e-23	7.7048e-22	516	516
PTPN9	0.417508	3.4934e-23	8.03761e-22	516	516
SPON2	0.417498	3.50272e-23	8.04984e-22	516	516
PRKCH	0.417489	3.5114e-23	8.06058e-22	516	516
SLC15A4	0.417455	3.54213e-23	8.12183e-22	516	516
RELB	0.417264	3.7247e-23	8.52099e-22	516	516
C1orf87	0.417143	3.84446e-23	8.78496e-22	516	412
HSPA5	0.417078	3.90983e-23	8.92419e-22	516	516
CNN3	0.417056	3.93242e-23	8.95609e-22	516	516
CLEC7A	0.417053	3.93624e-23	8.95609e-22	516	516
SIGLEC10	0.417052	3.93718e-23	8.95609e-22	516	516
CNIH4	0.416981	4.01093e-23	9.10502e-22	516	516
FAM177B	0.41698	4.01172e-23	9.10502e-22	516	500
RUNX2	0.416966	4.02684e-23	9.12902e-22	516	516
EPHA1	0.416954	4.03906e-23	9.14639e-22	516	435
DIRAS3	0.416829	4.1732e-23	9.43952e-22	516	516
DCBLD2	0.416619	4.40929e-23	9.96232e-22	516	516
SLC7A7	0.416165	4.96411e-23	1.11782e-21	516	516
PDCD1LG2	0.416116	5.02868e-23	1.13109e-21	516	515
LOC151534	0.415942	5.2619e-23	1.1809e-21	516	516
KCNE4	0.415907	5.30991e-23	1.19034e-21	516	516
IL15RA	0.415685	5.62682e-23	1.25998e-21	516	516
FPR1	0.415618	5.7263e-23	1.28083e-21	516	516
IBSP	0.415517	5.8792e-23	1.31357e-21	516	337
NEK6	0.415389	6.07806e-23	1.35649e-21	516	516
PRIC285	0.41516	6.45085e-23	1.43649e-21	516	516
APCDD1L	0.4148	7.08467e-23	1.57414e-21	516	351
TRIB1	0.414702	7.26722e-23	1.61292e-21	516	516
FPR2	0.414679	7.31028e-23	1.6189e-21	516	493
NCF1	0.414569	7.52253e-23	1.66394e-21	516	516
CTSZ	0.414565	7.53022e-23	1.66394e-21	516	516
PDIA4	0.414462	7.73379e-23	1.70704e-21	516	516
IL13RA1	0.414449	7.76051e-23	1.71106e-21	516	516
SULT1B1	0.414405	7.84897e-23	1.72736e-21	516	480
CD97	0.414404	7.85164e-23	1.72736e-21	516	516
ERI1	0.414112	8.46889e-23	1.85705e-21	516	516
CDC42EP3	0.414099	8.49797e-23	1.8614e-21	516	516
FBP1	0.413985	8.75182e-23	1.91491e-21	516	516
BATF	0.413969	8.78911e-23	1.92098e-21	516	512
P4HB	0.413905	8.93623e-23	1.95101e-21	516	516
NAGA	0.413836	9.09637e-23	1.98382e-21	516	516
PKIB	0.413466	1.00126e-22	2.18126e-21	516	516
IL7	0.413417	1.01401e-22	2.20666e-21	516	513
GPR141	0.413335	1.03556e-22	2.25112e-21	516	396
RGS13	0.413312	1.04175e-22	2.26213e-21	516	274
APOBEC3D	0.413266	1.05422e-22	2.28672e-21	516	516
IL2RA	0.413231	1.06378e-22	2.30498e-21	516	344
IRAK2	0.413226	1.0654e-22	2.306e-21	516	516
PRF1	0.412989	1.1325e-22	2.44858e-21	516	515
GNG12	0.412752	1.20405e-22	2.60048e-21	516	516
SOD3	0.412733	1.20987e-22	2.60744e-21	516	516
LYN	0.412684	1.2254e-22	2.63809e-21	516	516
NGFR	0.412665	1.23135e-22	2.64807e-21	516	516
PRG2	0.412574	1.26055e-22	2.70796e-21	516	379
TRAT1	0.412459	1.29861e-22	2.78674e-21	516	321
AKAP12	0.412441	1.30457e-22	2.79655e-21	516	516
HLA-H	0.412359	1.33232e-22	2.84994e-21	516	516
FES	0.412347	1.33664e-22	2.85615e-21	516	516
DDOST	0.412063	1.43818e-22	3.06658e-21	516	516
PDGFA	0.411833	1.52583e-22	3.24316e-21	516	516
AOX1	0.411406	1.70294e-22	3.61195e-21	516	512
GGCX	0.411345	1.72963e-22	3.66469e-21	516	516
KLHDC7B	0.41128	1.75902e-22	3.71961e-21	516	514
CD68	0.411279	1.75925e-22	3.71961e-21	516	516
ITGA7	0.411202	1.79454e-22	3.79023e-21	516	516
PTGIR	0.410936	1.92116e-22	4.04492e-21	516	514
TBC1D1	0.410815	1.98178e-22	4.16818e-21	516	516
COQ10B	0.410547	2.12286e-22	4.46023e-21	516	516
HLA-F	0.410317	2.25161e-22	4.72086e-21	516	516
HK3	0.410119	2.36853e-22	4.95566e-21	516	516
CCDC46	0.409943	2.47769e-22	5.17327e-21	516	516
LGALS1	0.40993	2.48556e-22	5.18432e-21	516	516
GUSB	0.40991	2.49846e-22	5.20581e-21	516	516
NFE2L3	0.409798	2.57114e-22	5.3517e-21	516	516
GPX1	0.409782	2.5812e-22	5.36707e-21	516	516
COL14A1	0.409499	2.775e-22	5.76409e-21	516	516
DPEP1	0.409332	2.89578e-22	6.00255e-21	516	465
HERPUD1	0.409126	3.05201e-22	6.31336e-21	516	516
TTC26	0.409087	3.08222e-22	6.36929e-21	516	516
GTF2E2	0.409054	3.10827e-22	6.41653e-21	516	516
CCR4	0.408523	3.55906e-22	7.29461e-21	516	284
COL15A1	0.408364	3.70579e-22	7.57989e-21	516	516
HLA-DMB	0.408353	3.71566e-22	7.58463e-21	516	516
C1QA	0.408296	3.76981e-22	7.68736e-21	516	516
C9orf167	0.408276	3.78988e-22	7.71701e-21	516	516
CREM	0.408272	3.79331e-22	7.71701e-21	516	516
IGF2BP3	0.408269	3.79588e-22	7.71701e-21	516	516
MXRA7	0.408172	3.89106e-22	7.90252e-21	516	516
ACTG2	0.408118	3.94513e-22	8.00423e-21	516	504
TNFAIP6	0.408052	4.01165e-22	8.13097e-21	516	515
PXN	0.407921	4.14672e-22	8.39627e-21	516	516
CLEC2B	0.407753	4.32821e-22	8.72856e-21	516	516
LOC283314	0.407653	4.43911e-22	8.94323e-21	516	512
CECR1	0.407555	4.55042e-22	9.15828e-21	516	516
LAMC3	0.407382	4.75476e-22	9.55998e-21	516	516
CXCR3	0.407344	4.80137e-22	9.64404e-21	516	428
MMP14	0.407312	4.83989e-22	9.7117e-21	516	516
ITGA10	0.407071	5.14443e-22	1.02919e-20	516	516
TMEM165	0.407047	5.17526e-22	1.03433e-20	516	516
PICALM	0.406991	5.25039e-22	1.0483e-20	516	516
ERP27	0.406787	5.52827e-22	1.1016e-20	516	512
CCL5	0.406753	5.57601e-22	1.11001e-20	516	516
ALDH3B1	0.406731	5.60723e-22	1.11512e-20	516	516
SNTB2	0.406646	5.7287e-22	1.13815e-20	516	516
MFSD1	0.406574	5.8345e-22	1.15802e-20	516	516
CTTNBP2NL	0.406508	5.93229e-22	1.17627e-20	516	516
PARP15	0.406214	6.38991e-22	1.26576e-20	516	497
GCLM	0.406105	6.56813e-22	1.2985e-20	516	516
CDH11	0.406051	6.65795e-22	1.31496e-20	516	516
ARHGAP29	0.405852	7.00022e-22	1.37985e-20	516	516
ATF5	0.405632	7.39876e-22	1.45555e-20	516	516
TAGLN	0.405626	7.41027e-22	1.45639e-20	516	516
CAPG	0.405559	7.53609e-22	1.47967e-20	516	516
SPATA17	0.405476	7.6964e-22	1.50967e-20	516	515
NPNT	0.405307	8.03002e-22	1.57357e-20	516	516
LAMP3	0.405262	8.12131e-22	1.58991e-20	516	516
LAIR1	0.405226	8.19578e-22	1.60137e-20	516	516
FAM26E	0.405041	8.58557e-22	1.67427e-20	516	516
EN1	0.405031	8.60736e-22	1.67689e-20	516	415
GZMH	0.404969	8.744e-22	1.70186e-20	516	457
CCL7	0.40489	8.91949e-22	1.73266e-20	516	116
LGALS3BP	0.404884	8.93113e-22	1.73324e-20	516	516
PLAC8	0.404716	9.31624e-22	1.80276e-20	516	507
RFTN1	0.404539	9.74077e-22	1.88309e-20	516	516
CD3D	0.404415	1.00474e-21	1.9405e-20	516	413
HPD	0.404385	1.01234e-21	1.95329e-20	516	445
FBXO32	0.404366	1.01739e-21	1.96116e-20	516	516
PLOD1	0.404172	1.06804e-21	2.05484e-20	516	516
RNASE4	0.404007	1.11299e-21	2.13724e-20	516	516
TWISTNB	0.403956	1.12747e-21	2.16092e-20	516	516
CPVL	0.403859	1.15517e-21	2.20979e-20	516	516
HLX	0.403846	1.15903e-21	2.21506e-20	516	516
CAMK2D	0.403794	1.17398e-21	2.23654e-20	516	516
CAP1	0.403792	1.17455e-21	2.23654e-20	516	516
RILPL2	0.403792	1.17472e-21	2.23654e-20	516	516
MUC1	0.403748	1.18779e-21	2.25713e-20	516	516
PMM2	0.40343	1.286e-21	2.43527e-20	516	516
LGALS3	0.403395	1.29741e-21	2.45385e-20	516	516
LEPRE1	0.40339	1.29893e-21	2.4544e-20	516	516
SLA2	0.403124	1.38844e-21	2.61861e-20	516	515
FGFRL1	0.403066	1.40842e-21	2.65322e-20	516	516
COL12A1	0.40306	1.4108e-21	2.65332e-20	516	516
TAP1	0.402948	1.45057e-21	2.723e-20	516	516
SAA1	0.402876	1.47714e-21	2.77029e-20	516	224
NLRC5	0.402656	1.56036e-21	2.91819e-20	516	516
RAB32	0.402158	1.76652e-21	3.28844e-20	516	516
TGFB1I1	0.402069	1.80619e-21	3.35919e-20	516	516
G0S2	0.401869	1.8983e-21	3.52723e-20	516	509
SH3BGRL3	0.401859	1.90305e-21	3.53278e-20	516	516
TNFSF12-TNFSF13	0.401823	1.92017e-21	3.56127e-20	516	417
PLXND1	0.401803	1.92964e-21	3.57552e-20	516	516
CD70	0.401684	1.98758e-21	3.67611e-20	516	331
DOK3	0.401639	2.00999e-21	3.71413e-20	516	516
ZNF600	0.401537	2.06168e-21	3.80616e-20	516	516
VGLL3	0.401353	2.15815e-21	3.97694e-20	516	516
MX2	0.401339	2.16549e-21	3.9868e-20	516	516
TFPI2	0.401298	2.18764e-21	4.02348e-20	516	485
SLC35A2	0.401215	2.23342e-21	4.09684e-20	516	516
IER5L	0.401111	2.29155e-21	4.19199e-20	516	516
C1orf54	0.401028	2.33953e-21	4.27302e-20	516	516
DAP	0.401027	2.3401e-21	4.27302e-20	516	516
CASP5	0.401016	2.34658e-21	4.28097e-20	516	431
MICB	0.40098	2.36739e-21	4.315e-20	516	516
NMI	0.400797	2.47728e-21	4.50712e-20	516	516
CPA4	0.400759	2.50096e-21	4.54608e-20	516	488
ARPC1B	0.400741	2.51166e-21	4.56142e-20	516	516
MREG	0.400577	2.61629e-21	4.7343e-20	516	516
TRPV2	0.400524	2.65092e-21	4.78834e-20	516	516
HOXC6	0.400485	2.67645e-21	4.83012e-20	516	313
TMEM43	0.400426	2.71568e-21	4.89651e-20	516	516
C1QC	0.400284	2.81284e-21	5.06714e-20	516	516
LRG1	0.40028	2.81553e-21	5.06744e-20	516	516
TMEM8A	0.400185	2.88259e-21	5.1835e-20	516	516
ICOS	0.39976	3.20227e-21	5.75321e-20	516	337
STAT1	0.399639	3.29887e-21	5.92146e-20	516	516
LDHA	0.399544	3.37695e-21	6.04001e-20	516	516
IL1RL1	0.399532	3.38731e-21	6.05316e-20	516	442
PTPRC	0.39947	3.4394e-21	6.14078e-20	516	516
IL18RAP	0.399453	3.45359e-21	6.16064e-20	516	481
ARHGAP15	0.399312	3.57615e-21	6.36796e-20	516	516
PTPN6	0.399295	3.59171e-21	6.39e-20	516	516
BST1	0.39918	3.6943e-21	6.5667e-20	516	516
CDC42EP5	0.399161	3.71146e-21	6.59137e-20	516	516
SEPN1	0.399094	3.77382e-21	6.6962e-20	516	516
IL18	0.399032	3.8318e-21	6.79308e-20	516	516
KLF17	0.398888	3.96992e-21	7.01935e-20	516	489
MGAT4B	0.398368	4.51243e-21	7.95058e-20	516	516
LRRC8E	0.398334	4.55008e-21	8.0099e-20	516	510
RASSF5	0.398211	4.68942e-21	8.23354e-20	516	516
RAP1B	0.39806	4.86669e-21	8.53732e-20	516	516
SLC10A6	0.398018	4.91715e-21	8.61831e-20	516	459
TRIM22	0.397926	5.03016e-21	8.80871e-20	516	516
SIPA1	0.397865	5.10579e-21	8.92559e-20	516	516
FCRL6	0.397613	5.43053e-21	9.48502e-20	516	487
CASP1	0.397554	5.51075e-21	9.61675e-20	516	516
GNGT2	0.39737	5.76419e-21	1.00242e-19	516	516
C6orf150	0.397281	5.89184e-21	1.02351e-19	516	515
UNC93B1	0.397278	5.89568e-21	1.02351e-19	516	516
NPC2	0.397132	6.10984e-21	1.05978e-19	516	516
CHST2	0.39704	6.25008e-21	1.08223e-19	516	516
G6PD	0.396892	6.47981e-21	1.12008e-19	516	516
ELL2	0.396878	6.50154e-21	1.12287e-19	516	516
MGAT1	0.396588	6.97989e-21	1.20445e-19	516	516
VEGFA	0.396584	6.98644e-21	1.20455e-19	516	516
UCN2	0.396568	7.01424e-21	1.2083e-19	516	449
KLF10	0.396471	7.18191e-21	1.23612e-19	516	516
PLB1	0.396305	7.47886e-21	1.28503e-19	516	516
RHOC	0.396284	7.51829e-21	1.2907e-19	516	516
PIM3	0.3961	7.86271e-21	1.34868e-19	516	516
ZNF436	0.396096	7.8711e-21	1.34897e-19	516	516
BATF3	0.395966	8.12451e-21	1.38884e-19	516	516
GSDMD	0.395645	8.78505e-21	1.50048e-19	516	516
XKR8	0.395309	9.53453e-21	1.62573e-19	516	516
ALOX15B	0.39529	9.57771e-21	1.6317e-19	516	508
ZCCHC9	0.394953	1.0396e-20	1.76478e-19	516	516
ALOX5	0.39495	1.04028e-20	1.76478e-19	516	516
2020-09-15	0.394901	1.05293e-20	1.78474e-19	516	516
SIGLEC7	0.394659	1.11657e-20	1.89101e-19	516	515
IFI16	0.394607	1.13086e-20	1.91359e-19	516	516
SH3GLB1	0.394579	1.13849e-20	1.92489e-19	516	516
GFI1	0.394367	1.19841e-20	2.0245e-19	516	511
TMEM61	0.39433	1.20934e-20	2.04125e-19	516	398
LILRA6	0.39417	1.25715e-20	2.12016e-19	516	514
NAB2	0.394151	1.26288e-20	2.12625e-19	516	516
DUSP6	0.394018	1.30449e-20	2.19442e-19	516	516
TXLNA	0.394014	1.30555e-20	2.19442e-19	516	516
BIRC3	0.393976	1.31765e-20	2.2129e-19	516	516
ANPEP	0.393962	1.32227e-20	2.21881e-19	516	516
C3orf52	0.393891	1.34493e-20	2.25495e-19	516	478
OCIAD2	0.393645	1.4277e-20	2.38973e-19	516	516
PYHIN1	0.393556	1.45875e-20	2.43968e-19	516	377
ACSL1	0.393257	1.56798e-20	2.62018e-19	516	516
MT1L	0.393224	1.58071e-20	2.63705e-19	516	515
RNF135	0.393172	1.60055e-20	2.66794e-19	516	516
SPRY4	0.393167	1.60238e-20	2.66878e-19	516	516
NOD1	0.393082	1.63549e-20	2.72166e-19	516	516
EGR2	0.393013	1.66301e-20	2.76517e-19	516	516
SERPINB9	0.392905	1.70711e-20	2.83615e-19	516	516
P2RY10	0.392725	1.78287e-20	2.95468e-19	516	297
GZMA	0.392637	1.82108e-20	3.01552e-19	516	479
DOK2	0.392612	1.83211e-20	3.03128e-19	516	516
CD180	0.392332	1.96016e-20	3.23515e-19	516	516
C10orf81	0.392274	1.98766e-20	3.27785e-19	516	434
CEACAM4	0.392199	2.02352e-20	3.33424e-19	516	482
TLN1	0.392173	2.03631e-20	3.35257e-19	516	516
2020-09-09	0.392114	2.06555e-20	3.39792e-19	516	516
IL10RB	0.39205	2.09782e-20	3.44819e-19	516	516
RNASE2	0.39197	2.13851e-20	3.5122e-19	516	515
DPP9	0.391913	2.16795e-20	3.55763e-19	516	516
CCR2	0.391807	2.22408e-20	3.64416e-19	516	471
JAK3	0.391806	2.2243e-20	3.64416e-19	516	516
FURIN	0.391718	2.27208e-20	3.7194e-19	516	516
FCER1G	0.391598	2.33813e-20	3.8244e-19	516	516
OR51E1	0.391555	2.36244e-20	3.86101e-19	516	405
CSRNP1	0.391542	2.36999e-20	3.8702e-19	516	516
GMFG	0.391449	2.4236e-20	3.95454e-19	516	516
HDAC7	0.391356	2.4781e-20	4.04018e-19	516	516
CP	0.391185	2.58222e-20	4.20312e-19	516	516
RNASE6	0.390844	2.80198e-20	4.55713e-19	516	516
TIPARP	0.39084	2.8051e-20	4.55851e-19	516	516
DDX60L	0.390835	2.80782e-20	4.55924e-19	516	516
TRIM21	0.390665	2.92489e-20	4.74168e-19	516	516
KIAA0247	0.39065	2.93551e-20	4.75506e-19	516	516
NCF1B	0.390598	2.97223e-20	4.80291e-19	516	514
CITED1	0.39026	3.22256e-20	5.19907e-19	516	516
SPINK8	0.390074	3.369e-20	5.43096e-19	516	460
WTAP	0.389925	3.49147e-20	5.61936e-19	516	516
LCTL	0.389902	3.51024e-20	5.64504e-19	516	512
C9orf47	0.389871	3.53655e-20	5.68282e-19	516	516
COL18A1	0.389859	3.54624e-20	5.69382e-19	516	516
SUMF1	0.389606	3.76746e-20	6.02973e-19	516	516
HS3ST3B1	0.389584	3.78745e-20	6.04727e-19	516	450
DERL2	0.389544	3.82341e-20	6.09985e-19	516	516
FZD5	0.389297	4.05532e-20	6.46469e-19	516	516
NTAN1	0.389236	4.11519e-20	6.54974e-19	516	516
KLRD1	0.38908	4.27064e-20	6.78639e-19	516	506
PGM2	0.389049	4.30243e-20	6.83152e-19	516	516
GNLY	0.388976	4.37758e-20	6.94534e-19	516	514
IGFBP1	0.388751	4.61851e-20	7.31028e-19	516	506
CYBA	0.388698	4.67723e-20	7.39739e-19	516	516
PTGFRN	0.388623	4.76184e-20	7.51936e-19	516	516
A2M	0.38842	4.99712e-20	7.87851e-19	516	516
LCP1	0.388122	5.36273e-20	8.42846e-19	516	516
LMO2	0.388114	5.37372e-20	8.43914e-19	516	516
RIPK3	0.388026	5.48675e-20	8.60991e-19	516	516
TRPM4	0.387982	5.54376e-20	8.69258e-19	516	516
GPR157	0.387955	5.58066e-20	8.74361e-19	516	424
HCP5	0.387915	5.63341e-20	8.81251e-19	516	516
ELN	0.387902	5.65008e-20	8.82623e-19	516	516
IER2	0.387865	5.70082e-20	8.89718e-19	516	516
STK17A	0.38776	5.84426e-20	9.11395e-19	516	516
PRR24	0.387702	5.92476e-20	9.23233e-19	516	516
CASP6	0.387685	5.94836e-20	9.26192e-19	516	516
TCF7	0.387643	6.00829e-20	9.34798e-19	516	516
EDEM1	0.387157	6.7418e-20	1.04649e-18	516	516
C1orf162	0.386557	7.76937e-20	1.2032e-18	516	516
RGS19	0.386537	7.80475e-20	1.20775e-18	516	516
KLRB1	0.386476	7.91861e-20	1.22443e-18	516	419
SDF4	0.386287	8.28052e-20	1.2794e-18	516	516
MYCBP	0.386276	8.30074e-20	1.28154e-18	516	516
HOXC10	0.386042	8.77183e-20	1.35323e-18	516	286
ALPK3	0.386029	8.79821e-20	1.35626e-18	516	516
C3orf36	0.385975	8.91126e-20	1.37263e-18	516	390
IRGM	0.385754	9.38801e-20	1.44055e-18	516	256
TMED9	0.38572	9.46265e-20	1.45089e-18	516	516
PLS3	0.385658	9.60349e-20	1.47136e-18	516	516
CLEC1A	0.385612	9.70698e-20	1.48609e-18	516	516
TXNDC3	0.385543	9.86589e-20	1.50926e-18	516	354
DNASE1L1	0.385367	1.02836e-19	1.57077e-18	516	516
SEC61A1	0.385325	1.03854e-19	1.58511e-18	516	516
CD300A	0.385209	1.06729e-19	1.62653e-18	516	516
LOC400759	0.385142	1.08406e-19	1.65083e-18	516	507
CCR5	0.385121	1.08962e-19	1.65804e-18	516	516
CD79B	0.385094	1.09639e-19	1.66708e-18	516	510
SMC5	0.384965	1.13007e-19	1.7157e-18	516	516
RNF19B	0.384891	1.15007e-19	1.74473e-18	516	516
SLAIN2	0.384808	1.1726e-19	1.7749e-18	516	516
ALDH3A1	0.384594	1.23301e-19	1.86493e-18	516	497
C7orf68	0.384554	1.24468e-19	1.88117e-18	516	516
CCNYL1	0.384542	1.24819e-19	1.88504e-18	516	516
AEBP1	0.384464	1.27104e-19	1.91811e-18	516	516
HS2ST1	0.384316	1.31589e-19	1.98431e-18	516	516
CARD6	0.38428	1.32716e-19	1.99979e-18	516	516
HFE	0.384114	1.37972e-19	2.07433e-18	516	516
ANTXR2	0.383845	1.46946e-19	2.20594e-18	516	516
CTSW	0.383764	1.49751e-19	2.24311e-18	516	512
NRBP1	0.383764	1.49756e-19	2.24311e-18	516	516
PROC	0.383682	1.5266e-19	2.2849e-18	516	505
MECOM	0.383658	1.53501e-19	2.29406e-18	516	516
HEXA	0.383459	1.60809e-19	2.4015e-18	516	516
LOC400696	0.383396	1.63207e-19	2.43369e-18	516	295
PSME4	0.383332	1.65646e-19	2.46822e-18	516	516
ECM2	0.383222	1.69978e-19	2.53089e-18	516	516
GPSM3	0.383078	1.75799e-19	2.61303e-18	516	516
MYADM	0.383075	1.75884e-19	2.61303e-18	516	516
LOC257358	0.382932	1.81868e-19	2.69594e-18	516	497
SFRP4	0.382657	1.93929e-19	2.8705e-18	516	516
ODF3L1	0.382578	1.97505e-19	2.92126e-18	516	479
HOXA1	0.382556	1.98535e-19	2.93434e-18	516	449
C7orf57	0.382453	2.03325e-19	3.00293e-18	516	497
LCK	0.382317	2.0986e-19	3.09489e-18	516	508
SAMD9L	0.382282	2.116e-19	3.11827e-18	516	516
GRAP2	0.38216	2.17698e-19	3.20577e-18	516	512
UBC	0.382141	2.18645e-19	3.21737e-18	516	516
GBGT1	0.38212	2.19723e-19	3.23086e-18	516	516
TMEM109	0.381992	2.26347e-19	3.32582e-18	516	516
PARP14	0.381846	2.34172e-19	3.43829e-18	516	516
HOXA5	0.381761	2.38844e-19	3.50432e-18	516	294
TWF2	0.381626	2.46437e-19	3.61309e-18	516	516
SMC4	0.381427	2.58105e-19	3.76765e-18	516	516
OTP	0.381377	2.6112e-19	3.80337e-18	516	346
TTF2	0.380825	2.96704e-19	4.31543e-18	516	516
RNF144B	0.380746	3.02226e-19	4.39255e-18	516	516
POM121L9P	0.380671	3.07473e-19	4.46558e-18	516	516
MAP3K8	0.380502	3.19767e-19	4.63408e-18	516	516
PDK3	0.380402	3.27227e-19	4.73227e-18	516	516
C7orf42	0.380402	3.27249e-19	4.73227e-18	516	516
ZNF295	0.380263	3.37965e-19	4.88372e-18	516	516
KIAA1949	0.379946	3.63592e-19	5.24272e-18	516	516
RBPMS	0.379773	3.78385e-19	5.44429e-18	516	516
TMED10	0.379695	3.8528e-19	5.53557e-18	516	516
SLFN12	0.379364	4.15826e-19	5.95316e-18	516	516
ALPK1	0.379192	4.32605e-19	6.18896e-18	516	516
PFN1	0.379157	4.36146e-19	6.23518e-18	516	516
GRN	0.379142	4.37578e-19	6.2512e-18	516	516
CTNNA1	0.378909	4.61761e-19	6.58264e-18	516	516
COL13A1	0.378586	4.97278e-19	7.05888e-18	516	499
SPI1	0.378571	4.9896e-19	7.07776e-18	516	516
C11orf21	0.378216	5.41422e-19	7.66925e-18	516	505
PTGS1	0.378114	5.54142e-19	7.82932e-18	516	516
NEAT1	0.378018	5.66565e-19	7.99721e-18	516	516
MYO1F	0.377928	5.78347e-19	8.15778e-18	516	516
MYD88	0.377837	5.90592e-19	8.32466e-18	516	516
OAS2	0.377765	6.00412e-19	8.45713e-18	516	516
TWSG1	0.377608	6.22367e-19	8.75411e-18	516	516
ATP2A3	0.377475	6.41506e-19	9.0107e-18	516	516
ITGB2	0.377419	6.49871e-19	9.12181e-18	516	516
SMS	0.377346	6.60784e-19	9.2685e-18	516	516
RRAS	0.377234	6.7799e-19	9.49659e-18	516	516
SIRPG	0.377143	6.92169e-19	9.68844e-18	516	398
INMT	0.377114	6.96844e-19	9.74707e-18	516	515
PTPN1	0.377076	7.02793e-19	9.82346e-18	516	516
PLEKHG1	0.376934	7.26045e-19	1.01344e-17	516	516
HSP90B1	0.376763	7.54978e-19	1.05236e-17	516	516
PARVG	0.376715	7.6332e-19	1.06251e-17	516	516
SYNC	0.376701	7.65638e-19	1.065e-17	516	516
MAN1C1	0.376658	7.73203e-19	1.07478e-17	516	516
NAGS	0.376534	7.9542e-19	1.10413e-17	516	516
AFF1	0.376456	8.09812e-19	1.12178e-17	516	516
CD48	0.376265	8.45843e-19	1.17089e-17	516	513
HOXB3	0.376123	8.73571e-19	1.20761e-17	516	495
TBX19	0.375921	9.1469e-19	1.26271e-17	516	516
HIC1	0.3759	9.19054e-19	1.26787e-17	516	516
TBXAS1	0.375814	9.37192e-19	1.292e-17	516	516
GPR132	0.375488	1.00943e-18	1.38872e-17	516	516
HOXA4	0.375464	1.01489e-18	1.39528e-17	516	374
CPM	0.375213	1.07443e-18	1.47512e-17	516	516
STXBP2	0.37518	1.08255e-18	1.48424e-17	516	516
SPN	0.375083	1.10663e-18	1.51622e-17	516	516
SLC35F5	0.375053	1.11419e-18	1.52554e-17	516	516
DNAH11	0.374977	1.13356e-18	1.55101e-17	516	504
VAMP8	0.374836	1.17046e-18	1.59823e-17	516	516
SP140	0.374804	1.17901e-18	1.60796e-17	516	516
ADIPOR1	0.374737	1.19697e-18	1.62998e-17	516	516
TNFRSF14	0.374729	1.19902e-18	1.63168e-17	516	516
ASPN	0.37449	1.26593e-18	1.71923e-17	516	515
ARFGAP3	0.374328	1.31319e-18	1.78101e-17	516	516
C15orf48	0.374248	1.33711e-18	1.811e-17	516	482
CD109	0.374232	1.34209e-18	1.81653e-17	516	516
GPNMB	0.374222	1.34508e-18	1.81935e-17	516	516
CD101	0.374178	1.35846e-18	1.83618e-17	516	516
FUCA1	0.373935	1.43511e-18	1.93331e-17	516	516
C20orf30	0.373855	1.46132e-18	1.9673e-17	516	516
EXOC3L2	0.373681	1.51991e-18	2.04374e-17	516	485
TPK1	0.373638	1.53475e-18	2.06201e-17	516	516
VSTM1	0.373484	1.58908e-18	2.13073e-17	516	261
REEP4	0.373392	1.62241e-18	2.17107e-17	516	516
SLC2A3	0.373312	1.65208e-18	2.20931e-17	516	516
CEP135	0.373227	1.68403e-18	2.25053e-17	516	516
CCL20	0.373213	1.68951e-18	2.25635e-17	516	413
SSFA2	0.373164	1.7079e-18	2.2794e-17	516	516
SIRPB2	0.373046	1.75429e-18	2.33975e-17	516	516
SLC2A9	0.372965	1.78633e-18	2.37932e-17	516	516
C6orf115	0.372916	1.80637e-18	2.40442e-17	516	516
RPSAP52	0.372898	1.8137e-18	2.41258e-17	516	198
OSR2	0.372774	1.8649e-18	2.47905e-17	516	418
BCAS4	0.372767	1.86782e-18	2.48129e-17	516	516
TYROBP	0.372721	1.88722e-18	2.5054e-17	516	516
CXCL11	0.372639	1.92233e-18	2.55032e-17	516	495
IER5	0.372546	1.96329e-18	2.60123e-17	516	516
MT1A	0.372488	1.98883e-18	2.63333e-17	516	489
ETV7	0.372387	2.03464e-18	2.69221e-17	516	514
FTL	0.372164	2.13897e-18	2.82468e-17	516	516
CD86	0.372027	2.20594e-18	2.9112e-17	516	516
PSRC1	0.371953	2.24315e-18	2.95642e-17	516	516
ADAM6	0.37191	2.26481e-18	2.98302e-17	516	515
CSF2RB	0.371885	2.27776e-18	2.99811e-17	516	516
AK2	0.371653	2.3993e-18	3.14982e-17	516	516
TXK	0.371586	2.43559e-18	3.1933e-17	516	408
MKNK2	0.371491	2.48809e-18	3.26e-17	516	516
CD4	0.371445	2.51365e-18	3.29134e-17	516	516
FAS	0.371312	2.58948e-18	3.38842e-17	516	516
TMTC3	0.371221	2.643e-18	3.45396e-17	516	516
SDCBP	0.371126	2.70008e-18	3.52625e-17	516	516
C19orf40	0.370986	2.78588e-18	3.62652e-17	516	516
EOMES	0.370733	2.94778e-18	3.82983e-17	516	420
SLC12A7	0.370533	3.08247e-18	3.99707e-17	516	516
IRS2	0.370521	3.0909e-18	4.00541e-17	516	516
NCF2	0.370466	3.12933e-18	4.05259e-17	516	516
SAA2	0.370417	3.16356e-18	4.09428e-17	516	290
NCF1C	0.370337	3.22037e-18	4.16512e-17	516	513
CREB3L2	0.370316	3.23562e-18	4.17947e-17	516	516
TXLNB	0.370088	3.40478e-18	4.39514e-17	516	516
CTSL1	0.369967	3.49741e-18	4.51182e-17	516	516
C12orf5	0.3698	3.63052e-18	4.67453e-17	516	516
HOXA3	0.369727	3.69028e-18	4.74843e-17	516	283
KCNJ15	0.369662	3.74418e-18	4.8147e-17	516	457
TMEM159	0.36957	3.82102e-18	4.91037e-17	516	516
UACA	0.369356	4.0078e-18	5.1471e-17	516	516
C16orf54	0.369136	4.20903e-18	5.39979e-17	516	516
CCR3	0.369066	4.2746e-18	5.47574e-17	516	318
ACPP	0.36904	4.29964e-18	5.50431e-17	516	505
ANKRD53	0.368798	4.53656e-18	5.78916e-17	516	516
HEBP2	0.368754	4.58165e-18	5.84298e-17	516	516
CMTM7	0.368395	4.96096e-18	6.3107e-17	516	516
S100A2	0.368355	5.00542e-18	6.36322e-17	516	515
LILRA5	0.368349	5.01209e-18	6.36767e-17	516	450
ULK4	0.368147	5.2421e-18	6.64308e-17	516	516
NKG7	0.368141	5.2486e-18	6.64713e-17	516	512
ORMDL2	0.368101	5.29466e-18	6.69279e-17	516	516
VCL	0.367977	5.44308e-18	6.87176e-17	516	516
KCNN4	0.367917	5.51519e-18	6.95842e-17	516	516
FAM43A	0.367907	5.52713e-18	6.96911e-17	516	516
HRH1	0.367837	5.61343e-18	7.06462e-17	516	516
MS4A4A	0.367819	5.63596e-18	7.08854e-17	516	516
FAM91A1	0.367639	5.86547e-18	7.36797e-17	516	516
FKBP9	0.36744	6.1294e-18	7.6947e-17	516	516
S100A10	0.367384	6.20596e-18	7.77623e-17	516	516
KHNYN	0.36724	6.40549e-18	8.01624e-17	516	516
SERPINF1	0.367061	6.66381e-18	8.33313e-17	516	516
SLC17A9	0.367058	6.66856e-18	8.33313e-17	516	516
LAPTM5	0.367053	6.6753e-18	8.33313e-17	516	516
PPIC	0.367037	6.69892e-18	8.35742e-17	516	516
ERGIC1	0.366947	6.83392e-18	8.52055e-17	516	516
IL10RA	0.366905	6.89784e-18	8.59491e-17	516	516
EDN1	0.366862	6.96391e-18	8.67186e-17	516	516
TMOD3	0.366847	6.98605e-18	8.69404e-17	516	516
CD5	0.366681	7.24628e-18	9.00673e-17	516	506
HOXB2	0.366535	7.48368e-18	9.29605e-17	516	506
RIN1	0.366486	7.56436e-18	9.39046e-17	516	516
ZC3HAV1	0.366344	7.80523e-18	9.67753e-17	516	516
OLFML2A	0.366213	8.03379e-18	9.9425e-17	516	516
SGSH	0.366031	8.36248e-18	1.03302e-16	516	516
RHOQ	0.365989	8.43955e-18	1.0419e-16	516	516
TMEM106C	0.365943	8.52545e-18	1.05121e-16	516	516
GDF5	0.36581	8.77847e-18	1.08174e-16	516	515
SIL1	0.365698	8.99705e-18	1.108e-16	516	516
SLC25A37	0.365439	9.52294e-18	1.17133e-16	516	516
DNAJC3	0.365357	9.69559e-18	1.1911e-16	516	516
KRT75	0.36529	9.84021e-18	1.20813e-16	516	250
TFEC	0.365226	9.97939e-18	1.22447e-16	516	516
TOR1B	0.365055	1.03589e-17	1.26871e-16	516	516
RGS3	0.364901	1.07142e-17	1.31063e-16	516	516
FAM111A	0.36489	1.07404e-17	1.31303e-16	516	516
C5orf32	0.364811	1.09296e-17	1.33535e-16	516	516
SSC5D	0.364764	1.10417e-17	1.34823e-16	516	516
DMP1	0.364675	1.12583e-17	1.373e-16	516	321
PAWR	0.36467	1.12718e-17	1.37382e-16	516	516
IKBKE	0.364639	1.13471e-17	1.38215e-16	516	516
XIRP1	0.364541	1.15948e-17	1.41062e-16	516	515
SLC47A2	0.364344	1.21044e-17	1.47172e-16	516	514
B3GALNT2	0.364328	1.21471e-17	1.47602e-16	516	516
KANK2	0.364181	1.25423e-17	1.52312e-16	516	516
CNN1	0.364123	1.27018e-17	1.54156e-16	516	515
ATP1B3	0.36392	1.32793e-17	1.60776e-16	516	516
LOC100130776	0.363856	1.34666e-17	1.62946e-16	516	516
LRRC32	0.363797	1.36386e-17	1.64928e-16	516	516
FCGRT	0.363727	1.38513e-17	1.67298e-16	516	516
MFAP4	0.363701	1.39278e-17	1.68121e-16	516	516
TCEA3	0.363649	1.40871e-17	1.69942e-16	516	516
PPAP2A	0.363312	1.51627e-17	1.82698e-16	516	516
FCGR3B	0.363308	1.51741e-17	1.82725e-16	516	509
APOL6	0.363215	1.54857e-17	1.86255e-16	516	516
PARP12	0.363197	1.55446e-17	1.86852e-16	516	516
CD2AP	0.36312	1.58099e-17	1.89814e-16	516	516
MS4A7	0.363105	1.58596e-17	1.90296e-16	516	516
C11orf63	0.36309	1.59134e-17	1.90714e-16	516	516
MOBKL2C	0.363015	1.61726e-17	1.9359e-16	516	516
C3AR1	0.362954	1.63907e-17	1.96083e-16	516	516
USP53	0.362888	1.66287e-17	1.98812e-16	516	516
ARPC3	0.362864	1.67123e-17	1.99574e-16	516	516
PPP1CB	0.362818	1.68809e-17	2.01468e-16	516	516
ARHGAP30	0.362808	1.69195e-17	2.01808e-16	516	516
PTPN2	0.362229	1.91862e-17	2.27762e-16	516	516
CELSR1	0.36212	1.96469e-17	2.32956e-16	516	516
ADM2	0.361943	2.04129e-17	2.41753e-16	516	512
ICAM4	0.361919	2.05224e-17	2.42907e-16	516	502
OSCAR	0.361853	2.08159e-17	2.46236e-16	516	516
TAP2	0.361773	2.11791e-17	2.5009e-16	516	516
IFI44	0.361629	2.18487e-17	2.57392e-16	516	516
BICD1	0.361485	2.25412e-17	2.65394e-16	516	516
CD300LF	0.36144	2.2761e-17	2.67825e-16	516	516
SPHK1	0.361355	2.31863e-17	2.7267e-16	516	516
MGC12916	0.361325	2.33379e-17	2.74292e-16	516	407
SILV	0.361195	2.39999e-17	2.81742e-16	516	506
ANO9	0.361105	2.44755e-17	2.86823e-16	516	372
MFSD7	0.3611	2.45026e-17	2.86974e-16	516	516
MYL12B	0.36108	2.46074e-17	2.88033e-16	516	516
CCR7	0.36107	2.46615e-17	2.88498e-16	516	507
SHOX2	0.361057	2.47276e-17	2.89103e-16	516	433
GVIN1	0.361052	2.47533e-17	2.89192e-16	516	516
HOXB4	0.361008	2.49899e-17	2.9166e-16	516	442
PDE6G	0.360983	2.51248e-17	2.93064e-16	516	514
SPRED2	0.360895	2.56107e-17	2.98559e-16	516	516
CRLF3	0.360892	2.56269e-17	2.98575e-16	516	516
RRBP1	0.360802	2.613e-17	3.04083e-16	516	516
NAT1	0.360627	2.71339e-17	3.15582e-16	516	516
SLC37A2	0.3604	2.84989e-17	3.30311e-16	516	516
SLC4A7	0.360294	2.91543e-17	3.37622e-16	516	516
TRIP6	0.360293	2.91633e-17	3.37622e-16	516	516
IGFBP4	0.360261	2.93613e-17	3.39718e-16	516	516
LOC647946	0.360186	2.98431e-17	3.44895e-16	516	348
CD53	0.36009	3.04668e-17	3.51497e-16	516	516
IKZF3	0.35992	3.16027e-17	3.64184e-16	516	365
SLC16A5	0.35984	3.21461e-17	3.70021e-16	516	516
PSMB8	0.359671	3.33426e-17	3.83354e-16	516	516
PVR	0.359522	3.44282e-17	3.95157e-16	516	516
SPAG4	0.359177	3.70758e-17	4.2385e-16	516	506
PLEK	0.359171	3.71214e-17	4.24129e-16	516	516
EIF4G1	0.359062	3.80004e-17	4.3368e-16	516	516
C19orf59	0.359039	3.81901e-17	4.35589e-16	516	259
DNAJB11	0.359007	3.84476e-17	4.37789e-16	516	516
SP110	0.359003	3.84873e-17	4.37991e-16	516	516
TNFRSF19	0.35898	3.86727e-17	4.39853e-16	516	516
AURKAPS1	0.35897	3.87581e-17	4.40574e-16	516	513
PGCP	0.358936	3.90388e-17	4.43514e-16	516	516
PLOD3	0.358752	4.0612e-17	4.60866e-16	516	516
KMO	0.358544	4.24657e-17	4.81536e-16	516	500
PSMD12	0.358317	4.45782e-17	5.04734e-16	516	516
MMRN1	0.358161	4.60935e-17	5.21303e-16	516	515
GLIS3	0.358149	4.62073e-17	5.22296e-16	516	516
SEMA3F	0.357834	4.94229e-17	5.57702e-16	516	516
ERF	0.357661	5.12913e-17	5.7846e-16	516	516
MT2A	0.357621	5.17306e-17	5.83086e-16	516	516
TCTEX1D1	0.35733	5.50435e-17	6.19039e-16	516	513
CDH5	0.357326	5.50917e-17	6.19234e-16	516	516
PALMD	0.357269	5.57596e-17	6.26391e-16	516	516
MMP10	0.357249	5.60037e-17	6.2843e-16	516	225
CALHM2	0.357016	5.88478e-17	6.58872e-16	516	516
TCTN1	0.356912	6.01666e-17	6.72888e-16	516	516
IL18BP	0.356625	6.39574e-17	7.1436e-16	516	516
STAT5A	0.356623	6.39816e-17	7.1436e-16	516	516
TRAF5	0.356569	6.47326e-17	7.21943e-16	516	516
SDC1	0.356554	6.49274e-17	7.23714e-16	516	516
BST2	0.356531	6.52507e-17	7.26914e-16	516	516
C10orf11	0.356439	6.65413e-17	7.4047e-16	516	516
SH2D1A	0.356416	6.68604e-17	7.43609e-16	516	488
IRF7	0.356199	7.00185e-17	7.77442e-16	516	516
RCSD1	0.356103	7.14571e-17	7.92538e-16	516	516
TM9SF1	0.356078	7.18496e-17	7.96013e-16	516	516
CUBN	0.356046	7.23355e-17	8.00954e-16	516	516
HES1	0.356012	7.28583e-17	8.06298e-16	516	516
KCNE3	0.355907	7.45017e-17	8.23578e-16	516	516
CD300C	0.355883	7.48786e-17	8.27289e-16	516	516
TMEM107	0.355833	7.56825e-17	8.35252e-16	516	516
TLR1	0.355825	7.5804e-17	8.36133e-16	516	516
RASSF8	0.355746	7.7097e-17	8.49928e-16	516	516
DLK1	0.355521	8.08588e-17	8.90423e-16	516	338
TBX21	0.355449	8.20998e-17	9.03592e-16	516	509
TMEM92	0.355379	8.33279e-17	9.16607e-16	516	498
NFATC2	0.355213	8.62962e-17	9.47184e-16	516	513
ULBP3	0.355149	8.74834e-17	9.59689e-16	516	490
TXNDC12	0.355111	8.81966e-17	9.66985e-16	516	516
PXDNL	0.355065	8.90563e-17	9.75347e-16	516	515
HOXC9	0.35491	9.20255e-17	1.00567e-15	516	207
MEFV	0.354779	9.45988e-17	1.03211e-15	516	513
PVT1	0.354725	9.56828e-17	1.04337e-15	516	515
APOBEC3H	0.354719	9.58015e-17	1.0441e-15	516	477
PION	0.3547	9.62056e-17	1.04752e-15	516	516
SLC16A12	0.354699	9.62203e-17	1.04752e-15	516	502
ARSJ	0.354546	9.93742e-17	1.0801e-15	516	516
KRT7	0.354529	9.97295e-17	1.08338e-15	516	441
GGT8P	0.354477	1.00837e-16	1.09482e-15	516	387
GPX7	0.354373	1.03078e-16	1.11855e-15	516	516
ZDHHC12	0.354194	1.07031e-16	1.16082e-15	516	516
STEAP4	0.354145	1.08156e-16	1.17175e-15	516	513
MED8	0.354088	1.09468e-16	1.18532e-15	516	516
HLA-DRB6	0.353993	1.11679e-16	1.20862e-15	516	508
TRAM2	0.353927	1.13231e-16	1.22409e-15	516	516
BAX	0.353896	1.13969e-16	1.2314e-15	516	516
HAVCR2	0.353659	1.19819e-16	1.29392e-15	516	516
VKORC1	0.353593	1.21501e-16	1.31138e-15	516	516
BCL2L1	0.353542	1.22808e-16	1.32477e-15	516	516
OLFML2B	0.353441	1.25425e-16	1.35227e-15	516	516
SQSTM1	0.353392	1.26747e-16	1.36579e-15	516	516
KDELC2	0.353348	1.27915e-16	1.3769e-15	516	516
ABCB4	0.353097	1.34851e-16	1.45079e-15	516	516
RHBDF2	0.352977	1.38292e-16	1.48621e-15	516	516
XCL2	0.352844	1.422e-16	1.52576e-15	516	273
RPS2P32	0.352767	1.44528e-16	1.54908e-15	516	516
RPN1	0.352697	1.4667e-16	1.57121e-15	516	516
CLEC18B	0.352605	1.49503e-16	1.6007e-15	516	516
WASF2	0.352377	1.56823e-16	1.67639e-15	516	516
HOXD11	0.352274	1.60252e-16	1.71214e-15	516	199
INHBA	0.352231	1.61706e-16	1.72676e-15	516	516
ARPC2	0.352144	1.64683e-16	1.75761e-15	516	516
PARVB	0.352135	1.65007e-16	1.75989e-15	516	516
ZC3H12D	0.352133	1.65072e-16	1.75989e-15	516	516
ITGAL	0.352044	1.68149e-16	1.79175e-15	516	516
SH2D3A	0.351949	1.71551e-16	1.82606e-15	516	469
CD247	0.351763	1.78355e-16	1.89648e-15	516	516
ZNRF2	0.351699	1.80734e-16	1.91974e-15	516	516
P2RY6	0.351645	1.82792e-16	1.93955e-15	516	516
B3GNT8	0.351413	1.91877e-16	2.03487e-15	516	515
TEC	0.351392	1.92702e-16	2.04254e-15	516	514
FAM176B	0.351309	1.96091e-16	2.07737e-15	516	516
TTYH3	0.351284	1.97128e-16	2.08725e-15	516	516
SH3PXD2B	0.351196	2.0078e-16	2.1248e-15	516	516
MYL9	0.351167	2.01988e-16	2.13645e-15	516	516
FAM126A	0.351089	2.05299e-16	2.17034e-15	516	516
DNAJC10	0.351066	2.06284e-16	2.17961e-15	516	516
HSH2D	0.350782	2.18851e-16	2.30631e-15	516	507
PDIA6	0.350716	2.21912e-16	2.33612e-15	516	516
C9orf44	0.350622	2.26303e-16	2.3811e-15	516	316
ABCA13	0.350587	2.27936e-16	2.39703e-15	516	507
ICAM3	0.350572	2.28662e-16	2.40341e-15	516	516
LXN	0.350516	2.3135e-16	2.43039e-15	516	516
FGFR1	0.350488	2.32668e-16	2.44295e-15	516	516
PDZK1IP1	0.350438	2.35102e-16	2.46593e-15	516	472
PHTF1	0.35033	2.40447e-16	2.52042e-15	516	516
EFEMP2	0.350311	2.41426e-16	2.5283e-15	516	516
FAM38A	0.350183	2.47955e-16	2.59397e-15	516	516
ASL	0.350179	2.48157e-16	2.59474e-15	516	516
EVI2B	0.350071	2.53797e-16	2.65232e-15	516	516
GPR55	0.350012	2.56894e-16	2.68329e-15	516	513
TRIM56	0.35	2.57522e-16	2.68845e-15	516	516
SMAGP	0.34999	2.58109e-16	2.69316e-15	516	516
RDH5	0.349957	2.59834e-16	2.70837e-15	516	516
F3	0.349891	2.63472e-16	2.74486e-15	516	516
ALG2	0.349654	2.76728e-16	2.877e-15	516	516
PLEKHA2	0.349642	2.77417e-16	2.88267e-15	516	516
CHIC2	0.349427	2.90068e-16	3.01257e-15	516	516
FCN3	0.3494	2.91707e-16	3.02802e-15	516	476
PSMB9	0.349277	2.99228e-16	3.10288e-15	516	516
HSPA1B	0.349257	3.00469e-16	3.11254e-15	516	516
GALNT3	0.349227	3.02324e-16	3.13015e-15	516	516
ARHGAP9	0.349188	3.04812e-16	3.15428e-15	516	516
MFAP2	0.349026	3.15187e-16	3.25493e-15	516	508
ITGA11	0.348749	3.33788e-16	3.44348e-15	516	516
DAPP1	0.348688	3.3807e-16	3.48587e-15	516	516
ULBP1	0.348654	3.40441e-16	3.50852e-15	516	496
FCHSD1	0.348635	3.41742e-16	3.52012e-15	516	516
ITPRIPL1	0.348609	3.43629e-16	3.53774e-15	516	516
PDIA5	0.348586	3.45284e-16	3.55296e-15	516	516
WBSCR26	0.348547	3.48058e-16	3.57966e-15	516	220
LOC441294	0.348475	3.53288e-16	3.62788e-15	516	453
LOXL4	0.348387	3.59722e-16	3.69019e-15	516	515
TGFB1	0.348257	3.69502e-16	3.78664e-15	516	516
EHBP1L1	0.348254	3.69729e-16	3.78703e-15	516	516
RASSF1	0.348098	3.8187e-16	3.90541e-15	516	516
HLA-G	0.348066	3.84418e-16	3.92747e-15	516	516
ECSCR	0.348047	3.85923e-16	3.94085e-15	516	516
C19orf10	0.34789	3.98608e-16	4.06625e-15	516	516
H19	0.347705	4.14091e-16	4.21991e-15	516	515
BCL6B	0.347675	4.16686e-16	4.2442e-15	516	516
APOL2	0.347438	4.37498e-16	4.45392e-15	516	516
OMP	0.346899	4.88856e-16	4.9667e-15	516	262
SLC27A3	0.34686	4.92764e-16	5.00387e-15	516	516
TMEM37	0.346846	4.94189e-16	5.01581e-15	516	516
PPM1M	0.346816	4.97255e-16	5.04437e-15	516	516
MAN2B1	0.346687	5.10532e-16	5.17123e-15	516	516
ARHGAP25	0.346655	5.13979e-16	5.20352e-15	516	516
MYL6	0.346647	5.14814e-16	5.20935e-15	516	516
VENTX	0.346614	5.1829e-16	5.24188e-15	516	515
APOC2	0.346523	5.28085e-16	5.33289e-15	516	516
ZCCHC6	0.346387	5.4304e-16	5.47566e-15	516	516
RBP1	0.34629	5.53861e-16	5.57917e-15	516	516
LOC100216001	0.346141	5.71082e-16	5.74399e-15	516	363
TMEM194B	0.346111	5.74578e-16	5.77626e-15	516	516
SLC2A14	0.346078	5.785e-16	5.81278e-15	516	514
KRT23	0.346019	5.85494e-16	5.88012e-15	516	317
SLC15A3	0.346008	5.86867e-16	5.89096e-15	516	516
ROR2	0.345869	6.03869e-16	6.05859e-15	516	515
CAPNS1	0.345822	6.09708e-16	6.11107e-15	516	516
GYS1	0.345749	6.18848e-16	6.19647e-15	516	516
DHH	0.345746	6.19154e-16	6.19647e-15	516	501
SEPHS2	0.345653	6.31091e-16	6.30965e-15	516	516
RNASET2	0.345649	6.3164e-16	6.312e-15	516	516
HLA-DPB2	0.345488	6.52779e-16	6.51752e-15	516	434
OASL	0.345487	6.52945e-16	6.51752e-15	516	516
CMTM3	0.345368	6.68956e-16	6.65181e-15	516	516
SIGLEC14	0.345227	6.88561e-16	6.83998e-15	516	498
TLR3	0.344958	7.27418e-16	7.2117e-15	516	516
CHPF	0.344869	7.40658e-16	7.33573e-15	516	516
C11orf24	0.344614	7.80201e-16	7.72357e-15	516	516
TEAD2	0.34459	7.84134e-16	7.75867e-15	516	516
FAM105B	0.344479	8.01958e-16	7.91554e-15	516	516
MBD4	0.344467	8.03987e-16	7.93167e-15	516	516
RHOJ	0.344399	8.15147e-16	8.03782e-15	516	516
IL4I1	0.344268	8.37232e-16	8.25155e-15	516	516
TMED5	0.344262	8.382e-16	8.25704e-15	516	516
ORAI2	0.344233	8.43238e-16	8.30258e-15	516	516
TNNI2	0.344134	8.60432e-16	8.46359e-15	516	482
AMICA1	0.344022	8.80295e-16	8.65473e-15	516	516
ARSD	0.343944	8.94313e-16	8.78825e-15	516	516
SLC30A5	0.343682	9.43095e-16	9.245e-15	516	516
C1orf88	0.343509	9.76989e-16	9.56791e-15	516	516
TMEM70	0.34346	9.86695e-16	9.65356e-15	516	516
CD40	0.343395	9.99835e-16	9.7726e-15	516	516
LMAN2	0.343381	1.00269e-15	9.7957e-15	516	516
NRP1	0.343272	1.02508e-15	9.99992e-15	516	516
FYCO1	0.34314	1.05283e-15	1.02656e-14	516	516
NCSTN	0.343103	1.06079e-15	1.03382e-14	516	516
TRADD	0.343086	1.06434e-15	1.03677e-14	516	516
TRIM5	0.342957	1.09253e-15	1.06269e-14	516	516
ZNF267	0.342759	1.13734e-15	1.10521e-14	516	516
PLXNB2	0.342738	1.14216e-15	1.10882e-14	516	516
HOXA6	0.342647	1.1633e-15	1.12825e-14	516	148
PTGS2	0.342565	1.18281e-15	1.14607e-14	516	516
AP1S3	0.342562	1.18354e-15	1.14622e-14	516	516
RIOK3	0.342247	1.26154e-15	1.22117e-14	516	516
YIPF1	0.342169	1.28147e-15	1.23986e-14	516	516
PLEKHG6	0.342139	1.28935e-15	1.24689e-14	516	457
ABCD1	0.342055	1.31122e-15	1.26743e-14	516	516
C20orf72	0.342037	1.31608e-15	1.27151e-14	516	516
ROR1	0.341839	1.36982e-15	1.32153e-14	516	514
HPS3	0.341434	1.48642e-15	1.42785e-14	516	516
C2CD4B	0.341408	1.49406e-15	1.4345e-14	516	475
MARVELD1	0.341335	1.51639e-15	1.45524e-14	516	516
NLRP6	0.341103	1.5889e-15	1.52264e-14	516	431
CBFB	0.341025	1.6138e-15	1.54577e-14	516	516
DSC2	0.340904	1.65371e-15	1.58324e-14	516	516
SHKBP1	0.340853	1.67069e-15	1.59873e-14	516	516
ZSCAN5A	0.340811	1.68482e-15	1.61142e-14	516	516
C15orf54	0.340809	1.68555e-15	1.61142e-14	516	174
RPN2	0.340775	1.69713e-15	1.62172e-14	516	516
NBEAL2	0.340686	1.72781e-15	1.65025e-14	516	516
KCNK5	0.340391	1.83303e-15	1.74577e-14	516	486
GAB3	0.340387	1.83469e-15	1.74652e-14	516	516
MAK	0.340262	1.8813e-15	1.78919e-14	516	513
RPS6KA1	0.340244	1.88818e-15	1.79404e-14	516	516
RPF1	0.34004	1.96711e-15	1.86639e-14	516	516
DCN	0.339951	2.00228e-15	1.89885e-14	516	516
AHR	0.339846	2.04481e-15	1.93827e-14	516	516
ECHDC3	0.339751	2.08407e-15	1.97456e-14	516	516
CMYA5	0.339684	2.11217e-15	1.99742e-14	516	516
ROD1	0.339616	2.14139e-15	2.0241e-14	516	516
CD28	0.339462	2.20812e-15	2.08325e-14	516	486
SHMT1	0.339456	2.21098e-15	2.08497e-14	516	516
DES	0.339323	2.27044e-15	2.13902e-14	516	475
C3	0.339236	2.31051e-15	2.17576e-14	516	516
RAB8A	0.339218	2.31896e-15	2.18269e-14	516	516
LAMB4	0.33919	2.33187e-15	2.19382e-14	516	478
TP53I13	0.339101	2.37373e-15	2.2311e-14	516	516
GNL2	0.339063	2.39163e-15	2.24636e-14	516	516
IQCH	0.339062	2.39219e-15	2.24636e-14	516	516
HOXA7	0.338748	2.54675e-15	2.38926e-14	516	386
HORMAD2	0.338563	2.64264e-15	2.4746e-14	516	380
CCDC18	0.338543	2.65347e-15	2.48358e-14	516	516
ACSL5	0.338486	2.68355e-15	2.50823e-14	516	516
C2orf18	0.338483	2.68541e-15	2.5088e-14	516	516
ANXA2P3	0.338445	2.70578e-15	2.52548e-14	516	391
SNX10	0.338437	2.7099e-15	2.52815e-14	516	516
TNFRSF10B	0.33842	2.71909e-15	2.53554e-14	516	516
PABPC4	0.338413	2.72282e-15	2.53784e-14	516	516
CDR2	0.338365	2.74919e-15	2.56004e-14	516	516
SASH3	0.338289	2.79118e-15	2.59674e-14	516	516
SEL1L3	0.338212	2.83395e-15	2.63531e-14	516	516
CALR	0.338154	2.86726e-15	2.66135e-14	516	516
PRKD2	0.338122	2.88543e-15	2.67699e-14	516	516
MATN2	0.338094	2.9018e-15	2.69093e-14	516	516
SLN	0.337892	3.02073e-15	2.79992e-14	516	508
SERINC2	0.337883	3.02573e-15	2.80327e-14	516	516
GZMB	0.337645	3.17263e-15	2.93261e-14	516	471
MAML3	0.337628	3.18357e-15	2.94001e-14	516	516
ITGAV	0.33759	3.20781e-15	2.95837e-14	516	516
HIST1H2BH	0.337589	3.20787e-15	2.95837e-14	516	253
FOLR3	0.337545	3.23618e-15	2.98311e-14	516	362
SNX9	0.337521	3.25187e-15	2.99482e-14	516	516
GAPT	0.337479	3.27873e-15	3.01679e-14	516	513
GCNT1	0.337474	3.28201e-15	3.01843e-14	516	516
LAPTM4A	0.337426	3.3136e-15	3.04609e-14	516	516
GJD3	0.337379	3.34451e-15	3.07169e-14	516	511
ZNF474	0.337345	3.3672e-15	3.0897e-14	516	509
CHRNE	0.337167	3.4885e-15	3.19662e-14	516	516
TAX1BP3	0.337138	3.50831e-15	3.21332e-14	516	516
PODXL	0.337064	3.56022e-15	3.25789e-14	516	516
ZNF468	0.336798	3.7536e-15	3.42859e-14	516	516
SIPA1L2	0.336479	3.99803e-15	3.64854e-14	516	516
C1orf91	0.336465	4.00922e-15	3.65709e-14	516	516
HAMP	0.336425	4.04069e-15	3.68412e-14	516	507
ISL2	0.336299	4.14328e-15	3.77424e-14	516	425
PNRC1	0.336295	4.14655e-15	3.77551e-14	516	516
STT3A	0.33614	4.27561e-15	3.89125e-14	516	516
BNIP2	0.336099	4.31017e-15	3.92093e-14	516	516
COL27A1	0.336069	4.33565e-15	3.94054e-14	516	515
MMP11	0.33606	4.34303e-15	3.94546e-14	516	516
MEIS3P1	0.335923	4.46306e-15	4.05267e-14	516	516
SLC25A45	0.33587	4.50997e-15	4.09342e-14	516	516
GPR174	0.335636	4.72315e-15	4.27917e-14	516	248
GPR139	0.335388	4.95958e-15	4.48933e-14	516	192
PABPC4L	0.335248	5.09794e-15	4.61041e-14	516	516
NFKB2	0.335183	5.16352e-15	4.66552e-14	516	516
CRISPLD1	0.334985	5.36957e-15	4.84298e-14	516	516
RPAP3	0.334969	5.38625e-15	4.85584e-14	516	516
DPPA4	0.334762	5.61031e-15	5.04901e-14	516	356
SHCBP1	0.334762	5.61057e-15	5.04901e-14	516	516
NKX2-5	0.334704	5.67426e-15	5.10404e-14	516	368
ANKRD1	0.334577	5.81741e-15	5.22812e-14	516	424
BTK	0.33426	6.19185e-15	5.55717e-14	516	516
FASLG	0.334041	6.46372e-15	5.796e-14	516	331
SPIB	0.334012	6.49995e-15	5.82588e-14	516	393
CEP55	0.333533	7.13947e-15	6.38199e-14	516	515
DPH3	0.333529	7.14545e-15	6.3845e-14	516	516
CXCL16	0.333511	7.17116e-15	6.40462e-14	516	516
TFRC	0.333479	7.21592e-15	6.44173e-14	516	516
OTOS	0.333459	7.24503e-15	6.46484e-14	516	451
FAM120AOS	0.333331	7.42858e-15	6.62161e-14	516	516
CXCR2	0.333329	7.4306e-15	6.62161e-14	516	516
WDR63	0.333281	7.501e-15	6.68138e-14	516	495
CST6	0.33327	7.51666e-15	6.69236e-14	516	320
CATSPER1	0.333243	7.5568e-15	6.71916e-14	516	397
PSME2	0.333194	7.63048e-15	6.78167e-14	516	516
LOC284276	0.333151	7.69498e-15	6.83598e-14	516	285
MOBKL2A	0.332957	7.99237e-15	7.09389e-14	516	516
ABCC1	0.33286	8.14515e-15	7.22311e-14	516	516
MUL1	0.332803	8.23516e-15	7.29328e-14	516	516
GAP43	0.332795	8.24866e-15	7.30201e-14	516	516
DNAJC22	0.332761	8.30328e-15	7.34713e-14	516	516
FPR3	0.332701	8.40124e-15	7.43052e-14	516	516
TTC7A	0.332667	8.4574e-15	7.4769e-14	516	516
PPIL5	0.332579	8.60351e-15	7.60273e-14	516	516
TMEM50A	0.332503	8.73252e-15	7.70995e-14	516	516
GPR18	0.332392	8.92417e-15	7.86879e-14	516	412
FUCA2	0.332328	9.03525e-15	7.96323e-14	516	516
GAS2L3	0.332145	9.36266e-15	8.24817e-14	516	505
GLB1L	0.331999	9.63381e-15	8.48332e-14	516	516
PAX3	0.331984	9.66136e-15	8.50386e-14	516	213
CFD	0.331977	9.67438e-15	8.50786e-14	516	516
CDC42	0.331943	9.7393e-15	8.56121e-14	516	516
ASCL2	0.331816	9.98336e-15	8.77191e-14	516	515
LTBP1	0.331727	1.01573e-14	8.91691e-14	516	516
LIMS3	0.331679	1.02515e-14	8.99569e-14	516	293
PADI1	0.331676	1.02587e-14	8.99812e-14	516	378
PMFBP1	0.331668	1.02742e-14	9.00771e-14	516	515
GPR1	0.331598	1.04153e-14	9.12746e-14	516	361
FOXL1	0.331521	1.05716e-14	9.25231e-14	516	515
RAB20	0.33151	1.05949e-14	9.26868e-14	516	516
LOC100302650	0.331421	1.07794e-14	9.42603e-14	516	516
HCST	0.331355	1.09183e-14	9.54333e-14	516	516
CRISPLD2	0.331187	1.12801e-14	9.84241e-14	516	516
C13orf26	0.330861	1.2017e-14	1.04763e-13	516	447
BTN2A3	0.330852	1.20393e-14	1.04912e-13	516	516
CCDC103	0.330758	1.226e-14	1.06742e-13	516	516
TFCP2L1	0.33074	1.23028e-14	1.07069e-13	516	516
SCML4	0.330647	1.25255e-14	1.08865e-13	516	485
MOV10	0.330617	1.25991e-14	1.09457e-13	516	516
YY2	0.330586	1.26761e-14	1.10078e-13	516	511
SAMD9	0.330582	1.26849e-14	1.10108e-13	516	516
PELO	0.330544	1.2779e-14	1.10877e-13	516	516
XAF1	0.330531	1.28106e-14	1.11055e-13	516	516
LEF1	0.330393	1.31588e-14	1.13975e-13	516	516
FAM100B	0.330349	1.32708e-14	1.14846e-13	516	516
LY75	0.330343	1.3285e-14	1.1492e-13	516	516
RAB13	0.330256	1.35118e-14	1.16731e-13	516	516
EFNB2	0.330231	1.35777e-14	1.17249e-13	516	516
PRKAA1	0.32999	1.42245e-14	1.22729e-13	516	516
TTC39B	0.329912	1.44393e-14	1.24529e-13	516	514
OAZ1	0.329849	1.46181e-14	1.26017e-13	516	516
LASS2	0.329683	1.50931e-14	1.29778e-13	516	516
PGAM2	0.329627	1.52573e-14	1.31077e-13	516	516
VRK2	0.329514	1.55941e-14	1.33799e-13	516	516
HOXD10	0.329504	1.56246e-14	1.34004e-13	516	322
STAC	0.329316	1.62014e-14	1.38831e-13	516	507
LPAR6	0.329294	1.62688e-14	1.3935e-13	516	516
GIMAP2	0.329106	1.68689e-14	1.44244e-13	516	516
LOXL3	0.328872	1.76485e-14	1.50846e-13	516	516
ERMAP	0.328754	1.80531e-14	1.54173e-13	516	516
C13orf18	0.32868	1.83103e-14	1.5617e-13	516	516
TWIST1	0.328555	1.87566e-14	1.59773e-13	516	516
DOCK11	0.328334	1.95714e-14	1.66221e-13	516	516
SLC20A1	0.328317	1.96331e-14	1.66674e-13	516	516
UNC45A	0.32831	1.96618e-14	1.66847e-13	516	516
GPR172B	0.328151	2.02716e-14	1.71876e-13	516	509
INPP5D	0.32803	2.07459e-14	1.75676e-13	516	516
PMEPA1	0.32802	2.0789e-14	1.75967e-13	516	516
DPP4	0.327966	2.10052e-14	1.77647e-13	516	516
AGTRAP	0.327862	2.14253e-14	1.81123e-13	516	516
TMEM149	0.327824	2.15818e-14	1.82293e-13	516	516
SCIN	0.327697	2.21134e-14	1.86704e-13	516	516
TCTN2	0.327647	2.23283e-14	1.88439e-13	516	516
EPHX3	0.327616	2.24631e-14	1.89497e-13	516	514
BOLA3	0.327571	2.26572e-14	1.90975e-13	516	516
DAB2	0.327294	2.38889e-14	2.01272e-13	516	516
RGS22	0.327275	2.39759e-14	2.01921e-13	516	498
C2orf66	0.327244	2.41206e-14	2.03054e-13	516	486
LYST	0.327155	2.45338e-14	2.06446e-13	516	516
C5orf15	0.32704	2.50802e-14	2.10867e-13	516	516
IFNGR1	0.327023	2.51606e-14	2.11454e-13	516	516
LILRB1	0.327014	2.52021e-14	2.11715e-13	516	516
SLC9A1	0.326988	2.53306e-14	2.12705e-13	516	516
DNTTIP2	0.326926	2.56297e-14	2.15127e-13	516	516
AFP	0.326921	2.5658e-14	2.15274e-13	516	216
FLJ35776	0.326786	2.63288e-14	2.2081e-13	516	516
STRA6	0.326781	2.63532e-14	2.20923e-13	516	514
RTCD1	0.326658	2.6976e-14	2.25955e-13	516	516
MAP3K14	0.326584	2.73634e-14	2.29009e-13	516	516
RARS	0.32645	2.80694e-14	2.34526e-13	516	516
IL18R1	0.326437	2.81412e-14	2.35029e-13	516	514
CASS4	0.326347	2.86281e-14	2.38996e-13	516	516
CSF3R	0.326019	3.04719e-14	2.54283e-13	516	516
PSORS1C1	0.325649	3.26997e-14	2.72533e-13	516	487
FKBP10	0.325616	3.29015e-14	2.74102e-13	516	516
ACOT12	0.325608	3.29536e-14	2.74422e-13	516	259
GMPPA	0.325467	3.38458e-14	2.81502e-13	516	516
ACPL2	0.32536	3.45424e-14	2.87177e-13	516	516
LAMC2	0.325336	3.46997e-14	2.88365e-13	516	508
SLC35D2	0.325302	3.49269e-14	2.90133e-13	516	516
DMBX1	0.32516	3.58792e-14	2.97798e-13	516	237
BAK1	0.325145	3.59847e-14	2.9855e-13	516	516
HOXA10	0.325087	3.63806e-14	3.01585e-13	516	422
SLC39A7	0.32496	3.72728e-14	3.08726e-13	516	516
GGN	0.324953	3.73165e-14	3.08945e-13	516	516
SNAP23	0.324951	3.73299e-14	3.08945e-13	516	516
MYO1E	0.324945	3.73788e-14	3.09222e-13	516	516
CANT1	0.324915	3.75891e-14	3.10834e-13	516	516
ZAP70	0.324833	3.81811e-14	3.1521e-13	516	513
CD52	0.324795	3.84523e-14	3.17058e-13	516	515
TMEM140	0.324776	3.8592e-14	3.18079e-13	516	516
P2RY2	0.324737	3.8878e-14	3.20174e-13	516	493
CENPL	0.324674	3.93444e-14	3.23882e-13	516	516
CCDC123	0.324521	4.0507e-14	3.33043e-13	516	516
HOXC4	0.324502	4.06503e-14	3.34084e-13	516	513
IRX5	0.32447	4.08971e-14	3.35838e-13	516	476
NCF4	0.32434	4.19186e-14	3.43664e-13	516	516
COLEC11	0.324273	4.24512e-14	3.47605e-13	516	514
LPHN2	0.324164	4.33326e-14	3.54678e-13	516	516
GATA3	0.324078	4.40484e-14	3.6039e-13	516	489
BANK1	0.323884	4.5694e-14	3.73245e-13	516	510
NLRC4	0.323869	4.5822e-14	3.74138e-13	516	516
CPA6	0.323824	4.62085e-14	3.77141e-13	516	344
ZBTB7B	0.323677	4.75099e-14	3.87133e-13	516	516
MX1	0.323513	4.90101e-14	3.98873e-13	516	516
DENND1C	0.323442	4.96712e-14	4.04089e-13	516	516
FAM119B	0.323293	5.10792e-14	4.15207e-13	516	516
MXRA8	0.323221	5.1783e-14	4.20588e-13	516	516
RNPEP	0.323166	5.2319e-14	4.2477e-13	516	516
AKR1B10	0.323076	5.32162e-14	4.31879e-13	516	331
JDP2	0.322929	5.47152e-14	4.43366e-13	516	516
CLP1	0.322928	5.47199e-14	4.43366e-13	516	516
TMEM114	0.322917	5.48331e-14	4.44104e-13	516	210
WAS	0.322822	5.58275e-14	4.51975e-13	516	516
MGC12982	0.322817	5.58733e-14	4.52164e-13	516	516
STAT6	0.322625	5.79353e-14	4.68474e-13	516	516
MPZL3	0.322615	5.80429e-14	4.69155e-13	516	445
SKAP1	0.322572	5.8511e-14	4.72748e-13	516	435
ITGA4	0.322411	6.03114e-14	4.86669e-13	516	516
ARF4	0.322358	6.09093e-14	4.91138e-13	516	516
FYB	0.322353	6.09756e-14	4.91475e-13	516	516
RBM46	0.322341	6.11091e-14	4.92354e-13	516	413
EPS8L1	0.322108	6.38432e-14	5.13763e-13	516	515
LGALS9	0.32209	6.4057e-14	5.15278e-13	516	516
PRAM1	0.322087	6.40948e-14	5.15376e-13	516	516
ARL11	0.322007	6.50678e-14	5.22781e-13	516	516
CROT	0.321967	6.55492e-14	5.26438e-13	516	516
KPNA2	0.321947	6.57985e-14	5.28229e-13	516	516
LRRC36	0.321856	6.6932e-14	5.36471e-13	516	512
HELB	0.321787	6.78072e-14	5.43269e-13	516	513
TMED2	0.321615	7.00278e-14	5.6039e-13	516	516
TNFRSF4	0.321538	7.10414e-14	5.68274e-13	516	515
TULP1	0.321527	7.11866e-14	5.69209e-13	516	227
PIK3R6	0.321389	7.30516e-14	5.83657e-13	516	516
PI15	0.321374	7.32641e-14	5.84951e-13	516	515
FBLN1	0.321373	7.32717e-14	5.84951e-13	516	516
TMEM127	0.321364	7.34018e-14	5.85756e-13	516	516
ELF1	0.321309	7.41573e-14	5.91315e-13	516	516
C6orf15	0.321284	7.45061e-14	5.93625e-13	516	137
GPR109B	0.321098	7.714e-14	6.13637e-13	516	352
AQP5	0.321059	7.77011e-14	6.17856e-13	516	434
PCOTH	0.320984	7.88114e-14	6.26189e-13	516	513
WWTR1	0.320871	8.0484e-14	6.38973e-13	516	516
RAG1	0.320857	8.07026e-14	6.40203e-13	516	515
ZNF683	0.320792	8.16915e-14	6.47535e-13	516	431
MOCOS	0.320785	8.17983e-14	6.48127e-13	516	501
EPS8	0.320635	8.41097e-14	6.65653e-13	516	516
GPRIN3	0.320541	8.56107e-14	6.77266e-13	516	516
MSMP	0.320534	8.57101e-14	6.77785e-13	516	516
CHEK2	0.320488	8.64593e-14	6.8344e-13	516	516
MAP7D3	0.320369	8.84031e-14	6.98255e-13	516	516
ZNF321	0.320347	8.87665e-14	7.0085e-13	516	516
STK3	0.320291	8.96855e-14	7.07829e-13	516	516
PITX1	0.320231	9.07026e-14	7.15574e-13	516	478
HEG1	0.320134	9.23503e-14	7.28002e-13	516	516
LILRB4	0.320118	9.26357e-14	7.29965e-13	516	516
HSPA1A	0.320105	9.28542e-14	7.314e-13	516	516
CRIP1	0.320083	9.32387e-14	7.34141e-13	516	516
IL32	0.320057	9.3693e-14	7.37429e-13	516	516
ADCK4	0.319883	9.67802e-14	7.60833e-13	516	516
MRPS15	0.319733	9.95105e-14	7.80464e-13	516	516
SLC2A4RG	0.319632	1.01403e-13	7.94379e-13	516	516
SLC3A2	0.319565	1.02682e-13	8.04082e-13	516	516
H2AFJ	0.319504	1.03836e-13	8.12485e-13	516	516
PTBP1	0.319365	1.06566e-13	8.32552e-13	516	516
SEC61G	0.319288	1.08089e-13	8.44123e-13	516	516
CTSD	0.319273	1.08403e-13	8.46242e-13	516	516
EFNB1	0.319257	1.08727e-13	8.48445e-13	516	516
HOXC13	0.319233	1.09204e-13	8.51833e-13	516	141
HOXD13	0.318977	1.14516e-13	8.92575e-13	516	232
TRIM6	0.318873	1.16761e-13	9.09719e-13	516	516
ARL13B	0.318766	1.19086e-13	9.27478e-13	516	516
TMEM64	0.318742	1.19636e-13	9.31398e-13	516	516
IGFBP6	0.318679	1.21026e-13	9.41858e-13	516	516
TBC1D19	0.318536	1.24277e-13	9.66031e-13	516	516
CTAGE9	0.318421	1.2695e-13	9.85668e-13	516	499
NCKAP1L	0.318407	1.27281e-13	9.87853e-13	516	516
WDR78	0.31837	1.28159e-13	9.94283e-13	516	516
DDIT3	0.318322	1.29305e-13	1.00279e-12	516	516
AQP3	0.318101	1.34691e-13	1.04375e-12	516	516
GANAB	0.317982	1.37696e-13	1.06663e-12	516	516
YKT6	0.317883	1.40236e-13	1.08546e-12	516	516
FAM129B	0.317752	1.4367e-13	1.11119e-12	516	516
GALNS	0.317696	1.45168e-13	1.12234e-12	516	516
COL6A1	0.317641	1.46658e-13	1.13256e-12	516	516
EREG	0.317634	1.46851e-13	1.13361e-12	516	394
C6orf141	0.317581	1.48297e-13	1.14389e-12	516	477
LPP	0.317553	1.49051e-13	1.14926e-12	516	516
RELT	0.317401	1.53301e-13	1.18158e-12	516	516
UAP1	0.317308	1.55946e-13	1.20151e-12	516	516
DNAJC25	0.317144	1.60717e-13	1.23732e-12	516	516
PHEX	0.316752	1.72756e-13	1.32848e-12	516	507
FKBP9L	0.31654	1.79622e-13	1.38074e-12	516	516
C20orf141	0.316509	1.80661e-13	1.3882e-12	516	74
DUSP10	0.316432	1.83225e-13	1.40683e-12	516	516
POLD4	0.316343	1.86259e-13	1.42903e-12	516	516
SIPA1L1	0.316224	1.9037e-13	1.46001e-12	516	516
IRAK4	0.316181	1.91885e-13	1.47051e-12	516	516
HOXC8	0.316154	1.9283e-13	1.47719e-12	516	228
SNAI2	0.316085	1.95282e-13	1.49483e-12	516	516
EXT2	0.31602	1.97645e-13	1.51234e-12	516	516
TACSTD2	0.315941	2.00531e-13	1.53384e-12	516	486
MAP4K1	0.315838	2.04359e-13	1.56193e-12	516	516
RPA3	0.315782	2.06459e-13	1.57618e-12	516	516
LYSMD3	0.315748	2.07743e-13	1.58538e-12	516	516
TMEM39A	0.315706	2.09348e-13	1.59642e-12	516	516
CRYZ	0.315477	2.18304e-13	1.66156e-12	516	516
FPGT	0.315408	2.21081e-13	1.68206e-12	516	516
FAM19A3	0.315224	2.28679e-13	1.73789e-12	516	486
TBC1D8	0.315205	2.29473e-13	1.74327e-12	516	516
GCET2	0.315193	2.29989e-13	1.74653e-12	516	481
CLEC18C	0.31515	2.31792e-13	1.75889e-12	516	508
MMP7	0.315019	2.37393e-13	1.79867e-12	516	425
RBMS2	0.314942	2.40765e-13	1.82353e-12	516	516
IGFL3	0.314859	2.44468e-13	1.85088e-12	516	208
CD226	0.314847	2.44999e-13	1.8535e-12	516	515
CEACAM1	0.314502	2.60912e-13	1.96944e-12	516	512
FCAR	0.314471	2.62409e-13	1.98e-12	516	475
SURF4	0.314404	2.65643e-13	2.00314e-12	516	516
CKM	0.314403	2.65676e-13	2.00314e-12	516	442
SEC14L1	0.314322	2.69626e-13	2.02988e-12	516	516
BRCA1	0.314283	2.71533e-13	2.0427e-12	516	516
OBFC2A	0.314265	2.72443e-13	2.04878e-12	516	516
GINS4	0.314217	2.74814e-13	2.06583e-12	516	516
IL31RA	0.31401	2.85397e-13	2.14298e-12	516	212
BDKRB1	0.313968	2.87599e-13	2.15791e-12	516	395
TNFSF8	0.313962	2.87898e-13	2.15934e-12	516	513
GPN1	0.313891	2.91654e-13	2.18588e-12	516	516
LOC100270710	0.313879	2.92313e-13	2.19001e-12	516	516
AMIGO2	0.313771	2.98115e-13	2.23264e-12	516	516
ACVR1	0.313754	2.99009e-13	2.2385e-12	516	516
RINL	0.313643	3.05129e-13	2.28176e-12	516	516
E2F7	0.31359	3.08085e-13	2.30301e-12	516	515
DIAPH1	0.313495	3.13446e-13	2.34135e-12	516	516
C20orf195	0.313481	3.1426e-13	2.34656e-12	516	404
ALPK2	0.313477	3.14452e-13	2.34711e-12	516	489
ALDH1A3	0.313341	3.22346e-13	2.40455e-12	516	503
IKZF1	0.313254	3.27463e-13	2.44151e-12	516	516
ARHGAP27	0.313157	3.33268e-13	2.48202e-12	516	516
LMAN1	0.313053	3.39639e-13	2.52666e-12	516	516
A2LD1	0.31299	3.4351e-13	2.55451e-12	516	516
KCNE1	0.312793	3.56048e-13	2.64677e-12	516	496
APOLD1	0.312688	3.62876e-13	2.69354e-12	516	516
COL8A2	0.312664	3.64463e-13	2.70432e-12	516	516
PRR16	0.312578	3.7017e-13	2.74261e-12	516	516
NEDD1	0.312468	3.77623e-13	2.79372e-12	516	516
BZW1	0.312336	3.86789e-13	2.86047e-12	516	516
ULBP2	0.312215	3.95337e-13	2.92046e-12	516	515
C9orf89	0.312063	4.06363e-13	2.99861e-12	516	516
PLVAP	0.31198	4.12481e-13	3.04152e-12	516	516
TMEM2	0.311754	4.29699e-13	3.16267e-12	516	516
EGFLAM	0.311711	4.32987e-13	3.18571e-12	516	516
F13A1	0.311635	4.38993e-13	3.22871e-12	516	516
TANC1	0.311598	4.41924e-13	3.24908e-12	516	516
C19orf55	0.311461	4.52995e-13	3.32926e-12	516	516
VSIG4	0.311372	4.60321e-13	3.38062e-12	516	516
ANGPTL4	0.311347	4.62385e-13	3.39454e-12	516	516
IFRD1	0.311323	4.64459e-13	3.40852e-12	516	516
FNDC1	0.311254	4.70272e-13	3.44992e-12	516	504
SLC4A2	0.311242	4.7129e-13	3.45613e-12	516	516
PHC2	0.311237	4.71671e-13	3.45766e-12	516	516
FAM3D	0.31115	4.79137e-13	3.50727e-12	516	335
SIGLECP3	0.311079	4.85295e-13	3.54717e-12	516	423
LY9	0.311006	4.91698e-13	3.59006e-12	516	412
HOXA2	0.310942	4.97434e-13	3.63062e-12	516	226
PLCG2	0.3109	5.01233e-13	3.65701e-12	516	516
TAPBP	0.310781	5.12085e-13	3.73077e-12	516	516
FRZB	0.310644	5.24789e-13	3.81917e-12	516	516
BIN3	0.31063	5.26117e-13	3.82745e-12	516	516
SLC47A1	0.310537	5.35037e-13	3.88953e-12	516	516
TRAPPC2P1	0.310506	5.37957e-13	3.90792e-12	516	516
NR1I2	0.310429	5.45479e-13	3.95541e-12	516	487
ITGB4	0.310413	5.47042e-13	3.96531e-12	516	516
C7	0.310356	5.52662e-13	4.00461e-12	516	516
FAM70A	0.310322	5.56055e-13	4.02484e-12	516	516
TGM5	0.310277	5.60572e-13	4.05461e-12	516	464
MICA	0.310258	5.62478e-13	4.06693e-12	516	516
MYO9B	0.310096	5.79154e-13	4.18449e-12	516	516
LILRA2	0.31009	5.79727e-13	4.18713e-12	516	516
POFUT1	0.30997	5.92347e-13	4.27213e-12	516	516
C20orf134	0.309912	5.9854e-13	4.31524e-12	516	511
PTPLAD2	0.30982	6.08443e-13	4.38507e-12	516	516
CCL22	0.309784	6.1248e-13	4.411e-12	516	510
PLOD2	0.309639	6.28528e-13	4.52495e-12	516	516
HOXC11	0.309617	6.3104e-13	4.54141e-12	516	119
RNFT1	0.30961	6.3178e-13	4.5451e-12	516	516
CD6	0.309599	6.33044e-13	4.55256e-12	516	514
GJA4	0.309508	6.43453e-13	4.62246e-12	516	516
CDA	0.309449	6.50253e-13	4.66797e-12	516	516
SPRED3	0.309445	6.50753e-13	4.66922e-12	516	499
PER1	0.309444	6.50892e-13	4.66922e-12	516	516
CA9	0.309269	6.71591e-13	4.81426e-12	516	510
MYL4	0.309241	6.74921e-13	4.83469e-12	516	362
H6PD	0.309157	6.85157e-13	4.90451e-12	516	516
CCDC140	0.309145	6.86706e-13	4.91385e-12	516	65
B4GALT4	0.309121	6.89635e-13	4.93305e-12	516	516
SRF	0.309074	6.95433e-13	4.97276e-12	516	516
ANGPTL6	0.308957	7.10178e-13	5.07277e-12	516	516
PTPN18	0.308847	7.24181e-13	5.17096e-12	516	516
SPAG17	0.308831	7.26271e-13	5.18036e-12	516	400
METRNL	0.308808	7.29275e-13	5.19994e-12	516	516
EMR3	0.308671	7.47376e-13	5.32145e-12	516	276
SLC25A30	0.308597	7.57317e-13	5.39031e-12	516	516
UGCG	0.308572	7.60611e-13	5.41184e-12	516	516
NAALADL1	0.308517	7.68169e-13	5.46175e-12	516	516
PNO1	0.308436	7.794e-13	5.53768e-12	516	516
SEC14L2	0.3084	7.84353e-13	5.56893e-12	516	516
MAGOH	0.308378	7.87386e-13	5.58849e-12	516	516
FAM183A	0.308339	7.92895e-13	5.6256e-12	516	262
GPR109A	0.308267	8.03134e-13	5.69624e-12	516	445
IRF2	0.30816	8.18633e-13	5.80411e-12	516	516
LOC100129034	0.308115	8.25185e-13	5.84851e-12	516	516
PAM	0.3081	8.27361e-13	5.86186e-12	516	516
POM121L8P	0.307994	8.43146e-13	5.96738e-12	516	456
TPD52L2	0.307829	8.68256e-13	6.13429e-12	516	516
HERC5	0.307662	8.94457e-13	6.31274e-12	516	516
A4GALT	0.307648	8.96746e-13	6.32667e-12	516	516
C14orf106	0.307567	9.0968e-13	6.41567e-12	516	516
LOC400804	0.307491	9.22122e-13	6.50114e-12	516	376
RFC2	0.307474	9.24855e-13	6.51482e-12	516	516
BHLHE40	0.307438	9.3079e-13	6.55075e-12	516	516
DPAGT1	0.307427	9.32679e-13	6.56175e-12	516	516
MYO1B	0.307165	9.77015e-13	6.86405e-12	516	516
HK2	0.307157	9.78373e-13	6.87119e-12	516	516
TTC39A	0.307125	9.8408e-13	6.90885e-12	516	514
ICMT	0.307103	9.87947e-13	6.93358e-12	516	516
CD14	0.307064	9.94695e-13	6.9785e-12	516	516
PCDH18	0.307037	9.99564e-13	7.01021e-12	516	516
DOCK2	0.307028	1.00104e-12	7.01814e-12	516	516
GAPDH	0.30694	1.01678e-12	7.12601e-12	516	516
IFI6	0.306925	1.01951e-12	7.14263e-12	516	516
DERL3	0.306873	1.02903e-12	7.20176e-12	516	516
CITED2	0.306731	1.05528e-12	7.37521e-12	516	516
PEX13	0.306709	1.05942e-12	7.40159e-12	516	516
SLC29A1	0.306604	1.07925e-12	7.53748e-12	516	516
WDR41	0.306523	1.09478e-12	7.63796e-12	516	516
HIST1H2BK	0.306512	1.09703e-12	7.651e-12	516	516
MAGT1	0.306471	1.10498e-12	7.70381e-12	516	516
KIAA0495	0.306173	1.16474e-12	8.11201e-12	516	516
FAM92B	0.306133	1.17304e-12	8.16699e-12	516	200
OAS1	0.305919	1.21824e-12	8.46698e-12	516	516
CKLF	0.305912	1.21971e-12	8.47427e-12	516	516
ADORA3	0.305876	1.22739e-12	8.52469e-12	516	516
DEPDC1	0.305869	1.22895e-12	8.53254e-12	516	515
IQUB	0.305801	1.2439e-12	8.63039e-12	516	516
TMEM60	0.30577	1.25058e-12	8.67373e-12	516	516
CRTAM	0.305755	1.25409e-12	8.69211e-12	516	472
TOM1L1	0.305617	1.28503e-12	8.89729e-12	516	515
MTFR1	0.305499	1.31186e-12	9.07997e-12	516	516
AEN	0.305324	1.35293e-12	9.34491e-12	516	516
PBX3	0.305254	1.36991e-12	9.4557e-12	516	516
STBD1	0.305072	1.41439e-12	9.74929e-12	516	516
CKAP4	0.305069	1.41529e-12	9.75218e-12	516	516
CTLA4	0.305036	1.42353e-12	9.80558e-12	516	494
TMEM87B	0.304983	1.43689e-12	9.89082e-12	516	516
LRGUK	0.304882	1.46267e-12	1.00613e-11	516	504
CLEC18A	0.304762	1.49363e-12	1.02708e-11	516	516
HCK	0.304735	1.50091e-12	1.03173e-11	516	516
HOTAIR	0.304713	1.50674e-12	1.03503e-11	516	131
C9orf64	0.304492	1.56625e-12	1.07408e-11	516	516
TMEM67	0.304486	1.56798e-12	1.0749e-11	516	516
VGLL2	0.304423	1.5853e-12	1.0864e-11	516	263
IMPA2	0.304395	1.59338e-12	1.09156e-11	516	516
LHFP	0.304259	1.63162e-12	1.117e-11	516	516
RIT1	0.30423	1.64012e-12	1.12243e-11	516	516
MMP3	0.304226	1.64124e-12	1.12282e-11	516	314
FOXD2	0.304191	1.65136e-12	1.12936e-11	516	516
IL22RA1	0.304188	1.6522e-12	1.12948e-11	516	415
IGJ	0.304186	1.65267e-12	1.12948e-11	516	496
TGM2	0.304164	1.65929e-12	1.13324e-11	516	516
PTTG1	0.304106	1.67599e-12	1.14426e-11	516	516
RHOD	0.304	1.70757e-12	1.16541e-11	516	511
CLDN7	0.303944	1.72457e-12	1.17622e-11	516	512
MRGPRF	0.303908	1.73539e-12	1.1828e-11	516	516
DEF6	0.303883	1.74294e-12	1.18714e-11	516	516
NOP10	0.303667	1.81031e-12	1.23052e-11	516	516
DNALI1	0.30366	1.81252e-12	1.2316e-11	516	516
TMEM176B	0.303649	1.81584e-12	1.23345e-11	516	516
VNN3	0.303588	1.83534e-12	1.24585e-11	516	308
SERPINF2	0.303518	1.85797e-12	1.26036e-11	516	516
HOXC5	0.303508	1.86112e-12	1.26207e-11	516	297
NUP37	0.303157	1.97898e-12	1.33791e-11	516	516
RARRES2	0.303084	2.00445e-12	1.35287e-11	516	516
DUSP4	0.302988	2.0384e-12	1.37532e-11	516	516
SIPA1L3	0.302852	2.0873e-12	1.40737e-11	516	516
SAMD3	0.302796	2.10798e-12	1.42083e-11	516	481
FOXC1	0.302742	2.12789e-12	1.43329e-11	516	516
LAT2	0.302697	2.14476e-12	1.44369e-11	516	516
GMPPB	0.302539	2.20445e-12	1.48287e-11	516	516
CYFIP1	0.302421	2.25051e-12	1.51234e-11	516	516
MBNL1	0.302382	2.26586e-12	1.52215e-11	516	516
CCDC8	0.302348	2.2793e-12	1.53066e-11	516	516
SPATA1	0.302344	2.28083e-12	1.53118e-11	516	415
CD72	0.302323	2.289e-12	1.53614e-11	516	516
C2orf39	0.302283	2.305e-12	1.54636e-11	516	453
CD19	0.302268	2.31119e-12	1.55e-11	516	446
GBE1	0.302246	2.32017e-12	1.5555e-11	516	516
EML4	0.302009	2.4177e-12	1.61873e-11	516	516
C21orf62	0.30197	2.43422e-12	1.62925e-11	516	516
NIP7	0.301899	2.46436e-12	1.64832e-11	516	516
MYO5B	0.301782	2.51527e-12	1.68181e-11	516	516
SIK1	0.301739	2.53398e-12	1.6932e-11	516	516
ERRFI1	0.301714	2.54522e-12	1.70014e-11	516	516
ADAMDEC1	0.30161	2.59122e-12	1.72972e-11	516	393
COPZ2	0.301555	2.61616e-12	1.74579e-11	516	516
CD55	0.301442	2.66806e-12	1.77983e-11	516	516
SLC35D1	0.301409	2.68342e-12	1.78948e-11	516	516
LILRB2	0.301379	2.69729e-12	1.79694e-11	516	516
IL10	0.301336	2.71761e-12	1.80988e-11	516	505
FZD1	0.301281	2.74364e-12	1.82661e-11	516	516
PRKACA	0.301231	2.7675e-12	1.84188e-11	516	516
DUSP14	0.301207	2.77905e-12	1.84895e-11	516	516
LGI2	0.301126	2.81835e-12	1.87448e-11	516	516
SLC22A18	0.300868	2.94764e-12	1.95788e-11	516	516
EMB	0.300824	2.96985e-12	1.97198e-11	516	516
CSNK1G2	0.300814	2.97504e-12	1.97477e-11	516	516
C4A	0.300677	3.04632e-12	2.01875e-11	516	516
PTHLH	0.300604	3.08508e-12	2.04107e-11	516	516
TNFRSF9	0.300535	3.12251e-12	2.06448e-11	516	363
TMEM185B	0.300508	3.13694e-12	2.07333e-11	516	516
IL13RA2	0.300438	3.1751e-12	2.09648e-11	516	503
TSPAN2	0.300348	3.22519e-12	2.1285e-11	516	515
MGAT2	0.30032	3.24042e-12	2.13751e-11	516	516
ECM1	0.300243	3.28426e-12	2.165e-11	516	516
[truncated: 18,087 more rows]

## Sheet: Table 5
TCGA-CIBERSORT Result
Input Sample	B cells naive	B cells memory	Plasma cells	T cells CD8	T cells CD4 naive	T cells CD4 memory resting	T cells CD4 memory activated	T cells follicular helper	T cells regulatory (Tregs)	T cells gamma delta	NK cells resting	NK cells activated	Monocytes	Macrophages M0	Macrophages M1	Macrophages M2	Dendritic cells resting	Dendritic cells activated	Mast cells resting	Mast cells activated	Eosinophils	Neutrophils	P-value	Pearson Correlation	RMSE
TCGA-CS-4938	0.00164121	0.00181106	0	0	0	0.103678	0	0	0	0	0	0.0434713	0.381757	0	0.00195174	0.338779	0	0	0	0.118174	0.00873654	0	0.13	0.098371	1.07395
TCGA-CS-4941	0.0596622	0	0	0.0153631	0	0.163094	0	0	0.00461447	0	0	0.0599357	0.177643	0	0.0855124	0.25445	0	0	0.178633	0	0	0.00109154	0.13	0.105608	1.03706
TCGA-CS-4942	0.0282963	0	0	0	0	0.0587098	0	0	0	0	0	0.0112021	0.478045	0	0.00856401	0.304608	0	0.00513611	0.0942837	0	0.0111313	0	0.03	0.230483	1.01528
TCGA-CS-4943	0	0	0.00250488	0	0	0.116108	0	0	0	0	0	0.0514421	0.375697	0	0.021447	0.323342	0	0	0	0.0989265	0.0105325	0	0.12	0.11382	1.0621
TCGA-CS-4944	0.00183127	0.00254355	0.001	0.0396667	0	0.11679	0	0.00469967	0	0	0.0011141	0.0157054	0.166927	0	0	0.504699	0	0	0.132072	0	0.0100211	0.00295999	0.14	0.0934692	1.06243
TCGA-CS-5393	0	0	0.0003	0	0	0.0904401	0	0	0.00667051	0	0.0099553	0.0210588	0.266147	0	0	0.28217	0	0	0.262196	0	0.0223983	0.0386691	0.07	0.135761	1.04268
TCGA-CS-5394	0.0396152	0	0	0.0278425	0	0.0782284	0.0282871	0	0	0	0.0763612	0	0.0270497	0.0651389	0.054682	0.285047	0	0	0.311743	0	0	0.00600494	0.97	-0.0411	1.10483
TCGA-CS-5395	0.0347323	0	0	0	0	0.0630481	0	0	0	0.0003	0	0.0167333	0.503305	0	0	0.294451	0	0.00220477	0.0553301	0	0.0298996	0	0.43	0.0302086	1.11812
TCGA-CS-5396	0	0.0001	0	0	0.0634535	0.132852	0	0	0	0	0.0513278	0	0.00875198	0	0.00617676	0.542193	0	0	0.173159	0	0.00326539	0.0187632	0.56	0.0139419	1.09414
TCGA-CS-5397	0	0	0.0049638	0.0405128	0	0.153505	0	0.00134078	0	0	0	0.0657097	0.255881	0	0.0156925	0.369875	0.00150575	0.00212127	0.0753994	0	0.00468626	0.00880593	0.3	0.0497598	1.07268
TCGA-CS-6186	0.0114623	0	0	0	0	0.183052	0	0.0003	0	0	0.0366384	0.0350801	0.165431	0	0.0621268	0.398825	0	0	0.0828555	0	0.0212537	0.00297285	0.43	0.0319328	1.07408
TCGA-CS-6188	0	0.00706616	0	0	0	0.115174	0	0.0045539	0.00370731	0	0.00811801	0.0203859	0.00759788	0.362555	0.0124003	0.406467	0	0	0.038205	0	0	0.0137695	0.07	0.145822	1.07627
TCGA-CS-6290	0.00187858	0.00593547	0	0	0	0.0783867	0	0	0.0111819	0	0.0290863	0.00673365	0.400067	0	0.0129734	0.315132	0	0	0.131586	0	0.0070393	0	0.04	0.219272	1.01029
TCGA-CS-6666	0.00306566	0	0	0	0	0.158496	0.00886681	0	0.0003	0	0.105643	0	0.115331	0.174524	0.00557532	0.401431	0	0	0.00770209	0	0	0.0190237	0.14	0.0929712	1.06824
TCGA-CS-6667	0.0297966	0	0	0	0.0116426	0.116837	0	0	0	0	0.0878186	0	0.29931	0	0.0328567	0.328782	0	0	0.0430071	0	0	0.049949	0.21	0.0714192	1.06815
TCGA-CS-6668	0	0.0105634	0	0.0269308	0	0	0	0.0516828	0	0	0	0.0415779	0	0.181803	0.0488369	0.561894	0.0100651	0	0.0666458	0	0	0	0.94	-0.0288	1.14972
TCGA-CS-6669	0.093833	0	0	0.02739	0	0.0611723	0	0	0	0	0	0.0185858	0.481188	0	0	0.18864	0	0	0.0613316	0	0.0678602	0	0.94	-0.0317	1.12884
TCGA-CS-6670	0	0	0	0.00629358	0	0.0208246	0	0.0760679	0	0	0	0.0444094	0.422514	0	0.00462293	0.0996425	0	0.00532383	0	0.252929	0.0673717	0	0.23	0.06686	1.09998
TCGA-DB-5270	0.014225	0	0	0.0275466	0	0.0522595	0	0.0291483	0	0.0009	0	0.0525413	0.395697	0	0.0392055	0.22485	0	0	0	0.104706	0.0589301	0	0.15	0.0921274	1.06745
TCGA-DB-5273	0.0176384	0	0	0	0	0.105675	0	0	0	0	0	0.0230865	0.445088	0	0.0224978	0.370547	0	0	0.0154679	0	0	0	0.04	0.182043	1.04085
TCGA-DB-5274	0.00124531	0.0116946	0	0.0332269	0	0.026126	0	0.0615687	0	0.0062085	0	0.0724222	0.178401	0.0323896	0.018445	0.445025	0.00153293	0	0	0.0973906	0.0088347	0.00548939	0.03	0.256818	0.990639
TCGA-DB-5275	0	0.0008	0.00160134	0.00587945	0	0.102227	0	0.0435974	0	0	0	0.0550023	0.31242	0	0.0450282	0.126426	0	0	0	0.26945	0.00749649	0.0300631	0.13	0.105822	1.07336
TCGA-DB-5277	0	0	0	0.0232959	0.00348363	0.0664737	0	0.0328413	0	0	0	0.0872781	0.0846486	0	0.0175047	0.52001	0.0009	0	0.143345	0	0.0201963	0	0.25	0.0590824	1.07614
TCGA-DB-5278	0	0.0106379	0	0.00375797	0	0.271526	0	0	0	0	0.0465797	0.0166179	0.138272	0	0.0259252	0.353552	0	0	0.102167	0	0.0274586	0.00350501	0.29	0.0528621	1.05974
TCGA-DB-5279	0.0133598	0	0	0.0899467	0	0.0412023	0	0.0170529	0	0	0.010731	0.0190337	0.325886	0	0.0157069	0.0815905	0	0	0	0.217627	0	0.167864	0.21	0.0695227	1.1007
TCGA-DB-5280	0	0.0306198	0.0004	0.00511686	0.0006	0.0646739	0	0	0	0	0.036823	0	0.411602	0	0.0391887	0.346644	0	0	0.0625404	0	0	0.00175519	0.09	0.12348	1.05988
TCGA-DB-5281	0	0.00198163	0.00118831	0.0679211	0	0.304629	0	0.025635	0.00897655	0	0	0.066086	0.191743	0.026899	0.048393	0.0479517	0.00841455	0	0.140397	0	0	0.0597846	0.35	0.0400529	1.07249
TCGA-DB-A4X9	0	0.00940181	0.0007	0	0	0.29275	0	0	0.0498441	0	0.187744	0	0.22623	0.0026382	0.00161137	0.123059	0	0	0.10444	0	0.00156885	0	0.21	0.0737776	1.06226
TCGA-DB-A4XA	0	0.00656955	0.0025428	0.0488785	0	0.115657	0	0	0	0	0.00159554	0.0380158	0.0742815	0	0.0773835	0.478126	0.0171398	0	0.13981	0	0	0	0.13	0.107232	1.04972
TCGA-DB-A4XB	0.0149324	0.00986146	0.00530925	0.0241425	0	0.0446343	0	0.0440171	0	0.00742651	0	0.0346766	0.401993	0	0.026021	0.167207	0	0	0	0.1726	0.0471785	0	0.24	0.0631109	1.08274
TCGA-DB-A4XC	0	0.0062701	0	0	0.0146149	0.0995733	0.00538335	0	0.00160881	0	0	0	0.228649	0	0.00590716	0.483048	0	0	0.125751	0	0.00112045	0.0280743	0.13	0.104479	1.06422
TCGA-DB-A4XD	0.00765207	0	0	0.0350018	0	0.0506329	0	0	0.0001	0	0	0	0.0884734	0	0.0616147	0.427224	0	0	0.310955	0	0	0.0183948	0.32	0.0435216	1.08879
TCGA-DB-A4XE	0	0.00606216	0	0	0.0202295	0.0597077	0	0	0.0101031	0	0.0426406	0.0200715	0.544156	0.0341544	0	0.0919811	0	0	0.164882	0	0.00601135	0	0.26	0.0567076	1.09745
TCGA-DB-A4XF	0	0.00226114	0	0.00496016	0.0167019	0.0510856	0	0.00809748	0	0	0	0.0333082	0.0762093	0	0.0176893	0.536766	0.0006	0	0.251848	0	0.0005	0	0.29	0.054114	1.08854
TCGA-DB-A4XG	0	0.00382937	0	0	0.156402	0.112264	0	0.098107	0	0	0	0.140891	0.194924	0	0.0002	0.237859	0	0	0.0394441	0	0.0160575	0	0.58	0.0125915	1.09033
TCGA-DB-A4XH	0	0.0510995	0	0	0	0.0751516	0	0.0101498	0	0	0.0002	0.0326152	0.180814	0	0.0590156	0.286787	0	0	0	0.171133	0.133069	0	0.62	0.0064831	1.09553
TCGA-DB-A64L	0.077663	0	0	0.0629927	0	0.0638374	0	0.0156706	0	0	0.0120463	0.060198	0.219488	0.0220452	0.0210536	0.181007	0	0	0	0.107944	0	0.156054	0.09	0.123569	1.05041
TCGA-DB-A64O	0.0230083	0	0	0	0	0.107417	0	0	0	0	0.0595447	0	0.383943	0	0	0.304917	0	0.00129975	0.119871	0	0	0	0.3	0.0489452	1.0823
TCGA-DB-A64P	0.0391896	0	0	0	0.0227003	0.0564125	0	0.0242676	0	0	0	0.0511943	0.341028	0	0.0346614	0.366208	0	0	0	0.0446068	0.0197314	0	0.21	0.0694806	1.07759
TCGA-DB-A64Q	0.0210246	0	0	0.00696533	0.0254925	0.00442151	0.0123934	0.0244761	0	0	0.159518	0	0.408417	0	0	0.308155	0	0	0	0	0.0291368	0	0.21	0.0719373	1.0837
TCGA-DB-A64R	0	0	0	0	0.0956839	0.03059	0	0.0295201	0	0	0	0.123644	0.268828	0	0	0.253392	0	0	0	0.18903	0.00931339	0	0.77	-0.0138	1.11916
TCGA-DB-A64S	0.00173974	0	0.00618642	0	0	0.14516	0	0.0142643	0	0	0	0.0604774	0.351935	0	0.00707897	0.145623	0.00129852	0	0	0.250481	0.011107	0.00464903	0.03	0.241509	1.00535
TCGA-DB-A64U	0.00922774	0	0	0	0	0.0729442	0	0.0368972	0	0	0	0.0756724	0.39344	0	0	0.153272	0	0	0	0.189627	0.0689196	0	0.3	0.0497253	1.09546
TCGA-DB-A64V	0.0008	0	0	0.0651875	0	0.0734191	0	0.0109262	0.00249781	0.0113079	0	0.0503053	0.105727	0.0877202	0.0198058	0.541621	0.00121574	0	0.0276004	0	0.00185964	0	0.04	0.218319	1.01528
TCGA-DB-A64W	0.0966301	0	0	0	0.0661321	0.0945944	0	0.0340732	0	0	0.108349	0.042413	0.289381	0	0	0.221111	0	0	0.001	0	0.0463166	0	0.99	-0.0662	1.1148
TCGA-DB-A64X	0	0.00450302	0	0	0.0123095	0.141163	0	0	0	0	0.0469471	0	0.0275443	0	0.0390242	0.688305	0	0	0	0.0309811	0	0.00922302	0.24	0.0624723	1.10181
TCGA-DB-A75K	0	0.00652776	0.00131696	0	0	0.0177913	0	0.0705632	0	0	0	0.0518808	0.537422	0.050532	0.0269554	0	0	0	0	0.173621	0.0633898	0	0.27	0.0561394	1.10855
TCGA-DB-A75L	0.00656838	0	0.00457994	0	0.0369879	0.0778706	0	0.00486183	0	0	0.0845067	0	0.459135	0	0	0.285247	0	0	0.0402419	0	0	0	0.13	0.108074	1.06778
TCGA-DB-A75M	0	0.00290378	0.001	0.0159981	0	0.0988132	0	0	0.00437687	0	0	0.0387453	0.379201	0	0.00248628	0.379612	0	0	0.0768761	0	0	0	0.1	0.119494	1.06001
TCGA-DB-A75O	0	0.00290888	0.00111497	0.0193437	0	0.0509677	0	0	0.0038275	0	0.0496864	0.0006	0.322311	0	0	0.3683	0	0.0004	0.170611	0	0.0001	0.00983552	0.09	0.121123	1.05335
TCGA-DB-A75P	0.0755243	0	0	0.130423	0	0.198355	0	0	0	0	0.00175909	0.0256365	0.202875	0	0.0146137	0.321074	0	0	0.0297388	0	0	0	0.45	0.0264806	1.07551
TCGA-DH-5140	0	0	0	0.108044	0	0.142981	0	0	0.0169046	0	0	0.034884	0.0618879	0.137139	0.0540726	0.273303	0.0244558	0	0.137207	0	0.00911994	0	0.43	0.0333702	1.06962
TCGA-DH-5141	0	0	0.00565269	0.012132	0	0.0537759	0	0.0147476	0	0	0	0.0578104	0.0301554	0	0.085138	0.471805	0.00840902	0	0	0.246502	0.0138721	0	0.25	0.0581324	1.10721
TCGA-DH-5142	0.00487856	0.00241417	0	0.0197421	0	0.0969101	0	0	0.00867279	0	0	0.0419197	0.37895	0	0.013172	0.373378	0	0	0.0599631	0	0	0	0.02	0.307366	0.968544
TCGA-DH-5143	0	0	0	0	0	0.109605	0	0.00837583	0	0	0	0.0507853	0.530287	0	0	0.165638	0	0.0089964	0	0.111425	0.0148864	0	0.05	0.158606	1.05376
TCGA-DH-5144	0	0	0.0007	0.0183346	0	0.0347804	0	0.00667313	0	0	0	0.0778045	0.221518	0	0.0107711	0.467494	0	0	0	0.0925487	0.0693298	0	0.43	0.0329345	1.10216
TCGA-DH-A669	0	0.0116657	0	0.0324216	0	0.154737	0	0.040885	0	0	0	0.0783504	0.0023781	0	0.109602	0.390251	0.0005	0	0.150911	0	0.0110312	0.0173073	0.21	0.0710133	1.0604
TCGA-DH-A66B	0.0016075	0.0186238	0	0.0391089	0	0.122934	0	0	0.0100864	0	0.0613759	0.0163763	0.264348	0	0.0150099	0.416959	0	0	0	0.0321327	0.0004	0.00103857	0.03	0.226312	1.00188
TCGA-DH-A66D	0	0.00203129	0.00136539	0	0	0.149287	0	0	0.00663338	0	0	0.0519614	0.41818	0	0.0052627	0.23375	0	0	0	0.10398	0.025084	0.00246452	0.07	0.13901	1.04893
TCGA-DH-A66F	0	0.0232573	0.0518034	0	0.057085	0	0.0729551	0	0	0	0.0474159	0	0.0011301	0	0	0.430875	0.00150017	0	0.30759	0	0.00355791	0.00282932	0.49	0.0217417	1.08671
TCGA-DH-A66G	0	0	0.00325008	0.036017	0	0.0546197	0	0.0174906	0	0	0	0.0290602	0.321943	0	0.00852321	0.200455	0	0	0	0.258447	0.0701945	0	0.13	0.0991053	1.07647
TCGA-DH-A7UR	0	0	0.0222058	0	0	0.263391	0	0.0728327	0.0235323	0	0	0.129338	0.103281	0.0645425	0.082001	0.132053	0.00386197	0	0.0987207	0	0	0.00423984	0.73	-0.0074	1.08961
TCGA-DH-A7US	0.0635622	0	0	0.00305401	0.001005	0.0322999	0	0	0	0	0.0701924	0	0.144972	0	0.0452097	0.58254	0	0	0.057165	0	0	0	0.29	0.0556295	1.09084
TCGA-DH-A7UT	0.0129317	0	0	0	0.00524684	0.103932	0	0.0122634	0	0	0	0.0809111	0.472129	0	0	0.241461	0	0	0	0.0420628	0.0290613	0	0.13	0.103034	1.07349
TCGA-DH-A7UU	0	0.00114781	0.0001	0	0	0.23477	0	0.0018652	0	0	0	0.182325	0.256066	0	0.0100841	0.161298	0.0003	0	0	0.117926	0.0324358	0.0016402	0.21	0.0688355	1.08133
TCGA-DH-A7UV	0	0.00415413	0	0	0.0426759	0.0589589	0	0	0.00524487	0	0	0.0929184	0.299559	0	0	0.441965	0	0.0004	0	0.0476618	0.00190491	0.00457049	0.07	0.149762	1.04848
TCGA-DU-5847	0.0210688	0	0.0007	0.00982308	0	0.295951	0	0	0.0006	0	0	0.0417318	0.213994	0	0.111879	0.221215	0	0	0.0574861	0	0.0255534	0	0.43	0.0329924	1.07174
TCGA-DU-5849	0.00890023	0	0	0.0728408	0	0.0009	0	0.0668884	0	0	0	0.0605113	0.0888192	0.191115	0.0573229	0.397679	0	0	0	0.0497428	0	0.00524938	0.32	0.0440627	1.09459
TCGA-DU-5852	0	0.00634232	0	0.0742643	0	0.170175	0	0.0127512	0.0275685	0	0.00322335	0.0404353	0.170965	0.0532658	0.0597829	0.282156	0.0120799	0	0.0709379	0	0.0001	0.015905	0.13	0.0979273	1.04333
TCGA-DU-5853	0.00247262	0	0.00214934	0.0491534	0	0.19055	0	0	0	0	0	0.0560521	0.236912	0	0.0574894	0.264059	0.00217385	0	0	0.10992	0.0228841	0.00618396	0.04	0.167187	1.02143
TCGA-DU-5854	0.00274034	0	0	0.0949188	0	0.13025	0	0	0	0	0	0.0437757	0.130621	0	0.00231954	0.384282	0	0	0.18995	0	0.00150758	0.0196345	0.3	0.0504296	1.06671
TCGA-DU-5855	0.0210961	0	0	0.00463895	0	0.0458858	0	0.00901102	0	0	0	0.0432382	0.416602	0	0	0.242757	0	0.00747112	0	0.163228	0.046072	0	0.04	0.219786	1.01769
TCGA-DU-5870	0.0006	0	0.0006	0	0.0240021	0.0619696	0.0207752	0	0	0	0.0873054	0	0.02978	0	0.0133517	0.592862	0.00613906	0	0.152784	0	0.00118976	0.00861401	0.69	-0.0007	1.10947
TCGA-DU-5871	0.0527513	0	0	0	0	0.0797917	0	0	0	0	0	0.0319913	0.472974	0	0	0.223431	0	0.0118726	0	0.118582	0.00277373	0.0058324	0.07	0.126395	1.0636
TCGA-DU-5872	0.0001	0.0143949	0.0247487	0.061794	0	0.10232	0	0.0094538	0	0	0	0.0644024	0.211086	0	0.0391152	0.401193	0	0	0	0.0379455	0.00371628	0.0296966	0.07	0.126139	1.04291
TCGA-DU-5874	0	0	0.00396001	0.00503672	0.131906	0	0	0.0550117	0	0	0.0517887	0	0.0806664	0	0.013066	0.54795	0	0	0.0462845	0	0.0550666	0.00926297	0.89	-0.0219	1.11097
TCGA-DU-6392	0.0055174	0	0.00550592	0	0	0.114459	0	0.0220827	0.0119875	0	0.0118999	0.069213	0	0.326199	0.0133729	0.317913	0	0	0	0.0849413	0	0.0169087	0.04	0.167319	1.05069
TCGA-DU-6393	0	0.0221568	0.0117917	0.0100296	0	0.106068	0	0.039646	0	0	0.0688043	0.0231891	0.197859	0	0.0116491	0.508807	0	0	0	0	0	0	0.76	-0.0134	1.11226
TCGA-DU-6394	0.00905071	0	0	0	0.0366329	0.0558976	0	0	0	0	0.121134	0	0.026726	0.168222	0.0209909	0.253158	0.0154971	0	0.261765	0	0.0008	0.0301068	0.32	0.0441804	1.07524
TCGA-DU-6395	0.00693327	0	0	0.0207343	0	0.120303	0	0.00877256	0.0213762	0	0.010434	0.0376212	0.159815	0	0.0013673	0.0452915	0	0	0	0.535103	0.0257204	0.00652837	0.02	0.345274	0.999841
TCGA-DU-6396	0.013635	0	0	0.042229	0	0.16067	0.00572286	0	0.00821642	0	0.102478	0.00605763	0.217423	0	0.0134975	0.346223	0	0.00720064	0.0655257	0	0	0.0111214	0.04	0.220006	0.996306
TCGA-DU-6397	0.0007	0	0	0.0865668	0	0.106718	0	0.00360106	0.0365251	0	0.0735719	0.126026	0.0907768	0.0124763	0.00678444	0.33511	0.0001	0	0.111143	0	0	0.0099413	0.66	0.00209796	1.09756
TCGA-DU-6399	0.031725	0	0	0.00228411	0	0.0719576	0	0	0	0	0	0.0432509	0.344315	0	0.00619959	0.43297	0	0	0	0.0549162	0	0.012381	0.07	0.141384	1.05627
TCGA-DU-6400	0	0.004602	0	0.00770254	0	0.213177	0	0.0778004	0	0	0	0.128811	0.0321027	0.17279	0.0901689	0.226207	0.00919669	0	0	0	0	0.0374415	0.5	0.0193991	1.09436
TCGA-DU-6401	0.0200613	0	0	0	0	0.0671917	0	0.0247022	0	0	0	0.0679461	0.324928	0	0.082206	0.0778435	0	0.00538892	0	0.236709	0.0767516	0.0162716	0.04	0.196668	1.02806
TCGA-DU-6402	0.0008	0	0	0.10114	0	0.153042	0	0	0	0	0.035373	0	0.0979295	0.287765	0.0367552	0.258421	0	0	0.0287482	0	0	0	0.13	0.107757	1.06079
TCGA-DU-6403	0.0004	0.00402556	0	0.0609501	0	0.248279	0	0.00455681	0.0006	0	0.0429174	0.0650247	0.19385	0.0404014	0.0119743	0.259861	0	0	0.0570324	0	0.0009	0.00924072	0.13	0.0959029	1.04881
TCGA-DU-6404	0	0.00333844	0.00213198	0	0	0.308284	0	0.00996035	0.029535	0	0.0457487	0.0417444	0.0903667	0.28679	0.0485563	0.0889548	0.0106763	0	0.0132374	0	0.0003	0.0204175	0.13	0.0995054	1.05815
TCGA-DU-6405	0	0.0204249	0.00733438	0	0	0.287711	0	0.0136425	0.0529424	0	0.0593306	0.0746384	0.121696	0	0.0117166	0.322833	0.00502335	0	0.00653334	0	0	0.016174	0.58	0.0127046	1.08793
TCGA-DU-6406	0	0	0	0	0	0.112118	0	0.0163464	0.0144038	0	0	0.0324604	0	0.384252	0.0624912	0.326397	0	0	0.0463657	0	0	0.00516539	0.04	0.192795	1.04501
TCGA-DU-6407	0	0.00655701	0.0017467	0	0.0409884	0.00749647	0.0164244	0	0.0006	0	0.0878277	0	0.438602	0	0.0135955	0.303043	0	0	0.0762537	0	0.00145521	0.00540034	0.25	0.0573625	1.09046
TCGA-DU-6408	0	0	0.00641911	0	0	0.162531	0	0.0124772	0	0	0	0.0661064	0.264146	0	0.00461496	0.255783	0	0	0	0.197567	0.0231499	0.0072038	0.06	0.151233	1.03887
TCGA-DU-6410	0	0.0276374	0	0	0.0410947	0	0	0.094152	0	0	0.106791	0.00772021	0.042612	0.193869	0	0.328834	0	0	0.0246115	0	0.132678	0	1	-0.0782	1.12885
TCGA-DU-6542	0	0.00388568	0.0009	0	0.00921011	0.100634	0.00279104	0	0	0	0.0523654	0.00683212	0.320586	0	0	0.338662	0	0.00146687	0.145445	0	0	0.0171919	0.06	0.154593	1.03355
TCGA-DU-7006	0	0.00550126	0	0.041174	0	0.0386231	0.0007	0	0.0095022	0.00324386	0	0	0.38558	0	0.00515931	0.372486	0	0	0.128072	0	0	0.00991817	0.4	0.0354262	1.10219
TCGA-DU-7007	0.0815809	0	0.0262533	0.055211	0	0.116234	0	0	0.00222346	0	0	0.0124937	0.224692	0	0.033308	0.432185	0	0	0	0.0137853	0	0.00203332	0.07	0.125615	1.04399
TCGA-DU-7008	0.0770281	0	0.0983767	0.0523458	0	0.00615456	0	0	0	0	0	0.0273475	0.48074	0	0.0003	0.22383	0	0.00108493	0	0.0327428	0	0	0.04	0.185989	1.03509
TCGA-DU-7009	0	0.0149584	0	0.0347326	0	0.0243948	0	0.0547171	0	0	0	0.0330707	0.397996	0.00102796	0.00258696	0.223549	0	0	0	0.168929	0.0440372	0	0.54	0.0167442	1.10747
TCGA-DU-7010	0.001	0	0.0063529	0.0387145	0	0.188181	0	0	0.0157119	0	0.0009	0.0477875	0.175738	0	0.0750771	0.309571	0.00868517	0	0.126222	0	0.00612915	0	0.25	0.0586814	1.05733
TCGA-DU-7011	0.0066604	0.0126734	0	0	0	0.118732	0.021812	0	0.00571252	0	0.0601337	0	0.351896	0	0.00660052	0.383298	0.00299727	0	0.00787723	0	0.0121225	0.00948375	0.02	0.289968	0.976105
TCGA-DU-7012	0.0481968	0	0	0.0470324	0	0.216739	0.00113144	0.0249639	0.0107577	0.00572638	0	0	0.217556	0	0.109489	0.263533	0.00724589	0	0.0476289	0	0	0	0.04	0.176137	1.01404
TCGA-DU-7013	0.00158286	0.0006	0	0.104043	0	0.180757	0	0.00680385	0.0247886	0	0	0.0407878	0.0600938	0.0810993	0.0415135	0.294072	0.00195719	0	0.153105	0	0	0.00879592	0.21	0.0699089	1.05407
TCGA-DU-7014	0.0230937	0	0	0.0194131	0	0.10869	0	0	0	0	0.0350499	0.0216875	0.287702	0	0.0305239	0.398974	0	0	0.0652	0	0	0.00966606	0.12	0.111548	1.05245
TCGA-DU-7015	0.001511	0.0295797	0	0	0.00682731	0.0893995	0.0003	0	0.00560522	0	0.0332425	0	0.385889	0	0.0495013	0.236373	0	0	0.16038	0	0	0.00140079	0.04	0.199077	1.01252
TCGA-DU-7018	0	0.00940745	0	0	0.00492244	0.103121	0	0	0	0	0.00685805	0.0458778	0.101536	0	0.0506074	0.478724	0	0	0	0.195556	0	0.00339108	0.97	-0.0421	1.13811
TCGA-DU-7019	0	0	0.00152492	0	0	0.0930852	0	0.00739409	0	0	0	0.052612	0.209721	0	0.0939893	0.323365	0.00283302	0	0	0.131228	0.0842465	0	0.04	0.161201	1.03255
TCGA-DU-7290	0	0.0046381	0.0007	0.00409163	0	0.0876529	0.00243879	0.00752533	0	0	0.001682	0.00844245	0.419545	0	0.00881596	0.242961	0	0.0039514	0	0.111872	0.0913977	0.0042856	0.15	0.0874269	1.0771
TCGA-DU-7292	0	0	0	0.0891639	0	0.155822	0	0.00237124	0	0	0	0.0349964	0.144769	0	0.0682227	0.338665	0	0	0.139572	0	0	0.0264177	0.65	0.00243351	1.08132
TCGA-DU-7294	0.00417311	0	0	0	0.0328324	0.11992	0	0	0	0	0.0640555	0	0.109889	0.0863365	0.0453166	0.217485	0.0113895	0	0.250253	0	0.0108714	0.0474776	0.55	0.0162765	1.07553
TCGA-DU-7298	0	0.00204842	0.0007	0	0	0.203517	0	0.0172584	0	0	0	0.101652	0.162793	0	0.00779764	0.226933	0	0.00144268	0	0.157921	0.0955387	0.0224414	0.13	0.110579	1.0501
TCGA-DU-7299	0.0001	0	0	0.0212384	0	0.075177	0	0.00615047	0	0	0.055218	0	0.259	0	0.0008	0.318739	0	0	0.254626	0	0	0.00895981	0.21	0.0713844	1.06788
TCGA-DU-7300	0	0	0	0.141585	0	0.157051	0	0.0323948	0	0	0.0151966	0.0353272	0.0543982	0.0641547	0.0418261	0.332007	0.00723377	0	0.111501	0	0.00731908	0	0.24	0.0654108	1.0581
TCGA-DU-7301	0	0	0.0004	0	0	0.0677454	0	0.00631589	0	0	0	0.0211597	0.213336	0	0.00406433	0.657774	0	0.00598565	0	0.0223607	0	0.0009	0.04	0.211989	1.0378
TCGA-DU-7302	0	0.00979433	0	0	0.0167873	0.210751	0	0	0	0	0.0525496	0	0.147628	0.076648	0.048818	0.164555	0.0005	0	0.228455	0	0.00159096	0.0418791	0.74	-0.0109	1.08162
TCGA-DU-7304	0.00794461	0.0018308	0	0	0.0828191	0.176527	0	0.0145121	0	0	0.0850525	0.0172729	0.0494983	0.020593	0.0145555	0.325335	0.0123088	0	0.19175	0	0	0	0.62	0.00399118	1.07811
TCGA-DU-7306	0.0234246	0	0.00386013	0	0	0.131108	0	0	0	0	0	0.0297773	0.254366	0	0.0184464	0.356918	0	0.00600833	0.161985	0	0	0.0141075	0.25	0.058567	1.06772
TCGA-DU-7309	0.00434531	0	0	0	0.00213911	0.0428719	0	0.0123023	0	0	0	0.0249725	0.475261	0	0.0219975	0.203394	0	0	0	0.121839	0.0510045	0.0398729	0.13	0.0987235	1.0858
TCGA-DU-8158	0	0.00585982	0	0.145288	0	0.0728687	0.00194623	0	0.00198864	0.0191538	0	0	0.203465	0	0.012939	0.411278	0	0	0.107067	0	0	0.0181458	0.13	0.0958143	1.05322
TCGA-DU-8161	0.0067849	0	0	0.0560265	0	0.15046	0.0072354	0.0199394	0	0	0	0.00664535	0.199141	0	0.135526	0.346706	0	0.00367533	0.0654976	0	0.00236097	0	0.19	0.079495	1.06192
TCGA-DU-8162	0.0411157	0	0	0.0251347	0	0.0639337	0	0	0	0	0	0.0349053	0.386761	0	0.00712207	0.150844	0	0	0	0.222154	0.0680301	0	0.32	0.0444489	1.09915
TCGA-DU-8163	0	0.0004	0.00243168	0	0	0.276518	0	0	0	0	0.0119993	0.0269934	0.459267	0	0.00440874	0.0821771	0	0	0.096471	0	0.0304709	0.00886575	0.04	0.190492	1.02082
TCGA-DU-8164	0	0.0139052	0	0.0356642	0.0245743	0	0	0.0353613	0	0	0	0.0612807	0.290508	0	0.0005	0.346225	0	0	0	0.1576	0.0344	0	0.62	0.00867641	1.10812
TCGA-DU-8165	0	0.0178345	0.00168468	0.103769	0	0.114762	0.0249822	0.048498	0.00774786	0	0	0	0.0974104	0.0728291	0.0537131	0.398945	0.00103333	0	0	0.0324057	0	0.0243846	0.04	0.16549	1.02356
TCGA-DU-8166	0	0	0	0	0	0.054439	0	0.0138065	0	0	0	0.0214574	0.370714	0	0.0309469	0.131079	0	0.00307357	0	0.285128	0.0668025	0.0225535	0.04	0.188876	1.04357
TCGA-DU-8167	0.0039016	0	0.00345551	0	0	0.17726	0	0.0158068	0	0	0	0.0805947	0.270386	0	0.0232438	0.155305	0.0008	0	0	0.253386	0.0133485	0.00250886	0	0.466701	0.884147
TCGA-DU-8168	0.00535304	0	0	0.0281293	0	0.396009	0	0.0409351	0.00858477	0	0	0.156182	0.148221	0	0.025907	0.162844	0.00797259	0	0.0103891	0	0.00639425	0.00307823	0.62	0.00499947	1.11153
TCGA-DU-A5TP	0.00569722	0	0	0.0195093	0	0.0339395	0	0.00706014	0	0	0	0.030181	0.298544	0	0.0173803	0.31669	0	0	0	0.178224	0.0927744	0	0.02	0.289804	0.978892
TCGA-DU-A5TR	0.0311164	0	0.00727011	0.0980033	0	0.0353849	0	0.00916201	0	0	0	0.0748325	0.354216	0	0.0119898	0.251509	0	0	0	0.0591231	0.0673928	0	0.02	0.288943	0.971911
TCGA-DU-A5TS	0.0001	0.00773466	0	0.0141679	0	0.205669	0	0.0100537	0.0253713	0	0.107184	0.0329437	0.108111	0	0.00172764	0.343271	0	0	0.134085	0	0.00468717	0.0049354	0.18	0.0843463	1.05022
TCGA-DU-A5TT	0	0.010954	0.00403121	0	0	0.0891633	0	0.0568249	0	0	0	0.0275468	0.236918	0	0.0319439	0.407894	0	0	0	0.0777889	0.0495916	0.0073435	0.18	0.0834036	1.06495
TCGA-DU-A5TU	0	0.0183419	0.00634038	0.022682	0.0741528	0	0.00171569	0	0	0	0.0476967	0	0.37552	0.0486356	0.0115056	0.374535	0	0	0.00963629	0	0	0.00923792	0.03	0.236619	1.00754
TCGA-DU-A5TW	0	0.00387393	0	0	0.0370227	0.106685	0	0	0.00200747	0	0	0.0312695	0.0799417	0	0.00409264	0.559362	0	0	0.15329	0	0	0.0224554	0.21	0.0698064	1.07681
TCGA-DU-A5TY	0.0244342	0	0.00311994	0.018851	0	0.0651705	0	0.0147048	0	0	0	0.0443697	0.0775897	0.29982	0.0426612	0.3599	0	0	0	0.0110397	0.0383391	0	0.03	0.222222	1.02037
TCGA-DU-A6S2	0.0281974	0	0.00331492	0.0339985	0	0.100273	0	0.0225021	0	0	0	0.0874334	0.0211978	0	0.00618351	0.0316821	0	0	0	0.605447	0.0291286	0.0306422	0.21	0.0754375	1.22106
TCGA-DU-A6S3	0.0157262	0	0.0283804	0.0218026	0	0.18154	0	0.0122401	0	0	0.14607	0	0.166814	0.150089	0.0260961	0.0465086	0	0	0.192849	0	0.0118833	0	0.94	-0.0338	1.08893
TCGA-DU-A6S6	0.0103376	0	0	0.0918004	0	0.210275	0	0.0599177	0	0.0128387	0.0168634	0	0.0881767	0.0806723	0.00592654	0.218019	0	0.00177027	0.18472	0	0.0142949	0.0043881	0.65	0.0026747	1.07865
TCGA-DU-A6S7	0	0.00535748	0	0	0	0.121012	0	0.00623693	0	0	0.00956054	0.0866361	0.569473	0	0	0.188159	0	0	0	0.00856498	0.0026195	0.00238122	0.06	0.155497	1.06244
TCGA-DU-A6S8	0	0.00836517	0	0	0	0.255863	0	0.0155862	0.046536	0	0	0.0626178	0.0861012	0	0	0.405039	0	0	0.116489	0	0.00340264	0	0.69	-0.0032	1.08848
TCGA-DU-A76K	0	0.0116324	0	0	0	0.101094	0	0.0541391	0	0	0	0.185568	0.0703102	0	0.083763	0.121012	0	0	0	0.310375	0.062107	0	0.81	-0.0146	1.16619
TCGA-DU-A76L	0.0139023	0	0	0	0	0.136182	0	0.0152663	0.00513804	0	0	0.0753985	0.00845556	0.433217	0.017379	0.195127	0	0	0	0.0775209	0.00151832	0.0208953	0.02	0.304644	0.984827
TCGA-DU-A76O	0.00176419	0	0	0.00730522	0	0.0733869	0	0	0.00282205	0	0.0181512	0.0140482	0.350837	0	0	0.447531	0	0	0.0841543	0	0	0	0.04	0.220202	1.01679
TCGA-DU-A76R	0	0.0138707	0.0006	0	0	0.137061	0	0.0130272	0	0	0.0637549	0.0160285	0.309084	0	0.00849577	0.312988	0	0	0.0672531	0	0.0578516	0	0.12	0.115062	1.0446
TCGA-DU-A7T6	0	0.0322309	0	0.050197	0	0.0427036	0	0.0403431	0	0	0	0.0619012	0.0211422	0.205331	0.0572957	0.416998	0	0	0	0.0715088	0.0002	0.0001	0.12	0.114101	1.06598
TCGA-DU-A7T8	0	0.0003	0.00225154	0	0	0.172211	0	0.0183006	0	0	0	0.0874552	0.261984	0	0.0959321	0.136882	0	0	0	0.177624	0.0362844	0.0107446	0.09	0.123384	1.05034
TCGA-DU-A7TA	0	0.00320379	0.00402433	0.00242806	0	0.0920562	0	0.0112071	0	0	0.0004	0.0528544	0.246973	0	0.00823354	0.386309	0	0.00845121	0	0.173351	0.00737893	0.00315773	0.04	0.221358	1.01096
TCGA-DU-A7TB	0	0.0148301	0	0.0311025	0	0.162869	0	0.0004	0.0247448	0	0	0.0889204	0.132185	0.0001	0.00705237	0.259577	0.00806398	0	0.259473	0	0.0019632	0.00870156	0.88	-0.021	1.0923
TCGA-DU-A7TC	0	0.00320266	0	0.0345436	0.0236761	0.00386696	0.0343701	0	0.00142315	0	0.108764	0	0.113347	0	0.0100283	0.433687	0	0	0.231048	0	0.0020425	0	0.53	0.017841	1.08723
TCGA-DU-A7TD	0.035514	0	0	0	0	0.155168	0	0.0433164	0	0	0	0.0860254	0.244862	0.0373583	0.0632609	0.297964	0	0	0	0.0165604	0.0135286	0.00644094	0.13	0.0960408	1.05205
TCGA-DU-A7TG	0.00649941	0	0	0.00941464	0	0.0283835	0	0.0306392	0	0	0	0.0463339	0.374403	0.0225515	0.0184401	0	0	0	0	0.227208	0.177352	0.0587744	0.14	0.0931904	1.09056
TCGA-DU-A7TI	0.0120725	0	0.00203088	0.00888724	0	0.0284816	0	0.0251516	0	0	0	0.0209188	0.200953	0	0.0332773	0.363875	0	0	0	0.278476	0.0258762	0	0.03	0.237157	1.01417
TCGA-DU-A7TJ	0	0.0125168	0.0005	0.0482904	0	0.191231	0	0.00257876	0.0484315	0	0.0449173	0.0631145	0.090464	0	0.0144651	0.311221	0.00492996	0	0.148085	0	0.00523945	0.0139672	0.5	0.0198767	1.07287
TCGA-E1-5302	0	0.0100872	0.00146817	0	0	0.231979	0	0	0.0124344	0	0.0571932	0	0.356251	0	0.0246051	0.162692	0	0	0.139692	0	0	0.0035989	0.07	0.135581	1.03258
TCGA-E1-5303	0.00184017	0.00132068	0.0010838	0	0	0.19498	0	0.015194	0	0	0.013712	0.0652185	0.488226	0	0	0.126751	0	0	0	0.0383959	0.0532777	0	0.04	0.19932	1.02323
TCGA-E1-5304	0	0.0112524	0	0.0485503	0	0.275966	0	0.0136824	0.00560229	0	0	0.0623586	0.0828329	0.054136	0.0124442	0.168348	0.00954418	0	0.248905	0	0.00637746	0	0.62	0.00546071	1.08137
TCGA-E1-5305	0	0.0100624	0	0	0	0.0845115	0.0146241	0	0.00211803	0	0.0350428	0	0.330372	0.0359949	0.0103832	0.207768	0	0	0.216989	0	0	0.0521336	0.24	0.0600983	1.07488
TCGA-E1-5307	0	0.00565773	0	0	0.0250709	0.15805	0	0	0.011857	0	0.085253	0.0011597	0.138089	0	0.00111872	0.422756	0.0007	0	0.054998	0	0.0924618	0.00283826	0.07	0.143667	1.02972
TCGA-E1-5311	0.0473815	0	0	0	0.0851277	0.0277257	0	0	0	0	0	0.0792902	0.331088	0	0.0255434	0.165434	0	0	0	0.136028	0.0909645	0.0114165	0.8	-0.0141	1.10638
TCGA-E1-5318	0.00457328	0.00181829	0	0	0.028978	0.291356	0	0	0.0184551	0	0.0363453	0.0111237	0.0701329	0	0	0.439231	0.00156307	0	0.0904943	0	0.00592864	0	0.4	0.0341113	1.07678
TCGA-E1-5319	0	0	0.00346516	0.0298003	0	0.0947686	0	0	0	0	0.0354358	0.00475122	0.0201147	0.0844646	0.0373881	0.449328	0.0124798	0	0.224286	0	0	0.00371819	0.29	0.0545242	1.07746
TCGA-E1-5322	0	0.00349741	0.00142093	0	0.0231599	0.101054	0	0	0.00838255	0	0	0.0736036	0.507928	0	0	0.204184	0	0.0082187	0	0.0548816	0.00792377	0.00574558	0.04	0.190739	1.0344
TCGA-E1-A7YD	0.0538474	0	0.00825636	0.015899	0	0.154653	0	0.102082	0	0	0	0.106684	0.163345	0	0.0826995	0.157171	0	0	0	0.0652429	0.0901213	0	0.4	0.0342075	1.07093
TCGA-E1-A7YE	0	0	0.00154423	0.00523643	0	0.0720403	0	0.0273421	0	0	0	0.0464311	0.343066	0	0	0.297293	0	0	0	0.122202	0.0848452	0	0.04	0.216057	1.01179
TCGA-E1-A7YH	0.0004	0.00588803	0	0.0198611	0	0.0510803	0	0	0	0	0.0211437	0	0.190196	0	0	0.47295	0	0.0006	0.236479	0	0.00147768	0	0.29	0.0529676	1.087
TCGA-E1-A7YI	0.0006	0	0	0.0602793	0	0.283046	0	0.0187762	0.0130167	0	0	0.0908005	0.13392	0.0412368	0	0.132518	0	0	0.202209	0	0.00722641	0.0163716	0.49	0.0216468	1.0787
TCGA-E1-A7YJ	0	0.00110014	0	0.0799247	0	0.14759	0	0.0117973	0.0123682	0	0.0228729	0.0140897	0.0891766	0	0.0614357	0.449423	0	0	0.0913726	0	0.0009	0.0179779	0.15	0.091313	1.05245
TCGA-E1-A7YK	0.0202197	0	0	0.0214113	0	0.078729	0.00409611	0	0.00516463	0	0.0298781	0	0.333681	0	0.0023278	0.45618	0	0	0.0483131	0	0	0	0.03	0.239758	1.00484
TCGA-E1-A7YL	0	0.04654	0	0.0889206	0	0.147731	0.001	0.0185793	0	0	0.00937516	0.025108	0.225233	0.0259421	0	0.239394	0	0	0.141158	0	0.00124158	0.0298026	0.25	0.0587164	1.05658
TCGA-E1-A7YM	0.0155674	0	0	0	0.0154691	0.175497	0	0	0.00300383	0	0.125724	0.0136144	0.253699	0	0.00245379	0.25012	0	0	0.0719035	0	0.072068	0.0009	0.45	0.0266029	1.07292
TCGA-E1-A7YN	0.034628	0	0.0009	0.0517564	0	0.191089	0.0153053	0	0	0	0.0461466	0	0.215806	0	0.0401241	0.379095	0	0	0.0251182	0	0	0	0.09	0.124432	1.03783
TCGA-E1-A7YO	0	0.00790635	0.012284	0.0497478	0	0	0	0.0887659	0	0	0	0.0551681	0.215949	0	0.066163	0.296995	0	0	0	0.114224	0.0927972	0	0.74	-0.0092	1.09596
TCGA-E1-A7YQ	0	0	0.00277335	0	0	0.132187	0	0.00338834	0	0	0.00323214	0.0331527	0.299268	0.0121375	0.0685986	0.396407	0	0	0	0.001	0.0448199	0.00304101	0.04	0.165771	1.03517
TCGA-E1-A7YS	0.029845	0	0	0	0	0.217249	0	0.16747	0	0	0	0.106387	0.104906	0	0	0.3025	0	0.0052071	0	0.00942358	0.0554522	0.00155986	0.82	-0.016	1.09983
TCGA-E1-A7YU	0	0.0139403	0.00359966	0.0589106	0	0	0	0	0	0	0.201605	0	0.231362	0	0.0039749	0.244937	0	0	0.230939	0	0	0.0107323	0.58	0.0104702	1.09243
TCGA-E1-A7YV	0.164893	0	0.0237033	0.0375864	0	0.0836934	0	0.0542191	0	0	0.0187049	0.0589501	0.125034	0	0.0938426	0.0651552	0	0	0	0.0748651	0.0621641	0.137189	0.76	-0.0123	1.09987
TCGA-E1-A7YW	0	0	0	0	0.0248333	0.0656016	0	0	0	0	0.014735	0.0188575	0.47127	0	0	0.250815	0	0	0	0.149095	0.0047929	0	0.17	0.0846732	1.08971
TCGA-E1-A7YY	0.0025147	0	0.00205106	0.00827915	0.00422259	0.167986	0	0.01584	0	0	0	0.134979	0.077428	0	0.196532	0.221251	0.0222824	0	0.14063	0	0.00600371	0	0.69	-0.0027	1.10957
TCGA-E1-A7Z2	0	0	0	0	0	0.107178	0	0.0812057	0	0	0.0362289	0.052657	0.305775	0	0.00583563	0.286989	0	0	0.122054	0	0	0.00207559	0.58	0.0107763	1.08548
TCGA-E1-A7Z3	0.00895555	0	0	0.0221941	0.0132854	0.0359573	0	0	0	0	0.0139377	0	0.489346	0	0.0124019	0.201186	0	0	0.195296	0	0.0002	0.00728355	0.2	0.0772785	1.08722
TCGA-E1-A7Z4	0	0.00362799	0.00770228	0	0	0.13604	0	0.00930128	0	0	0	0.0648319	0.399092	0	0.00858435	0.244249	0	0	0	0.110917	0.0156533	0	0.07	0.140721	1.04646
TCGA-E1-A7Z6	0.0368912	0	0	0	0.0222412	0.0616176	0	0	0	0	0	0.0535809	0.581234	0	0.00940126	0.194623	0	0	0	0.0343291	0.00608121	0	0.09	0.12423	1.07953
TCGA-EZ-7264	0	0.00714505	0	0.00987197	0	0.117248	0	0.0350726	0	0	0.00123028	0.0105653	0.290497	0	0.0319387	0.378565	0	0	0	0.0898697	0.0279965	0	0.93	-0.0259	1.11424
TCGA-F6-A8O3	0	0.0173695	0	0.0344863	0	0.0464403	0	0	0	0	0	0.0642281	0.2709	0	0.0308683	0.394813	0	0	0	0.140894	0	0	0.83	-0.0167	1.1213
TCGA-F6-A8O4	0	0.0138469	0	0.00117897	0.0039444	0.0233946	0	0.0223618	0	0	0	0.0325031	0.325836	0	0.015512	0.334872	0	0	0	0.22655	0	0	0.43	0.0330363	1.1143
TCGA-FG-5962	0	0	0	0	0	0.12048	0	0.049577	0	0	0	0.0788827	0.309608	0	0.0620155	0.207179	0	0	0	0.13481	0.0374483	0	0.15	0.0866404	1.06257
TCGA-FG-5963	0.00909708	0	0	0.0556226	0	0.207645	0	0.0169515	0.00272006	0	0.13269	0	0.0658743	0.398504	0.0280567	0.0639569	0.00161617	0	0.0172648	0	0	0	0.15	0.08969	1.07743
TCGA-FG-5964	0	0.00363635	0	0.0399525	0	0.192988	0	0.0163902	0.002768	0	0.0649302	0.0543452	0.063054	0	0.00216117	0.550577	0.0004	0	0	0.00796655	0	0.0008	0.06	0.152263	1.04224
TCGA-FG-5965	0.0223208	0	0	0.013651	0	0.0814653	0	0.0192971	0	0	0	0.0557556	0.282258	0	0.0602409	0.0467299	0	0	0	0.241602	0.0673661	0.109313	0.07	0.145845	1.0566
TCGA-FG-6688	0	0.00743464	0.0005	0.00421631	0	0.0678967	0	0.00621154	0	0	0.0194818	0.0238481	0.3596	0	0.00724594	0.395079	0	0.0049814	0.100528	0	0.00157751	0.00137642	0.48	0.0240066	1.10266
TCGA-FG-6689	0	0.00244834	0.0035564	0	0	0.194283	0	0.00626997	0	0	0.0529895	0.05072	0.300898	0	0	0.16954	0	0	0	0.13097	0.0882764	0	0.17	0.0857253	1.05928
TCGA-FG-6690	0	0.00220542	0.00136242	0	0	0.202307	0	0	0	0	0	0.100779	0.190972	0	0.00202043	0.298996	0	0	0	0.175606	0.0168515	0.00890019	0.07	0.128245	1.04817
TCGA-FG-6691	0.00194037	0.00120675	0.00175516	0	0.00288174	0.127551	0	0	0.010363	0	0	0.0881358	0.413842	0	0	0.268266	0	0	0	0.0529373	0.0311213	0	0.03	0.257892	0.993315
TCGA-FG-6692	0	0	0	0.108784	0	0.226027	0	0.00840574	0	0	0.0189248	0.0287537	0.0670501	0	0.0811986	0.379453	0	0	0.0797764	0	0	0.00162641	0.37	0.0387994	1.0728
TCGA-FG-7634	0	0	0	0.00387792	0	0.108495	0	0.0115109	0	0	0.020792	0.00870978	0.192671	0.135122	0.0197373	0.398461	0	0	0	0.0246213	0.0760012	0	0.04	0.170969	1.0335
TCGA-FG-7636	0.00199984	0	0	0.00327511	0	0.0682199	0	0	0.00405256	0	0.078128	0	0.10594	0	0.0160875	0.385312	0	0	0.333348	0	0.00352887	0.0001	0.34	0.0427945	1.08553
TCGA-FG-7637	0.202933	0	0	0.0395406	0.0578493	0.00610942	0.0244355	0	0	0	0.105576	0	0.225288	0	0.0716202	0.251221	0	0	0	0	0.0142875	0.00113997	0.6	0.00891054	1.08457
TCGA-FG-7638	0	0.00368314	0.00286215	0.0804382	0	0.0900376	0	0	0	0	0	0.0185312	0.153834	0	0.0707496	0.339432	0.0292139	0	0.150782	0	0.0604366	0	0.35	0.0421698	1.06498
TCGA-FG-7641	0	0	0	0	0.181569	0.107172	0	0.0435135	0	0	0.160117	0	0.0937976	0	0	0.371122	0	0	0	0	0.0427089	0	0.35	0.0424458	1.07658
TCGA-FG-7643	0.0006	0	0	0.162139	0	0.162123	0.00999204	0.00461865	0.0299829	0	0	0	0.0528513	0.108786	0.0347131	0.0609348	0.0006	0	0.323994	0	0.0005	0.0481992	0.5	0.0194502	1.08647
TCGA-FG-8181	0	0	0.00867979	0.0365087	0	0.088916	0	0.0660046	0	0	0	0.0753224	0.270783	0.00338256	0.0805745	0.0844824	0	0	0	0.192607	0.0622117	0.0305274	0.49	0.0226065	1.09473
TCGA-FG-8182	0	0.00214223	0.0005	0	0	0.131234	0	0.0108165	0	0	0	0.047779	0.355836	0	0.00181412	0.123181	0	0	0	0.307055	0.0196023	0	0.03	0.241241	1.01468
TCGA-FG-8185	0	0.00148118	0	0.00140975	0.0208457	0.0103251	0	0.012535	0	0	0	0.0164924	0.365253	0	0.00190453	0.314072	0	0	0	0.194821	0.0608598	0	0.32	0.0452076	1.10854
TCGA-FG-8186	0	0	0	0	0	0.123748	0	0.010922	0	0	0	0.0437498	0.401726	0	0.0410275	0.17691	0	0	0	0.138823	0.0524691	0.0106249	0.04	0.196744	1.0209
TCGA-FG-8187	0	0.00215703	0	0	0	0.0507106	0	0.0403172	0	0.0002	0	0.0436842	0.404532	0	0.0454133	0.136013	0	0	0	0.234468	0.0424913	0	0.04	0.165293	1.04718
TCGA-FG-8188	0	0	0.0132141	0	0	0.0660787	0	0.0137168	0	0	0	0.095177	0.284528	0	0	0.337908	0	0	0	0.159015	0.030363	0	0.04	0.165499	1.03863
TCGA-FG-8189	0	0.0394944	0	0.0648347	0.145922	0	0	0.0391224	0	0	0	0.192729	0.237071	0.128886	0	0.0185071	0	0	0.093121	0	0.0403118	0	0.98	-0.0512	1.11966
TCGA-FG-8191	0.0402073	0	0	0.0204995	0	0.0221655	0	0.0233872	0	0.00267941	0	0.0159743	0.256261	0	0.0119888	0.29074	0	0.00809331	0	0.243621	0.0643823	0	0.04	0.180393	1.03366
TCGA-FG-A4MT	0.0239834	0	0	0	0.015381	0.0809241	0	0	0	0	0	0.075833	0.339085	0	0.0006	0.445134	0	0	0	0.0190882	0	0	0.13	0.0974828	1.07616
TCGA-FG-A4MU	0	0.00197958	0	0	0	0.161914	0	0.00115535	0.00251672	0	0.0099971	0.0151243	0.0274327	0.176448	0.043227	0.513869	0	0	0.0347945	0	0	0.0115419	0.07	0.131744	1.06273
TCGA-FG-A4MW	0.0249845	0	0	0	0	0.120154	0	0	0.00350917	0	0	0.0385987	0.1457	0	0.0805256	0.426332	0	0	0.0928981	0	0.0402238	0.0270736	0.43	0.0288829	1.08112
TCGA-FG-A4MX	0	0.00511783	0.00294425	0.0179066	0.0538586	0	0	0	0	0	0.0120969	0.0281467	0.300326	0	0.00953837	0.354779	0	0	0	0.150672	0.0646126	0	0.32	0.04402	1.09417
TCGA-FG-A4MY	0	0.0013492	0	0	0	0.345177	0	0.00331152	0	0	0	0.15925	0.0645072	0	0	0.299473	0	0	0	0.118112	0.00882013	0	0.24	0.0648776	1.08295
TCGA-FG-A60J	0	0.0162862	0.001	0.0080714	0	0.144128	0	0.0164606	0	0	0	0.0974269	0.249036	0	0.0100469	0.2835	0	0	0	0.136557	0.0375098	0	0.04	0.192659	1.01555
TCGA-FG-A60K	0.0207521	0	0	0	0.0242155	0.142709	0	0	0.0002	0	0.187285	0	0.195266	0	0.00259596	0.29628	0	0	0.0866774	0	0.0008	0.04325	0.56	0.0141905	1.08236
TCGA-FG-A60L	0.0255724	0	0	0.0238242	0	0.0853033	0	0.0195347	0	0	0	0.0816044	0.429505	0	0	0.231175	0	0	0	0.0868295	0.0134749	0.00317663	0.04	0.189669	1.02663
TCGA-FG-A6IZ	0	0.0257501	0	0	0	0.098117	0	0	0	0	0.00149033	0.0407058	0.34916	0	0.0385952	0.399501	0	0	0.0466802	0	0	0	0.17	0.0852512	1.07389
TCGA-FG-A6J1	0.0210468	0	0	0.0362608	0	0.0814679	0	0	0	0	0	0.0839986	0.416806	0	0	0.254445	0	0	0	0.0818222	0.00974941	0.014403	0.1	0.117673	1.06221
TCGA-FG-A6J3	0.00699193	0	0	0.128748	0	0.0490209	0	0.0223957	0	0	0	0.090442	0.25984	0	0.0330772	0.358107	0	0	0	0.0402039	0.0111738	0	0.04	0.214999	1.00622
TCGA-FG-A70Y	0.00273548	0.00402693	0.0005	0	0.0323414	0.0864603	0	0	0.00536571	0	0.0741415	0	0.354724	0	0.0004	0.373513	0	0	0.0651011	0	0.0007	0	0.07	0.145032	1.04294
TCGA-FG-A70Z	0.00179637	0.0290338	0	0	0	0.187877	0	0.00829691	0.00929831	0	0.059777	0.0249336	0.134412	0.194	0.0431901	0.288117	0	0	0.0122448	0	0	0.00702343	0.04	0.172398	1.02221
TCGA-FG-A710	0.00710733	0	0	0	0	0.161617	0	0.0124581	0	0	0	0.10331	0.294692	0	0.0735591	0.21462	0.00587858	0	0	0.115716	0.00793279	0.00311008	0.06	0.152828	1.03415
TCGA-FG-A711	0	0.00881952	0	0.00459203	0	0.148216	0	0	0.00363949	0	0.13252	0	0.46528	0.0123083	0	0.0961865	0	0.0208292	0.0984383	0	0	0.00917047	0.06	0.152826	1.03822
TCGA-FG-A713	0	0	0	0.101355	0.145361	0	0	0	0	0	0.0009	0	0.386458	0.0431714	0.0340122	0.182293	0	0	0.0269302	0	0.0794893	0	0.84	-0.0188	1.10715
TCGA-FG-A87N	0.0405385	0	0	0.0360766	0	0.18716	0	0.00913956	0.0006	0	0.0703584	0.0334672	0.239055	0	0	0.333131	0	0	0.0425247	0	0	0.00798929	0.38	0.0385851	1.07308
TCGA-FG-A87Q	0.0262041	0	0	0	0	0.164196	0	0	0	0	0	0.0536494	0.131505	0	0.123513	0.467251	0	0	0	0	0.0301622	0.00351907	0.09	0.124066	1.05227
TCGA-FN-7833	0	0	0.00182704	0	0	0.0854484	0	0.00876589	0	0	0	0.0318247	0.461238	0	0.0741672	0.206883	0	0	0	0.0934693	0.0363762	0	0.02	0.306693	0.972109
TCGA-HT-7467	0.0470298	0	0	0.0645222	0	0.0475832	0	0	0	0	0.100959	0	0.395151	0	0.0262936	0.19502	0	0	0.115557	0	0	0.00788545	0.74	-0.0095	1.09969
TCGA-HT-7468	0	0.0128737	0	0.0813155	0	0.087913	0.0223306	0	0	0	0.0761696	0	0.0371324	0	0.083118	0.335955	0.0114501	0	0.220324	0	0.00475656	0.0266612	0.55	0.0160454	1.07532
TCGA-HT-7469	0	0.00172097	0.0256358	0.0180691	0	0.127158	0	0.0230019	0	0	0	0.0561781	0.230928	0	0	0.27001	0	0.0209139	0.168361	0	0	0.0580231	0.43	0.0290348	1.0719
TCGA-HT-7470	0	0.0244915	0	0.0299443	0.00284997	0.0550981	0	0.00273431	0	0	0	0.0563729	0.453214	0	0.0104877	0.329109	0	0	0.0333908	0	0	0.00230798	0.31	0.0469123	1.10219
TCGA-HT-7471	0.0105923	0	0	0	0	0.0937979	0	0	0	0	0	0.0396499	0.314515	0	0.0573849	0.372398	0.00602826	0	0.102395	0	0.00323922	0	0.04	0.176461	1.02585
TCGA-HT-7472	0	0.00695222	0.00122751	0.0390621	0	0.0987814	0	0.00761	0	0	0	0.0380428	0.308071	0	0.0148482	0.428699	0.00820407	0	0.0485025	0	0	0	0.04	0.180785	1.02744
TCGA-HT-7473	0.00522926	0.0168071	0	0.0321717	0	0.04265	0.025612	0	0.00884166	0	0.0110014	0	0.296632	0	0.00446275	0.463056	0.00130585	0	0.0832203	0	0.00674388	0.0022658	0.02	0.290112	0.977147
TCGA-HT-7474	0	0.00819789	0.00226675	0.0498455	0	0.0537703	0	0.0381869	0	0	0	0.0301354	0.270991	0.124071	0.0440519	0.0891078	0	0	0.17438	0	0.114995	0	0.62	0.00764011	1.07994
TCGA-HT-7475	0	0	0.00487204	0.040703	0	0.278724	0	0	0	0	0	0.01034	0.0885554	0.241664	0.00425015	0	0	0	0.20556	0	0	0.125331	0.53	0.0180079	1.09093
TCGA-HT-7476	0.0370096	0	0	0.0431094	0	0.212308	0	0.0135007	0	0	0	0.0365	0.28938	0	0.0915995	0.202271	0	0	0.0151558	0	0.0529356	0.00623144	0.21	0.0734135	1.05874
TCGA-HT-7477	0.0242165	0	0	0	0	0.190016	0	0.0250989	0	0	0.0404499	0.0865563	0.270898	0	0.0436144	0.25524	0	0.0030374	0	0.0369328	0.00590717	0.0180323	0.39	0.0376056	1.07727
TCGA-HT-7478	0.00460638	0	0.0013855	0.041907	0	0.110069	0	0	0	0	0	0.0719161	0.303106	0	0.016347	0.28563	0	0	0	0.0911428	0.0263196	0.0475715	0.02	0.307673	0.964394
TCGA-HT-7479	0.00398441	0.0009	0.00165652	0	0	0.196124	0	0.00138553	0.0087856	0	0	0.10242	0.240554	0	0.00637579	0.182979	0	0	0	0.230832	0.0181385	0.0058709	0.02	0.289532	0.977052
TCGA-HT-7480	0	0.0159703	0.00813942	0	0.0653843	0.00884073	0.0009	0.0264663	0	0	0.102266	0	0.276935	0	0.0255795	0.292341	0	0	0.128995	0	0.0481934	0	0.84	-0.0195	1.09193
TCGA-HT-7481	0.0467257	0	0	0.0528334	0	0.065459	0	0.0303676	0	0	0	0.0748564	0.35234	0.132921	0.0379161	0.157298	0	0	0	0.0222563	0.0270271	0	0.21	0.0704818	1.06858
TCGA-HT-7482	0.0008	0	0.00474013	0	0	0.106105	0	0.0140988	0	0	0	0.0730492	0.565734	0	0	0.10974	0	0.00616867	0	0.0980073	0.00592648	0.0155873	0.04	0.178772	1.0485
TCGA-HT-7483	0	0	0.00171019	0	0	0.132993	0	0	0	0	0	0.104517	0.284425	0	0.0658279	0.215157	0	0	0	0.154004	0.0413652	0	0.24	0.0632945	1.07805
TCGA-HT-7485	0.00276726	0	0	0	0	0.110045	0	0.00337473	0.00205961	0	0.00390377	0.0415075	0.38455	0	0.0124036	0.396503	0	0	0.0399934	0	0.00289149	0	0.06	0.152999	1.0478
TCGA-HT-7601	0.00336366	0	0.00163208	0.043996	0	0.0439177	0.00461554	0	0.00798805	0	0	0.00426418	0.328424	0	0.0254102	0.454976	0	0	0.0814128	0	0	0	0	0.396223	0.924033
TCGA-HT-7602	0.00193289	0.0079158	0	0	0	0.134701	0	0	0.025058	0	0	0.0311121	0.278889	0	0.0133758	0.26835	0.0007	0	0.181689	0	0.0563067	0	0.06	0.151417	1.02569
TCGA-HT-7603	0	0.00957059	0.0131718	0	0	0.124106	0	0.00442953	0	0	0.0639383	0	0.422018	0.0154179	0	0.101579	0	0.00442237	0.128703	0	0.104772	0.00787177	0.49	0.0207594	1.08934
TCGA-HT-7604	0	0	0.00477627	0.00857067	0	0.0688506	0	0.00111087	0	0	0.00681525	0.0287213	0.347876	0	0.00186759	0.330902	0	0.00507697	0	0.192961	0.0007	0.00177378	0.21	0.0707204	1.09112
TCGA-HT-7605	0	0.0081647	0	0.0240796	0	0.0533371	0	0.0362393	0	0	0	0.0723042	0.407061	0	0.0901975	0.157143	0	0	0	0.151473	0	0	0.14	0.09304	1.07394
TCGA-HT-7606	0.0009	0	0	0	0.0543406	0.127033	0	0	0.0001	0	0	0.0156378	0.0832691	0	0.0166554	0.43096	0.013214	0	0.235154	0	0	0.022795	0.43	0.0330124	1.07988
TCGA-HT-7607	0	0.0571492	0.00472737	0.0109243	0	0.0845429	0	0.0107908	0	0	0	0.0459806	0.319939	0	0.0405047	0.340873	0	0.00216277	0.045662	0	0.0276002	0.00914304	0.24	0.0658805	1.0704
TCGA-HT-7608	0.0214826	0	0	0	0.00678206	0.104326	0	0.00397653	0	0	0	0.0404387	0.352646	0	0.0117185	0.163779	0	0	0	0.253503	0.0413471	0	0.12	0.115135	1.06787
TCGA-HT-7609	0.00820999	0	0	0	0.00842905	0.0842403	0	0.00164576	0	0	0	0.0597811	0.379759	0	0	0.198556	0	0	0	0.210994	0.0483854	0	0.04	0.173855	1.03997
TCGA-HT-7610	0	0.004521	0	0	0	0.0976591	0	0.00598183	0	0	0	0.0586714	0.279182	0	0	0.0945225	0	0	0	0.332356	0.127107	0	0.3	0.0483268	1.11918
TCGA-HT-7611	0	0	0.00123478	0.0117015	0	0.0716972	0	0	0	0	0	0.0581668	0.331103	0	0.0170359	0.505956	0	0	0	0	0	0.00310436	0.05	0.158698	1.05503
TCGA-HT-7616	0.0203962	0	0.0639113	0.042908	0	0.17285	0.0934872	0	0	0	0.0177045	0	0.146566	0	0.0920833	0.315014	0	0	0.0350785	0	0	0	0.04	0.175809	1.00829
TCGA-HT-7620	0.0082368	0.0300945	0	0	0.041235	0.0994404	0.00402896	0	0	0	0.0593019	0	0.52748	0	0	0.209694	0	0	0.0157123	0	0.00477609	0	0.04	0.176301	1.04093
TCGA-HT-7676	0.00113427	0	0.00285545	0	0	0.0566195	0	0	0.0130237	0	0	0.00503266	0.399568	0	0.0001	0.238007	0	0	0.242544	0	0	0.0411513	0.03	0.242728	1.00448
TCGA-HT-7677	0.0129822	0	0	0.0493217	0	0.047777	0	0.0287769	0	0	0	0.0321656	0.268848	0	0.021642	0.243685	0	0	0	0.24315	0.0282795	0.0233719	0.21	0.0720736	1.08253
TCGA-HT-7680	0.0679376	0	0.00155615	0.00990754	0	0.066881	0	0.0100955	0	0	0	0.0358959	0.315517	0	0	0.219706	0	0.0073838	0	0.173671	0.0656344	0.0258147	0.07	0.149098	1.03987
TCGA-HT-7681	0	0.0141418	0.00202146	0.0933111	0	0.136331	0	0.00674108	0	0.0143074	0	0.0742458	0.362368	0	0.0737738	0.170016	0	0	0	0.0453632	0.00738011	0	0.21	0.0712334	1.06935
TCGA-HT-7684	0.0065544	0	0	0	0	0.0370262	0	0.0102466	0.00476886	0	0	0.0461117	0.506882	0	0.00243733	0.13913	0	0.00727707	0	0.159101	0.0804647	0	0.05	0.15892	1.05689
TCGA-HT-7686	0.00230382	0.0103327	0.00112093	0	0	0.084882	0.0168009	0	0.012742	0	0.0372586	0	0.331018	0	0.00118994	0.311018	0	0.00726767	0.140357	0	0	0.0437084	0.04	0.197171	1.01519
TCGA-HT-7687	0.0170518	0	0	0.0382151	0	0.116755	0	0.00567075	0	0.0131235	0	0.0426319	0.185192	0	0.0523799	0.444401	0	0	0	0.0830782	0.00150119	0	0.22	0.0685891	1.07202
TCGA-HT-7688	0.00121677	0	0	0.0397544	0	0.061148	0	0.0357046	0	0	0	0.0704574	0.244716	0.0202774	0.0642706	0.132963	0	0	0	0.165416	0.152483	0.0115934	0.31	0.0477836	1.08084
TCGA-HT-7689	0	0.00348227	0	0	0	0.131963	0	0	0	0	0.033062	0.00995387	0.254209	0	0.0549149	0.378871	0	0	0.105063	0	0.0223618	0.00611824	0.12	0.110944	1.04785
TCGA-HT-7690	0.0006	0.00729936	0	0.0524182	0	0.0444385	0.00929645	0	0	0	0.0286661	0.0176438	0.147684	0.103136	0.0384774	0.524461	0	0	0.0258412	0	0	0	0.03	0.263574	0.994567
TCGA-HT-7691	0.0124345	0	0	0.013457	0	0.0418193	0	0.0122122	0	0	0	0.032339	0.290935	0	0.0043625	0.166126	0	0	0	0.265373	0.160926	0	0.36	0.0397605	1.10847
TCGA-HT-7692	0.0109279	0	0	0.0007	0	0.0886528	0	0.00840453	0	0	0.0237245	0.0494922	0.273483	0	0.00441506	0.42902	0	0	0	0.0989709	0.0122529	0	0.13	0.0952304	1.06953
TCGA-HT-7693	0	0.00562854	0.00141573	0	0	0.148667	0	0	0.00678474	0	0.0326434	0.016261	0.149635	0.0132389	0.00370125	0.445713	0	0	0	0.127862	0	0.0484496	0.04	0.211757	1.0113
TCGA-HT-7694	0	0.00351647	0	0.0427994	0	0.0608505	0	0.0431359	0	0	0	0.0433333	0.401574	0	0	0.318449	0	0	0	0.0513113	0.0186787	0.0163516	0.32	0.0431606	1.09623
TCGA-HT-7695	0	0.00459879	0	0	0	0.0614947	0	0.0339195	0	0.00510471	0	0.0455568	0.514611	0.0130459	0.0488252	0.087592	0	0	0	0.158932	0.0263192	0	0.31	0.0474654	1.10705
[truncated: 814 more rows]

## Sheet: Table 6
Seven inflammatory metagene signatures
HCK	AIF1
	C1QA
	C1QB
[truncated: 101 more rows]
